# Supplementary material for: Prolyl dihydroxylation of unassembled uS12/Rps23 regulates fungal hypoxic adaptation
Source: eLife. 2017 Oct 30;6:e28563. doi: 10.7554/eLife.28563 (PMC5690285; doi:10.7554/eLife.28563)
Supplement: Figure 1—source data 1. — SILAC ratios used to quantify Rps23 P62 hydroxylation shown in Figure 1F and Figure 4A–B. [file elife-28563-fig1-data1.xlsx]

## Sheet: Key
Key
Sheet	Description	Figure
WT (H) alone	40S ribosomal protein PSMs; used to calculate labeling efficiency (e)	1F, 4A
WT(H)-ofd1Δ(L)	Rps23 PSMs from WT (Heavy) and ofd1Δ (Light) SILAC pair	1F
WT(H)-ofd1H142A D144A(L)	Rps23 PSMs from WT (Heavy) and ofd1H142AD144A (Light) SILAC pair	1F
WT (H)-nro1Δ (L)	Rps23 PSMs from WT (Heavy) and nro1Δ (Light) SILAC pair	4A
ofd1Δ (H) alone	40S ribosomal protein PSMs; used to calculate labeling efficiency (e)	4B
ofd1Δ (H)-nro1Δ (L)	Rps23 PSMs from ofd1Δ (Heavy) and nro1Δ (Light) SILAC pair	4B

## Sheet: WT (H) alone
Sequence	PSM Ambiguity	Protein Descriptions	# Proteins	# Protein Groups	Protein Group Accessions	Modifications	Activation Type	ΔScore	ΔCn	Rank	Search Engine Rank	QuanResultID	# Missing Channels	# Single-Peak Channels	Precursor Area	Quan Channel	Quan Info	Quan Usage	Light	Heavy	H/L (sj)	snj	log2(snj)
VGALPPTWK	Unambiguous	40S ribosomal protein S13 [Schizosaccharomyces pombe 972h-]	1	1	19114812		HCD	1	0	1	1	3885	1		1.0198e+08	Light	Unique	Used	71481056	3174.94	4.44165e-05	2.68297e-05	-15.1858
ELRPLQITSAREVEVGGGK	Unambiguous	40S ribosomal protein S7 [Schizosaccharomyces pombe 972h-]	1	1	19114589		HCD	1	0	1	1	5619	1		5.82133e+07	Light	Unique	Used	16954250	3174.94	0.000187265	0.000113111	-13.11
QmVVDILHPGK	Unambiguous	40S ribosomal protein S24 [Schizosaccharomyces pombe 972h-]	2	2	19112688;19115165	M2(Oxidation)	HCD	1	0	1	1	1528	1		5.0902e+06	Light	Not Unique	Used	3257646	3174.94	0.000974612	0.000588494	-10.7307
FPFEGVEVK	Unambiguous	40S ribosomal protein S5 [Schizosaccharomyces pombe 972h-]	2	1	19115124		HCD	1	0	1	1	2015	1	1	3.24255e+06	Light	Unique	Used	3.24255e+06	3174.94	0.00097915	0.000591234	-10.724
VGALPPTWK	Unambiguous	40S ribosomal protein S13 [Schizosaccharomyces pombe 972h-]	1	1	19114812		HCD	1	0	1	1	4343	1	1	1.03124e+06	Light	Unique	Used	1.03124e+06	3174.94	0.00307876	0.00185749	-9.07243
VGALPPTWK	Unambiguous	40S ribosomal protein S13 [Schizosaccharomyces pombe 972h-]	1	1	19114812		HCD	1	0	1	1	4352	1	1	931056	Light	Unique	Used	931056	3174.94	0.00341004	0.00205708	-8.92518
VMFAmTQIK	Unambiguous	40S ribosomal protein S18 [Schizosaccharomyces pombe 972h-]	1	1	19113298	M5(Oxidation)	HCD	1	0	1	1	1543	1	1	461051	Light	Unique	Used	461051	3174.94	0.00688631	0.00414842	-7.91322
TLVNRTAGLk	Unambiguous	40S ribosomal protein S1 [Schizosaccharomyces pombe 972h-]	2	2	19114028;19113740	K10(Label:13C(6)15N(2))	HCD	1	0	1	1	2868		1	1.15288e+08	Heavy	Not Unique	Used	203257440	59872448	0.294565	0.159349	-2.64974
TDASAVQAFGLRTHYGGGRTTGFALIYDDVEAmk	Unambiguous	40S ribosomal protein S24 [Schizosaccharomyces pombe 972h-]	1	1	19115165	M33(Oxidation); K34(Label:13C(6)15N(2))	HCD	1	0	1	1	8032		1	2.24251e+06	Heavy	Unique	Used	727328	268551	0.369229	0.194588	-2.3615
APAFFEVK	Unambiguous	40S ribosomal protein S1 [Schizosaccharomyces pombe 972h-]	2	2	19114028;19113740		HCD	1	0	1	1	1954		1	5.79488e+06	Light	Not Unique	Used	5.79488e+06	3.6552e+06	0.630765	0.304876	-1.7137
TLVNRTAGLk	Unambiguous	40S ribosomal protein S1 [Schizosaccharomyces pombe 972h-]	2	2	19114028;19113740	K10(Label:13C(6)15N(2))	HCD	1	0	1	1	6004			7.60587e+06	Heavy	Not Unique	Used	9.1223e+06	6.94565e+06	0.761392	0.353389	-1.50067
QmVVDILHPGk	Unambiguous	40S ribosomal protein S24 [Schizosaccharomyces pombe 972h-]	2	2	19112688;19115165	M2(Oxidation); K11(Label:13C(6)15N(2))	HCD	1	0	1	1	1504		1	1.11726e+07	Heavy	Not Unique	Used	4.02067e+06	7566132	1.88181	0.651383	-0.618423
VGALPPTWK	Unambiguous	40S ribosomal protein S13 [Schizosaccharomyces pombe 972h-]	1	1	19114812		HCD	1	0	1	1	1739		1	1.29536e+06	Light	Unique	Used	1.29536e+06	2.74558e+06	2.11955	0.696127	-0.522578
EVATAIRGAIImGk	Unambiguous	40S ribosomal protein S2 [Schizosaccharomyces pombe 972h-]	1	1	19075935	M12(Oxidation); K14(Label:13C(6)15N(2))	HCD	1	0	1	1	6501		1	6.08493e+06	Heavy	Unique	Used	2.71158e+06	6.08493e+06	2.24405	0.717779	-0.478389
EVATAIRGAIImGk	Unambiguous	40S ribosomal protein S2 [Schizosaccharomyces pombe 972h-]	1	1	19075935	M12(Oxidation); K14(Label:13C(6)15N(2))	HCD	1	0	1	1	3743		1	176404112	Heavy	Unique	Used	78474536	176404112	2.24792	0.718432	-0.477076
RLLGTAYkSSPFGGSSHAk	Unambiguous	40S ribosomal protein S23 [Schizosaccharomyces pombe 972h-]	1	1	19112979	K8(Label:13C(6)15N(2)); K19(Label:13C(6)15N(2))	HCD	1	0	1	1	3094		1	1.5317e+07	Heavy	Unique	Used	2634932	5.96494e+06	2.26379	0.721109	-0.471711
GMSPSqIGVTLRDSHGIPQVRFITGQk	Unambiguous	40S ribosomal protein S13 [Schizosaccharomyces pombe 972h-]	1	1	19114812	Q6(Deamidated); K27(Label:13C(6)15N(2))	HCD	1	0	1	1	5752			6.26249e+06	Heavy	Unique	Used	2.62387e+06	6.26249e+06	2.38674	0.741243	-0.431981
QmVVDILHPGk	Unambiguous	40S ribosomal protein S24 [Schizosaccharomyces pombe 972h-]	2	2	19112688;19115165	M2(Oxidation); K11(Label:13C(6)15N(2))	HCD	1	0	1	1	3597			157018574	Heavy	Not Unique	Used	6.40968e+07	157018574	2.44971	0.751171	-0.412786
AILmQRLIQVDGk	Unambiguous	40S ribosomal protein S4 [Schizosaccharomyces pombe 972h-]	1	1	19112469	M4(Oxidation); K13(Label:13C(6)15N(2))	HCD	1	0	1	1	1670			33880297	Heavy	Unique	Used	12790177	31455656	2.45936	0.75267	-0.40991
DQYVPEVSELEVDRVNVDQDTk	Unambiguous	40S ribosomal protein S17 [Schizosaccharomyces pombe 972h-]	1	1	19112037	K22(Label:13C(6)15N(2))	HCD	1	0	1	1	5256		1	216433	Heavy	Unique	Used	84758.5	216433	2.55352	0.767	-0.382701
TDRDESSPYAAmLAAQDAAAk	Unambiguous	40S ribosomal protein S14 [Schizosaccharomyces pombe 972h-]	1	1	19115099	M12(Oxidation); K21(Label:13C(6)15N(2))	HCD	0.6804	0	1	1	3590		1	11076943	Heavy	Unique	Used	4.2511e+06	11076943	2.60567	0.774709	-0.368273
VPRRPFESARLDAELk	Unambiguous	40S ribosomal protein S9 [Schizosaccharomyces pombe 972h-]	2	2	19112632;19113857	K16(Label:13C(6)15N(2))	HCD	1	0	1	1	1272			1.51241e+07	Heavy	Not Unique	Used	5.62148e+06	1.51241e+07	2.6904	0.786908	-0.345733
QmVVDILHPGk	Unambiguous	40S ribosomal protein S24 [Schizosaccharomyces pombe 972h-]	2	2	19112688;19115165	M2(Oxidation); K11(Label:13C(6)15N(2))	HCD	1	0	1	1	1516		1	9.22163e+06	Heavy	Not Unique	Used	1.34e+06	3.60643e+06	2.69137	0.787045	-0.345481
VRTDSTFPTGFMDVISVEk	Unambiguous	40S ribosomal protein S4 [Schizosaccharomyces pombe 972h-]	2	2	19112469;19113142	K19(Label:13C(6)15N(2))	HCD	1	0	1	1	4900			7.24924e+06	Heavy	Not Unique	Used	2.23701e+06	6.51737e+06	2.91343	0.817199	-0.291241
DELERVAk	Unambiguous	40S ribosomal protein S5 [Schizosaccharomyces pombe 972h-]	2	1	19115124	K8(Label:13C(6)15N(2))	HCD	1	0	1	1	5990			7.48682e+06	Heavy	Unique	Used	2.55022e+06	7.48682e+06	2.93576	0.820095	-0.286137
RTRQATDGRk	Unambiguous	40S ribosomal protein S7 [Schizosaccharomyces pombe 972h-]	1	1	19114589	K10(Label:13C(6)15N(2))	HCD	1	0	1	1	4			1.55078e+07	Heavy	Unique	Used	5.12613e+06	1.52994e+07	2.98459	0.826348	-0.275179
AILmQRLIQVDGk	Unambiguous	40S ribosomal protein S4 [Schizosaccharomyces pombe 972h-]	1	1	19112469	M4(Oxidation); K13(Label:13C(6)15N(2))	HCD	1	0	1	1	3928			1.74559e+07	Heavy	Unique	Used	4.94379e+06	1.55136e+07	3.138	0.845289	-0.242484
GRRIRELTALVQk	Unambiguous	40S ribosomal protein S3 [Schizosaccharomyces pombe 972h-]	1	1	19113555	K13(Label:13C(6)15N(2))	HCD	1	0	1	1	962			4.29217e+08	Heavy	Unique	Used	1.34635e+08	4.29217e+08	3.188	0.851242	-0.232359
THLRNMIILPEMVGSVVGIYNGk	Unambiguous	40S ribosomal protein S15 [Schizosaccharomyces pombe 972h-]	2	1	19075461	K23(Label:13C(6)15N(2))	HCD	1	0	1	1	4973			49120367	Heavy	Unique	Used	1.51126e+07	49120367	3.2503	0.858516	-0.220083
AFVVIGDSDGHVGLGIk	Unambiguous	40S ribosomal protein S2 [Schizosaccharomyces pombe 972h-]	1	1	19075935	K17(Label:13C(6)15N(2))	HCD	1	0	1	1	4512			44316552	Heavy	Unique	Used	1.27644e+07	42154321	3.30248	0.864489	-0.210081
LDYVLALRIEDFLERRLQTQVFk	Unambiguous	40S ribosomal protein S9 [Schizosaccharomyces pombe 972h-]	2	2	19112632;19113857	K23(Label:13C(6)15N(2))	HCD	1	0	1	1	5848			4.32164e+06	Heavy	Not Unique	Used	745060	2.46524e+06	3.30879	0.865203	-0.208889
HGRPGIGATHSSRFIPLk	Unambiguous	40S ribosomal protein S15 [Schizosaccharomyces pombe 972h-]	2	1	19075461	K18(Label:13C(6)15N(2))	HCD	1	0	1	1	620			3.57339e+08	Heavy	Unique	Used	98092878	325339320	3.31665	0.866092	-0.207408
LNLETNk	Unambiguous	40S ribosomal protein S4 [Schizosaccharomyces pombe 972h-]	3	2	19112469;19113142	K7(Label:13C(6)15N(2))	HCD	1	0	1	1	3126		1	1.26886e+07	Heavy	Not Unique	Used	2.85388e+06	9484074	3.32323	0.866834	-0.206173
DQYVPEVSELEVDRVNVDQDTk	Unambiguous	40S ribosomal protein S17 [Schizosaccharomyces pombe 972h-]	1	1	19112037	K22(Label:13C(6)15N(2))	HCD	1	0	1	1	4970		1	3.63318e+06	Heavy	Unique	Used	1.08719e+06	3.63318e+06	3.3418	0.868919	-0.202707
TDASAVQAFGLRTHYGGGRTTGFALIYDDVEAMk	Unambiguous	40S ribosomal protein S24 [Schizosaccharomyces pombe 972h-]	1	1	19115165	K34(Label:13C(6)15N(2))	HCD	1	0	1	1	7279		1	7.38304e+06	Heavy	Unique	Used	756046	2547910	3.37004	0.872065	-0.197492
AILmQRLIQVDGk	Unambiguous	40S ribosomal protein S4 [Schizosaccharomyces pombe 972h-]	1	1	19112469	M4(Oxidation); K13(Label:13C(6)15N(2))	HCD	1	0	1	1	3921		1	2.09215e+07	Heavy	Unique	Used	2.73694e+06	9238813	3.3756	0.87268	-0.196475
FMTNRLLQRK	Unambiguous	40S ribosomal protein S24 [Schizosaccharomyces pombe 972h-]	2	2	19112688;19115165		HCD	1	0	1	1	910			307370491	Light	Not Unique	Used	307370491	1057700586	3.44113	0.879851	-0.184669
TGEHFRLVYDIk	Unambiguous	40S ribosomal protein S4 [Schizosaccharomyces pombe 972h-]	3	2	19112469;19113142	K12(Label:13C(6)15N(2))	HCD	1	0	1	1	1705			1.32036e+07	Heavy	Not Unique	Used	3.80697e+06	1.32036e+07	3.46826	0.882774	-0.179884
TDASAVQAFGLRTHYGGGRTTGFALIYDDVEAmk	Unambiguous	40S ribosomal protein S24 [Schizosaccharomyces pombe 972h-]	1	1	19115165	M33(Oxidation); K34(Label:13C(6)15N(2))	HCD	1	0	1	1	7395			3.38113e+07	Heavy	Unique	Used	8.02894e+06	2.78671e+07	3.47084	0.883051	-0.179432
NREEAAEFAQLMAk	Unambiguous	40S ribosomal protein S6 [Schizosaccharomyces pombe 972h-]	2	1	19113745	K14(Label:13C(6)15N(2))	HCD	1	0	1	1	6758			6.47732e+07	Heavy	Unique	Used	13912902	48894146	3.5143	0.887675	-0.171897
HGYIDEFTEIDDHRSGk	Unambiguous	40S ribosomal protein S22 [Schizosaccharomyces pombe 972h-]	1	1	19114146	K17(Label:13C(6)15N(2))	HCD	1	0	1	1	6593			3.91968e+06	Heavy	Unique	Used	1.10855e+06	3.91968e+06	3.53586	0.889943	-0.168215
kDEGAAPSGFAPSFRGGFGRPQ	Unambiguous	40S ribosomal protein S10 [Schizosaccharomyces pombe 972h-]	1	1	19114930	K1(Label:13C(6)15N(2))	HCD	1	0	1	1	1769			9.43637e+07	Heavy	Unique	Used	2.31678e+07	82878698	3.57732	0.894262	-0.16123
TRIIQVAYHPSNNELVRTnTLTk	Unambiguous	40S ribosomal protein S8 [Schizosaccharomyces pombe 972h-]	2	1	19115431	N19(Deamidated); K23(Label:13C(6)15N(2))	HCD	0.1373	0	1	1	3872			86171334	Heavy	Unique	Used	2.40052e+07	86171334	3.58969	0.89554	-0.159171
TTYAQSSQIRAIRQK	Unambiguous	40S ribosomal protein S1 [Schizosaccharomyces pombe 972h-]	1	1	19114028		HCD	1	0	1	1	344			4.81488e+07	Light	Unique	Used	4.81488e+07	172892666	3.5908	0.895654	-0.158987
LLAGLAVRRAAYGVLRYVMEAGAk	Unambiguous	40S ribosomal protein S3 [Schizosaccharomyces pombe 972h-]	1	1	19113555	K24(Label:13C(6)15N(2))	HCD	1	0	1	1	5842			3.92703e+07	Heavy	Unique	Used	1.09064e+07	3.92703e+07	3.60068	0.89667	-0.157351
TVRFNVLRVVK	Unambiguous	40S ribosomal protein S11 [Schizosaccharomyces pombe 972h-]	1	1	19115584		HCD	1	0	1	1	3820			264084210	Light	Unique	Used	264084210	951122152	3.60159	0.896763	-0.157202
ImLPEPk	Unambiguous	40S ribosomal protein S3 [Schizosaccharomyces pombe 972h-]	1	1	19113555	M2(Oxidation); K7(Label:13C(6)15N(2))	HCD	1	0	1	1	6344			6.20919e+06	Heavy	Unique	Used	1.72333e+06	6.20919e+06	3.60302	0.89691	-0.156965
GRFTVHRITAEEAk	Unambiguous	40S ribosomal protein S4 [Schizosaccharomyces pombe 972h-]	3	2	19112469;19113142	K14(Label:13C(6)15N(2))	HCD	1	0	1	1	323			8.92032e+07	Heavy	Not Unique	Used	2.36113e+07	85160848	3.60678	0.897295	-0.156346
HEIWRVALTLSk	Unambiguous	40S ribosomal protein S9 [Schizosaccharomyces pombe 972h-]	2	2	19112632;19113857	K12(Label:13C(6)15N(2))	HCD	1	0	1	1	6742			2.14725e+07	Heavy	Not Unique	Used	4.98356e+06	17990172	3.6099	0.897615	-0.155832
TTYAQSSQIRAIRQk	Unambiguous	40S ribosomal protein S1 [Schizosaccharomyces pombe 972h-]	1	1	19114028	K15(Label:13C(6)15N(2))	HCD	1	0	1	1	341			1.31618e+08	Heavy	Unique	Used	3.6343e+07	1.31618e+08	3.62155	0.898805	-0.15392
EDDVRQFVIRREVVPk	Unambiguous	40S ribosomal protein S6 [Schizosaccharomyces pombe 972h-]	2	1	19113745	K16(Label:13C(6)15N(2))	HCD	1	0	1	1	7746			1.81855e+07	Heavy	Unique	Used	5.00751e+06	1.81482e+07	3.62419	0.899074	-0.153488
LRVEDIQGK	Unambiguous	40S ribosomal protein S1 [Schizosaccharomyces pombe 972h-]	2	2	19114028;19113740		HCD	1	0	1	1	618			100328743	Light	Not Unique	Used	86525296	314469024	3.63442	0.900114	-0.15182
RVVDPFSRk	Unambiguous	40S ribosomal protein S1 [Schizosaccharomyces pombe 972h-]	2	2	19114028;19113740	K9(Label:13C(6)15N(2))	HCD	1	0	1	1	2936			143397461	Heavy	Not Unique	Used	38908861	141660335	3.64082	0.900764	-0.150779
DQYVPEVSELEVDRVNVDQDTk	Unambiguous	40S ribosomal protein S17 [Schizosaccharomyces pombe 972h-]	1	1	19112037	K22(Label:13C(6)15N(2))	HCD	1	0	1	1	5114			34810003	Heavy	Unique	Used	9.21128e+06	3.3553e+07	3.6426	0.900944	-0.150491
STEGDHVPQAEEVIETVEVVEEETGSSPLSVEDSLk	Unambiguous	40S ribosomal protein S12 [Schizosaccharomyces pombe 972h-]	1	1	19111998	K36(Label:13C(6)15N(2))	HCD	1	0	1	1	7447			2.27858e+07	Heavy	Unique	Used	5.43638e+06	19930663	3.66616	0.903321	-0.146689
NREEAAEFAQLmAk	Unambiguous	40S ribosomal protein S6 [Schizosaccharomyces pombe 972h-]	2	1	19113745	M12(Oxidation); K14(Label:13C(6)15N(2))	HCD	1	0	1	1	3588		1	5.80466e+06	Heavy	Unique	Used	1.57304e+06	5.80466e+06	3.69009	0.905717	-0.142868
ADADSVVEQILk	Unambiguous	40S ribosomal protein S13 [Schizosaccharomyces pombe 972h-]	1	1	19114812	K12(Label:13C(6)15N(2))	HCD	1	0	1	1	2171		1	1.25159e+06	Heavy	Unique	Used	188158	694828	3.69279	0.905985	-0.14244
EWVPVTk	Unambiguous	40S ribosomal protein S2 [Schizosaccharomyces pombe 972h-]	1	1	19075935	K7(Label:13C(6)15N(2))	HCD	1	0	1	1	1204			7.42843e+08	Heavy	Unique	Used	198857774	736922420	3.70578	0.907277	-0.140385
HEIWRVALTLSk	Unambiguous	40S ribosomal protein S9 [Schizosaccharomyces pombe 972h-]	2	2	19112632;19113857	K12(Label:13C(6)15N(2))	HCD	1	0	1	1	1882			1.50213e+08	Heavy	Not Unique	Used	4.02507e+07	1.49536e+08	3.71512	0.908203	-0.138913
GSSNSYAIk	Unambiguous	40S ribosomal protein S5 [Schizosaccharomyces pombe 972h-]	2	1	19115124	K9(Label:13C(6)15N(2))	HCD	1	0	1	1	5998			1.38578e+07	Heavy	Unique	Used	3.72967e+06	1.38578e+07	3.71555	0.908245	-0.138846
TDRDESSPYAAmLAAQDAAAk	Unambiguous	40S ribosomal protein S14 [Schizosaccharomyces pombe 972h-]	1	1	19115099	M12(Oxidation); K21(Label:13C(6)15N(2))	HCD	0.5517	0	1	1	3600			4.09717e+07	Heavy	Unique	Used	1.06348e+07	39720833	3.73497	0.910161	-0.135807
QpNSAIRk	Unambiguous	40S ribosomal protein S23 [Schizosaccharomyces pombe 972h-]	1	1	19112979	P2(Dioxidation); K8(Label:13C(6)15N(2))	HCD	1	0	1	1	2797		1	3.44214e+06	Heavy	Unique	Used	638542	2.38595e+06	3.73655	0.910316	-0.13556
VDELTVDFVGVGk	Unambiguous	40S ribosomal protein cpc2/RACK1 [Schizosaccharomyces pombe 972h-]	1	1	19114682	K13(Label:13C(6)15N(2))	HCD	1	0	1	1	4624			32846971	Heavy	Unique	Used	7.51551e+06	28271435	3.76175	0.912782	-0.131658
LIEIDDDRRLRVFMEk	Unambiguous	40S ribosomal protein S6 [Schizosaccharomyces pombe 972h-]	2	1	19113745	K16(Label:13C(6)15N(2))	HCD	1	0	1	1	2593			3.00803e+06	Heavy	Unique	Used	740230	2.79007e+06	3.7692	0.913507	-0.130512
LIPEVIGREIERATGSIFPLQNVLVRk	Unambiguous	40S ribosomal protein S1 [Schizosaccharomyces pombe 972h-]	1	1	19114028	K27(Label:13C(6)15N(2))	HCD	1	0	1	1	5163			1.34839e+08	Heavy	Unique	Used	3.57282e+07	134725180	3.77084	0.913667	-0.13026
ATSTPNPk	Unambiguous	40S ribosomal protein S8 [Schizosaccharomyces pombe 972h-]	1	1	19115431	K8(Label:13C(6)15N(2))	HCD	1	0	1	1	99			1.04982e+06	Heavy	Unique	Used	278182	1.04982e+06	3.77386	0.91396	-0.129797
TDASAVQAFGLRTHYGGGRTTGFALIYDDVEAmk	Unambiguous	40S ribosomal protein S24 [Schizosaccharomyces pombe 972h-]	1	1	19115165	M33(Oxidation); K34(Label:13C(6)15N(2))	HCD	1	0	1	1	5122			2.25511e+07	Heavy	Unique	Used	5.65191e+06	2.1465e+07	3.79782	0.916278	-0.126143
FRLILIESRIHRLARYYRk	Unambiguous	40S ribosomal protein S13 [Schizosaccharomyces pombe 972h-]	1	1	19114812	K19(Label:13C(6)15N(2))	HCD	1	0	1	1	2608		1	5.1646e+06	Heavy	Unique	Used	362086	1.3815e+06	3.8154	0.917967	-0.123485
NLEVRmDNYVWk	Unambiguous	40S ribosomal protein S0A [Schizosaccharomyces pombe 972h-]	1	1	19112932	M6(Oxidation); K12(Label:13C(6)15N(2))	HCD	1	0	1	1	6594		1	1131897	Heavy	Unique	Used	296546	1131897	3.81694	0.918114	-0.123254
SLPDIVVVLDPk	Unambiguous	40S ribosomal protein S3 [Schizosaccharomyces pombe 972h-]	1	1	19113555	K12(Label:13C(6)15N(2))	HCD	1	0	1	1	2178			2.39983e+06	Heavy	Unique	Used	549562	2.11186e+06	3.8428	0.920582	-0.119382
RVQLGAk	Unambiguous	40S ribosomal protein S4 [Schizosaccharomyces pombe 972h-]	3	2	19112469;19113142	K7(Label:13C(6)15N(2))	HCD	1	0	1	1	181			1.43199e+08	Heavy	Not Unique	Used	3.72295e+07	1.43199e+08	3.84638	0.920921	-0.11885
THLRNmIILPEmVGSVVGIYnGk	Unambiguous	40S ribosomal protein S15 [Schizosaccharomyces pombe 972h-]	2	1	19075461	M6(Oxidation); M12(Oxidation); N21(Deamidated); K23(Label:13C(6)15N(2))	HCD	1	0	1	1	4500			1.33113e+08	Heavy	Unique	Used	3.43735e+07	1.32292e+08	3.84866	0.921137	-0.118512
FELGRQPSNTRIGPK	Unambiguous	40S ribosomal protein S8 [Schizosaccharomyces pombe 972h-]	2	1	19115431		HCD	1	0	1	1	945			5.94121e+08	Light	Unique	Used	5.94121e+08	2295125044	3.86306	0.9225	-0.116379
YGLNISRQSFREYANDIGFVk	Unambiguous	40S ribosomal protein S29 [Schizosaccharomyces pombe 972h-]	1	1	19112005	K21(Label:13C(6)15N(2))	HCD	1	0	1	1	6974			2.47789e+07	Heavy	Unique	Used	3760599	1.45563e+07	3.87075	0.923225	-0.115246
RVVDPFSRk	Unambiguous	40S ribosomal protein S1 [Schizosaccharomyces pombe 972h-]	2	2	19114028;19113740	K9(Label:13C(6)15N(2))	HCD	1	0	1	1	589			2.39138e+08	Heavy	Not Unique	Used	6.15593e+07	2.39138e+08	3.88467	0.924534	-0.113202
DELERVAk	Unambiguous	40S ribosomal protein S5 [Schizosaccharomyces pombe 972h-]	2	1	19115124	K8(Label:13C(6)15N(2))	HCD	1	0	1	1	2851			1.43695e+08	Heavy	Unique	Used	36577834	1.42646e+08	3.89981	0.925949	-0.110995
NREEAAEFAQLmAk	Unambiguous	40S ribosomal protein S6 [Schizosaccharomyces pombe 972h-]	2	1	19113745	M12(Oxidation); K14(Label:13C(6)15N(2))	HCD	1	0	1	1	3594		1	4.22656e+07	Heavy	Unique	Used	5.86039e+06	22865102	3.90163	0.92612	-0.110729
RLIDLHSPSEIVk	Unambiguous	40S ribosomal protein S20 [Schizosaccharomyces pombe 972h-]	1	1	19075936	K13(Label:13C(6)15N(2))	HCD	1	0	1	1	3857			83864051	Heavy	Unique	Used	20617193	8.04476e+07	3.90197	0.926151	-0.110681
ATSTPNPk	Unambiguous	40S ribosomal protein S8 [Schizosaccharomyces pombe 972h-]	1	1	19115431	K8(Label:13C(6)15N(2))	HCD	1	0	1	1	5886			4.98461e+06	Heavy	Unique	Used	1.22579e+06	4.78624e+06	3.90461	0.926398	-0.110297
ATNnIYPLQNVFVRk	Unambiguous	40S ribosomal protein S1 [Schizosaccharomyces pombe 972h-]	1	1	19113740	N4(Deamidated); K15(Label:13C(6)15N(2))	HCD	0.193	0	1	1	4521			3.78901e+07	Heavy	Unique	Used	7.53523e+06	29454372	3.90889	0.926796	-0.109677
WQTTIEADQTIk	Unambiguous	40S ribosomal protein S1 [Schizosaccharomyces pombe 972h-]	1	1	19114028	K12(Label:13C(6)15N(2))	HCD	1	0	1	1	6580			1.71175e+07	Heavy	Unique	Used	4.37106e+06	1.71175e+07	3.91609	0.927465	-0.108635
TRIIQVAYHPSnNELVRTNTLTk	Unambiguous	40S ribosomal protein S8 [Schizosaccharomyces pombe 972h-]	2	1	19115431	N12(Deamidated); K23(Label:13C(6)15N(2))	HCD	0.1341	0	1	1	6577			4.67443e+06	Heavy	Unique	Used	967432	3.79473e+06	3.92248	0.928058	-0.107713
GRRIRELTALVQk	Unambiguous	40S ribosomal protein S3 [Schizosaccharomyces pombe 972h-]	1	1	19113555	K13(Label:13C(6)15N(2))	HCD	1	0	1	1	6201			1.15716e+07	Heavy	Unique	Used	2.84527e+06	1.11619e+07	3.92298	0.928104	-0.107641
HEIWRVALTLSk	Unambiguous	40S ribosomal protein S9 [Schizosaccharomyces pombe 972h-]	2	2	19112632;19113857	K12(Label:13C(6)15N(2))	HCD	1	0	1	1	1881			2.66654e+07	Heavy	Not Unique	Used	5.5301e+06	21704083	3.92471	0.928265	-0.107391
LRVEDIQGk	Unambiguous	40S ribosomal protein S1 [Schizosaccharomyces pombe 972h-]	2	2	19114028;19113740	K9(Label:13C(6)15N(2))	HCD	1	0	1	1	6092			2.70748e+06	Heavy	Not Unique	Used	683136	2.68314e+06	3.92768	0.928539	-0.106965
VELAVLk	Unambiguous	ubiquitin-40S ribosomal protein S31 fusion protein [Schizosaccharomyces pombe 972h-]	2	1	19114970	K7(Label:13C(6)15N(2))	HCD	1	0	1	1	1563			6.84398e+06	Heavy	Unique	Used	1.74169e+06	6.84398e+06	3.9295	0.928708	-0.106703
ADIDMSk	Unambiguous	40S ribosomal protein S18 [Schizosaccharomyces pombe 972h-]	1	1	19113298	K7(Label:13C(6)15N(2))	HCD	1	0	1	1	5996			2.2562e+06	Heavy	Unique	Used	572333	2.2562e+06	3.9421	0.929871	-0.104898
FELGRQPSNTRIGPk	Unambiguous	40S ribosomal protein S8 [Schizosaccharomyces pombe 972h-]	2	1	19115431	K15(Label:13C(6)15N(2))	HCD	1	0	1	1	6199			6.641e+07	Heavy	Unique	Used	1.6846e+07	6.641e+07	3.94218	0.929878	-0.104886
NLLAADSHIGSk	Unambiguous	40S ribosomal protein S0B [Schizosaccharomyces pombe 972h-]	1	1	19115325	K12(Label:13C(6)15N(2))	HCD	1	0	1	1	3239			90150720	Heavy	Unique	Used	22858394	90150720	3.94388	0.930034	-0.104644
ADIDmSk	Unambiguous	40S ribosomal protein S18 [Schizosaccharomyces pombe 972h-]	1	1	19113298	M5(Oxidation); K7(Label:13C(6)15N(2))	HCD	1	0	1	1	5902			3.17665e+06	Heavy	Unique	Used	802075	3.17665e+06	3.96055	0.931565	-0.102272
WQTTIEADQTIk	Unambiguous	40S ribosomal protein S1 [Schizosaccharomyces pombe 972h-]	1	1	19114028	K12(Label:13C(6)15N(2))	HCD	1	0	1	1	3940			313886061	Heavy	Unique	Used	7.92189e+07	313886061	3.96226	0.931722	-0.102028
SFQLLANNVDSk	Unambiguous	40S ribosomal protein S18 [Schizosaccharomyces pombe 972h-]	1	1	19113298	K12(Label:13C(6)15N(2))	HCD	1	0	1	1	1872			7.58871e+06	Heavy	Unique	Used	1.71894e+06	6.81924e+06	3.96712	0.932166	-0.101341
SFQLLAnNVDSk	Unambiguous	40S ribosomal protein S18 [Schizosaccharomyces pombe 972h-]	1	1	19113298	N7(Deamidated); K12(Label:13C(6)15N(2))	HCD	0.194	0	1	1	1888			8.13896e+07	Heavy	Unique	Used	2.04993e+07	8.13896e+07	3.97037	0.932463	-0.100882
GSSNSYAIK	Unambiguous	40S ribosomal protein S5 [Schizosaccharomyces pombe 972h-]	2	1	19115124		HCD	1	0	1	1	319			1.5909e+08	Light	Unique	Used	1.5909e+08	632016228	3.97269	0.932675	-0.100553
EYQIVDYFLPRLnDEVmk	Unambiguous	40S ribosomal protein S2 [Schizosaccharomyces pombe 972h-]	1	1	19075935	N13(Deamidated); M17(Oxidation); K18(Label:13C(6)15N(2))	HCD	1	0	1	1	7332			4.05764e+07	Heavy	Unique	Used	9.95283e+06	3.96027e+07	3.97904	0.933254	-0.0996579
VPRRPFESARLDAELk	Unambiguous	40S ribosomal protein S9 [Schizosaccharomyces pombe 972h-]	2	2	19112632;19113857	K16(Label:13C(6)15N(2))	HCD	1	0	1	1	7684			2.14856e+08	Heavy	Not Unique	Used	5.38736e+07	2.14653e+08	3.98439	0.933741	-0.0989058
RIQRGPVRGISFk	Unambiguous	40S ribosomal protein S17 [Schizosaccharomyces pombe 972h-]	2	2	19075512;19112037	K13(Label:13C(6)15N(2))	HCD	1	0	1	1	517			510732336	Heavy	Not Unique	Used	128094016	510732336	3.98717	0.933993	-0.0985161
HGYIDEFTEIDDHRSGk	Unambiguous	40S ribosomal protein S22 [Schizosaccharomyces pombe 972h-]	1	1	19114146	K17(Label:13C(6)15N(2))	HCD	1	0	1	1	3941			5.38762e+07	Heavy	Unique	Used	1.3354e+07	5.34232e+07	4.00055	0.935207	-0.0966428
FRLILIESRIHRLARYYRk	Unambiguous	40S ribosomal protein S13 [Schizosaccharomyces pombe 972h-]	1	1	19114812	K19(Label:13C(6)15N(2))	HCD	1	0	1	1	2594			8.20792e+06	Heavy	Unique	Used	2.05016e+06	8.20792e+06	4.00356	0.935478	-0.0962238
TDASAVQAFGLRTHYGGGRTTGFALIYDDVEAMk	Unambiguous	40S ribosomal protein S24 [Schizosaccharomyces pombe 972h-]	1	1	19115165	K34(Label:13C(6)15N(2))	HCD	1	0	1	1	5146			3.35659e+06	Heavy	Unique	Used	527447	2.11757e+06	4.01475	0.936488	-0.0946671
RALVHDGLARGIREASk	Unambiguous	40S ribosomal protein S12 [Schizosaccharomyces pombe 972h-]	2	1	19111998	K17(Label:13C(6)15N(2))	HCD	1	0	1	1	547			3.44787e+08	Heavy	Unique	Used	79744610	320542446	4.01961	0.936926	-0.0939932
DALDREFATRLSNVFVIGETGk	Unambiguous	40S ribosomal protein S4 [Schizosaccharomyces pombe 972h-]	2	1	19113142	K22(Label:13C(6)15N(2))	HCD	1	0	1	1	7198			1.57179e+08	Heavy	Unique	Used	3.74125e+07	150542303	4.02385	0.937307	-0.0934064
RRSDGIHIINLGk	Unambiguous	40S ribosomal protein S0B [Schizosaccharomyces pombe 972h-]	1	1	19115325	K13(Label:13C(6)15N(2))	HCD	1	0	1	1	3237			5.99924e+07	Heavy	Unique	Used	1.45302e+07	58491300	4.02549	0.937454	-0.0931804
WQTTIEADQTIk	Unambiguous	40S ribosomal protein S1 [Schizosaccharomyces pombe 972h-]	1	1	19114028	K12(Label:13C(6)15N(2))	HCD	1	0	1	1	1653			7.48014e+07	Heavy	Unique	Used	1.8578e+07	7.48014e+07	4.02633	0.93753	-0.0930635
AnGLAPELPEDLYNLIk	Unambiguous	40S ribosomal protein S13 [Schizosaccharomyces pombe 972h-]	1	1	19114812	N2(Deamidated); K17(Label:13C(6)15N(2))	HCD	1	0	1	1	7443			968409466	Heavy	Unique	Used	237793386	958838262	4.03223	0.938059	-0.0922498
MTTPQWIDIVk	Unambiguous	40S ribosomal protein S19 [Schizosaccharomyces pombe 972h-]	2	2	19113385;19112013	K11(Label:13C(6)15N(2))	HCD	1	0	1	1	2158			1.61283e+06	Heavy	Not Unique	Used	399659	1.61283e+06	4.03551	0.938353	-0.0917979
AILmQRLIk	Unambiguous	40S ribosomal protein S4 [Schizosaccharomyces pombe 972h-]	2	1	19113142	M4(Oxidation); K9(Label:13C(6)15N(2))	HCD	1	0	1	1	1115			4.40136e+07	Heavy	Unique	Used	1.07452e+07	4.34488e+07	4.04357	0.939073	-0.0906913
RLFEGNAIIRRLVRLGILDETRMk	Unambiguous	40S ribosomal protein S9 [Schizosaccharomyces pombe 972h-]	1	1	19113857	K24(Label:13C(6)15N(2))	HCD	1	0	1	1	7920			5.84422e+07	Heavy	Unique	Used	1.4444e+07	5.84422e+07	4.04612	0.939301	-0.0903411
TRIIQVAYHPSNNELVRTNTLTk	Unambiguous	40S ribosomal protein S8 [Schizosaccharomyces pombe 972h-]	2	1	19115431	K23(Label:13C(6)15N(2))	HCD	1	0	1	1	6538			8.85846e+07	Heavy	Unique	Used	2.18905e+07	8.85846e+07	4.0467	0.939352	-0.0902616
ELRPLQITSAREVEVGGGk	Unambiguous	40S ribosomal protein S7 [Schizosaccharomyces pombe 972h-]	1	1	19114589	K19(Label:13C(6)15N(2))	HCD	1	0	1	1	1635			8.15929e+08	Heavy	Unique	Used	2.01576e+08	8.15929e+08	4.04775	0.939446	-0.090118
RRSDGIHIINLGk	Unambiguous	40S ribosomal protein S0B [Schizosaccharomyces pombe 972h-]	1	1	19115325	K13(Label:13C(6)15N(2))	HCD	1	0	1	1	2450			8.03285e+07	Heavy	Unique	Used	19484892	78978044	4.0533	0.93994	-0.0893595
APAFFEVk	Unambiguous	40S ribosomal protein S1 [Schizosaccharomyces pombe 972h-]	2	2	19114028;19113740	K8(Label:13C(6)15N(2))	HCD	1	0	1	1	4198			3.95543e+08	Heavy	Not Unique	Used	96460034	391206480	4.05563	0.940148	-0.0890404
LLAGLAVRRAAYGVLRYVmEAGAk	Unambiguous	40S ribosomal protein S3 [Schizosaccharomyces pombe 972h-]	1	1	19113555	M19(Oxidation); K24(Label:13C(6)15N(2))	HCD	1	0	1	1	7953			1.52188e+08	Heavy	Unique	Used	3.7409e+07	1.51755e+08	4.05665	0.940238	-0.0889018
LLAGLAVRRAAYGVLRYVMEAGAk	Unambiguous	40S ribosomal protein S3 [Schizosaccharomyces pombe 972h-]	1	1	19113555	K24(Label:13C(6)15N(2))	HCD	1	0	1	1	7355			2.12458e+08	Heavy	Unique	Used	5.23193e+07	2.12458e+08	4.0608	0.940607	-0.0883357
TRIIQVAYHPSNNELVRTNTLTk	Unambiguous	40S ribosomal protein S8 [Schizosaccharomyces pombe 972h-]	2	1	19115431	K23(Label:13C(6)15N(2))	HCD	1	0	1	1	3756			5.14622e+09	Heavy	Unique	Used	1265132705	5.14622e+09	4.06773	0.941222	-0.0873923
HGYIDEFTEIDDHRSGk	Unambiguous	40S ribosomal protein S22 [Schizosaccharomyces pombe 972h-]	1	1	19114146	K17(Label:13C(6)15N(2))	HCD	1	0	1	1	3945			5.08439e+07	Heavy	Unique	Used	1.22143e+07	4.98302e+07	4.07967	0.942278	-0.0857751
NLEVRmENYVWk	Unambiguous	40S ribosomal protein S0B [Schizosaccharomyces pombe 972h-]	1	1	19115325	M6(Oxidation); K12(Label:13C(6)15N(2))	HCD	1	0	1	1	6599			2.08752e+06	Heavy	Unique	Used	446602	1824345	4.08494	0.942744	-0.0850624
NLEVRMDNYVWk	Unambiguous	40S ribosomal protein S0A [Schizosaccharomyces pombe 972h-]	1	1	19112932	K12(Label:13C(6)15N(2))	HCD	1	0	1	1	7849			1.2302e+07	Heavy	Unique	Used	3.01148e+06	1.2302e+07	4.08503	0.942752	-0.0850501
kDEGAAPSGFAPSFRGGFGRPQ	Unambiguous	40S ribosomal protein S10 [Schizosaccharomyces pombe 972h-]	1	1	19114930	K1(Label:13C(6)15N(2))	HCD	1	0	1	1	6579			4.94087e+06	Heavy	Unique	Used	1.09856e+06	4.48926e+06	4.08649	0.94288	-0.0848535
VNGAPLSLVQPEILRMk	Unambiguous	40S ribosomal protein S16 [Schizosaccharomyces pombe 972h-]	1	1	19112530	K17(Label:13C(6)15N(2))	HCD	1	0	1	1	4693			7.46878e+07	Heavy	Unique	Used	16964316	69368861	4.0891	0.94311	-0.0845013
FAENTVELYAEk	Unambiguous	40S ribosomal protein S3 [Schizosaccharomyces pombe 972h-]	1	1	19113555	K12(Label:13C(6)15N(2))	HCD	1	0	1	1	4111			7.74795e+08	Heavy	Unique	Used	189310557	7.74157e+08	4.08935	0.943132	-0.0844682
TRYNWGWFYYTLTNEGVEYLREYLHLPAEVVPATHk	Unambiguous	40S ribosomal protein S10 [Schizosaccharomyces pombe 972h-]	2	2	19114930;19112397	K36(Label:13C(6)15N(2))	HCD	1	0	1	1	7458			110061405	Heavy	Not Unique	Used	2.68836e+07	110061405	4.094	0.943541	-0.0838425
ELRPLQITSAREVEVGGGk	Unambiguous	40S ribosomal protein S7 [Schizosaccharomyces pombe 972h-]	1	1	19114589	K19(Label:13C(6)15N(2))	HCD	1	0	1	1	6569			8.16288e+07	Heavy	Unique	Used	1.99029e+07	8.16288e+07	4.10136	0.944188	-0.0828541
AIVVFVPQPLLK	Unambiguous	40S ribosomal protein S7 [Schizosaccharomyces pombe 972h-]	1	1	19114589		HCD	1	0	1	1	4850			8.11676e+08	Light	Unique	Used	8.11676e+08	3.33094e+09	4.10378	0.9444	-0.0825302
VFLDNRDANTVDYk	Unambiguous	40S ribosomal protein S7 [Schizosaccharomyces pombe 972h-]	1	1	19114589	K14(Label:13C(6)15N(2))	HCD	1	0	1	1	6395			2.84915e+08	Heavy	Unique	Used	69260886	2.84361e+08	4.10565	0.944564	-0.0822796
FRALRLDSGNFSWGSEGVSk	Unambiguous	40S ribosomal protein S8 [Schizosaccharomyces pombe 972h-]	2	1	19115431	K20(Label:13C(6)15N(2))	HCD	1	0	1	1	6820			2.59807e+08	Heavy	Unique	Used	6.25793e+07	2.5751e+08	4.11494	0.945377	-0.0810388
DALDREFATRLSNVFVIGETGk	Unambiguous	40S ribosomal protein S4 [Schizosaccharomyces pombe 972h-]	2	1	19113142	K22(Label:13C(6)15N(2))	HCD	1	0	1	1	4929			7.7176e+07	Heavy	Unique	Used	1.86485e+07	7.6838e+07	4.12033	0.945847	-0.0803205
SIEEIYLYSLPIk	Unambiguous	40S ribosomal protein S2 [Schizosaccharomyces pombe 972h-]	1	1	19075935	K13(Label:13C(6)15N(2))	HCD	1	0	1	1	4975			9.00342e+08	Heavy	Unique	Used	2.17935e+08	898593804	4.12322	0.946099	-0.0799367
HGYIDEFTEIDDHRSGk	Unambiguous	40S ribosomal protein S22 [Schizosaccharomyces pombe 972h-]	1	1	19114146	K17(Label:13C(6)15N(2))	HCD	1	0	1	1	1672			2.21717e+07	Heavy	Unique	Used	5.22325e+06	2.15427e+07	4.12438	0.9462	-0.0797824
EYQIVDYFLPRLNDEVMk	Unambiguous	40S ribosomal protein S2 [Schizosaccharomyces pombe 972h-]	1	1	19075935	K18(Label:13C(6)15N(2))	HCD	1	0	1	1	7352			5.11275e+08	Heavy	Unique	Used	1.23893e+08	5.11205e+08	4.12619	0.946358	-0.0795425
QGEQDIPGLTDVTVPk	Unambiguous	40S ribosomal protein S6 [Schizosaccharomyces pombe 972h-]	2	1	19113745	K16(Label:13C(6)15N(2))	HCD	1	0	1	1	2019			4.36933e+06	Heavy	Unique	Used	1.05881e+06	4.36933e+06	4.12664	0.946397	-0.0794822
TRIIQVAYHPSNNELVRTNTLTk	Unambiguous	40S ribosomal protein S8 [Schizosaccharomyces pombe 972h-]	2	1	19115431	K23(Label:13C(6)15N(2))	HCD	1	0	1	1	6536			1.76976e+08	Heavy	Unique	Used	4.28807e+07	1.76976e+08	4.12717	0.946443	-0.0794121
TRIIQVAYHPSNNELVRTNTLTk	Unambiguous	40S ribosomal protein S8 [Schizosaccharomyces pombe 972h-]	2	1	19115431	K23(Label:13C(6)15N(2))	HCD	1	0	1	1	3755			2688231184	Heavy	Unique	Used	650850606	2688231184	4.13034	0.946719	-0.078992
DALDREFATRLSNVFVIGEAGk	Unambiguous	40S ribosomal protein S4 [Schizosaccharomyces pombe 972h-]	1	1	19112469	K22(Label:13C(6)15N(2))	HCD	1	0	1	1	4927			8.05552e+07	Heavy	Unique	Used	1.91963e+07	7.93477e+07	4.1335	0.946994	-0.0785732
ELRPLQITSAREVEVGGGk	Unambiguous	40S ribosomal protein S7 [Schizosaccharomyces pombe 972h-]	1	1	19114589	K19(Label:13C(6)15N(2))	HCD	1	0	1	1	6591			89594179	Heavy	Unique	Used	2.16665e+07	89594179	4.13514	0.947137	-0.0783554
LLELHGESQDVGTk	Unambiguous	40S ribosomal protein S1 [Schizosaccharomyces pombe 972h-]	1	1	19114028	K14(Label:13C(6)15N(2))	HCD	1	0	1	1	1050			3.58378e+08	Heavy	Unique	Used	8.58281e+07	355136861	4.13777	0.947365	-0.0780082
FADGFMIHSGQPAVDFIDSATRHVLLRQGVLGVk	Unambiguous	40S ribosomal protein S3 [Schizosaccharomyces pombe 972h-]	1	1	19113555	K34(Label:13C(6)15N(2))	HCD	1	0	1	1	7987			2.90262e+08	Heavy	Unique	Used	64789171	268195116	4.13951	0.947515	-0.0777788
AIHQALFSQGVLVAk	Unambiguous	40S ribosomal protein S10 [Schizosaccharomyces pombe 972h-]	1	1	19114930	K15(Label:13C(6)15N(2))	HCD	1	0	1	1	4189			1.97164e+09	Heavy	Unique	Used	4.74099e+08	1965220268	4.14517	0.948006	-0.0770312
VVQSLEK	Unambiguous	40S ribosomal protein S19 [Schizosaccharomyces pombe 972h-]	2	2	19113385;19112013		HCD	1	0	1	1	5965			2.16499e+06	Light	Not Unique	Used	2.16499e+06	8.97455e+06	4.14531	0.948019	-0.0770126
TRIIQVAYHPSNNELVRTNTLTk	Unambiguous	40S ribosomal protein S8 [Schizosaccharomyces pombe 972h-]	2	1	19115431	K23(Label:13C(6)15N(2))	HCD	1	0	1	1	1570			8.53411e+08	Heavy	Unique	Used	2.05862e+08	8.53411e+08	4.14555	0.948039	-0.076982
EYQIVDYFLPRLNDEVmK	Unambiguous	40S ribosomal protein S2 [Schizosaccharomyces pombe 972h-]	1	1	19075935	M17(Oxidation)	HCD	1	0	1	1	7281			2.60852e+08	Light	Unique	Used	2.60852e+08	1.08149e+09	4.14599	0.948077	-0.0769235
TRIIQVAYHPSNNELVRTNTLTk	Unambiguous	40S ribosomal protein S8 [Schizosaccharomyces pombe 972h-]	2	1	19115431	K23(Label:13C(6)15N(2))	HCD	1	0	1	1	1573			256134198	Heavy	Unique	Used	6.17768e+07	256134198	4.14612	0.948088	-0.0769064
FADGFMIHSGQPAVDFIDSATRHVLLRQGVLGVk	Unambiguous	40S ribosomal protein S3 [Schizosaccharomyces pombe 972h-]	1	1	19113555	K34(Label:13C(6)15N(2))	HCD	1	0	1	1	7986			344801445	Heavy	Unique	Used	8.26983e+07	3.43027e+08	4.14793	0.948245	-0.0766683
FELGRQPSNTRIGPk	Unambiguous	40S ribosomal protein S8 [Schizosaccharomyces pombe 972h-]	2	1	19115431	K15(Label:13C(6)15N(2))	HCD	1	0	1	1	948			3.29379e+08	Heavy	Unique	Used	7.93344e+07	3.29379e+08	4.15178	0.948578	-0.0761611
GRILEVSLADLQk	Unambiguous	40S ribosomal protein S1 [Schizosaccharomyces pombe 972h-]	2	2	19114028;19113740	K13(Label:13C(6)15N(2))	HCD	1	0	1	1	2009			2.40936e+07	Heavy	Not Unique	Used	5.74343e+06	2.38683e+07	4.15576	0.948922	-0.0756388
LAGEYGLRNk	Unambiguous	40S ribosomal protein S9 [Schizosaccharomyces pombe 972h-]	2	2	19112632;19113857	K10(Label:13C(6)15N(2))	HCD	1	0	1	1	6023			1.06007e+07	Heavy	Not Unique	Used	2.519e+06	1.04701e+07	4.15647	0.948983	-0.0755463
HEIWRVALTLSK	Unambiguous	40S ribosomal protein S9 [Schizosaccharomyces pombe 972h-]	2	2	19112632;19113857		HCD	1	0	1	1	6737			5.17933e+07	Light	Not Unique	Used	5.17933e+07	2.15289e+08	4.15668	0.949001	-0.0755178
EWVPVTK	Unambiguous	40S ribosomal protein S2 [Schizosaccharomyces pombe 972h-]	1	1	19075935		HCD	1	0	1	1	1291			31375498	Light	Unique	Used	31375498	130498140	4.15924	0.949222	-0.075183
LNLETNk	Unambiguous	40S ribosomal protein S4 [Schizosaccharomyces pombe 972h-]	3	2	19112469;19113142	K7(Label:13C(6)15N(2))	HCD	1	0	1	1	675			2.53496e+08	Heavy	Not Unique	Used	6.07921e+07	252852545	4.1593	0.949227	-0.0751749
TRYNWGWFYYTLTNEGVEYLREYLHLPAEVVPATHk	Unambiguous	40S ribosomal protein S10 [Schizosaccharomyces pombe 972h-]	2	2	19114930;19112397	K36(Label:13C(6)15N(2))	HCD	1	0	1	1	7457			2.08075e+08	Heavy	Not Unique	Used	4.85912e+07	202163095	4.16049	0.94933	-0.0750188
LLELHGESQDVGSk	Unambiguous	40S ribosomal protein S1 [Schizosaccharomyces pombe 972h-]	1	1	19113740	K14(Label:13C(6)15N(2))	HCD	1	0	1	1	972			3.50111e+08	Heavy	Unique	Used	8.39835e+07	349832251	4.16549	0.94976	-0.0743647
INVDQDTk	Unambiguous	40S ribosomal protein S17 [Schizosaccharomyces pombe 972h-]	1	1	19075512	K8(Label:13C(6)15N(2))	HCD	1	0	1	1	2780			4.06858e+08	Heavy	Unique	Used	9.76204e+07	4.06858e+08	4.16775	0.949955	-0.0740688
FRALRLDSGNFSWGSEGVSK	Unambiguous	40S ribosomal protein S8 [Schizosaccharomyces pombe 972h-]	2	1	19115431		HCD	1	0	1	1	4391			3.1591e+08	Light	Unique	Used	3.1591e+08	1.31849e+09	4.17363	0.95046	-0.0733019
QLEDGRTLSDYNIQk	Unambiguous	ubiquitin-40S ribosomal protein S31 fusion protein [Schizosaccharomyces pombe 972h-]	4	1	19114970	K15(Label:13C(6)15N(2))	HCD	1	0	1	1	1393			4.51727e+07	Heavy	Unique	Used	1.01911e+07	42536106	4.17383	0.950477	-0.0732762
FELGRQPSNTRIGPk	Unambiguous	40S ribosomal protein S8 [Schizosaccharomyces pombe 972h-]	2	1	19115431	K15(Label:13C(6)15N(2))	HCD	1	0	1	1	3181			3592985706	Heavy	Unique	Used	803655440	3355037312	4.17472	0.950554	-0.0731599
TRIIQVAYHPSnNELVRTNTLTk	Unambiguous	40S ribosomal protein S8 [Schizosaccharomyces pombe 972h-]	2	1	19115431	N12(Deamidated); K23(Label:13C(6)15N(2))	HCD	0.1538	0	1	1	3919			2.56022e+08	Heavy	Unique	Used	6.10578e+07	2.55058e+08	4.17732	0.950776	-0.0728219
RLFEGNAIIRRLVRLGILDESRmk	Unambiguous	40S ribosomal protein S9 [Schizosaccharomyces pombe 972h-]	1	1	19112632	M23(Oxidation); K24(Label:13C(6)15N(2))	HCD	1	0	1	1	5778			2.17027e+08	Heavy	Unique	Used	5.19484e+07	2.17027e+08	4.17774	0.950812	-0.0727673
FVDEHSk	Unambiguous	40S ribosomal protein S16 [Schizosaccharomyces pombe 972h-]	1	1	19112530	K7(Label:13C(6)15N(2))	HCD	1	0	1	1	5896			6.6214e+06	Heavy	Unique	Used	1.58486e+06	6.6214e+06	4.1779	0.950826	-0.0727462
RLFEGNAIIRRLVRLGILDETRMk	Unambiguous	40S ribosomal protein S9 [Schizosaccharomyces pombe 972h-]	1	1	19113857	K24(Label:13C(6)15N(2))	HCD	1	0	1	1	4772			6.85771e+07	Heavy	Unique	Used	1.5925e+07	6.65501e+07	4.17896	0.950917	-0.072608
VFLDNRDANTVDYk	Unambiguous	40S ribosomal protein S7 [Schizosaccharomyces pombe 972h-]	1	1	19114589	K14(Label:13C(6)15N(2))	HCD	1	0	1	1	1367			1.39943e+09	Heavy	Unique	Used	3.34616e+08	1.39943e+09	4.1822	0.951195	-0.0721871
FELGRQPSNTRIGPk	Unambiguous	40S ribosomal protein S8 [Schizosaccharomyces pombe 972h-]	2	1	19115431	K15(Label:13C(6)15N(2))	HCD	1	0	1	1	949			1.58997e+09	Heavy	Unique	Used	3.79868e+08	1589388096	4.18405	0.951354	-0.0719465
LRVEDIQGk	Unambiguous	40S ribosomal protein S1 [Schizosaccharomyces pombe 972h-]	2	2	19114028;19113740	K9(Label:13C(6)15N(2))	HCD	1	0	1	1	614			8.71479e+08	Heavy	Not Unique	Used	2.07748e+08	870174103	4.18861	0.951743	-0.0713555
TGEHFRLVYDIk	Unambiguous	40S ribosomal protein S4 [Schizosaccharomyces pombe 972h-]	3	2	19112469;19113142	K12(Label:13C(6)15N(2))	HCD	1	0	1	1	1702			5.28182e+07	Heavy	Not Unique	Used	12075764	50646327	4.19405	0.952208	-0.0706519
RVVDPFSRk	Unambiguous	40S ribosomal protein S1 [Schizosaccharomyces pombe 972h-]	2	2	19114028;19113740	K9(Label:13C(6)15N(2))	HCD	1	0	1	1	580			439045508	Heavy	Not Unique	Used	1.04666e+08	439045508	4.19474	0.952267	-0.0705622
ATNNIYPLQNVFVRk	Unambiguous	40S ribosomal protein S1 [Schizosaccharomyces pombe 972h-]	1	1	19113740	K15(Label:13C(6)15N(2))	HCD	1	0	1	1	2045			2.23616e+07	Heavy	Unique	Used	5.27217e+06	2.21161e+07	4.19486	0.952277	-0.0705462
TTYAQSSQIRAIRQk	Unambiguous	40S ribosomal protein S1 [Schizosaccharomyces pombe 972h-]	1	1	19114028	K15(Label:13C(6)15N(2))	HCD	1	0	1	1	343			5.99354e+07	Heavy	Unique	Used	1.30873e+07	54901730	4.19503	0.952291	-0.0705255
SWISLPk	Unambiguous	40S ribosomal protein S4 [Schizosaccharomyces pombe 972h-]	3	2	19112469;19113142	K7(Label:13C(6)15N(2))	HCD	1	0	1	1	4400			2.61909e+08	Heavy	Not Unique	Used	62176327	260868265	4.19562	0.952342	-0.0704485
NLLAADSHIGSk	Unambiguous	40S ribosomal protein S0B [Schizosaccharomyces pombe 972h-]	1	1	19115325	K12(Label:13C(6)15N(2))	HCD	1	0	1	1	993			4.10565e+08	Heavy	Unique	Used	9.78262e+07	4.10565e+08	4.19688	0.95245	-0.0702854
RLFEGNAIIRRLVRLGILDETRMk	Unambiguous	40S ribosomal protein S9 [Schizosaccharomyces pombe 972h-]	1	1	19113857	K24(Label:13C(6)15N(2))	HCD	1	0	1	1	4776			3.53432e+07	Heavy	Unique	Used	8.38684e+06	3.52184e+07	4.19925	0.952651	-0.0699802
VnGAPLSLVQPEILRmk	Unambiguous	40S ribosomal protein S16 [Schizosaccharomyces pombe 972h-]	1	1	19112530	N2(Deamidated); M16(Oxidation); K17(Label:13C(6)15N(2))	HCD	0.6667	0	1	1	4533			34655188	Heavy	Unique	Used	8.24858e+06	34655188	4.20135	0.95283	-0.0697087
THLRNMIILPEMVGSVVGIYNGk	Unambiguous	40S ribosomal protein S15 [Schizosaccharomyces pombe 972h-]	2	1	19075461	K23(Label:13C(6)15N(2))	HCD	1	0	1	1	7244			6.60907e+07	Heavy	Unique	Used	15670282	6.58418e+07	4.2017	0.95286	-0.0696638
AFVVIGDSDGHVGLGIk	Unambiguous	40S ribosomal protein S2 [Schizosaccharomyces pombe 972h-]	1	1	19075935	K17(Label:13C(6)15N(2))	HCD	1	0	1	1	6886			6.88162e+07	Heavy	Unique	Used	1.63747e+07	6.88162e+07	4.20258	0.952935	-0.06955
ImLPEPk	Unambiguous	40S ribosomal protein S3 [Schizosaccharomyces pombe 972h-]	1	1	19113555	M2(Oxidation); K7(Label:13C(6)15N(2))	HCD	1	0	1	1	6355			6.5389e+06	Heavy	Unique	Used	1.51705e+06	6.38021e+06	4.20568	0.953199	-0.069151
FPFEGVEVk	Unambiguous	40S ribosomal protein S5 [Schizosaccharomyces pombe 972h-]	2	1	19115124	K9(Label:13C(6)15N(2))	HCD	1	0	1	1	4381			1.3303e+09	Heavy	Unique	Used	316086309	1329386014	4.20577	0.953206	-0.0691398
FPFEGVEVk	Unambiguous	40S ribosomal protein S5 [Schizosaccharomyces pombe 972h-]	2	1	19115124	K9(Label:13C(6)15N(2))	HCD	1	0	1	1	4577			205601015	Heavy	Unique	Used	4.85066e+07	204167670	4.20907	0.953486	-0.0687157
LLELHGESQDVGTK	Unambiguous	40S ribosomal protein S1 [Schizosaccharomyces pombe 972h-]	1	1	19114028		HCD	1	0	1	1	1053			1.6035e+08	Light	Unique	Used	1.6035e+08	6.75149e+08	4.21048	0.953607	-0.0685335
LRVEDIQGk	Unambiguous	40S ribosomal protein S1 [Schizosaccharomyces pombe 972h-]	2	2	19114028;19113740	K9(Label:13C(6)15N(2))	HCD	1	0	1	1	2969			1.38129e+08	Heavy	Not Unique	Used	3.2361e+07	136316773	4.21237	0.953767	-0.068291
ELRPLQITSAREVEVGGGk	Unambiguous	40S ribosomal protein S7 [Schizosaccharomyces pombe 972h-]	1	1	19114589	K19(Label:13C(6)15N(2))	HCD	1	0	1	1	1628			1.19077e+09	Heavy	Unique	Used	2.8249e+08	1.19052e+09	4.21439	0.953938	-0.0680324
VFLDNRDANTVDYk	Unambiguous	40S ribosomal protein S7 [Schizosaccharomyces pombe 972h-]	1	1	19114589	K14(Label:13C(6)15N(2))	HCD	1	0	1	1	3524			4844237612	Heavy	Unique	Used	1149174306	4844237612	4.21541	0.954025	-0.0679016
EYQIVDYFLPRLNDEVMk	Unambiguous	40S ribosomal protein S2 [Schizosaccharomyces pombe 972h-]	1	1	19075935	K18(Label:13C(6)15N(2))	HCD	1	0	1	1	5091			1.31597e+08	Heavy	Unique	Used	3.1209e+07	1.31597e+08	4.21663	0.954128	-0.0677452
RTRQATDGRK	Unambiguous	40S ribosomal protein S7 [Schizosaccharomyces pombe 972h-]	1	1	19114589		HCD	1	0	1	1	1			9.48747e+07	Light	Unique	Used	9.48747e+07	4.00262e+08	4.21885	0.954316	-0.0674611
RALVHDGLARGIREASk	Unambiguous	40S ribosomal protein S12 [Schizosaccharomyces pombe 972h-]	2	1	19111998	K17(Label:13C(6)15N(2))	HCD	1	0	1	1	532			1.17527e+09	Heavy	Unique	Used	278516703	1.17527e+09	4.21973	0.954391	-0.0673479
TRIIQVAYHPSNNELVRTNTLTk	Unambiguous	40S ribosomal protein S8 [Schizosaccharomyces pombe 972h-]	2	1	19115431	K23(Label:13C(6)15N(2))	HCD	1	0	1	1	3751			1436355102	Heavy	Unique	Used	3.40016e+08	1436355102	4.22438	0.954784	-0.0667532
ELRPLQITSAREVEVGGGk	Unambiguous	40S ribosomal protein S7 [Schizosaccharomyces pombe 972h-]	1	1	19114589	K19(Label:13C(6)15N(2))	HCD	1	0	1	1	3880			4.35989e+09	Heavy	Unique	Used	1.03117e+09	4.35989e+09	4.22811	0.9551	-0.0662764
HEIWRVALTLSk	Unambiguous	40S ribosomal protein S9 [Schizosaccharomyces pombe 972h-]	2	2	19112632;19113857	K12(Label:13C(6)15N(2))	HCD	1	0	1	1	4213			1185997619	Heavy	Not Unique	Used	280436443	1185997619	4.22911	0.955184	-0.0661487
APAFFEVk	Unambiguous	40S ribosomal protein S1 [Schizosaccharomyces pombe 972h-]	2	2	19114028;19113740	K8(Label:13C(6)15N(2))	HCD	1	0	1	1	6755			2.65753e+07	Heavy	Not Unique	Used	6.21451e+06	26300640	4.23214	0.95544	-0.0657635
TLGNFVK	Unambiguous	40S ribosomal protein S2 [Schizosaccharomyces pombe 972h-]	1	1	19075935		HCD	1	0	1	1	3371			162793364	Light	Unique	Used	162793364	688999136	4.23235	0.955458	-0.0657357
GRRIRELTALVQk	Unambiguous	40S ribosomal protein S3 [Schizosaccharomyces pombe 972h-]	1	1	19113555	K13(Label:13C(6)15N(2))	HCD	1	0	1	1	2420			3.82718e+08	Heavy	Unique	Used	8.95775e+07	379388440	4.23531	0.955707	-0.0653595
IRRAARELLTLDEk	Unambiguous	40S ribosomal protein S9 [Schizosaccharomyces pombe 972h-]	2	2	19112632;19113857	K14(Label:13C(6)15N(2))	HCD	1	0	1	1	3115			2.91535e+09	Heavy	Not Unique	Used	687124082	2913927372	4.24076	0.956166	-0.0646667
THLRNmIILPEMVGSVVGIYNGk	Unambiguous	40S ribosomal protein S15 [Schizosaccharomyces pombe 972h-]	2	1	19075461	M6(Oxidation); K23(Label:13C(6)15N(2))	HCD	1	0	1	1	4817			63026464	Heavy	Unique	Used	1.48601e+07	63026464	4.24133	0.956214	-0.0645939
VGALPPTWK	Unambiguous	40S ribosomal protein S13 [Schizosaccharomyces pombe 972h-]	1	1	19114812		HCD	1	0	1	1	1709			3.22448e+06	Light	Unique	Used	3.22448e+06	1.36808e+07	4.24279	0.956337	-0.0644092
EVATAIRGAIIMGk	Unambiguous	40S ribosomal protein S2 [Schizosaccharomyces pombe 972h-]	1	1	19075935	K14(Label:13C(6)15N(2))	HCD	1	0	1	1	6648			3.73519e+06	Heavy	Unique	Used	843043	3.57727e+06	4.24328	0.956378	-0.0643468
YALnGREVk	Unambiguous	40S ribosomal protein S4 [Schizosaccharomyces pombe 972h-]	3	2	19112469;19113142	N4(Deamidated); K9(Label:13C(6)15N(2))	HCD	1	0	1	1	6083			1.68727e+06	Heavy	Not Unique	Used	372953	1.58449e+06	4.2485	0.956817	-0.0636848
FRALRLDSGNFSWGSEGVSk	Unambiguous	40S ribosomal protein S8 [Schizosaccharomyces pombe 972h-]	2	1	19115431	K20(Label:13C(6)15N(2))	HCD	1	0	1	1	4395			2.03914e+08	Heavy	Unique	Used	4.67393e+07	198626064	4.24966	0.956914	-0.0635386
EVATAIRGAIImGk	Unambiguous	40S ribosomal protein S2 [Schizosaccharomyces pombe 972h-]	1	1	19075935	M12(Oxidation); K14(Label:13C(6)15N(2))	HCD	1	0	1	1	6502			1.15565e+07	Heavy	Unique	Used	2638618	1.12147e+07	4.25023	0.956962	-0.0634663
AILmQRLIQVDGk	Unambiguous	40S ribosomal protein S4 [Schizosaccharomyces pombe 972h-]	1	1	19112469	M4(Oxidation); K13(Label:13C(6)15N(2))	HCD	1	0	1	1	5630			42580312	Heavy	Unique	Used	9.00835e+06	38291642	4.25068	0.957	-0.0634087
DISLVDYITIGnGQPLPHTAGRFQTK	Unambiguous	40S ribosomal protein S5 [Schizosaccharomyces pombe 972h-]	2	1	19115124	N12(Deamidated)	HCD	0.1308	0	1	1	7047			5.52192e+07	Light	Unique	Used	5.52192e+07	234737284	4.25101	0.957028	-0.0633676
FAENTVELYAEK	Unambiguous	40S ribosomal protein S3 [Schizosaccharomyces pombe 972h-]	1	1	19113555		HCD	1	0	1	1	4353			1.15164e+07	Light	Unique	Used	1.15164e+07	4.89692e+07	4.25214	0.957122	-0.0632248
kDEGAAPSGFAPSFRGGFGRPQ	Unambiguous	40S ribosomal protein S10 [Schizosaccharomyces pombe 972h-]	1	1	19114930	K1(Label:13C(6)15N(2))	HCD	1	0	1	1	6642			3.7078e+07	Heavy	Unique	Used	8.50701e+06	3.61774e+07	4.25266	0.957166	-0.0631595
EYQIVDYFLPRLNDEVmk	Unambiguous	40S ribosomal protein S2 [Schizosaccharomyces pombe 972h-]	1	1	19075935	M17(Oxidation); K18(Label:13C(6)15N(2))	HCD	1	0	1	1	5007			7.61701e+08	Heavy	Unique	Used	1.78952e+08	7.61294e+08	4.25418	0.957293	-0.0629671
QGEQDIPGLTDVTVPk	Unambiguous	40S ribosomal protein S6 [Schizosaccharomyces pombe 972h-]	2	1	19113745	K16(Label:13C(6)15N(2))	HCD	1	0	1	1	2603			5.31823e+07	Heavy	Unique	Used	1.24414e+07	5.29444e+07	4.25549	0.957403	-0.0628013
RLFEGNAIIRRLVRLGILDETRmk	Unambiguous	40S ribosomal protein S9 [Schizosaccharomyces pombe 972h-]	1	1	19113857	M23(Oxidation); K24(Label:13C(6)15N(2))	HCD	1	0	1	1	7018			1.83072e+08	Heavy	Unique	Used	4.27877e+07	1.82376e+08	4.26235	0.957977	-0.0619367
AFVVIGDSDGHVGLGIk	Unambiguous	40S ribosomal protein S2 [Schizosaccharomyces pombe 972h-]	1	1	19075935	K17(Label:13C(6)15N(2))	HCD	1	0	1	1	6887			2.33022e+07	Heavy	Unique	Used	5.34572e+06	2.27863e+07	4.26253	0.957992	-0.0619142
EDDVRQFVIRREVVPk	Unambiguous	40S ribosomal protein S6 [Schizosaccharomyces pombe 972h-]	2	1	19113745	K16(Label:13C(6)15N(2))	HCD	1	0	1	1	5590			1015140281	Heavy	Unique	Used	237242771	1011351780	4.26294	0.958027	-0.061862
SAIVQIDAApFRVWYETHYGILmGSk	Unambiguous	40S ribosomal protein S8 [Schizosaccharomyces pombe 972h-]	2	1	19115431	P10(Dioxidation); M23(Oxidation); K26(Label:13C(6)15N(2))	HCD	1	0	1	1	7114			1.36987e+08	Heavy	Unique	Used	3.16681e+07	135028965	4.26388	0.958106	-0.0617435
IRRAARELLTLDEk	Unambiguous	40S ribosomal protein S9 [Schizosaccharomyces pombe 972h-]	2	2	19112632;19113857	K14(Label:13C(6)15N(2))	HCD	1	0	1	1	7643			8.30199e+07	Heavy	Not Unique	Used	1.94329e+07	8.28787e+07	4.26487	0.958188	-0.0616192
APAFFEVk	Unambiguous	40S ribosomal protein S1 [Schizosaccharomyces pombe 972h-]	2	2	19114028;19113740	K8(Label:13C(6)15N(2))	HCD	1	0	1	1	1883			7.81634e+07	Heavy	Not Unique	Used	1.8302e+07	7.81634e+07	4.27076	0.95868	-0.0608788
NREEAAEFAQLMAk	Unambiguous	40S ribosomal protein S6 [Schizosaccharomyces pombe 972h-]	2	1	19113745	K14(Label:13C(6)15N(2))	HCD	1	0	1	1	1890			1.40158e+07	Heavy	Unique	Used	2.69984e+06	1.15352e+07	4.27256	0.95883	-0.0606535
LAGEYGLRNk	Unambiguous	40S ribosomal protein S9 [Schizosaccharomyces pombe 972h-]	2	2	19112632;19113857	K10(Label:13C(6)15N(2))	HCD	1	0	1	1	2890			459501828	Heavy	Not Unique	Used	106150492	453565570	4.27285	0.958855	-0.0606161
LIPEVIGREIERATGSIFPLQNVLVRk	Unambiguous	40S ribosomal protein S1 [Schizosaccharomyces pombe 972h-]	1	1	19114028	K27(Label:13C(6)15N(2))	HCD	1	0	1	1	7406			6.11997e+08	Heavy	Unique	Used	1.41929e+08	606472703	4.27308	0.958873	-0.0605877
IRRAARELLTLDEk	Unambiguous	40S ribosomal protein S9 [Schizosaccharomyces pombe 972h-]	2	2	19112632;19113857	K14(Label:13C(6)15N(2))	HCD	1	0	1	1	967			7.89654e+08	Heavy	Not Unique	Used	184434084	7.88107e+08	4.27311	0.958876	-0.0605842
SIEEIYLYSLPIk	Unambiguous	40S ribosomal protein S2 [Schizosaccharomyces pombe 972h-]	1	1	19075935	K13(Label:13C(6)15N(2))	HCD	1	0	1	1	7253			1.32919e+09	Heavy	Unique	Used	3.10365e+08	1326375322	4.27359	0.958916	-0.0605235
SAIVQIDAAPFRVWYETHYGILmGSk	Unambiguous	40S ribosomal protein S8 [Schizosaccharomyces pombe 972h-]	2	1	19115431	M23(Oxidation); K26(Label:13C(6)15N(2))	HCD	1	0	1	1	7176			9.62837e+08	Heavy	Unique	Used	2.24871e+08	961513041	4.27585	0.959104	-0.0602407
GVPFLVTHDGRTIRYPDPLIk	Unambiguous	40S ribosomal protein S4 [Schizosaccharomyces pombe 972h-]	3	2	19112469;19113142	K21(Label:13C(6)15N(2))	HCD	1	0	1	1	5719			5.06649e+08	Heavy	Not Unique	Used	117792737	503960546	4.27837	0.959314	-0.0599254
QGEQDIPGLTDVTVPK	Unambiguous	40S ribosomal protein S6 [Schizosaccharomyces pombe 972h-]	2	1	19113745		HCD	1	0	1	1	4409			1.97387e+08	Light	Unique	Used	1.97387e+08	845033326	4.2811	0.959541	-0.0595831
ATSTPNPk	Unambiguous	40S ribosomal protein S8 [Schizosaccharomyces pombe 972h-]	1	1	19115431	K8(Label:13C(6)15N(2))	HCD	1	0	1	1	2653			1.43209e+07	Heavy	Unique	Used	3.34349e+06	1.43209e+07	4.28321	0.959716	-0.0593202
TGEHFRLVYDIk	Unambiguous	40S ribosomal protein S4 [Schizosaccharomyces pombe 972h-]	3	2	19112469;19113142	K12(Label:13C(6)15N(2))	HCD	1	0	1	1	3955			378357373	Heavy	Not Unique	Used	85107371	365175016	4.29076	0.960343	-0.0583782
RWTIRNMVETAAIRDLSEASVYSEYTIPk	Unambiguous	40S ribosomal protein S26 [Schizosaccharomyces pombe 972h-]	1	1	19114834	K29(Label:13C(6)15N(2))	HCD	1	0	1	1	7976			3.86241e+07	Heavy	Unique	Used	8.88387e+06	3.81201e+07	4.29093	0.960357	-0.0583567
LDYVLALRIEDFLERRLQTQVFk	Unambiguous	40S ribosomal protein S9 [Schizosaccharomyces pombe 972h-]	2	2	19112632;19113857	K23(Label:13C(6)15N(2))	HCD	1	0	1	1	8026			4.20616e+08	Heavy	Not Unique	Used	9.79262e+07	420224104	4.29123	0.960383	-0.058319
SAIVQIDAAPFRVWYETHYGILmGSK	Unambiguous	40S ribosomal protein S8 [Schizosaccharomyces pombe 972h-]	2	1	19115431	M23(Oxidation)	HCD	1	0	1	1	7181			1.10569e+08	Light	Unique	Used	1.10569e+08	4.74481e+08	4.29126	0.960385	-0.0583154
VMFAmTQIk	Unambiguous	40S ribosomal protein S18 [Schizosaccharomyces pombe 972h-]	1	1	19113298	M5(Oxidation); K9(Label:13C(6)15N(2))	HCD	1	0	1	1	6477			4.66517e+07	Heavy	Unique	Used	1.08694e+07	4.66517e+07	4.29203	0.960449	-0.0582192
RLFEGNAIIRRLVRLGILDESRMk	Unambiguous	40S ribosomal protein S9 [Schizosaccharomyces pombe 972h-]	1	1	19112632	K24(Label:13C(6)15N(2))	HCD	1	0	1	1	7084			1.36234e+08	Heavy	Unique	Used	31731881	1.36234e+08	4.29328	0.960553	-0.0580633
NLEVRmENYVWk	Unambiguous	40S ribosomal protein S0B [Schizosaccharomyces pombe 972h-]	1	1	19115325	M6(Oxidation); K12(Label:13C(6)15N(2))	HCD	1	0	1	1	3931			86693394	Heavy	Unique	Used	2.01901e+07	86693394	4.29385	0.9606	-0.0579926
RLFEGNAIIRRLVRLGILDETRMk	Unambiguous	40S ribosomal protein S9 [Schizosaccharomyces pombe 972h-]	1	1	19113857	K24(Label:13C(6)15N(2))	HCD	1	0	1	1	7076			1.54989e+08	Heavy	Unique	Used	3.6069e+07	1.54989e+08	4.29702	0.960862	-0.057599
TTYAQSSQIRAIHQk	Unambiguous	40S ribosomal protein S1 [Schizosaccharomyces pombe 972h-]	1	1	19113740	K15(Label:13C(6)15N(2))	HCD	1	0	1	1	2852			5.60858e+07	Heavy	Unique	Used	1.22276e+07	5.2558e+07	4.29831	0.960969	-0.0574385
VFLDNRDANTVDYk	Unambiguous	40S ribosomal protein S7 [Schizosaccharomyces pombe 972h-]	1	1	19114589	K14(Label:13C(6)15N(2))	HCD	1	0	1	1	6400			34365679	Heavy	Unique	Used	7.95043e+06	3.41779e+07	4.29888	0.961016	-0.057368
LLELHGESQDVGSk	Unambiguous	40S ribosomal protein S1 [Schizosaccharomyces pombe 972h-]	1	1	19113740	K14(Label:13C(6)15N(2))	HCD	1	0	1	1	6224			9.7622e+06	Heavy	Unique	Used	2.25067e+06	9.67972e+06	4.30081	0.961176	-0.0571277
AFVVIGDSDGHVGLGIk	Unambiguous	40S ribosomal protein S2 [Schizosaccharomyces pombe 972h-]	1	1	19075935	K17(Label:13C(6)15N(2))	HCD	1	0	1	1	4479			3.42329e+08	Heavy	Unique	Used	7.9553e+07	3.42329e+08	4.30316	0.96137	-0.0568367
AILMQRLIk	Unambiguous	40S ribosomal protein S4 [Schizosaccharomyces pombe 972h-]	2	1	19113142	K9(Label:13C(6)15N(2))	HCD	1	0	1	1	1758			2.19148e+07	Heavy	Unique	Used	5.04891e+06	2.17347e+07	4.30483	0.961508	-0.05663
DELERVAk	Unambiguous	40S ribosomal protein S5 [Schizosaccharomyces pombe 972h-]	2	1	19115124	K8(Label:13C(6)15N(2))	HCD	1	0	1	1	312			1.08422e+09	Heavy	Unique	Used	2.51648e+08	1083446829	4.3054	0.961555	-0.0565588
VnGAPLSLVQPEILRMk	Unambiguous	40S ribosomal protein S16 [Schizosaccharomyces pombe 972h-]	1	1	19112530	N2(Deamidated); K17(Label:13C(6)15N(2))	HCD	1	0	1	1	2148			8.38299e+06	Heavy	Unique	Used	1.82964e+06	7877830	4.30568	0.961578	-0.0565238
TRIIqVAYHPSNnELVRTNTLTk	Unambiguous	40S ribosomal protein S8 [Schizosaccharomyces pombe 972h-]	2	1	19115431	Q5(Deamidated); N13(Deamidated); K23(Label:13C(6)15N(2))	HCD	0.04	0	1	1	3879			28888920	Heavy	Unique	Used	6.70919e+06	28888920	4.30587	0.961594	-0.0565003
GVPFLVTHDGRTIRYPDPLIk	Unambiguous	40S ribosomal protein S4 [Schizosaccharomyces pombe 972h-]	3	2	19112469;19113142	K21(Label:13C(6)15N(2))	HCD	1	0	1	1	7846			159747628	Heavy	Not Unique	Used	3.70854e+07	159747628	4.30756	0.961733	-0.0562915
IRRAARELLTLDEk	Unambiguous	40S ribosomal protein S9 [Schizosaccharomyces pombe 972h-]	2	2	19112632;19113857	K14(Label:13C(6)15N(2))	HCD	1	0	1	1	2433			9.26126e+08	Heavy	Not Unique	Used	214533667	924608770	4.30985	0.961922	-0.0560076
SLPDIVVVLDPk	Unambiguous	40S ribosomal protein S3 [Schizosaccharomyces pombe 972h-]	1	1	19113555	K12(Label:13C(6)15N(2))	HCD	1	0	1	1	4879			2.79569e+08	Heavy	Unique	Used	6.48299e+07	2.79569e+08	4.31235	0.962128	-0.0556994
TRIIQVAYHPSNNELVRTNTLTK	Unambiguous	40S ribosomal protein S8 [Schizosaccharomyces pombe 972h-]	2	1	19115431		HCD	1	0	1	1	1574			3.35193e+07	Light	Unique	Used	3.35193e+07	1.44577e+08	4.31324	0.962201	-0.0555894
AILmQRLIQVDGk	Unambiguous	40S ribosomal protein S4 [Schizosaccharomyces pombe 972h-]	1	1	19112469	M4(Oxidation); K13(Label:13C(6)15N(2))	HCD	1	0	1	1	3963			2.41753e+07	Heavy	Unique	Used	4.89166e+06	21101118	4.31369	0.962238	-0.0555337
DELERVAK	Unambiguous	40S ribosomal protein S5 [Schizosaccharomyces pombe 972h-]	2	1	19115124		HCD	1	0	1	1	455			37633330	Light	Unique	Used	37633330	162353711	4.31409	0.962272	-0.0554836
ATSTPNPk	Unambiguous	40S ribosomal protein S8 [Schizosaccharomyces pombe 972h-]	1	1	19115431	K8(Label:13C(6)15N(2))	HCD	1	0	1	1	27			1.50537e+08	Heavy	Unique	Used	32600613	140679584	4.31524	0.962366	-0.0553417
RVAAPHHWLLDk	Unambiguous	40S ribosomal protein S4 [Schizosaccharomyces pombe 972h-]	3	2	19112469;19113142	K12(Label:13C(6)15N(2))	HCD	1	0	1	1	936			2.21461e+08	Heavy	Not Unique	Used	5.10106e+07	2.20435e+08	4.32136	0.96287	-0.0545871
VNGAPLSLVQPEILRMk	Unambiguous	40S ribosomal protein S16 [Schizosaccharomyces pombe 972h-]	1	1	19112530	K17(Label:13C(6)15N(2))	HCD	1	0	1	1	7017			4.43257e+07	Heavy	Unique	Used	8.03037e+06	34711148	4.32248	0.962962	-0.0544493
LIPEVIGREIERATGSIFPLQNVLVRk	Unambiguous	40S ribosomal protein S1 [Schizosaccharomyces pombe 972h-]	1	1	19114028	K27(Label:13C(6)15N(2))	HCD	1	0	1	1	5171			2.64859e+07	Heavy	Unique	Used	6.12692e+06	2.64859e+07	4.32287	0.962994	-0.0544017
FELGRQPSNTRIGPk	Unambiguous	40S ribosomal protein S8 [Schizosaccharomyces pombe 972h-]	2	1	19115431	K15(Label:13C(6)15N(2))	HCD	1	0	1	1	6216			56320450	Heavy	Unique	Used	1.30285e+07	56320450	4.32288	0.962995	-0.0544002
TDASAVQAFGLRTHYGGGRTTGFALIYDDVEAmk	Unambiguous	40S ribosomal protein S24 [Schizosaccharomyces pombe 972h-]	1	1	19115165	M33(Oxidation); K34(Label:13C(6)15N(2))	HCD	1	0	1	1	5846			1.38195e+07	Heavy	Unique	Used	2036561	8.80517e+06	4.32355	0.963049	-0.0543183
AHENVWFSHPRk	Unambiguous	40S ribosomal protein S29 [Schizosaccharomyces pombe 972h-]	1	1	19112005	K12(Label:13C(6)15N(2))	HCD	1	0	1	1	2887			2.77174e+07	Heavy	Unique	Used	5.35714e+06	23167851	4.32467	0.963141	-0.0541807
TRIIQVAYHPSnNELVRTNTLTk	Unambiguous	40S ribosomal protein S8 [Schizosaccharomyces pombe 972h-]	2	1	19115431	N12(Deamidated); K23(Label:13C(6)15N(2))	HCD	0.0845	0	1	1	6576			1.03563e+07	Heavy	Unique	Used	2.26393e+06	9.79496e+06	4.32654	0.963295	-0.0539506
WQSTIEANQTIk	Unambiguous	40S ribosomal protein S1 [Schizosaccharomyces pombe 972h-]	1	1	19113740	K12(Label:13C(6)15N(2))	HCD	1	0	1	1	1382			153715776	Heavy	Unique	Used	3.55271e+07	153715776	4.32672	0.96331	-0.0539285
SIHHARVLIFQRHIRVGk	Unambiguous	40S ribosomal protein S9 [Schizosaccharomyces pombe 972h-]	2	2	19112632;19113857	K18(Label:13C(6)15N(2))	HCD	1	0	1	1	5367			3.28946e+08	Heavy	Not Unique	Used	7.58275e+07	3.28485e+08	4.33201	0.963743	-0.0532792
FRALRLDSGNFSWGSEGVSk	Unambiguous	40S ribosomal protein S8 [Schizosaccharomyces pombe 972h-]	2	1	19115431	K20(Label:13C(6)15N(2))	HCD	1	0	1	1	6824			3.07331e+08	Heavy	Unique	Used	7.09357e+07	3.07331e+08	4.33252	0.963786	-0.053216
LLELHGESQDVGTK	Unambiguous	40S ribosomal protein S1 [Schizosaccharomyces pombe 972h-]	1	1	19114028		HCD	1	0	1	1	6242			7.30088e+06	Light	Unique	Used	7.30088e+06	3.16467e+07	4.33465	0.96396	-0.0529554
IPSWFLnRQk	Unambiguous	40S ribosomal protein S18 [Schizosaccharomyces pombe 972h-]	1	1	19113298	N7(Deamidated); K10(Label:13C(6)15N(2))	HCD	0.2941	0	1	1	4331			4.24237e+07	Heavy	Unique	Used	9.58538e+06	4.15594e+07	4.33571	0.964046	-0.0528257
EWVPVTK	Unambiguous	40S ribosomal protein S2 [Schizosaccharomyces pombe 972h-]	1	1	19075935		HCD	1	0	1	1	3377			2.684e+08	Light	Unique	Used	2.684e+08	1164975051	4.34045	0.964434	-0.0522454
LAGEYGLRNk	Unambiguous	40S ribosomal protein S9 [Schizosaccharomyces pombe 972h-]	2	2	19112632;19113857	K10(Label:13C(6)15N(2))	HCD	1	0	1	1	484			8.08587e+08	Heavy	Not Unique	Used	186064901	807735358	4.34115	0.964491	-0.0521598
LGSFSSVYHk	Unambiguous	40S ribosomal protein S7 [Schizosaccharomyces pombe 972h-]	1	1	19114589	K10(Label:13C(6)15N(2))	HCD	1	0	1	1	3304			1479695431	Heavy	Unique	Used	3.40711e+08	1479695431	4.34297	0.96464	-0.0519377
SAIVQIDAApFRVWYETHYGILmGSk	Unambiguous	40S ribosomal protein S8 [Schizosaccharomyces pombe 972h-]	2	1	19115431	P10(Dioxidation); M23(Oxidation); K26(Label:13C(6)15N(2))	HCD	1	0	1	1	7111			3.50314e+08	Heavy	Unique	Used	7.98949e+07	346989380	4.34307	0.964648	-0.0519249
VFLDNRDANTVDYk	Unambiguous	40S ribosomal protein S7 [Schizosaccharomyces pombe 972h-]	1	1	19114589	K14(Label:13C(6)15N(2))	HCD	1	0	1	1	3523			1707617894	Heavy	Unique	Used	392645531	1705377352	4.3433	0.964667	-0.0518969
GRRIRELTALVQk	Unambiguous	40S ribosomal protein S3 [Schizosaccharomyces pombe 972h-]	1	1	19113555	K13(Label:13C(6)15N(2))	HCD	1	0	1	1	7642			1.90036e+07	Heavy	Unique	Used	4.34545e+06	1.89015e+07	4.34973	0.965192	-0.0511126
SIHHARVLIFQRHIRVGk	Unambiguous	40S ribosomal protein S9 [Schizosaccharomyces pombe 972h-]	2	2	19112632;19113857	K18(Label:13C(6)15N(2))	HCD	1	0	1	1	5363			1379975830	Heavy	Not Unique	Used	315515077	1372517732	4.35009	0.965221	-0.0510691
GSSNSYAIk	Unambiguous	40S ribosomal protein S5 [Schizosaccharomyces pombe 972h-]	2	1	19115124	K9(Label:13C(6)15N(2))	HCD	1	0	1	1	3008			3.06901e+07	Heavy	Unique	Used	6.74335e+06	29336258	4.3504	0.965246	-0.0510309
GRRIRELTALVQk	Unambiguous	40S ribosomal protein S3 [Schizosaccharomyces pombe 972h-]	1	1	19113555	K13(Label:13C(6)15N(2))	HCD	1	0	1	1	5410			618745442	Heavy	Unique	Used	1.42171e+08	618745442	4.35211	0.965385	-0.0508231
YALnGREVk	Unambiguous	40S ribosomal protein S4 [Schizosaccharomyces pombe 972h-]	3	2	19112469;19113142	N4(Deamidated); K9(Label:13C(6)15N(2))	HCD	1	0	1	1	604			300793151	Heavy	Not Unique	Used	6.81319e+07	297257330	4.36297	0.966269	-0.0495036
VPRRPFESARLDAELk	Unambiguous	40S ribosomal protein S9 [Schizosaccharomyces pombe 972h-]	2	2	19112632;19113857	K16(Label:13C(6)15N(2))	HCD	1	0	1	1	1267			448773828	Heavy	Not Unique	Used	102845120	448773828	4.36359	0.966319	-0.0494283
VMFAMTQIk	Unambiguous	40S ribosomal protein S18 [Schizosaccharomyces pombe 972h-]	1	1	19113298	K9(Label:13C(6)15N(2))	HCD	1	0	1	1	2016			2.95814e+07	Heavy	Unique	Used	6.74097e+06	2.94171e+07	4.36393	0.966347	-0.0493873
GRILEVSLADLQk	Unambiguous	40S ribosomal protein S1 [Schizosaccharomyces pombe 972h-]	2	2	19114028;19113740	K13(Label:13C(6)15N(2))	HCD	1	0	1	1	4380			232448665	Heavy	Not Unique	Used	5.17419e+07	226085054	4.36948	0.966797	-0.0487153
WQSTIEANQTIk	Unambiguous	40S ribosomal protein S1 [Schizosaccharomyces pombe 972h-]	1	1	19113740	K12(Label:13C(6)15N(2))	HCD	1	0	1	1	3568			2.84488e+08	Heavy	Unique	Used	6.48116e+07	283209119	4.36973	0.966817	-0.0486853
NLEVRMENYVWk	Unambiguous	40S ribosomal protein S0B [Schizosaccharomyces pombe 972h-]	1	1	19115325	K12(Label:13C(6)15N(2))	HCD	1	0	1	1	4436			5.09699e+07	Heavy	Unique	Used	1.10812e+07	4.84281e+07	4.37027	0.966861	-0.048619
TTYAQSSQIRAIRQk	Unambiguous	40S ribosomal protein S1 [Schizosaccharomyces pombe 972h-]	1	1	19114028	K15(Label:13C(6)15N(2))	HCD	1	0	1	1	6019			4.36471e+06	Heavy	Unique	Used	987603	4.31698e+06	4.37117	0.966934	-0.0485112
FADGFmIHSGQPAVDFIDSATRHVLLRQGVLGVk	Unambiguous	40S ribosomal protein S3 [Schizosaccharomyces pombe 972h-]	1	1	19113555	M6(Oxidation); K34(Label:13C(6)15N(2))	HCD	1	0	1	1	5819			2.05348e+08	Heavy	Unique	Used	4.6793e+07	204543880	4.37124	0.96694	-0.0485017
QIVNVPSFVVRLDTQK	Unambiguous	40S ribosomal protein S9 [Schizosaccharomyces pombe 972h-]	1	1	19113857		HCD	1	0	1	1	4639			1.58436e+08	Light	Unique	Used	1.58436e+08	692836561	4.37297	0.967079	-0.0482938
LGSFSSVYHk	Unambiguous	40S ribosomal protein S7 [Schizosaccharomyces pombe 972h-]	1	1	19114589	K10(Label:13C(6)15N(2))	HCD	1	0	1	1	1076			8.40742e+08	Heavy	Unique	Used	191937834	839668686	4.37469	0.967219	-0.0480855
EVATAIRGAIImGk	Unambiguous	40S ribosomal protein S2 [Schizosaccharomyces pombe 972h-]	1	1	19075935	M12(Oxidation); K14(Label:13C(6)15N(2))	HCD	1	0	1	1	3741			5.53658e+08	Heavy	Unique	Used	1.26497e+08	5.53658e+08	4.37684	0.967393	-0.0478266
LGSFSSVYHK	Unambiguous	40S ribosomal protein S7 [Schizosaccharomyces pombe 972h-]	1	1	19114589		HCD	1	0	1	1	1073			1.94955e+08	Light	Unique	Used	1.94955e+08	853788167	4.37941	0.9676	-0.0475168
FELGRQPSNTRIGPk	Unambiguous	40S ribosomal protein S8 [Schizosaccharomyces pombe 972h-]	2	1	19115431	K15(Label:13C(6)15N(2))	HCD	1	0	1	1	3182			2.694e+09	Heavy	Unique	Used	6.15042e+08	2.694e+09	4.38019	0.967663	-0.0474227
SIHHARVLIFQRHIRVGk	Unambiguous	40S ribosomal protein S9 [Schizosaccharomyces pombe 972h-]	2	2	19112632;19113857	K18(Label:13C(6)15N(2))	HCD	1	0	1	1	2355			681376276	Heavy	Not Unique	Used	1.54829e+08	678279553	4.38083	0.967715	-0.0473453
RVAAPHHWLLDk	Unambiguous	40S ribosomal protein S4 [Schizosaccharomyces pombe 972h-]	3	2	19112469;19113142	K12(Label:13C(6)15N(2))	HCD	1	0	1	1	6200			1.4351e+07	Heavy	Not Unique	Used	3.2613e+06	1.42917e+07	4.3822	0.967826	-0.0471804
RAGELTTEELERIVTIIQNPSQFk	Unambiguous	40S ribosomal protein S18 [Schizosaccharomyces pombe 972h-]	1	1	19113298	K24(Label:13C(6)15N(2))	HCD	1	0	1	1	7293			6.8178e+09	Heavy	Unique	Used	1554020251	6811413716	4.38309	0.967898	-0.047073
QmVVDILHPGk	Unambiguous	40S ribosomal protein S24 [Schizosaccharomyces pombe 972h-]	2	2	19112688;19115165	M2(Oxidation); K11(Label:13C(6)15N(2))	HCD	1	0	1	1	6449			208685070	Heavy	Not Unique	Used	47601408	208685070	4.38401	0.967972	-0.0469625
EVATAIRGAIImGk	Unambiguous	40S ribosomal protein S2 [Schizosaccharomyces pombe 972h-]	1	1	19075935	M12(Oxidation); K14(Label:13C(6)15N(2))	HCD	1	0	1	1	1512			4.21733e+08	Heavy	Unique	Used	9.56001e+07	419308160	4.38607	0.968138	-0.0467154
LGSFSSVYHk	Unambiguous	40S ribosomal protein S7 [Schizosaccharomyces pombe 972h-]	1	1	19114589	K10(Label:13C(6)15N(2))	HCD	1	0	1	1	3312			1405385382	Heavy	Unique	Used	3.20362e+08	1405385382	4.38687	0.968203	-0.0466183
GSSNSYAIk	Unambiguous	40S ribosomal protein S5 [Schizosaccharomyces pombe 972h-]	2	1	19115124	K9(Label:13C(6)15N(2))	HCD	1	0	1	1	459			4.15575e+08	Heavy	Unique	Used	9.46927e+07	4.15575e+08	4.38866	0.968347	-0.0464033
RIQRGPVRGISFk	Unambiguous	40S ribosomal protein S17 [Schizosaccharomyces pombe 972h-]	2	2	19075512;19112037	K13(Label:13C(6)15N(2))	HCD	1	0	1	1	2344			4.40353e+09	Heavy	Not Unique	Used	1.00224e+09	4398979930	4.38915	0.968386	-0.0463453
RAGELTTEELERIVTIIQNPSQFk	Unambiguous	40S ribosomal protein S18 [Schizosaccharomyces pombe 972h-]	1	1	19113298	K24(Label:13C(6)15N(2))	HCD	1	0	1	1	5039			3.65926e+09	Heavy	Unique	Used	832854855	3655995194	4.38971	0.968432	-0.0462771
LIPEVIGREIERATGSIFPLQNVLVRk	Unambiguous	40S ribosomal protein S1 [Schizosaccharomyces pombe 972h-]	1	1	19114028	K27(Label:13C(6)15N(2))	HCD	1	0	1	1	7424			1.38186e+08	Heavy	Unique	Used	30540720	134125767	4.3917	0.968592	-0.0460386
RVAAPHHWLLDk	Unambiguous	40S ribosomal protein S4 [Schizosaccharomyces pombe 972h-]	3	2	19112469;19113142	K12(Label:13C(6)15N(2))	HCD	1	0	1	1	3112			5.93493e+08	Heavy	Not Unique	Used	135008554	5.93493e+08	4.39596	0.968935	-0.0455279
IMLPEPk	Unambiguous	40S ribosomal protein S3 [Schizosaccharomyces pombe 972h-]	1	1	19113555	K7(Label:13C(6)15N(2))	HCD	1	0	1	1	1329			3.09247e+08	Heavy	Unique	Used	7.00288e+07	308125524	4.39999	0.969258	-0.0450466
IRRAARELLTLDEk	Unambiguous	40S ribosomal protein S9 [Schizosaccharomyces pombe 972h-]	2	2	19112632;19113857	K14(Label:13C(6)15N(2))	HCD	1	0	1	1	6208			3.55909e+07	Heavy	Not Unique	Used	8.06301e+06	3.55037e+07	4.40328	0.969523	-0.0446529
GSSNSYAIk	Unambiguous	40S ribosomal protein S5 [Schizosaccharomyces pombe 972h-]	2	1	19115124	K9(Label:13C(6)15N(2))	HCD	1	0	1	1	2859		1	158333952	Heavy	Unique	Used	35957776	158333952	4.40333	0.969527	-0.044647
DISLVDYITIGNGQPLPHTAGRFQTk	Unambiguous	40S ribosomal protein S5 [Schizosaccharomyces pombe 972h-]	2	1	19115124	K26(Label:13C(6)15N(2))	HCD	1	0	1	1	7025			1.48723e+07	Heavy	Unique	Used	3.3748e+06	1.48723e+07	4.40686	0.969811	-0.0442251
DALDREFATRLSNVFVIGETGk	Unambiguous	40S ribosomal protein S4 [Schizosaccharomyces pombe 972h-]	2	1	19113142	K22(Label:13C(6)15N(2))	HCD	1	0	1	1	4928			2.11821e+08	Heavy	Unique	Used	4.78987e+07	2.11313e+08	4.41168	0.970196	-0.0436517
LLATRIVk	Unambiguous	40S ribosomal protein S5 [Schizosaccharomyces pombe 972h-]	2	1	19115124	K8(Label:13C(6)15N(2))	HCD	1	0	1	1	646			964996948	Heavy	Unique	Used	2.1864e+08	964996948	4.41364	0.970353	-0.0434183
TRIIQVAYHPSnNELVRTNTLTk	Unambiguous	40S ribosomal protein S8 [Schizosaccharomyces pombe 972h-]	2	1	19115431	N12(Deamidated); K23(Label:13C(6)15N(2))	HCD	0.1594	0	1	1	3935			8.19154e+07	Heavy	Unique	Used	1.50817e+07	66565632	4.41368	0.970356	-0.0434136
EWVPVTk	Unambiguous	40S ribosomal protein S2 [Schizosaccharomyces pombe 972h-]	1	1	19075935	K7(Label:13C(6)15N(2))	HCD	1	0	1	1	3527			190125470	Heavy	Unique	Used	41070076	181271184	4.4137	0.970358	-0.0434104
NREEAAEFAQLMAk	Unambiguous	40S ribosomal protein S6 [Schizosaccharomyces pombe 972h-]	2	1	19113745	K14(Label:13C(6)15N(2))	HCD	1	0	1	1	4239			243932776	Heavy	Unique	Used	39597772	174828432	4.41511	0.970471	-0.0432435
TGEHFRLVYDIk	Unambiguous	40S ribosomal protein S4 [Schizosaccharomyces pombe 972h-]	3	2	19112469;19113142	K12(Label:13C(6)15N(2))	HCD	1	0	1	1	6610			2.73559e+07	Heavy	Not Unique	Used	5.99047e+06	2.64526e+07	4.41578	0.970524	-0.0431636
LIEIDDDRRLRVFMEk	Unambiguous	40S ribosomal protein S6 [Schizosaccharomyces pombe 972h-]	2	1	19113745	K16(Label:13C(6)15N(2))	HCD	1	0	1	1	5705			1.54295e+08	Heavy	Unique	Used	3.46837e+07	153229633	4.41792	0.970695	-0.0429095
LQEEERERK	Unambiguous	40S ribosomal protein S17 [Schizosaccharomyces pombe 972h-]	2	2	19075512;19112037		HCD	1	0	1	1	5883			2.18949e+07	Light	Not Unique	Used	2.18949e+07	9.67371e+07	4.41824	0.970721	-0.0428709
AFVVIGDSDGHVGLGIk	Unambiguous	40S ribosomal protein S2 [Schizosaccharomyces pombe 972h-]	1	1	19075935	K17(Label:13C(6)15N(2))	HCD	1	0	1	1	2050			8.41185e+06	Heavy	Unique	Used	1.90276e+06	8.41185e+06	4.42086	0.97093	-0.0425607
RRSDGIHIINLGk	Unambiguous	40S ribosomal protein S0B [Schizosaccharomyces pombe 972h-]	1	1	19115325	K13(Label:13C(6)15N(2))	HCD	1	0	1	1	1055		1	2.92132e+07	Heavy	Unique	Used	3.54514e+06	15682321	4.42361	0.97115	-0.0422339
GRILEVSLADLQk	Unambiguous	40S ribosomal protein S1 [Schizosaccharomyces pombe 972h-]	2	2	19114028;19113740	K13(Label:13C(6)15N(2))	HCD	1	0	1	1	4378			3.17333e+08	Heavy	Not Unique	Used	6.94594e+07	307334200	4.42466	0.971234	-0.0421094
RmGQEVPGDSVGPEFAGYVFk	Unambiguous	40S ribosomal protein S6 [Schizosaccharomyces pombe 972h-]	2	1	19113745	M2(Oxidation); K21(Label:13C(6)15N(2))	HCD	0.3118	0	1	1	6916			2.69868e+08	Heavy	Unique	Used	6.09644e+07	2.69868e+08	4.42664	0.971392	-0.041875
FRLILIESRIHRLARYYRk	Unambiguous	40S ribosomal protein S13 [Schizosaccharomyces pombe 972h-]	1	1	19114812	K19(Label:13C(6)15N(2))	HCD	1	0	1	1	2582			5.14209e+08	Heavy	Unique	Used	1.15971e+08	5.13904e+08	4.43131	0.971764	-0.0413226
SAIVQIDAApFRVWYETHYGILmGSk	Unambiguous	40S ribosomal protein S8 [Schizosaccharomyces pombe 972h-]	2	1	19115431	P10(Dioxidation); M23(Oxidation); K26(Label:13C(6)15N(2))	HCD	1	0	1	1	4833			1.0648e+08	Heavy	Unique	Used	2.38506e+07	105717817	4.4325	0.971858	-0.0411826
AIVVFVPQPLLK	Unambiguous	40S ribosomal protein S7 [Schizosaccharomyces pombe 972h-]	1	1	19114589		HCD	1	0	1	1	2175			3.04524e+06	Light	Unique	Used	3.04524e+06	1.3505e+07	4.43477	0.972039	-0.0409137
RIqRGPVRGISFk	Unambiguous	40S ribosomal protein S17 [Schizosaccharomyces pombe 972h-]	2	2	19075512;19112037	Q3(Deamidated); K13(Label:13C(6)15N(2))	HCD	1	0	1	1	2358			5.376e+07	Heavy	Not Unique	Used	1.21145e+07	5.376e+07	4.43766	0.972269	-0.0405731
LIPEVIGRAIEk	Unambiguous	40S ribosomal protein S1 [Schizosaccharomyces pombe 972h-]	1	1	19113740	K12(Label:13C(6)15N(2))	HCD	1	0	1	1	4258			142254833	Heavy	Unique	Used	3.14137e+07	139415872	4.43805	0.9723	-0.0405266
NREEAAEFAQLMAk	Unambiguous	40S ribosomal protein S6 [Schizosaccharomyces pombe 972h-]	2	1	19113745	K14(Label:13C(6)15N(2))	HCD	1	0	1	1	1891			9.02101e+06	Heavy	Unique	Used	1.61771e+06	7.17987e+06	4.43828	0.972318	-0.0405003
MTTPQWIDIVk	Unambiguous	40S ribosomal protein S19 [Schizosaccharomyces pombe 972h-]	2	2	19113385;19112013	K11(Label:13C(6)15N(2))	HCD	1	0	1	1	7052			1.68558e+08	Heavy	Not Unique	Used	3.79733e+07	1.68558e+08	4.43884	0.972363	-0.0404335
FAGVDIRVRVSGGGHVSQIYAIRQAISk	Unambiguous	40S ribosomal protein S16 [Schizosaccharomyces pombe 972h-]	1	1	19112530	K28(Label:13C(6)15N(2))	HCD	1	0	1	1	6780			3.67406e+07	Heavy	Unique	Used	8.04563e+06	3.57301e+07	4.44094	0.972529	-0.0401867
AFVVIGDSDGHVGLGIk	Unambiguous	40S ribosomal protein S2 [Schizosaccharomyces pombe 972h-]	1	1	19075935	K17(Label:13C(6)15N(2))	HCD	1	0	1	1	4481			1.93818e+08	Heavy	Unique	Used	42988885	190923415	4.44123	0.972552	-0.0401527
HGRPGIGATHSSRFIPLk	Unambiguous	40S ribosomal protein S15 [Schizosaccharomyces pombe 972h-]	2	1	19075461	K18(Label:13C(6)15N(2))	HCD	1	0	1	1	640			5.10909e+07	Heavy	Unique	Used	1.09519e+07	48671647	4.44411	0.972781	-0.0398134
RVQLGAk	Unambiguous	40S ribosomal protein S4 [Schizosaccharomyces pombe 972h-]	3	2	19112469;19113142	K7(Label:13C(6)15N(2))	HCD	1	0	1	1	374			4.28784e+07	Heavy	Not Unique	Used	9.35732e+06	41590976	4.44475	0.972832	-0.0397377
kDEGAAPSGFAPSFRGGFGRPQ	Unambiguous	40S ribosomal protein S10 [Schizosaccharomyces pombe 972h-]	1	1	19114930	K1(Label:13C(6)15N(2))	HCD	1	0	1	1	4029			6194692548	Heavy	Unique	Used	1.39342e+09	6194692548	4.44567	0.972905	-0.0396295
AIHQALFSQGVLVAK	Unambiguous	40S ribosomal protein S10 [Schizosaccharomyces pombe 972h-]	1	1	19114930		HCD	1	0	1	1	4200			2.54701e+08	Light	Unique	Used	2.54701e+08	1132344358	4.44577	0.972913	-0.0396179
RAGELTTEELERIVTIIQNPSQFk	Unambiguous	40S ribosomal protein S18 [Schizosaccharomyces pombe 972h-]	1	1	19113298	K24(Label:13C(6)15N(2))	HCD	1	0	1	1	7321			6.66313e+09	Heavy	Unique	Used	1496914452	6655249374	4.44598	0.972929	-0.0395937
FITAYAAFLk	Unambiguous	40S ribosomal protein S19 [Schizosaccharomyces pombe 972h-]	1	1	19113385	K10(Label:13C(6)15N(2))	HCD	1	0	1	1	4804			5.60471e+08	Heavy	Unique	Used	1.26056e+08	5.60471e+08	4.4462	0.972947	-0.0395674
RLFEGNAIIRRLVRLGILDESRmk	Unambiguous	40S ribosomal protein S9 [Schizosaccharomyces pombe 972h-]	1	1	19112632	M23(Oxidation); K24(Label:13C(6)15N(2))	HCD	1	0	1	1	7904			259038495	Heavy	Unique	Used	58248793	259038495	4.4471	0.973018	-0.0394613
VPRRPFESARLDAELk	Unambiguous	40S ribosomal protein S9 [Schizosaccharomyces pombe 972h-]	2	2	19112632;19113857	K16(Label:13C(6)15N(2))	HCD	1	0	1	1	2491			8.51743e+08	Heavy	Not Unique	Used	1.91399e+08	8.51454e+08	4.44857	0.973134	-0.0392891
SAIVQIDAAPFRVWYETHYGILMGSk	Unambiguous	40S ribosomal protein S8 [Schizosaccharomyces pombe 972h-]	2	1	19115431	K26(Label:13C(6)15N(2))	HCD	1	0	1	1	7274			382462577	Heavy	Unique	Used	8.51415e+07	378820307	4.44931	0.973192	-0.0392029
AIVVFVPQPLLK	Unambiguous	40S ribosomal protein S7 [Schizosaccharomyces pombe 972h-]	1	1	19114589		HCD	1	0	1	1	7149			1.11469e+08	Light	Unique	Used	1.11469e+08	4.95961e+08	4.44931	0.973193	-0.0392023
QIVNVPSFVVRLDAQk	Unambiguous	40S ribosomal protein S9 [Schizosaccharomyces pombe 972h-]	1	1	19112632	K16(Label:13C(6)15N(2))	HCD	1	0	1	1	2112			7.0942e+06	Heavy	Unique	Used	1.51846e+06	6757114	4.44997	0.973245	-0.0391252
TLGNFVk	Unambiguous	40S ribosomal protein S2 [Schizosaccharomyces pombe 972h-]	1	1	19075935	K7(Label:13C(6)15N(2))	HCD	1	0	1	1	3436			224326840	Heavy	Unique	Used	5.03983e+07	224326840	4.45108	0.973333	-0.0389949
LNISYPANGTQk	Unambiguous	40S ribosomal protein S6 [Schizosaccharomyces pombe 972h-]	2	1	19113745	K12(Label:13C(6)15N(2))	HCD	1	0	1	1	1253			175560714	Heavy	Unique	Used	39440658	175560714	4.45126	0.973347	-0.0389732
TWETYEmRIHk	Unambiguous	40S ribosomal protein S20 [Schizosaccharomyces pombe 972h-]	1	1	19075936	M7(Oxidation); K11(Label:13C(6)15N(2))	HCD	1	0	1	1	6316			5.40264e+06	Heavy	Unique	Used	1.19064e+06	5.30042e+06	4.45173	0.973384	-0.0389184
RQVRPTAPRAGRPEPRERASADAGYRRAEk	Unambiguous	40S ribosomal protein S10 [Schizosaccharomyces pombe 972h-]	1	1	19114930	K30(Label:13C(6)15N(2))	HCD	1	0	1	1	2296			109556925	Heavy	Unique	Used	2.35995e+07	105068411	4.45215	0.973418	-0.0388692
LGSFSSVYHk	Unambiguous	40S ribosomal protein S7 [Schizosaccharomyces pombe 972h-]	1	1	19114589	K10(Label:13C(6)15N(2))	HCD	1	0	1	1	6261			7.71394e+07	Heavy	Unique	Used	1.73262e+07	7.71394e+07	4.45218	0.97342	-0.0388656
NLEVRmDNYVWk	Unambiguous	40S ribosomal protein S0A [Schizosaccharomyces pombe 972h-]	1	1	19112932	M6(Oxidation); K12(Label:13C(6)15N(2))	HCD	1	0	1	1	3939			8.18998e+07	Heavy	Unique	Used	1.83867e+07	8.18998e+07	4.4543	0.973588	-0.0386172
FADGFmIHSGQPAVDFIDSATRHVLLRQGVLGVk	Unambiguous	40S ribosomal protein S3 [Schizosaccharomyces pombe 972h-]	1	1	19113555	M6(Oxidation); K34(Label:13C(6)15N(2))	HCD	0.2909	0	1	1	7958			3.72319e+08	Heavy	Unique	Used	8.29214e+07	369603467	4.45727	0.973823	-0.0382688
HGRPGIGATHSSRFIPLk	Unambiguous	40S ribosomal protein S15 [Schizosaccharomyces pombe 972h-]	2	1	19075461	K18(Label:13C(6)15N(2))	HCD	1	0	1	1	637			1.75846e+09	Heavy	Unique	Used	3.94418e+08	1758133810	4.45754	0.973844	-0.038237
NREEAAEFAQLmAk	Unambiguous	40S ribosomal protein S6 [Schizosaccharomyces pombe 972h-]	2	1	19113745	M12(Oxidation); K14(Label:13C(6)15N(2))	HCD	1	0	1	1	3482			110060556	Heavy	Unique	Used	2.4682e+07	110060556	4.45914	0.97397	-0.0380502
LRVEDIQGk	Unambiguous	40S ribosomal protein S1 [Schizosaccharomyces pombe 972h-]	2	2	19114028;19113740	K9(Label:13C(6)15N(2))	HCD	1	0	1	1	739			3.94229e+07	Heavy	Not Unique	Used	7.93028e+06	35365343	4.45953	0.974001	-0.0380045
GRRIRELTALVQk	Unambiguous	40S ribosomal protein S3 [Schizosaccharomyces pombe 972h-]	1	1	19113555	K13(Label:13C(6)15N(2))	HCD	1	0	1	1	3106			1.89023e+08	Heavy	Unique	Used	4.23704e+07	1.89023e+08	4.46121	0.974134	-0.0378083
EYQIVDYFLPRLNDEVmk	Unambiguous	40S ribosomal protein S2 [Schizosaccharomyces pombe 972h-]	1	1	19075935	M17(Oxidation); K18(Label:13C(6)15N(2))	HCD	1	0	1	1	5010			1.71133e+08	Heavy	Unique	Used	3.79278e+07	1.69277e+08	4.46315	0.974287	-0.037581
FITAYAAFLk	Unambiguous	40S ribosomal protein S19 [Schizosaccharomyces pombe 972h-]	1	1	19113385	K10(Label:13C(6)15N(2))	HCD	1	0	1	1	5021			8.07241e+07	Heavy	Unique	Used	1.7701e+07	79011991	4.4637	0.97433	-0.0375174
EWVPVTk	Unambiguous	40S ribosomal protein S2 [Schizosaccharomyces pombe 972h-]	1	1	19075935	K7(Label:13C(6)15N(2))	HCD	1	0	1	1	6324			29998449	Heavy	Unique	Used	6.72045e+06	29998449	4.46375	0.974334	-0.037511
ETIVRVTGGMk	Unambiguous	40S ribosomal protein S14 [Schizosaccharomyces pombe 972h-]	1	1	19115099	K11(Label:13C(6)15N(2))	HCD	1	0	1	1	801			5.19326e+07	Heavy	Unique	Used	1.16321e+07	5.19326e+07	4.46459	0.974401	-0.0374131
SIHHARVLIFQRHIRVGk	Unambiguous	40S ribosomal protein S9 [Schizosaccharomyces pombe 972h-]	2	2	19112632;19113857	K18(Label:13C(6)15N(2))	HCD	1	0	1	1	2357			381898728	Heavy	Not Unique	Used	85491932	381898728	4.46707	0.974596	-0.0371235
ELAPYDPDWYYVRAAAIARHIYLRk	Unambiguous	40S ribosomal protein S19 [Schizosaccharomyces pombe 972h-]	2	2	19113385;19112013	K25(Label:13C(6)15N(2))	HCD	1	0	1	1	7945			3.15389e+08	Heavy	Not Unique	Used	7.04599e+07	314849265	4.46849	0.974708	-0.0369582
AnGLAPELPEDLYNLIk	Unambiguous	40S ribosomal protein S13 [Schizosaccharomyces pombe 972h-]	1	1	19114812	N2(Deamidated); K17(Label:13C(6)15N(2))	HCD	1	0	1	1	5184			823387902	Heavy	Unique	Used	1.84251e+08	823387902	4.46884	0.974735	-0.0369176
RAGELTTEELERIVTIIQNPSQFK	Unambiguous	40S ribosomal protein S18 [Schizosaccharomyces pombe 972h-]	1	1	19113298		HCD	1	0	1	1	5058			8.49057e+08	Light	Unique	Used	8.49057e+08	3796087393	4.47094	0.974901	-0.0366723
VmFAmTQIk	Unambiguous	40S ribosomal protein S18 [Schizosaccharomyces pombe 972h-]	1	1	19113298	M2(Oxidation); M5(Oxidation); K9(Label:13C(6)15N(2))	HCD	1	0	1	1	3330			1.61232e+09	Heavy	Unique	Used	3.60162e+08	1610457014	4.47147	0.974943	-0.0366105
VPRRPFESARLDAELk	Unambiguous	40S ribosomal protein S9 [Schizosaccharomyces pombe 972h-]	2	2	19112632;19113857	K16(Label:13C(6)15N(2))	HCD	1	0	1	1	5496			4.45851e+09	Heavy	Not Unique	Used	9.96663e+08	4.45851e+09	4.47344	0.975097	-0.0363819
kDEGAAPSGFAPSFRGGFGRPQ	Unambiguous	40S ribosomal protein S10 [Schizosaccharomyces pombe 972h-]	1	1	19114930	K1(Label:13C(6)15N(2))	HCD	1	0	1	1	1764			6.90739e+08	Heavy	Unique	Used	1.54377e+08	6.90739e+08	4.47437	0.975171	-0.0362731
VTAFVPHDGCLnFVDENDEVLLSGFGRk	Unambiguous	40S ribosomal protein S23 [Schizosaccharomyces pombe 972h-]	1	1	19112979	N12(Deamidated); K28(Label:13C(6)15N(2))	HCD	0.4189	0	1	1	7134			3.54466e+07	Heavy	Unique	Used	6.51193e+06	2.91376e+07	4.4745	0.975181	-0.0362582
RALVHDGLARGIREASK	Unambiguous	40S ribosomal protein S12 [Schizosaccharomyces pombe 972h-]	2	1	19111998		HCD	1	0	1	1	2899			5.3204e+08	Light	Unique	Used	5.3204e+08	2.38256e+09	4.47816	0.975468	-0.0358333
SLPDIVVVLDPk	Unambiguous	40S ribosomal protein S3 [Schizosaccharomyces pombe 972h-]	1	1	19113555	K12(Label:13C(6)15N(2))	HCD	1	0	1	1	5031			2.38346e+07	Heavy	Unique	Used	4.65999e+06	2.08796e+07	4.48061	0.975661	-0.035548
VNGAPLSLVQPEILRmk	Unambiguous	40S ribosomal protein S16 [Schizosaccharomyces pombe 972h-]	1	1	19112530	M16(Oxidation); K17(Label:13C(6)15N(2))	HCD	1	0	1	1	6893			2.37467e+07	Heavy	Unique	Used	5.29936e+06	2.37467e+07	4.48105	0.975695	-0.0354978
AIHQALFSQGVLVAk	Unambiguous	40S ribosomal protein S10 [Schizosaccharomyces pombe 972h-]	1	1	19114930	K15(Label:13C(6)15N(2))	HCD	1	0	1	1	1837			9.61514e+08	Heavy	Unique	Used	2.14384e+08	9.61307e+08	4.48403	0.975929	-0.0351512
LREDLERLK	Unambiguous	40S ribosomal protein S18 [Schizosaccharomyces pombe 972h-]	1	1	19113298		HCD	1	0	1	1	2951			7.24986e+08	Light	Unique	Used	721916291	3238249904	4.48563	0.976055	-0.0349662
RLFEGNAIIRRLVRLGILDESRmk	Unambiguous	40S ribosomal protein S9 [Schizosaccharomyces pombe 972h-]	1	1	19112632	M23(Oxidation); K24(Label:13C(6)15N(2))	HCD	1	0	1	1	4689			1.04311e+08	Heavy	Unique	Used	2.28349e+07	1.02447e+08	4.48641	0.976116	-0.0348759
DALDREFATRLSNVFVIGETGk	Unambiguous	40S ribosomal protein S4 [Schizosaccharomyces pombe 972h-]	2	1	19113142	K22(Label:13C(6)15N(2))	HCD	1	0	1	1	7201			9.32935e+07	Heavy	Unique	Used	2.06618e+07	9.27316e+07	4.48807	0.976246	-0.0346838
RLFEGNAIIRRLVRLGILDETRmk	Unambiguous	40S ribosomal protein S9 [Schizosaccharomyces pombe 972h-]	1	1	19113857	M23(Oxidation); K24(Label:13C(6)15N(2))	HCD	1	0	1	1	4697			1.03533e+08	Heavy	Unique	Used	2.25889e+07	1.01382e+08	4.48812	0.97625	-0.0346775
TRIIQVAYHPSNNELVRTNTLTk	Unambiguous	40S ribosomal protein S8 [Schizosaccharomyces pombe 972h-]	2	1	19115431	K23(Label:13C(6)15N(2))	HCD	1	0	1	1	6540			1.98081e+07	Heavy	Unique	Used	4.34049e+06	1.94879e+07	4.48979	0.97638	-0.034485
SIHHARVLIFQRHIRVGk	Unambiguous	40S ribosomal protein S9 [Schizosaccharomyces pombe 972h-]	2	2	19112632;19113857	K18(Label:13C(6)15N(2))	HCD	1	0	1	1	7608			1.38184e+07	Heavy	Not Unique	Used	3013859	13537684	4.49181	0.976539	-0.034251
VFLDNRDANTVDYk	Unambiguous	40S ribosomal protein S7 [Schizosaccharomyces pombe 972h-]	1	1	19114589	K14(Label:13C(6)15N(2))	HCD	1	0	1	1	1369			4.4672e+08	Heavy	Unique	Used	9.92263e+07	445924538	4.49401	0.976711	-0.0339965
DISLVDYITIGNGQPLPHTAGRFQTK	Unambiguous	40S ribosomal protein S5 [Schizosaccharomyces pombe 972h-]	2	1	19115124		HCD	1	0	1	1	4721			64557480	Light	Unique	Used	64557480	290127934	4.4941	0.976718	-0.0339862
INVDQDTK	Unambiguous	40S ribosomal protein S17 [Schizosaccharomyces pombe 972h-]	1	1	19075512		HCD	1	0	1	1	265			4.70635e+08	Light	Unique	Used	4.70635e+08	2115582600	4.49516	0.976801	-0.0338636
VPRRPFESARLDAELK	Unambiguous	40S ribosomal protein S9 [Schizosaccharomyces pombe 972h-]	2	2	19112632;19113857		HCD	1	0	1	1	3390			419835576	Light	Not Unique	Used	419835576	1887409760	4.49559	0.976834	-0.0338141
HEIWRVALTLSk	Unambiguous	40S ribosomal protein S9 [Schizosaccharomyces pombe 972h-]	2	2	19112632;19113857	K12(Label:13C(6)15N(2))	HCD	1	0	1	1	4215			406898122	Heavy	Not Unique	Used	8.98381e+07	404019485	4.49719	0.97696	-0.0336293
RVAAPHHWLLDk	Unambiguous	40S ribosomal protein S4 [Schizosaccharomyces pombe 972h-]	3	2	19112469;19113142	K12(Label:13C(6)15N(2))	HCD	1	0	1	1	3108			5.45537e+08	Heavy	Not Unique	Used	1.21295e+08	5.45537e+08	4.4976	0.976991	-0.0335828
mTTPQWIDIVk	Unambiguous	40S ribosomal protein S19 [Schizosaccharomyces pombe 972h-]	2	2	19113385;19112013	M1(Oxidation); K11(Label:13C(6)15N(2))	HCD	1	0	1	1	4614			3.36656e+08	Heavy	Not Unique	Used	7.4836e+07	3.36656e+08	4.49858	0.977067	-0.0334699
AIVVFVPQPLLk	Unambiguous	40S ribosomal protein S7 [Schizosaccharomyces pombe 972h-]	1	1	19114589	K12(Label:13C(6)15N(2))	HCD	1	0	1	1	5026			2.31247e+08	Heavy	Unique	Used	5.11223e+07	2.30058e+08	4.50015	0.97719	-0.0332889
HGRPGIGATHSSRFIPLk	Unambiguous	40S ribosomal protein S15 [Schizosaccharomyces pombe 972h-]	2	1	19075461	K18(Label:13C(6)15N(2))	HCD	1	0	1	1	6095			4.29814e+07	Heavy	Unique	Used	9.54593e+06	4.29814e+07	4.50259	0.977381	-0.0330077
AILmQRLIk	Unambiguous	40S ribosomal protein S4 [Schizosaccharomyces pombe 972h-]	2	1	19113142	M4(Oxidation); K9(Label:13C(6)15N(2))	HCD	1	0	1	1	1206			5.64045e+07	Heavy	Unique	Used	1.24322e+07	55992690	4.50386	0.977479	-0.0328617
TGEHFRLVYDIk	Unambiguous	40S ribosomal protein S4 [Schizosaccharomyces pombe 972h-]	3	2	19112469;19113142	K12(Label:13C(6)15N(2))	HCD	1	0	1	1	3952			2.64253e+08	Heavy	Not Unique	Used	5.8193e+07	262160184	4.50501	0.97757	-0.0327284
AIHQALFQQGVLVAK	Unambiguous	40S ribosomal protein S10 [Schizosaccharomyces pombe 972h-]	1	1	19112397		HCD	1	0	1	1	4158			2.2646e+07	Light	Unique	Used	2.2646e+07	102070934	4.50724	0.977743	-0.0324727
TVRFNVLRVVk	Unambiguous	40S ribosomal protein S11 [Schizosaccharomyces pombe 972h-]	1	1	19115584	K11(Label:13C(6)15N(2))	HCD	1	0	1	1	6565			5.6994e+07	Heavy	Unique	Used	12298099	5.54353e+07	4.50764	0.977774	-0.032427
RLLGTAYK	Unambiguous	40S ribosomal protein S23 [Schizosaccharomyces pombe 972h-]	1	1	19112979		HCD	1	0	1	1	2904			2077288716	Light	Unique	Used	2077288716	9364003113	4.5078	0.977787	-0.032408
GRILEVSLADLQk	Unambiguous	40S ribosomal protein S1 [Schizosaccharomyces pombe 972h-]	2	2	19114028;19113740	K13(Label:13C(6)15N(2))	HCD	1	0	1	1	2010			1.6667e+07	Heavy	Not Unique	Used	3.69543e+06	1.6667e+07	4.51017	0.977972	-0.0321354
RIVDEVAIIASk	Unambiguous	40S ribosomal protein S17 [Schizosaccharomyces pombe 972h-]	2	2	19075512;19112037	K12(Label:13C(6)15N(2))	HCD	1	0	1	1	4160			13455491269	Heavy	Not Unique	Used	2981785896	13448655384	4.51027	0.977979	-0.0321245
RIVDEVAIIASK	Unambiguous	40S ribosomal protein S17 [Schizosaccharomyces pombe 972h-]	2	2	19075512;19112037		HCD	1	0	1	1	1816			5.00473e+08	Light	Not Unique	Used	5.00473e+08	2257609015	4.51096	0.978033	-0.0320457
AILmQRLIQVDGk	Unambiguous	40S ribosomal protein S4 [Schizosaccharomyces pombe 972h-]	1	1	19112469	M4(Oxidation); K13(Label:13C(6)15N(2))	HCD	1	0	1	1	7766		1	1.07559e+06	Heavy	Unique	Used	169575	765257	4.51279	0.978175	-0.0318349
EVGITALHIk	Unambiguous	40S ribosomal protein S14 [Schizosaccharomyces pombe 972h-]	1	1	19115099	K10(Label:13C(6)15N(2))	HCD	1	0	1	1	3850			5.11743e+07	Heavy	Unique	Used	1.07044e+07	48332077	4.51517	0.978361	-0.0315618
RLFEGNAIIRRLVRLGILDESRmk	Unambiguous	40S ribosomal protein S9 [Schizosaccharomyces pombe 972h-]	1	1	19112632	M23(Oxidation); K24(Label:13C(6)15N(2))	HCD	1	0	1	1	7000			129702338	Heavy	Unique	Used	2.87162e+07	129702338	4.5167	0.978479	-0.0313867
FRLILIESRIHRLARYYRk	Unambiguous	40S ribosomal protein S13 [Schizosaccharomyces pombe 972h-]	1	1	19114812	K19(Label:13C(6)15N(2))	HCD	1	0	1	1	7811			7.02854e+09	Heavy	Unique	Used	1554017333	7025387463	4.52079	0.978797	-0.0309186
RPRSRTLTAVHNAILEDIVFPTEIIGk	Unambiguous	40S ribosomal protein S7 [Schizosaccharomyces pombe 972h-]	1	1	19114589	K27(Label:13C(6)15N(2))	HCD	1	0	1	1	4734			2.35777e+08	Heavy	Unique	Used	5.21513e+07	2.35777e+08	4.52103	0.978815	-0.0308916
RRSDGVHILNLGk	Unambiguous	40S ribosomal protein S0A [Schizosaccharomyces pombe 972h-]	1	1	19112932	K13(Label:13C(6)15N(2))	HCD	1	0	1	1	3116		1	8.89611e+07	Heavy	Unique	Used	9875467	44716632	4.52805	0.97936	-0.0300891
LLELHGESQDVGSk	Unambiguous	40S ribosomal protein S1 [Schizosaccharomyces pombe 972h-]	1	1	19113740	K14(Label:13C(6)15N(2))	HCD	1	0	1	1	973			2.31815e+08	Heavy	Unique	Used	5.11874e+07	2.31815e+08	4.52874	0.979413	-0.0300105
FADGFmIHSGQPAVDFIDSATRHVLLRQGVLGVk	Unambiguous	40S ribosomal protein S3 [Schizosaccharomyces pombe 972h-]	1	1	19113555	M6(Oxidation); K34(Label:13C(6)15N(2))	HCD	1	0	1	1	7956			4.31305e+08	Heavy	Unique	Used	9.45794e+07	4.2847e+08	4.53027	0.979532	-0.0298359
ELRPLQITSAREVEVGGGk	Unambiguous	40S ribosomal protein S7 [Schizosaccharomyces pombe 972h-]	1	1	19114589	K19(Label:13C(6)15N(2))	HCD	1	0	1	1	1636			8.57481e+07	Heavy	Unique	Used	1.89226e+07	8.57481e+07	4.53152	0.979628	-0.0296935
VPRRPFESARLDAELk	Unambiguous	40S ribosomal protein S9 [Schizosaccharomyces pombe 972h-]	2	2	19112632;19113857	K16(Label:13C(6)15N(2))	HCD	1	0	1	1	6370			5.11751e+07	Heavy	Not Unique	Used	1.10817e+07	5.02716e+07	4.53647	0.980011	-0.0291306
QMVVDILHPGk	Unambiguous	40S ribosomal protein S24 [Schizosaccharomyces pombe 972h-]	2	2	19112688;19115165	K11(Label:13C(6)15N(2))	HCD	1	0	1	1	6704			4.51268e+07	Heavy	Not Unique	Used	9.94451e+06	4.51268e+07	4.53786	0.980118	-0.0289724
NREEAAEFAQLmAk	Unambiguous	40S ribosomal protein S6 [Schizosaccharomyces pombe 972h-]	2	1	19113745	M12(Oxidation); K14(Label:13C(6)15N(2))	HCD	1	0	1	1	6434			3.98683e+07	Heavy	Unique	Used	8.7852e+06	3.98683e+07	4.53812	0.980138	-0.0289428
kDDGAAPGGFAPSFRGGFGRPVAA	Unambiguous	40S ribosomal protein S10 [Schizosaccharomyces pombe 972h-]	1	1	19112397	K1(Label:13C(6)15N(2))	HCD	1	0	1	1	1845			268807062	Heavy	Unique	Used	5.9218e+07	268807062	4.53928	0.980228	-0.0288105
YYPRLTLDFQTNk	Unambiguous	40S ribosomal protein S17 [Schizosaccharomyces pombe 972h-]	2	2	19075512;19112037	K13(Label:13C(6)15N(2))	HCD	1	0	1	1	6839			2.24481e+09	Heavy	Not Unique	Used	494287853	2.24381e+09	4.53947	0.980243	-0.0287887
AIHQALFSQGVLVAk	Unambiguous	40S ribosomal protein S10 [Schizosaccharomyces pombe 972h-]	1	1	19114930	K15(Label:13C(6)15N(2))	HCD	1	0	1	1	6716			4.51789e+08	Heavy	Unique	Used	9.94833e+07	4.51789e+08	4.54136	0.980388	-0.0285751
RIVDEVAIIASK	Unambiguous	40S ribosomal protein S17 [Schizosaccharomyces pombe 972h-]	2	2	19075512;19112037		HCD	1	0	1	1	1815			1.57857e+09	Light	Not Unique	Used	1.57857e+09	7.1722e+09	4.54349	0.980552	-0.0283334
SIHHARVLIFQRHIRVGk	Unambiguous	40S ribosomal protein S9 [Schizosaccharomyces pombe 972h-]	2	2	19112632;19113857	K18(Label:13C(6)15N(2))	HCD	1	0	1	1	7606			3.95863e+07	Heavy	Not Unique	Used	8.71152e+06	3.95863e+07	4.54413	0.980602	-0.0282598
IPSWFLNRQk	Unambiguous	40S ribosomal protein S18 [Schizosaccharomyces pombe 972h-]	1	1	19113298	K10(Label:13C(6)15N(2))	HCD	1	0	1	1	4175			2868029479	Heavy	Unique	Used	630784753	2866961679	4.54507	0.980675	-0.0281536
TPAEAIYGEYVDK	Unambiguous	40S ribosomal protein S11 [Schizosaccharomyces pombe 972h-]	1	1	19115584		HCD	1	0	1	1	4244			3.8737e+08	Light	Unique	Used	3.8737e+08	1760979781	4.54598	0.980745	-0.0280501
LAGEYGLRNk	Unambiguous	40S ribosomal protein S9 [Schizosaccharomyces pombe 972h-]	2	2	19112632;19113857	K10(Label:13C(6)15N(2))	HCD	1	0	1	1	2891			5.25283e+08	Heavy	Not Unique	Used	1.15258e+08	5.23991e+08	4.54626	0.980767	-0.0280183
HGRPGIGATHSSRFIPLk	Unambiguous	40S ribosomal protein S15 [Schizosaccharomyces pombe 972h-]	2	1	19075461	K18(Label:13C(6)15N(2))	HCD	1	0	1	1	6085			4.92041e+07	Heavy	Unique	Used	1.08211e+07	4.92041e+07	4.54704	0.980826	-0.0279305
IRRFFNLSk	Unambiguous	40S ribosomal protein S6 [Schizosaccharomyces pombe 972h-]	2	1	19113745	K9(Label:13C(6)15N(2))	HCD	1	0	1	1	3347			2.19842e+08	Heavy	Unique	Used	4.82614e+07	2.19576e+08	4.54972	0.981033	-0.0276268
LREDLERLK	Unambiguous	40S ribosomal protein S18 [Schizosaccharomyces pombe 972h-]	1	1	19113298		HCD	1	0	1	1	602			1.15425e+09	Light	Unique	Used	1.15425e+09	5253420811	4.55139	0.981161	-0.0274382
VPRRPFESARLDAELK	Unambiguous	40S ribosomal protein S9 [Schizosaccharomyces pombe 972h-]	2	2	19112632;19113857		HCD	1	0	1	1	3392			78605715	Light	Not Unique	Used	78605715	358028292	4.55474	0.981418	-0.0270597
QmVVDILHPGk	Unambiguous	40S ribosomal protein S24 [Schizosaccharomyces pombe 972h-]	2	2	19112688;19115165	M2(Oxidation); K11(Label:13C(6)15N(2))	HCD	1	0	1	1	3604			1.68638e+09	Heavy	Not Unique	Used	368748676	1679581082	4.55481	0.981424	-0.027051
FADGFMIHSGQPAVDFIDSATRHVLLRQGVLGVk	Unambiguous	40S ribosomal protein S3 [Schizosaccharomyces pombe 972h-]	1	1	19113555	K34(Label:13C(6)15N(2))	HCD	1	0	1	1	5834			184450977	Heavy	Unique	Used	4.02163e+07	1.83198e+08	4.55532	0.981463	-0.0269941
SFQLLANNVDSk	Unambiguous	40S ribosomal protein S18 [Schizosaccharomyces pombe 972h-]	1	1	19113298	K12(Label:13C(6)15N(2))	HCD	1	0	1	1	4368			6.92885e+08	Heavy	Unique	Used	151227969	689176396	4.5572	0.981608	-0.0267812
DQYVPEVSELEVDRVNVDQDTK	Unambiguous	40S ribosomal protein S17 [Schizosaccharomyces pombe 972h-]	1	1	19112037		HCD	1	0	1	1	6850			1.91808e+08	Light	Unique	Used	1.91808e+08	874146441	4.55741	0.981624	-0.0267582
FITAYAAFLk	Unambiguous	40S ribosomal protein S19 [Schizosaccharomyces pombe 972h-]	1	1	19113385	K10(Label:13C(6)15N(2))	HCD	1	0	1	1	7101			4.59647e+08	Heavy	Unique	Used	1.00832e+08	4.59647e+08	4.55855	0.981711	-0.0266291
kDEGAAPSGFAPSFRGGFGRPQ	Unambiguous	40S ribosomal protein S10 [Schizosaccharomyces pombe 972h-]	1	1	19114930	K1(Label:13C(6)15N(2))	HCD	1	0	1	1	4027			7.19544e+09	Heavy	Unique	Used	1577712510	7192572153	4.55886	0.981735	-0.0265939
IRRAARELLTLDEK	Unambiguous	40S ribosomal protein S9 [Schizosaccharomyces pombe 972h-]	2	2	19112632;19113857		HCD	1	0	1	1	3113			140254294	Light	Not Unique	Used	140254294	639520448	4.55972	0.981801	-0.0264969
FMTNRLLQRK	Unambiguous	40S ribosomal protein S24 [Schizosaccharomyces pombe 972h-]	2	2	19112688;19115165		HCD	1	0	1	1	5408			1.34872e+09	Light	Not Unique	Used	1.34872e+09	6150014782	4.55987	0.981813	-0.0264797
FADGFmIHSGQPAVDFIDSATRHVLLRQGVLGVk	Unambiguous	40S ribosomal protein S3 [Schizosaccharomyces pombe 972h-]	1	1	19113555	M6(Oxidation); K34(Label:13C(6)15N(2))	HCD	1	0	1	1	7196			1.69543e+08	Heavy	Unique	Used	36580459	166829102	4.56061	0.981869	-0.026397
INVDQDTK	Unambiguous	40S ribosomal protein S17 [Schizosaccharomyces pombe 972h-]	1	1	19075512		HCD	1	0	1	1	5961			1.60296e+07	Light	Unique	Used	1.60296e+07	73123033	4.56174	0.981956	-0.0262693
RALVHDGLARGIREASk	Unambiguous	40S ribosomal protein S12 [Schizosaccharomyces pombe 972h-]	2	1	19111998	K17(Label:13C(6)15N(2))	HCD	1	0	1	1	6032			9.28027e+07	Heavy	Unique	Used	2.02731e+07	9.25614e+07	4.56572	0.982262	-0.0258207
VmFAmTQIk	Unambiguous	40S ribosomal protein S18 [Schizosaccharomyces pombe 972h-]	1	1	19113298	M2(Oxidation); M5(Oxidation); K9(Label:13C(6)15N(2))	HCD	1	0	1	1	6271			95469806	Heavy	Unique	Used	2.09093e+07	95469806	4.56589	0.982275	-0.0258017
ADADSVVEQILk	Unambiguous	40S ribosomal protein S13 [Schizosaccharomyces pombe 972h-]	1	1	19114812	K12(Label:13C(6)15N(2))	HCD	1	0	1	1	2152			1.2725e+09	Heavy	Unique	Used	2.78683e+08	1.2725e+09	4.56612	0.982292	-0.0257756
RIQRGPVRGISFk	Unambiguous	40S ribosomal protein S17 [Schizosaccharomyces pombe 972h-]	2	2	19075512;19112037	K13(Label:13C(6)15N(2))	HCD	1	0	1	1	2901			1.56237e+10	Heavy	Not Unique	Used	3.42089e+09	15622282637	4.56673	0.982339	-0.0257073
FADGFmIHSGQPAVDFIDSATRHVLLRQGVLGVk	Unambiguous	40S ribosomal protein S3 [Schizosaccharomyces pombe 972h-]	1	1	19113555	M6(Oxidation); K34(Label:13C(6)15N(2))	HCD	1	0	1	1	5818		1	1.75066e+08	Heavy	Unique	Used	4.95133e+06	22617188	4.5679	0.982429	-0.0255756
RIQRGPVRGISFk	Unambiguous	40S ribosomal protein S17 [Schizosaccharomyces pombe 972h-]	2	2	19075512;19112037	K13(Label:13C(6)15N(2))	HCD	1	0	1	1	516			2.11967e+09	Heavy	Not Unique	Used	4.63354e+08	2116635988	4.56807	0.982442	-0.0255565
kDDGAAPGGFAPSFRGGFGRPVAA	Unambiguous	40S ribosomal protein S10 [Schizosaccharomyces pombe 972h-]	1	1	19112397	K1(Label:13C(6)15N(2))	HCD	1	0	1	1	6713			8.45357e+08	Heavy	Unique	Used	1.84958e+08	8.44959e+08	4.56838	0.982465	-0.0255216
FELGRQPSnTRIGPk	Unambiguous	40S ribosomal protein S8 [Schizosaccharomyces pombe 972h-]	2	1	19115431	N9(Deamidated); K15(Label:13C(6)15N(2))	HCD	1	0	1	1	3350			4.14536e+07	Heavy	Unique	Used	8944492	4.08667e+07	4.56893	0.982507	-0.0254602
SAIVQIDAAPFRVWYETHYGILMGSk	Unambiguous	40S ribosomal protein S8 [Schizosaccharomyces pombe 972h-]	2	1	19115431	K26(Label:13C(6)15N(2))	HCD	1	0	1	1	7271			8.00862e+08	Heavy	Unique	Used	1.75127e+08	800148368	4.56897	0.98251	-0.0254553
kDEGAAPSGFAPSFRGGFGRPQ	Unambiguous	40S ribosomal protein S10 [Schizosaccharomyces pombe 972h-]	1	1	19114930	K1(Label:13C(6)15N(2))	HCD	1	0	1	1	6633			5.5704e+08	Heavy	Unique	Used	1.21774e+08	5.5651e+08	4.57001	0.98259	-0.0253388
TTYAQSSQIRAIRQk	Unambiguous	40S ribosomal protein S1 [Schizosaccharomyces pombe 972h-]	1	1	19114028	K15(Label:13C(6)15N(2))	HCD	1	0	1	1	5362			1.03746e+08	Heavy	Unique	Used	2.26993e+07	1.03746e+08	4.57044	0.982623	-0.02529
LAGEYGLRNk	Unambiguous	40S ribosomal protein S9 [Schizosaccharomyces pombe 972h-]	2	2	19112632;19113857	K10(Label:13C(6)15N(2))	HCD	1	0	1	1	6027			3.63422e+07	Heavy	Not Unique	Used	7.92372e+06	3.62168e+07	4.57068	0.982641	-0.0252633
RPRSRTLTAVHNAILEDIVFPTEIIGk	Unambiguous	40S ribosomal protein S7 [Schizosaccharomyces pombe 972h-]	1	1	19114589	K27(Label:13C(6)15N(2))	HCD	1	0	1	1	7037			7.9688e+07	Heavy	Unique	Used	1.74312e+07	7.9688e+07	4.57157	0.982709	-0.0251636
TDASAVQAFGLRTHYGGGRTTGFALIYDDVEAMk	Unambiguous	40S ribosomal protein S24 [Schizosaccharomyces pombe 972h-]	1	1	19115165	K34(Label:13C(6)15N(2))	HCD	1	0	1	1	7117			1.39646e+09	Heavy	Unique	Used	303135156	1386230204	4.57298	0.982817	-0.0250054
LQEEERERK	Unambiguous	40S ribosomal protein S17 [Schizosaccharomyces pombe 972h-]	2	2	19075512;19112037		HCD	1	0	1	1	2670			4.5246e+08	Light	Not Unique	Used	4.5246e+08	2.06928e+09	4.5734	0.982849	-0.0249581
RALVHDGLARGIREASk	Unambiguous	40S ribosomal protein S12 [Schizosaccharomyces pombe 972h-]	2	1	19111998	K17(Label:13C(6)15N(2))	HCD	1	0	1	1	6035			1.10789e+07	Heavy	Unique	Used	2.39341e+06	1.09474e+07	4.57397	0.982893	-0.0248937
AIHQALFSQGVLVAK	Unambiguous	40S ribosomal protein S10 [Schizosaccharomyces pombe 972h-]	1	1	19114930		HCD	1	0	1	1	4358			2.43152e+07	Light	Unique	Used	2.43152e+07	111238226	4.57484	0.982959	-0.0247968
RIQRGPVRGISFk	Unambiguous	40S ribosomal protein S17 [Schizosaccharomyces pombe 972h-]	2	2	19075512;19112037	K13(Label:13C(6)15N(2))	HCD	1	0	1	1	6058			5.4434e+08	Heavy	Not Unique	Used	1.18788e+08	5.43546e+08	4.57576	0.98303	-0.0246928
TDASAVQAFGLRTHYGGGRTTGFALIYDDVEAmk	Unambiguous	40S ribosomal protein S24 [Schizosaccharomyces pombe 972h-]	1	1	19115165	M33(Oxidation); K34(Label:13C(6)15N(2))	HCD	1	0	1	1	6969			8.56476e+08	Heavy	Unique	Used	1.85885e+08	850724753	4.57662	0.983095	-0.0245972
LNLETNk	Unambiguous	40S ribosomal protein S4 [Schizosaccharomyces pombe 972h-]	3	2	19112469;19113142	K7(Label:13C(6)15N(2))	HCD	1	0	1	1	6050			5.19141e+06	Heavy	Not Unique	Used	1.13411e+06	5.19141e+06	4.5775	0.983162	-0.0244984
GMSPSQIGVTLRDSHGIPQVRFITGQk	Unambiguous	40S ribosomal protein S13 [Schizosaccharomyces pombe 972h-]	1	1	19114812	K27(Label:13C(6)15N(2))	HCD	1	0	1	1	5737			4.48735e+09	Heavy	Unique	Used	978681565	4480089437	4.57768	0.983176	-0.0244782
QLVQGPRSFFMDVk	Unambiguous	40S ribosomal protein S27 [Schizosaccharomyces pombe 972h-]	1	1	19112006	K14(Label:13C(6)15N(2))	HCD	1	0	1	1	5742		1	1.9019e+06	Heavy	Unique	Used	415164	1.9019e+06	4.58108	0.983436	-0.024097
QIVNVPSFVVRLDAQk	Unambiguous	40S ribosomal protein S9 [Schizosaccharomyces pombe 972h-]	1	1	19112632	K16(Label:13C(6)15N(2))	HCD	1	0	1	1	4645			6.02918e+08	Heavy	Unique	Used	1.31067e+08	600449624	4.58124	0.983448	-0.0240792
RLLGTAYk	Unambiguous	40S ribosomal protein S23 [Schizosaccharomyces pombe 972h-]	1	1	19112979	K8(Label:13C(6)15N(2))	HCD	1	0	1	1	6041			3.5526e+08	Heavy	Unique	Used	7.75301e+07	3.55213e+08	4.58162	0.983477	-0.024037
IPSWFLNRQk	Unambiguous	40S ribosomal protein S18 [Schizosaccharomyces pombe 972h-]	1	1	19113298	K10(Label:13C(6)15N(2))	HCD	1	0	1	1	6735			4.36684e+08	Heavy	Unique	Used	9.50796e+07	4.35638e+08	4.58182	0.983492	-0.0240142
YALnGREVk	Unambiguous	40S ribosomal protein S4 [Schizosaccharomyces pombe 972h-]	3	2	19112469;19113142	N4(Deamidated); K9(Label:13C(6)15N(2))	HCD	1	0	1	1	609			204613121	Heavy	Not Unique	Used	4.46472e+07	204613121	4.58289	0.983574	-0.0238952
KDDGAAPGGFAPSFRGGFGRPVAA	Unambiguous	40S ribosomal protein S10 [Schizosaccharomyces pombe 972h-]	1	1	19112397		HCD	1	0	1	1	4190			1.11864e+09	Light	Unique	Used	1.11864e+09	5126945972	4.5832	0.983598	-0.0238596
LSImPIRRGYWGTALGDPHTVPVk	Unambiguous	40S ribosomal protein S2 [Schizosaccharomyces pombe 972h-]	1	1	19075935	M4(Oxidation); K24(Label:13C(6)15N(2))	HCD	0.075	0	1	1	7815			1.50811e+08	Heavy	Unique	Used	3.27884e+07	1.50284e+08	4.58345	0.983617	-0.0238318
kDEGAAPSGFAPSFRGGFGRPQ	Unambiguous	40S ribosomal protein S10 [Schizosaccharomyces pombe 972h-]	1	1	19114930	K1(Label:13C(6)15N(2))	HCD	1	0	1	1	1767			7.09685e+08	Heavy	Unique	Used	1.54818e+08	7.09685e+08	4.58401	0.983659	-0.0237693
TDASAVQAFGLRTHYGGGRTTGFALIYDDVEAmk	Unambiguous	40S ribosomal protein S24 [Schizosaccharomyces pombe 972h-]	1	1	19115165	M33(Oxidation); K34(Label:13C(6)15N(2))	HCD	1	0	1	1	6970			7.88456e+08	Heavy	Unique	Used	170637657	782349638	4.58486	0.983724	-0.0236746
AIVVFVPqPLLk	Unambiguous	40S ribosomal protein S7 [Schizosaccharomyces pombe 972h-]	1	1	19114589	Q8(Deamidated); K12(Label:13C(6)15N(2))	HCD	1	0	1	1	4951		1	8.73695e+06	Heavy	Unique	Used	1.02275e+06	4.68935e+06	4.58504	0.983738	-0.0236543
TDASAVQAFGLRTHYGGGRTTGFALIYDDVEAMk	Unambiguous	40S ribosomal protein S24 [Schizosaccharomyces pombe 972h-]	1	1	19115165	K34(Label:13C(6)15N(2))	HCD	1	0	1	1	4849			6.8272e+08	Heavy	Unique	Used	147774283	677627948	4.58556	0.983777	-0.0235962
TTYAQSSQIRAIRQk	Unambiguous	40S ribosomal protein S1 [Schizosaccharomyces pombe 972h-]	1	1	19114028	K15(Label:13C(6)15N(2))	HCD	1	0	1	1	2873			9.02612e+07	Heavy	Unique	Used	19393687	8.89528e+07	4.58669	0.983863	-0.0234704
HPEVGVPNLQVIK	Unambiguous	40S ribosomal protein S10 [Schizosaccharomyces pombe 972h-]	2	2	19114930;19112397		HCD	1	0	1	1	1778			1.08835e+09	Light	Not Unique	Used	1.08835e+09	4.99332e+09	4.58798	0.983962	-0.023326
LQEEERERK	Unambiguous	40S ribosomal protein S17 [Schizosaccharomyces pombe 972h-]	2	2	19075512;19112037		HCD	1	0	1	1	13			108192293	Light	Not Unique	Used	108192293	496648359	4.59042	0.984148	-0.0230534
GmSPSQIGVTLRDSHGIPQVRFITGQk	Unambiguous	40S ribosomal protein S13 [Schizosaccharomyces pombe 972h-]	1	1	19114812	M2(Oxidation); K27(Label:13C(6)15N(2))	HCD	0.2778	0	1	1	5706			4.56985e+09	Heavy	Unique	Used	993812695	4563151978	4.59156	0.984234	-0.0229264
VAGVGLSALFHEk	Unambiguous	40S ribosomal protein S23 [Schizosaccharomyces pombe 972h-]	1	1	19112979	K13(Label:13C(6)15N(2))	HCD	1	0	1	1	2043			7.7232e+08	Heavy	Unique	Used	1.68074e+08	7.71776e+08	4.59189	0.984259	-0.0228896
HPEVGVPNLQVIk	Unambiguous	40S ribosomal protein S10 [Schizosaccharomyces pombe 972h-]	2	2	19114930;19112397	K13(Label:13C(6)15N(2))	HCD	1	0	1	1	1780			3.43855e+09	Heavy	Not Unique	Used	7.48678e+08	3437938469	4.59201	0.984269	-0.0228759
FEPHYRLVRVGQAEPIQk	Unambiguous	40S ribosomal protein S24 [Schizosaccharomyces pombe 972h-]	1	1	19112688	K18(Label:13C(6)15N(2))	HCD	1	0	1	1	5498			2.68194e+09	Heavy	Unique	Used	5.83842e+08	2.68194e+09	4.5936	0.984389	-0.0226993
LGSFSSVYHk	Unambiguous	40S ribosomal protein S7 [Schizosaccharomyces pombe 972h-]	1	1	19114589	K10(Label:13C(6)15N(2))	HCD	1	0	1	1	6264			2.22507e+07	Heavy	Unique	Used	4.84328e+06	2.22507e+07	4.59415	0.984431	-0.0226384
YALnGREVk	Unambiguous	40S ribosomal protein S4 [Schizosaccharomyces pombe 972h-]	3	2	19112469;19113142	N4(Deamidated); K9(Label:13C(6)15N(2))	HCD	1	0	1	1	2970			1.07255e+08	Heavy	Not Unique	Used	23101404	1.06137e+08	4.5944	0.98445	-0.0226101
KDDGAAPGGFAPSFRGGFGRPVAA	Unambiguous	40S ribosomal protein S10 [Schizosaccharomyces pombe 972h-]	1	1	19112397		HCD	1	0	1	1	4187			1.27435e+09	Light	Unique	Used	1.27435e+09	5855091909	4.59457	0.984463	-0.0225911
LGSFSSVYHk	Unambiguous	40S ribosomal protein S7 [Schizosaccharomyces pombe 972h-]	1	1	19114589	K10(Label:13C(6)15N(2))	HCD	1	0	1	1	3418			1.06437e+08	Heavy	Unique	Used	22812631	104854791	4.59635	0.984598	-0.0223931
SWISLPK	Unambiguous	40S ribosomal protein S4 [Schizosaccharomyces pombe 972h-]	3	2	19112469;19113142		HCD	1	0	1	1	2025			4.8945e+06	Light	Not Unique	Used	4.8945e+06	22498716	4.59673	0.984627	-0.0223503
FmTnRLLQRk	Unambiguous	40S ribosomal protein S24 [Schizosaccharomyces pombe 972h-]	2	2	19112688;19115165	M2(Oxidation); N4(Deamidated); K10(Label:13C(6)15N(2))	HCD	1	0	1	1	5371			95025218	Heavy	Not Unique	Used	20668923	95025218	4.59749	0.984685	-0.0222658
QPHIFQNAK	Unambiguous	40S ribosomal protein S11 [Schizosaccharomyces pombe 972h-]	1	1	19115584		HCD	1	0	1	1	650			4.93121e+07	Light	Unique	Used	4.93121e+07	226743766	4.59814	0.984734	-0.022194
SAIVQIDAAPFRVWYETHYGILmGSk	Unambiguous	40S ribosomal protein S8 [Schizosaccharomyces pombe 972h-]	2	1	19115431	M23(Oxidation); K26(Label:13C(6)15N(2))	HCD	1	0	1	1	4914			6.23447e+07	Heavy	Unique	Used	1.33789e+07	6.15262e+07	4.59876	0.984781	-0.0221248
TVRFNVLRVVK	Unambiguous	40S ribosomal protein S11 [Schizosaccharomyces pombe 972h-]	1	1	19115584		HCD	1	0	1	1	1612			1.14358e+08	Light	Unique	Used	1.14358e+08	526074703	4.60023	0.984893	-0.0219611
RASRVVIEK	Unambiguous	40S ribosomal protein S17 [Schizosaccharomyces pombe 972h-]	2	2	19075512;19112037		HCD	1	0	1	1	5903			7.76835e+07	Light	Not Unique	Used	7.76835e+07	3.57385e+08	4.60052	0.984915	-0.0219291
FITAYAAFLk	Unambiguous	40S ribosomal protein S19 [Schizosaccharomyces pombe 972h-]	1	1	19113385	K10(Label:13C(6)15N(2))	HCD	1	0	1	1	2167			1.16764e+06	Heavy	Unique	Used	247808	1.14028e+06	4.60147	0.984987	-0.0218231
FmTNRLLQRK	Unambiguous	40S ribosomal protein S24 [Schizosaccharomyces pombe 972h-]	2	2	19112688;19115165	M2(Oxidation)	HCD	1	0	1	1	2913			9.46215e+08	Light	Not Unique	Used	9.46215e+08	4354372674	4.60188	0.985018	-0.0217775
RLFEGNAIIRRLVRLGILDESRMk	Unambiguous	40S ribosomal protein S9 [Schizosaccharomyces pombe 972h-]	1	1	19112632	K24(Label:13C(6)15N(2))	HCD	1	0	1	1	7078			7.01744e+07	Heavy	Unique	Used	1.52423e+07	7.01744e+07	4.60394	0.985174	-0.0215494
RASRVVIEK	Unambiguous	40S ribosomal protein S17 [Schizosaccharomyces pombe 972h-]	2	2	19075512;19112037		HCD	1	0	1	1	2692			322449762	Light	Not Unique	Used	322449762	1.48499e+09	4.60534	0.98528	-0.021394
AIHQALFSqGVLVAk	Unambiguous	40S ribosomal protein S10 [Schizosaccharomyces pombe 972h-]	1	1	19114930	Q9(Deamidated); K15(Label:13C(6)15N(2))	HCD	0.3704	0	1	1	4260			3.91063e+07	Heavy	Unique	Used	7273743	33504511	4.60623	0.985348	-0.0212955
FRLILIESRIHRLARYYRk	Unambiguous	40S ribosomal protein S13 [Schizosaccharomyces pombe 972h-]	1	1	19114812	K19(Label:13C(6)15N(2))	HCD	1	0	1	1	5676			5914034740	Heavy	Unique	Used	1283912538	5914034740	4.60626	0.98535	-0.0212918
GMSPSQIGVTLRDSHGIPQVRFITGQk	Unambiguous	40S ribosomal protein S13 [Schizosaccharomyces pombe 972h-]	1	1	19114812	K27(Label:13C(6)15N(2))	HCD	1	0	1	1	5736			5215584596	Heavy	Unique	Used	1129480019	5208222552	4.61117	0.985722	-0.0207479
LLAGLAVRRAAYGVLRYVMEAGAk	Unambiguous	40S ribosomal protein S3 [Schizosaccharomyces pombe 972h-]	1	1	19113555	K24(Label:13C(6)15N(2))	HCD	1	0	1	1	8008			2.42672e+07	Heavy	Unique	Used	5.18332e+06	2.39068e+07	4.61225	0.985803	-0.0206287
EVGITALHIk	Unambiguous	40S ribosomal protein S14 [Schizosaccharomyces pombe 972h-]	1	1	19115099	K10(Label:13C(6)15N(2))	HCD	1	0	1	1	3846			6.85943e+07	Heavy	Unique	Used	13740374	63382966	4.6129	0.985853	-0.0205562
GRRIRELTALVQk	Unambiguous	40S ribosomal protein S3 [Schizosaccharomyces pombe 972h-]	1	1	19113555	K13(Label:13C(6)15N(2))	HCD	1	0	1	1	955			8.73407e+07	Heavy	Unique	Used	1.89332e+07	8.73407e+07	4.61311	0.985868	-0.0205331
SAIVQIDAAPFRVWYETHYGILmGSk	Unambiguous	40S ribosomal protein S8 [Schizosaccharomyces pombe 972h-]	2	1	19115431	M23(Oxidation); K26(Label:13C(6)15N(2))	HCD	1	0	1	1	4916			3.98905e+07	Heavy	Unique	Used	8.40121e+06	3.87681e+07	4.61459	0.98598	-0.0203696
FELGRQPSNTRIGPK	Unambiguous	40S ribosomal protein S8 [Schizosaccharomyces pombe 972h-]	2	1	19115431		HCD	1	0	1	1	3186			1.38844e+08	Light	Unique	Used	1.38844e+08	6.40796e+08	4.61522	0.986028	-0.0202991
TRIIQVAYHPSNNELVRTNTLTk	Unambiguous	40S ribosomal protein S8 [Schizosaccharomyces pombe 972h-]	2	1	19115431	K23(Label:13C(6)15N(2))	HCD	1	0	1	1	3757			8.39244e+07	Heavy	Unique	Used	1.77733e+07	82046971	4.61631	0.98611	-0.0201789
kDEGAAPSGFAPSFRGGFGRPQ	Unambiguous	40S ribosomal protein S10 [Schizosaccharomyces pombe 972h-]	1	1	19114930	K1(Label:13C(6)15N(2))	HCD	1	0	1	1	6641			9.31806e+08	Heavy	Unique	Used	2.01787e+08	9.31806e+08	4.61777	0.98622	-0.0200179
RLFEGNAIIRRLVRLGILDETRMk	Unambiguous	40S ribosomal protein S9 [Schizosaccharomyces pombe 972h-]	1	1	19113857	K24(Label:13C(6)15N(2))	HCD	1	0	1	1	7087			7.71671e+07	Heavy	Unique	Used	1.66687e+07	7.69856e+07	4.61856	0.98628	-0.0199308
VmFAMTQIk	Unambiguous	40S ribosomal protein S18 [Schizosaccharomyces pombe 972h-]	1	1	19113298	M2(Oxidation); K9(Label:13C(6)15N(2))	HCD	1	0	1	1	4060			1074714447	Heavy	Unique	Used	2.31735e+08	1070605838	4.61996	0.986386	-0.0197762
ELAPYDPDWYYVRAAAIARHIYLRk	Unambiguous	40S ribosomal protein S19 [Schizosaccharomyces pombe 972h-]	2	2	19113385;19112013	K25(Label:13C(6)15N(2))	HCD	1	0	1	1	7947			9.97928e+07	Heavy	Not Unique	Used	2.14349e+07	9.90446e+07	4.62071	0.986442	-0.0196934
IPSWFLNRQK	Unambiguous	40S ribosomal protein S18 [Schizosaccharomyces pombe 972h-]	1	1	19113298		HCD	1	0	1	1	4185			244492528	Light	Unique	Used	244492528	1130180742	4.62256	0.986582	-0.0194894
FAGVDIRVRVSGGGHVSQIYAIRQAISk	Unambiguous	40S ribosomal protein S16 [Schizosaccharomyces pombe 972h-]	1	1	19112530	K28(Label:13C(6)15N(2))	HCD	1	0	1	1	4301			2.89192e+08	Heavy	Unique	Used	6.25517e+07	2.89192e+08	4.62324	0.986633	-0.0194138
VVQSLEK	Unambiguous	40S ribosomal protein S19 [Schizosaccharomyces pombe 972h-]	2	2	19113385;19112013		HCD	1	0	1	1	430			7.23379e+07	Light	Not Unique	Used	7.23379e+07	334607985	4.62562	0.986813	-0.0191516
LRNHRREERWADAHYK	Unambiguous	40S ribosomal protein S23 [Schizosaccharomyces pombe 972h-]	1	1	19112979		HCD	1	0	1	1	2705			1.70272e+08	Light	Unique	Used	1.70272e+08	787761415	4.62648	0.986877	-0.0190577
YYPRLTLDFQTNK	Unambiguous	40S ribosomal protein S17 [Schizosaccharomyces pombe 972h-]	2	2	19075512;19112037		HCD	1	0	1	1	4404			1.24647e+09	Light	Not Unique	Used	1.24647e+09	5.76991e+09	4.62902	0.987069	-0.0187777
FRLILIESRIHRLARYYRk	Unambiguous	40S ribosomal protein S13 [Schizosaccharomyces pombe 972h-]	1	1	19114812	K19(Label:13C(6)15N(2))	HCD	1	0	1	1	7813			2.19089e+09	Heavy	Unique	Used	4.72859e+08	2.18894e+09	4.62916	0.987079	-0.018762
LREDLERLk	Unambiguous	40S ribosomal protein S18 [Schizosaccharomyces pombe 972h-]	1	1	19113298	K9(Label:13C(6)15N(2))	HCD	1	0	1	1	2953			1.18003e+09	Heavy	Unique	Used	254476027	1178613648	4.63153	0.987258	-0.0185014
QPHIFQNAK	Unambiguous	40S ribosomal protein S11 [Schizosaccharomyces pombe 972h-]	1	1	19115584		HCD	1	0	1	1	474			1.48118e+08	Light	Unique	Used	1.48118e+08	6.86301e+08	4.63348	0.987404	-0.0182877
ATNNIYPLQNVFVRk	Unambiguous	40S ribosomal protein S1 [Schizosaccharomyces pombe 972h-]	1	1	19113740	K15(Label:13C(6)15N(2))	HCD	1	0	1	1	4449			2.45564e+08	Heavy	Unique	Used	5.27916e+07	244720578	4.6356	0.987564	-0.0180545
LREDLERLk	Unambiguous	40S ribosomal protein S18 [Schizosaccharomyces pombe 972h-]	1	1	19113298	K9(Label:13C(6)15N(2))	HCD	1	0	1	1	6084			1.00048e+08	Heavy	Unique	Used	2.15693e+07	9.99926e+07	4.63588	0.987585	-0.0180236
RPRSRTLTAVHNAILEDIVFPTEIIGk	Unambiguous	40S ribosomal protein S7 [Schizosaccharomyces pombe 972h-]	1	1	19114589	K27(Label:13C(6)15N(2))	HCD	1	0	1	1	7032			1.27524e+08	Heavy	Unique	Used	2.49653e+07	115743048	4.63616	0.987605	-0.0179934
ANGLAPELPEDLYNLIk	Unambiguous	40S ribosomal protein S13 [Schizosaccharomyces pombe 972h-]	1	1	19114812	K17(Label:13C(6)15N(2))	HCD	1	0	1	1	7415			4.68011e+09	Heavy	Unique	Used	1008353132	4677755462	4.63901	0.987819	-0.017681
IMLPEPk	Unambiguous	40S ribosomal protein S3 [Schizosaccharomyces pombe 972h-]	1	1	19113555	K7(Label:13C(6)15N(2))	HCD	1	0	1	1	6390		1	3.90723e+06	Heavy	Unique	Used	543704	2.52233e+06	4.63916	0.987831	-0.0176637
VAGVGLSALFHEK	Unambiguous	40S ribosomal protein S23 [Schizosaccharomyces pombe 972h-]	1	1	19112979		HCD	1	0	1	1	6875			2.00228e+08	Light	Unique	Used	2.00228e+08	929581169	4.64262	0.98809	-0.0172851
FRLILIESRIHRLARYYRk	Unambiguous	40S ribosomal protein S13 [Schizosaccharomyces pombe 972h-]	1	1	19114812	K19(Label:13C(6)15N(2))	HCD	1	0	1	1	7812			2516716333	Heavy	Unique	Used	5.4193e+08	2516716333	4.64399	0.988193	-0.0171351
YYPRLTLDFQTNK	Unambiguous	40S ribosomal protein S17 [Schizosaccharomyces pombe 972h-]	2	2	19075512;19112037		HCD	1	0	1	1	4397			1.08395e+09	Light	Not Unique	Used	1.08395e+09	5034488793	4.64456	0.988236	-0.0170729
LRVEDIQGk	Unambiguous	40S ribosomal protein S1 [Schizosaccharomyces pombe 972h-]	2	2	19114028;19113740	K9(Label:13C(6)15N(2))	HCD	1	0	1	1	733			35960743	Heavy	Not Unique	Used	7.74198e+06	35960743	4.6449	0.988262	-0.0170351
SIEEIYLYSLPIk	Unambiguous	40S ribosomal protein S2 [Schizosaccharomyces pombe 972h-]	1	1	19075935	K13(Label:13C(6)15N(2))	HCD	1	0	1	1	7524			1.31409e+08	Heavy	Unique	Used	2.82832e+07	1.31409e+08	4.6462	0.988359	-0.0168931
IAGYTTHLmk	Unambiguous	40S ribosomal protein S17 [Schizosaccharomyces pombe 972h-]	2	2	19075512;19112037	M9(Oxidation); K10(Label:13C(6)15N(2))	HCD	1	0	1	1	2929			3771021121	Heavy	Not Unique	Used	8.10852e+08	3767909228	4.64685	0.988408	-0.016822
LREDLERLk	Unambiguous	40S ribosomal protein S18 [Schizosaccharomyces pombe 972h-]	1	1	19113298	K9(Label:13C(6)15N(2))	HCD	1	0	1	1	605			2926030815	Heavy	Unique	Used	6.29411e+08	2926030815	4.64884	0.988556	-0.0166048
QmVVDILHPGk	Unambiguous	40S ribosomal protein S24 [Schizosaccharomyces pombe 972h-]	2	2	19112688;19115165	M2(Oxidation); K11(Label:13C(6)15N(2))	HCD	1	0	1	1	3607			3869379626	Heavy	Not Unique	Used	8.31312e+08	3866505907	4.65109	0.988725	-0.0163593
HGRPGIGATHSSRFIPLK	Unambiguous	40S ribosomal protein S15 [Schizosaccharomyces pombe 972h-]	2	1	19075461		HCD	1	0	1	1	2933			1.63278e+08	Light	Unique	Used	1.63278e+08	759421898	4.65109	0.988725	-0.0163585
AIHQALFSQGVLVAk	Unambiguous	40S ribosomal protein S10 [Schizosaccharomyces pombe 972h-]	1	1	19114930	K15(Label:13C(6)15N(2))	HCD	1	0	1	1	4166			4736212576	Heavy	Unique	Used	1.0182e+09	4736212576	4.65157	0.988761	-0.0163067
LREDLERLk	Unambiguous	40S ribosomal protein S18 [Schizosaccharomyces pombe 972h-]	1	1	19113298	K9(Label:13C(6)15N(2))	HCD	1	0	1	1	6089			4.59408e+06	Heavy	Unique	Used	897434	4.17467e+06	4.65179	0.988777	-0.0162823
RLLGTAYK	Unambiguous	40S ribosomal protein S23 [Schizosaccharomyces pombe 972h-]	1	1	19112979		HCD	1	0	1	1	494			2690715640	Light	Unique	Used	2690715640	12520476681	4.65321	0.988884	-0.0161272
AIHQALFQQGVLVAk	Unambiguous	40S ribosomal protein S10 [Schizosaccharomyces pombe 972h-]	1	1	19112397	K15(Label:13C(6)15N(2))	HCD	1	0	1	1	1807			2.19992e+09	Heavy	Unique	Used	4.72456e+08	2.19889e+09	4.65418	0.988956	-0.016022
FRLILIESRIHRLARYYRk	Unambiguous	40S ribosomal protein S13 [Schizosaccharomyces pombe 972h-]	1	1	19114812	K19(Label:13C(6)15N(2))	HCD	1	0	1	1	5683			2.54792e+09	Heavy	Unique	Used	5.46905e+08	2547195700	4.65747	0.989202	-0.0156631
RVAAPHHWLLDk	Unambiguous	40S ribosomal protein S4 [Schizosaccharomyces pombe 972h-]	3	2	19112469;19113142	K12(Label:13C(6)15N(2))	HCD	1	0	1	1	6197			9.48063e+06	Heavy	Not Unique	Used	2.0271e+06	9.44126e+06	4.65753	0.989206	-0.015657
HPEVGVPNLQVIk	Unambiguous	40S ribosomal protein S10 [Schizosaccharomyces pombe 972h-]	2	2	19114930;19112397	K13(Label:13C(6)15N(2))	HCD	1	0	1	1	4065			5.3961e+09	Heavy	Not Unique	Used	1156614305	5387194276	4.65773	0.989221	-0.0156353
VMFAmTQIk	Unambiguous	40S ribosomal protein S18 [Schizosaccharomyces pombe 972h-]	1	1	19113298	M5(Oxidation); K9(Label:13C(6)15N(2))	HCD	1	0	1	1	3653			1.83235e+09	Heavy	Unique	Used	393175606	1831565589	4.65839	0.98927	-0.0155631
SWISLPk	Unambiguous	40S ribosomal protein S4 [Schizosaccharomyces pombe 972h-]	3	2	19112469;19113142	K7(Label:13C(6)15N(2))	HCD	1	0	1	1	4583			102514122	Heavy	Not Unique	Used	20972486	97699540	4.65846	0.989276	-0.0155552
ADADSVVEQILK	Unambiguous	40S ribosomal protein S13 [Schizosaccharomyces pombe 972h-]	1	1	19114812		HCD	1	0	1	1	4732			3949890001	Light	Unique	Used	3949890001	18402100140	4.65889	0.989308	-0.0155088
RLFEGNAIIRRLVRLGILDETRmk	Unambiguous	40S ribosomal protein S9 [Schizosaccharomyces pombe 972h-]	1	1	19113857	M23(Oxidation); K24(Label:13C(6)15N(2))	HCD	1	0	1	1	7906			4.09997e+08	Heavy	Unique	Used	8.80022e+07	4.09997e+08	4.65895	0.989312	-0.0155027
VGALPPTWk	Unambiguous	40S ribosomal protein S13 [Schizosaccharomyces pombe 972h-]	1	1	19114812	K9(Label:13C(6)15N(2))	HCD	1	0	1	1	1965			45235099	Heavy	Unique	Used	9706855	45235099	4.66012	0.989399	-0.015375
LLAGLAVRRAAYGVLRYVmEAGAk	Unambiguous	40S ribosomal protein S3 [Schizosaccharomyces pombe 972h-]	1	1	19113555	M19(Oxidation); K24(Label:13C(6)15N(2))	HCD	1	0	1	1	7962			1.89734e+08	Heavy	Unique	Used	4.0466e+07	1.88603e+08	4.66077	0.989448	-0.0153046
EYQIVDYFLPRLNDEVmK	Unambiguous	40S ribosomal protein S2 [Schizosaccharomyces pombe 972h-]	1	1	19075935	M17(Oxidation)	HCD	1	0	1	1	7280			5.78837e+07	Light	Unique	Used	5.78837e+07	2.69877e+08	4.6624	0.989569	-0.0151271
HGRPGIGATHSSRFIPLk	Unambiguous	40S ribosomal protein S15 [Schizosaccharomyces pombe 972h-]	2	1	19075461	K18(Label:13C(6)15N(2))	HCD	1	0	1	1	628			1.90068e+07	Heavy	Unique	Used	3763056	1.75498e+07	4.6637	0.989667	-0.0149855
FPFEGVEVk	Unambiguous	40S ribosomal protein S5 [Schizosaccharomyces pombe 972h-]	2	1	19115124	K9(Label:13C(6)15N(2))	HCD	1	0	1	1	6835			8.43697e+07	Heavy	Unique	Used	1.80823e+07	8.43697e+07	4.66586	0.989828	-0.0147507
IQTHRGLRHALDLRVRGQHTk	Unambiguous	40S ribosomal protein S18 [Schizosaccharomyces pombe 972h-]	1	1	19113298	K21(Label:13C(6)15N(2))	HCD	1	0	1	1	2758			147805077	Heavy	Unique	Used	3.14431e+07	146711153	4.66592	0.989832	-0.0147445
RLFEGNAIIRRLVRLGILDETRmk	Unambiguous	40S ribosomal protein S9 [Schizosaccharomyces pombe 972h-]	1	1	19113857	M23(Oxidation); K24(Label:13C(6)15N(2))	HCD	1	0	1	1	5781			2.56526e+08	Heavy	Unique	Used	5.49594e+07	2.56526e+08	4.66755	0.989953	-0.0145676
QMVVDILHPGk	Unambiguous	40S ribosomal protein S24 [Schizosaccharomyces pombe 972h-]	2	2	19112688;19115165	K11(Label:13C(6)15N(2))	HCD	1	0	1	1	4070			4.23141e+09	Heavy	Not Unique	Used	905669042	4227563638	4.66789	0.989979	-0.0145305
IAGYTTHLmK	Unambiguous	40S ribosomal protein S17 [Schizosaccharomyces pombe 972h-]	2	2	19075512;19112037	M9(Oxidation)	HCD	1	0	1	1	6063			4.20962e+07	Light	Not Unique	Used	4.20962e+07	1.96533e+08	4.66867	0.990037	-0.0144457
EVSLDETGHIk	Unambiguous	40S ribosomal protein S5 [Schizosaccharomyces pombe 972h-]	1	1	19115124	K11(Label:13C(6)15N(2))	HCD	1	0	1	1	3192			5.39863e+06	Heavy	Unique	Used	1.09259e+06	5.10118e+06	4.66887	0.990052	-0.0144239
SIEEIYLYSLPIk	Unambiguous	40S ribosomal protein S2 [Schizosaccharomyces pombe 972h-]	1	1	19075935	K13(Label:13C(6)15N(2))	HCD	1	0	1	1	2190			1.41729e+06	Heavy	Unique	Used	303374	1.41729e+06	4.67174	0.990265	-0.0141132
AIHQALFQQGVLVAK	Unambiguous	40S ribosomal protein S10 [Schizosaccharomyces pombe 972h-]	1	1	19112397		HCD	1	0	1	1	4108			179440732	Light	Unique	Used	179440732	8.38565e+08	4.67321	0.990375	-0.0139536
mTTPQWIDIVk	Unambiguous	40S ribosomal protein S19 [Schizosaccharomyces pombe 972h-]	2	2	19113385;19112013	M1(Oxidation); K11(Label:13C(6)15N(2))	HCD	1	0	1	1	6968			5.99973e+07	Heavy	Not Unique	Used	1.26761e+07	5.9253e+07	4.67439	0.990463	-0.0138257
RASRVVIEk	Unambiguous	40S ribosomal protein S17 [Schizosaccharomyces pombe 972h-]	2	2	19075512;19112037	K9(Label:13C(6)15N(2))	HCD	1	0	1	1	170			2.86359e+09	Heavy	Not Unique	Used	611484807	2858851780	4.67526	0.990527	-0.0137316
KDEGAAPSGFAPSFRGGFGRPQ	Unambiguous	40S ribosomal protein S10 [Schizosaccharomyces pombe 972h-]	1	1	19114930		HCD	1	0	1	1	4030			387050769	Light	Unique	Used	387050769	1809854708	4.67601	0.990583	-0.0136503
QmVVDILHPGK	Unambiguous	40S ribosomal protein S24 [Schizosaccharomyces pombe 972h-]	2	2	19112688;19115165	M2(Oxidation)	HCD	1	0	1	1	1396			1886672811	Light	Not Unique	Used	1886672811	8822726156	4.67634	0.990607	-0.0136148
AIHQALFSQGVLVAK	Unambiguous	40S ribosomal protein S10 [Schizosaccharomyces pombe 972h-]	1	1	19114930		HCD	1	0	1	1	4362			1.24505e+07	Light	Unique	Used	1.24505e+07	58240121	4.67772	0.99071	-0.0134654
ADADSVVEQILk	Unambiguous	40S ribosomal protein S13 [Schizosaccharomyces pombe 972h-]	1	1	19114812	K12(Label:13C(6)15N(2))	HCD	1	0	1	1	7046			9.86236e+08	Heavy	Unique	Used	2.10535e+08	9.84992e+08	4.67851	0.990768	-0.0133803
AILMQRLIk	Unambiguous	40S ribosomal protein S4 [Schizosaccharomyces pombe 972h-]	2	1	19113142	K9(Label:13C(6)15N(2))	HCD	1	0	1	1	4005			6.71465e+07	Heavy	Unique	Used	1.32327e+07	61932720	4.68027	0.990899	-0.0131896
QMVVDILHPGk	Unambiguous	40S ribosomal protein S24 [Schizosaccharomyces pombe 972h-]	2	2	19112688;19115165	K11(Label:13C(6)15N(2))	HCD	1	0	1	1	1811			1.90431e+09	Heavy	Not Unique	Used	4.06874e+08	1.90431e+09	4.68033	0.990904	-0.0131834
DQYVPEVSELEk	Unambiguous	40S ribosomal protein S17 [Schizosaccharomyces pombe 972h-]	1	1	19075512	K12(Label:13C(6)15N(2))	HCD	1	0	1	1	1877			1.23406e+09	Heavy	Unique	Used	2.63244e+08	1232528106	4.68208	0.991033	-0.0129949
FRALRLDSGNFSWGSEGVSk	Unambiguous	40S ribosomal protein S8 [Schizosaccharomyces pombe 972h-]	2	1	19115431	K20(Label:13C(6)15N(2))	HCD	1	0	1	1	4393		1	282100288	Heavy	Unique	Used	60246064	282100288	4.68247	0.991062	-0.0129527
DQYVPEVSELEVDRVNVDQDTk	Unambiguous	40S ribosomal protein S17 [Schizosaccharomyces pombe 972h-]	1	1	19112037	K22(Label:13C(6)15N(2))	HCD	1	0	1	1	4444			1.75386e+09	Heavy	Unique	Used	372963043	1746399000	4.6825	0.991064	-0.0129494
GVPFLVTHDGRTIRYPDPLIk	Unambiguous	40S ribosomal protein S4 [Schizosaccharomyces pombe 972h-]	3	2	19112469;19113142	K21(Label:13C(6)15N(2))	HCD	1	0	1	1	7845			4.5226e+07	Heavy	Not Unique	Used	8.47781e+06	39700708	4.6829	0.991094	-0.0129062
RLFEGNAIIRRLVRLGILDESRMk	Unambiguous	40S ribosomal protein S9 [Schizosaccharomyces pombe 972h-]	1	1	19112632	K24(Label:13C(6)15N(2))	HCD	1	0	1	1	7919			5.38081e+07	Heavy	Unique	Used	1.12896e+07	5.28773e+07	4.6837	0.991154	-0.0128194
ADADSVVEQILK	Unambiguous	40S ribosomal protein S13 [Schizosaccharomyces pombe 972h-]	1	1	19114812		HCD	1	0	1	1	2220			3.41675e+06	Light	Unique	Used	3.41675e+06	1.60057e+07	4.68448	0.991212	-0.0127351
LRnHRREERWADAHYk	Unambiguous	40S ribosomal protein S23 [Schizosaccharomyces pombe 972h-]	1	1	19112979	N3(Deamidated); K16(Label:13C(6)15N(2))	HCD	1	0	1	1	5336			5.35409e+08	Heavy	Unique	Used	1.1372e+08	532730497	4.68459	0.991219	-0.0127238
IAGYTTHLMk	Unambiguous	40S ribosomal protein S17 [Schizosaccharomyces pombe 972h-]	2	2	19075512;19112037	K10(Label:13C(6)15N(2))	HCD	1	0	1	1	6231			5.54184e+07	Heavy	Not Unique	Used	1.18294e+07	5.54184e+07	4.68482	0.991236	-0.012699
FADGFmIHSGQPAVDFIDSATRHVLLRQGVLGVk	Unambiguous	40S ribosomal protein S3 [Schizosaccharomyces pombe 972h-]	1	1	19113555	M6(Oxidation); K34(Label:13C(6)15N(2))	HCD	0.6609	0	1	1	4930			9.53187e+07	Heavy	Unique	Used	1.98748e+07	93164276	4.68756	0.99144	-0.012403
IPSWFLnRQk	Unambiguous	40S ribosomal protein S18 [Schizosaccharomyces pombe 972h-]	1	1	19113298	N7(Deamidated); K10(Label:13C(6)15N(2))	HCD	0.2759	0	1	1	4265			5.266e+07	Heavy	Unique	Used	1.09379e+07	51303099	4.69041	0.991651	-0.012096
SFQLLANNVDSk	Unambiguous	40S ribosomal protein S18 [Schizosaccharomyces pombe 972h-]	1	1	19113298	K12(Label:13C(6)15N(2))	HCD	1	0	1	1	1950			112749938	Heavy	Unique	Used	2.39628e+07	1.12411e+08	4.69104	0.991697	-0.0120284
ALITYDRTLLVADPRRmEPk	Unambiguous	40S ribosomal protein S16 [Schizosaccharomyces pombe 972h-]	1	1	19112530	M17(Oxidation); K20(Label:13C(6)15N(2))	HCD	1	0	1	1	4066			4.10635e+08	Heavy	Unique	Used	8.6774e+07	407350862	4.69439	0.991945	-0.0116687
GmSPSQIGVTLRDSHGIPQVRFITGQk	Unambiguous	40S ribosomal protein S13 [Schizosaccharomyces pombe 972h-]	1	1	19114812	M2(Oxidation); K27(Label:13C(6)15N(2))	HCD	0.2667	0	1	1	7839			1.08082e+09	Heavy	Unique	Used	228003546	1070409126	4.6947	0.991968	-0.0116346
EVSLDETGHIk	Unambiguous	40S ribosomal protein S5 [Schizosaccharomyces pombe 972h-]	1	1	19115124	K11(Label:13C(6)15N(2))	HCD	1	0	1	1	897			607756544	Heavy	Unique	Used	129442012	607756544	4.6952	0.992005	-0.0115809
EVSLDETGHIk	Unambiguous	40S ribosomal protein S5 [Schizosaccharomyces pombe 972h-]	1	1	19115124	K11(Label:13C(6)15N(2))	HCD	1	0	1	1	896			890227600	Heavy	Unique	Used	188917960	887042504	4.69538	0.992018	-0.0115614
RIVDEVAIIASK	Unambiguous	40S ribosomal protein S17 [Schizosaccharomyces pombe 972h-]	2	2	19075512;19112037		HCD	1	0	1	1	4161			669238696	Light	Not Unique	Used	669238696	3142389488	4.69547	0.992024	-0.0115524
AIHQALFSQGVLVAk	Unambiguous	40S ribosomal protein S10 [Schizosaccharomyces pombe 972h-]	1	1	19114930	K15(Label:13C(6)15N(2))	HCD	1	0	1	1	1838			4.90562e+08	Heavy	Unique	Used	1.04255e+08	4.89732e+08	4.69746	0.992172	-0.0113382
ANGLAPELPEDLYNLIk	Unambiguous	40S ribosomal protein S13 [Schizosaccharomyces pombe 972h-]	1	1	19114812	K17(Label:13C(6)15N(2))	HCD	1	0	1	1	5155			3.75214e+09	Heavy	Unique	Used	7.98627e+08	3.75167e+09	4.69765	0.992186	-0.0113178
RMGQEVPGDSVGPEFAGYVFk	Unambiguous	40S ribosomal protein S6 [Schizosaccharomyces pombe 972h-]	2	1	19113745	K21(Label:13C(6)15N(2))	HCD	1	0	1	1	4604			2.2094e+08	Heavy	Unique	Used	4.69995e+07	2.2094e+08	4.7009	0.992425	-0.0109697
DQYVPEVSELEk	Unambiguous	40S ribosomal protein S17 [Schizosaccharomyces pombe 972h-]	1	1	19075512	K12(Label:13C(6)15N(2))	HCD	1	0	1	1	4249			4.63714e+09	Heavy	Unique	Used	984766666	4630527860	4.70216	0.992518	-0.0108345
HEIWRVALTLSk	Unambiguous	40S ribosomal protein S9 [Schizosaccharomyces pombe 972h-]	2	2	19112632;19113857	K12(Label:13C(6)15N(2))	HCD	1	0	1	1	4223			1.4383e+07	Heavy	Not Unique	Used	2.91204e+06	13705186	4.70638	0.992829	-0.0103821
HGRPGIGATHSSRFIPLk	Unambiguous	40S ribosomal protein S15 [Schizosaccharomyces pombe 972h-]	2	1	19075461	K18(Label:13C(6)15N(2))	HCD	1	0	1	1	2935			1.85353e+08	Heavy	Unique	Used	36418663	171421594	4.70697	0.992873	-0.0103188
RIQRGPVRGISFK	Unambiguous	40S ribosomal protein S17 [Schizosaccharomyces pombe 972h-]	2	2	19075512;19112037		HCD	1	0	1	1	2903			1255321753	Light	Not Unique	Used	1255321753	5908875804	4.70706	0.99288	-0.0103092
TDASAVQAFGLRTHYGGGRTTGFALIYDDVEAmk	Unambiguous	40S ribosomal protein S24 [Schizosaccharomyces pombe 972h-]	1	1	19115165	M33(Oxidation); K34(Label:13C(6)15N(2))	HCD	1	0	1	1	7411			3.11829e+07	Heavy	Unique	Used	6230312	2.93311e+07	4.7078	0.992934	-0.0102296
RASRVVIEK	Unambiguous	40S ribosomal protein S17 [Schizosaccharomyces pombe 972h-]	2	2	19075512;19112037		HCD	1	0	1	1	167			6.12549e+08	Light	Not Unique	Used	6.12549e+08	2.88413e+09	4.70841	0.992979	-0.0101652
EVATAIRGAIIMGk	Unambiguous	40S ribosomal protein S2 [Schizosaccharomyces pombe 972h-]	1	1	19075935	K14(Label:13C(6)15N(2))	HCD	1	0	1	1	6649			1639883	Heavy	Unique	Used	348178	1639883	4.7099	0.993089	-0.0100054
SIHHARVLIFQRHIRVGk	Unambiguous	40S ribosomal protein S9 [Schizosaccharomyces pombe 972h-]	2	2	19112632;19113857	K18(Label:13C(6)15N(2))	HCD	1	0	1	1	7609			7.51237e+06	Heavy	Not Unique	Used	1.43053e+06	6.74079e+06	4.71208	0.993249	-0.009772
QPHIFQNAk	Unambiguous	40S ribosomal protein S11 [Schizosaccharomyces pombe 972h-]	1	1	19115584	K9(Label:13C(6)15N(2))	HCD	1	0	1	1	2896			1.97823e+08	Heavy	Unique	Used	4.04401e+07	190647688	4.71432	0.993414	-0.00953323
RPRSRTLTAVHNAILEDIVFPTEIIGk	Unambiguous	40S ribosomal protein S7 [Schizosaccharomyces pombe 972h-]	1	1	19114589	K27(Label:13C(6)15N(2))	HCD	1	0	1	1	4724			4.51698e+08	Heavy	Unique	Used	9.58027e+07	4.51698e+08	4.71488	0.993455	-0.00947338
VYEPILVAGADk	Unambiguous	40S ribosomal protein S16 [Schizosaccharomyces pombe 972h-]	1	1	19112530	K12(Label:13C(6)15N(2))	HCD	1	0	1	1	6696			1.38488e+08	Heavy	Unique	Used	2.93719e+07	1.38488e+08	4.71499	0.993463	-0.00946185
AIHQALFQQGVLVAk	Unambiguous	40S ribosomal protein S10 [Schizosaccharomyces pombe 972h-]	1	1	19112397	K15(Label:13C(6)15N(2))	HCD	1	0	1	1	6687			5.63498e+08	Heavy	Unique	Used	1.19503e+08	5.63498e+08	4.71536	0.99349	-0.00942207
TDRDESSPYAAmLAAQDAAAk	Unambiguous	40S ribosomal protein S14 [Schizosaccharomyces pombe 972h-]	1	1	19115099	M12(Oxidation); K21(Label:13C(6)15N(2))	HCD	0.5444	0	1	1	6424			6.52345e+06	Heavy	Unique	Used	1.06614e+06	5028229	4.7163	0.993559	-0.0093225
LNLETNk	Unambiguous	40S ribosomal protein S4 [Schizosaccharomyces pombe 972h-]	3	2	19112469;19113142	K7(Label:13C(6)15N(2))	HCD	1	0	1	1	528			5.11531e+08	Heavy	Not Unique	Used	1.0808e+08	509939582	4.71816	0.993696	-0.00912403
HPEVGVPNLQVIk	Unambiguous	40S ribosomal protein S10 [Schizosaccharomyces pombe 972h-]	2	2	19114930;19112397	K13(Label:13C(6)15N(2))	HCD	1	0	1	1	6672			4.43021e+08	Heavy	Not Unique	Used	9.38085e+07	4.42679e+08	4.71897	0.993755	-0.00903774
IAGYTTHLmk	Unambiguous	40S ribosomal protein S17 [Schizosaccharomyces pombe 972h-]	2	2	19075512;19112037	M9(Oxidation); K10(Label:13C(6)15N(2))	HCD	1	0	1	1	2931			2326242524	Heavy	Not Unique	Used	480510596	2268354768	4.72072	0.993884	-0.00885107
QMVVDILHPGk	Unambiguous	40S ribosomal protein S24 [Schizosaccharomyces pombe 972h-]	2	2	19112688;19115165	K11(Label:13C(6)15N(2))	HCD	1	0	1	1	1806			3535366882	Heavy	Not Unique	Used	7.4887e+08	3535366882	4.72093	0.9939	-0.00882794
AQVGRPNILNATDEDIk	Unambiguous	40S ribosomal protein S0A [Schizosaccharomyces pombe 972h-]	1	1	19112932	K17(Label:13C(6)15N(2))	HCD	1	0	1	1	3875			6.84699e+07	Heavy	Unique	Used	1.36934e+07	64651090	4.72134	0.993929	-0.00878515
RMGQEVPGDSVGPEFAGYVFk	Unambiguous	40S ribosomal protein S6 [Schizosaccharomyces pombe 972h-]	2	1	19113745	K21(Label:13C(6)15N(2))	HCD	1	0	1	1	6950			131197916	Heavy	Unique	Used	2.66214e+07	125728954	4.72285	0.99404	-0.00862389
VAGVGLSALFHEk	Unambiguous	40S ribosomal protein S23 [Schizosaccharomyces pombe 972h-]	1	1	19112979	K13(Label:13C(6)15N(2))	HCD	1	0	1	1	4422			9.94898e+09	Heavy	Unique	Used	2.10571e+09	9.94898e+09	4.72476	0.99418	-0.00842129
TRIIQVAYHPSnNELVRTNTLTk	Unambiguous	40S ribosomal protein S8 [Schizosaccharomyces pombe 972h-]	2	1	19115431	N12(Deamidated); K23(Label:13C(6)15N(2))	HCD	0.1343	0	1	1	1641			4.91106e+07	Heavy	Unique	Used	1.0177e+07	48095610	4.72593	0.994266	-0.00829684
FADGFMIHSGQPAVDFIDSATRHVLLRQGVLGVk	Unambiguous	40S ribosomal protein S3 [Schizosaccharomyces pombe 972h-]	1	1	19113555	K34(Label:13C(6)15N(2))	HCD	1	0	1	1	7278			1.30208e+08	Heavy	Unique	Used	2.71219e+07	128195498	4.72664	0.994318	-0.00822084
RIVDEVAIIASK	Unambiguous	40S ribosomal protein S17 [Schizosaccharomyces pombe 972h-]	2	2	19075512;19112037		HCD	1	0	1	1	6699			112620597	Light	Not Unique	Used	112620597	5.32415e+08	4.72751	0.994381	-0.00812879
THLRNMIILPEmVGSVVGIYnGk	Unambiguous	40S ribosomal protein S15 [Schizosaccharomyces pombe 972h-]	2	1	19075461	M12(Oxidation); N21(Deamidated); K23(Label:13C(6)15N(2))	HCD	0.3148	0	1	1	4682			24873180	Heavy	Unique	Used	5.26136e+06	24873180	4.72751	0.994382	-0.0081279
IAGYTTHLmk	Unambiguous	40S ribosomal protein S17 [Schizosaccharomyces pombe 972h-]	2	2	19075512;19112037	M9(Oxidation); K10(Label:13C(6)15N(2))	HCD	1	0	1	1	570			4.36208e+09	Heavy	Not Unique	Used	922096145	4359999029	4.72836	0.994444	-0.00803851
ATSTPNPk	Unambiguous	40S ribosomal protein S8 [Schizosaccharomyces pombe 972h-]	1	1	19115431	K8(Label:13C(6)15N(2))	HCD	1	0	1	1	66			104058855	Heavy	Unique	Used	2.19948e+07	104058855	4.73107	0.994642	-0.00775049
LRNHRREERWADAHYk	Unambiguous	40S ribosomal protein S23 [Schizosaccharomyces pombe 972h-]	1	1	19112979	K16(Label:13C(6)15N(2))	HCD	1	0	1	1	5313			8303966559	Heavy	Unique	Used	1752254566	8290076240	4.73109	0.994644	-0.00774809
RmGQEVPGDSVGPEFAGYVFk	Unambiguous	40S ribosomal protein S6 [Schizosaccharomyces pombe 972h-]	2	1	19113745	M2(Oxidation); K21(Label:13C(6)15N(2))	HCD	0.3077	0	1	1	4525			4.17288e+08	Heavy	Unique	Used	8.81957e+07	4.17288e+08	4.73138	0.994665	-0.00771718
GmSPSQIGVTLRDSHGIPQVRFITGQk	Unambiguous	40S ribosomal protein S13 [Schizosaccharomyces pombe 972h-]	1	1	19114812	M2(Oxidation); K27(Label:13C(6)15N(2))	HCD	0.3047	0	1	1	5712			3.96413e+09	Heavy	Unique	Used	836110566	3956834854	4.73243	0.994742	-0.00760603
GmSPSQIGVTLRDSHGIPQVRFITGQk	Unambiguous	40S ribosomal protein S13 [Schizosaccharomyces pombe 972h-]	1	1	19114812	M2(Oxidation); K27(Label:13C(6)15N(2))	HCD	0.2784	0	1	1	2595			2.00801e+08	Heavy	Unique	Used	42330075	200417664	4.73464	0.994903	-0.0073717
TPAEAIYGEYVDk	Unambiguous	40S ribosomal protein S11 [Schizosaccharomyces pombe 972h-]	1	1	19115584	K13(Label:13C(6)15N(2))	HCD	1	0	1	1	6749			1.9599e+08	Heavy	Unique	Used	4.11059e+07	1.94637e+08	4.73501	0.994931	-0.00733222
RVAAPHHWLLDk	Unambiguous	40S ribosomal protein S4 [Schizosaccharomyces pombe 972h-]	3	2	19112469;19113142	K12(Label:13C(6)15N(2))	HCD	1	0	1	1	3107			1.65755e+08	Heavy	Not Unique	Used	34046122	161210760	4.73507	0.994935	-0.00732615
GDIPGVRFk	Unambiguous	40S ribosomal protein S23 [Schizosaccharomyces pombe 972h-]	1	1	19112979	K9(Label:13C(6)15N(2))	HCD	1	0	1	1	1237			7.8073e+09	Heavy	Unique	Used	1.64753e+09	7804446220	4.73707	0.995081	-0.00711457
FMTNRLLQRK	Unambiguous	40S ribosomal protein S24 [Schizosaccharomyces pombe 972h-]	2	2	19112688;19115165		HCD	1	0	1	1	7637			30527440	Light	Not Unique	Used	30527440	1.447e+08	4.74	0.995295	-0.00680444
EYQIVDYFLPRLNDEVMk	Unambiguous	40S ribosomal protein S2 [Schizosaccharomyces pombe 972h-]	1	1	19075935	K18(Label:13C(6)15N(2))	HCD	1	0	1	1	5095			2.90992e+07	Heavy	Unique	Used	5.86069e+06	2.77869e+07	4.74123	0.995385	-0.00667393
SFQLLANNVDSk	Unambiguous	40S ribosomal protein S18 [Schizosaccharomyces pombe 972h-]	1	1	19113298	K12(Label:13C(6)15N(2))	HCD	1	0	1	1	4222			3.53231e+09	Heavy	Unique	Used	7.443e+08	3529195980	4.74163	0.995414	-0.00663126
EYQIVDYFLPRLNDEVMk	Unambiguous	40S ribosomal protein S2 [Schizosaccharomyces pombe 972h-]	1	1	19075935	K18(Label:13C(6)15N(2))	HCD	1	0	1	1	7358			8.83179e+07	Heavy	Unique	Used	1.84433e+07	8.74616e+07	4.74218	0.995454	-0.00657364
FEPHYRLVRVGHAEPIQk	Unambiguous	40S ribosomal protein S24 [Schizosaccharomyces pombe 972h-]	1	1	19115165	K18(Label:13C(6)15N(2))	HCD	1	0	1	1	5427			8.35826e+08	Heavy	Unique	Used	1.74881e+08	829406224	4.74268	0.99549	-0.00652078
VRTDSTFPTGFmDVISVEk	Unambiguous	40S ribosomal protein S4 [Schizosaccharomyces pombe 972h-]	2	2	19112469;19113142	M12(Oxidation); K19(Label:13C(6)15N(2))	HCD	1	0	1	1	4511			9.409e+07	Heavy	Not Unique	Used	1.81723e+07	86187260	4.74277	0.995497	-0.00651089
EDDVRQFVIRREVVPk	Unambiguous	40S ribosomal protein S6 [Schizosaccharomyces pombe 972h-]	2	1	19113745	K16(Label:13C(6)15N(2))	HCD	1	0	1	1	3766			131020317	Heavy	Unique	Used	2.71127e+07	1.28598e+08	4.74308	0.99552	-0.00647812
AIHQALFQQGVLVAk	Unambiguous	40S ribosomal protein S10 [Schizosaccharomyces pombe 972h-]	1	1	19112397	K15(Label:13C(6)15N(2))	HCD	1	0	1	1	4114			4.66827e+08	Heavy	Unique	Used	9.81497e+07	4.65789e+08	4.7457	0.99571	-0.00620177
SIEEIYLYSLPIK	Unambiguous	40S ribosomal protein S2 [Schizosaccharomyces pombe 972h-]	1	1	19075935		HCD	1	0	1	1	5260			12698080	Light	Unique	Used	12698080	6.02686e+07	4.74628	0.995753	-0.0061404
INVDQDTk	Unambiguous	40S ribosomal protein S17 [Schizosaccharomyces pombe 972h-]	1	1	19075512	K8(Label:13C(6)15N(2))	HCD	1	0	1	1	429			1.88415e+09	Heavy	Unique	Used	3.96953e+08	1.88415e+09	4.74652	0.995771	-0.00611476
VmFAmTQIk	Unambiguous	40S ribosomal protein S18 [Schizosaccharomyces pombe 972h-]	1	1	19113298	M2(Oxidation); M5(Oxidation); K9(Label:13C(6)15N(2))	HCD	1	0	1	1	1101			2.00937e+09	Heavy	Unique	Used	4.23077e+08	2008219117	4.7467	0.995784	-0.00609598
VAGVGLSALFHEK	Unambiguous	40S ribosomal protein S23 [Schizosaccharomyces pombe 972h-]	1	1	19112979		HCD	1	0	1	1	2044			7.72864e+07	Light	Unique	Used	7.72864e+07	3.66868e+08	4.74687	0.995796	-0.00607854
RMGQEVPGDSVGPEFAGYVFk	Unambiguous	40S ribosomal protein S6 [Schizosaccharomyces pombe 972h-]	2	1	19113745	K21(Label:13C(6)15N(2))	HCD	1	0	1	1	4607			9.12142e+07	Heavy	Unique	Used	1.86432e+07	88543041	4.74936	0.995977	-0.00581573
RmGQEVPGDSVGPEFAGYVFk	Unambiguous	40S ribosomal protein S6 [Schizosaccharomyces pombe 972h-]	2	1	19113745	M2(Oxidation); K21(Label:13C(6)15N(2))	HCD	0.5862	0	1	1	4529			1.82937e+08	Heavy	Unique	Used	3.83563e+07	182277931	4.75223	0.996186	-0.00551321
VnGAPLSLVQPEILRMk	Unambiguous	40S ribosomal protein S16 [Schizosaccharomyces pombe 972h-]	1	1	19112530	N2(Deamidated); K17(Label:13C(6)15N(2))	HCD	1	0	1	1	4725			2.26067e+08	Heavy	Unique	Used	47562612	2.26067e+08	4.75305	0.996246	-0.00542646
VAGVGLSALFHEk	Unambiguous	40S ribosomal protein S23 [Schizosaccharomyces pombe 972h-]	1	1	19112979	K13(Label:13C(6)15N(2))	HCD	1	0	1	1	4423			4.95049e+09	Heavy	Unique	Used	1040870681	4947927864	4.75364	0.996289	-0.00536402
VYEPILVAGADk	Unambiguous	40S ribosomal protein S16 [Schizosaccharomyces pombe 972h-]	1	1	19112530	K12(Label:13C(6)15N(2))	HCD	1	0	1	1	4086			2.17326e+09	Heavy	Unique	Used	4.5708e+08	2.17326e+09	4.75466	0.996363	-0.0052571
LQEEERERk	Unambiguous	40S ribosomal protein S17 [Schizosaccharomyces pombe 972h-]	2	2	19075512;19112037	K9(Label:13C(6)15N(2))	HCD	1	0	1	1	2672			9.7338e+07	Heavy	Not Unique	Used	2.04721e+07	9.7338e+07	4.75466	0.996363	-0.00525682
VVQSLEK	Unambiguous	40S ribosomal protein S19 [Schizosaccharomyces pombe 972h-]	2	2	19113385;19112013		HCD	1	0	1	1	266			8.26524e+07	Light	Not Unique	Used	8.26524e+07	3.93068e+08	4.75568	0.996437	-0.00514983
FRLILIESRIHRLARYYRk	Unambiguous	40S ribosomal protein S13 [Schizosaccharomyces pombe 972h-]	1	1	19114812	K19(Label:13C(6)15N(2))	HCD	1	0	1	1	5677			2.31155e+09	Heavy	Unique	Used	4.84664e+08	2305352522	4.7566	0.996504	-0.00505239
SFQLLANNVDSk	Unambiguous	40S ribosomal protein S18 [Schizosaccharomyces pombe 972h-]	1	1	19113298	K12(Label:13C(6)15N(2))	HCD	1	0	1	1	1861			2.11273e+09	Heavy	Unique	Used	4.4416e+08	2.11273e+09	4.75668	0.99651	-0.0050439
NREEAAEFAQLmAk	Unambiguous	40S ribosomal protein S6 [Schizosaccharomyces pombe 972h-]	2	1	19113745	M12(Oxidation); K14(Label:13C(6)15N(2))	HCD	1	0	1	1	6440			4.91439e+06	Heavy	Unique	Used	993392	4.72567e+06	4.7571	0.99654	-0.00499976
RALVHDGLARGIREASk	Unambiguous	40S ribosomal protein S12 [Schizosaccharomyces pombe 972h-]	2	1	19111998	K17(Label:13C(6)15N(2))	HCD	1	0	1	1	545			707139802	Heavy	Unique	Used	145892780	694150168	4.75795	0.996602	-0.00491114
VMFAMTQIk	Unambiguous	40S ribosomal protein S18 [Schizosaccharomyces pombe 972h-]	1	1	19113298	K9(Label:13C(6)15N(2))	HCD	1	0	1	1	6832			4.57125e+07	Heavy	Unique	Used	9.39863e+06	4.47196e+07	4.7581	0.996612	-0.00489551
ADADSVVEqILK	Unambiguous	40S ribosomal protein S13 [Schizosaccharomyces pombe 972h-]	1	1	19114812	Q9(Deamidated)	HCD	1	0	1	1	4872			1.10235e+07	Light	Unique	Used	1.05605e+07	5.02609e+07	4.75931	0.996701	-0.00476792
FRALRLDSGNFSWGSEGVSk	Unambiguous	40S ribosomal protein S8 [Schizosaccharomyces pombe 972h-]	2	1	19115431	K20(Label:13C(6)15N(2))	HCD	1	0	1	1	6825			2.17192e+07	Heavy	Unique	Used	4.45637e+06	2.12173e+07	4.76112	0.996832	-0.00457821
VAGVGLSALFHEk	Unambiguous	40S ribosomal protein S23 [Schizosaccharomyces pombe 972h-]	1	1	19112979	K13(Label:13C(6)15N(2))	HCD	1	0	1	1	6878			3.6337e+08	Heavy	Unique	Used	7.61978e+07	3.6337e+08	4.76878	0.997387	-0.00377475
kDDGAAPGGFAPSFRGGFGRPVAA	Unambiguous	40S ribosomal protein S10 [Schizosaccharomyces pombe 972h-]	1	1	19112397	K1(Label:13C(6)15N(2))	HCD	1	0	1	1	1843			2.95809e+08	Heavy	Unique	Used	6.20259e+07	2.95809e+08	4.76912	0.997412	-0.00373885
AIHQALFSQGVLVAK	Unambiguous	40S ribosomal protein S10 [Schizosaccharomyces pombe 972h-]	1	1	19114930		HCD	1	0	1	1	4165			643944646	Light	Unique	Used	643944646	3071926344	4.77048	0.99751	-0.00359608
RLFEGNAIIRRLVRLGILDESRMk	Unambiguous	40S ribosomal protein S9 [Schizosaccharomyces pombe 972h-]	1	1	19112632	K24(Label:13C(6)15N(2))	HCD	1	0	1	1	4773			6.40381e+07	Heavy	Unique	Used	1.34158e+07	6.40381e+07	4.77333	0.997716	-0.00329825
kDDGAAPGGFAPSFRGGFGRPVAA	Unambiguous	40S ribosomal protein S10 [Schizosaccharomyces pombe 972h-]	1	1	19112397	K1(Label:13C(6)15N(2))	HCD	1	0	1	1	6714			6.39768e+08	Heavy	Unique	Used	1.33794e+08	638739630	4.77406	0.997769	-0.0032222
LRNHRREERWADAHYk	Unambiguous	40S ribosomal protein S23 [Schizosaccharomyces pombe 972h-]	1	1	19112979	K16(Label:13C(6)15N(2))	HCD	1	0	1	1	7574			315795931	Heavy	Unique	Used	65649686	313572152	4.77645	0.997942	-0.00297242
TDASAVQAFGLRTHYGGGRTTGFALIYDDVEAMk	Unambiguous	40S ribosomal protein S24 [Schizosaccharomyces pombe 972h-]	1	1	19115165	K34(Label:13C(6)15N(2))	HCD	1	0	1	1	7133			1.46904e+09	Heavy	Unique	Used	305391127	1459017302	4.77754	0.998021	-0.00285845
ALITYDRTLLVADPRRMEPk	Unambiguous	40S ribosomal protein S16 [Schizosaccharomyces pombe 972h-]	1	1	19112530	K20(Label:13C(6)15N(2))	HCD	1	0	1	1	5696			1.1039e+09	Heavy	Unique	Used	2.30925e+08	1.1039e+09	4.78035	0.998223	-0.00256524
VnGAPLSLVQPEILRMk	Unambiguous	40S ribosomal protein S16 [Schizosaccharomyces pombe 972h-]	1	1	19112530	N2(Deamidated); K17(Label:13C(6)15N(2))	HCD	1	0	1	1	4723			1.05587e+09	Heavy	Unique	Used	2.20767e+08	1.05587e+09	4.78272	0.998395	-0.00231717
RASRVVIEk	Unambiguous	40S ribosomal protein S17 [Schizosaccharomyces pombe 972h-]	2	2	19075512;19112037	K9(Label:13C(6)15N(2))	HCD	1	0	1	1	5905			1.1845e+07	Heavy	Not Unique	Used	2.47635e+06	1.1845e+07	4.78326	0.998434	-0.0022613
EVATAIRGAIImGk	Unambiguous	40S ribosomal protein S2 [Schizosaccharomyces pombe 972h-]	1	1	19075935	M12(Oxidation); K14(Label:13C(6)15N(2))	HCD	1	0	1	1	1518			535830504	Heavy	Unique	Used	112015401	535830504	4.78354	0.998454	-0.00223184
VNGAPLSLVQPEILRMk	Unambiguous	40S ribosomal protein S16 [Schizosaccharomyces pombe 972h-]	1	1	19112530	K17(Label:13C(6)15N(2))	HCD	1	0	1	1	4675			3.79331e+08	Heavy	Unique	Used	7.89934e+07	3.77913e+08	4.78411	0.998495	-0.00217303
AIHQALFQQGVLVAk	Unambiguous	40S ribosomal protein S10 [Schizosaccharomyces pombe 972h-]	1	1	19112397	K15(Label:13C(6)15N(2))	HCD	1	0	1	1	4069			7458731536	Heavy	Unique	Used	1558548746	7458731536	4.78569	0.998609	-0.00200817
FMTNRLLQRK	Unambiguous	40S ribosomal protein S24 [Schizosaccharomyces pombe 972h-]	2	2	19112688;19115165		HCD	1	0	1	1	3104			448429456	Light	Not Unique	Used	448429456	2146145898	4.78592	0.998625	-0.00198462
AILMQRLIQVDGk	Unambiguous	40S ribosomal protein S4 [Schizosaccharomyces pombe 972h-]	1	1	19112469	K13(Label:13C(6)15N(2))	HCD	1	0	1	1	2017			3.23778e+06	Heavy	Unique	Used	676497	3.23778e+06	4.78609	0.998638	-0.0019662
IAGYTTHLmK	Unambiguous	40S ribosomal protein S17 [Schizosaccharomyces pombe 972h-]	2	2	19075512;19112037	M9(Oxidation)	HCD	1	0	1	1	567			969531584	Light	Not Unique	Used	969531584	4644302992	4.79025	0.998938	-0.00153324
GDIPGVRFk	Unambiguous	40S ribosomal protein S23 [Schizosaccharomyces pombe 972h-]	1	1	19112979	K9(Label:13C(6)15N(2))	HCD	1	0	1	1	3387			7.23136e+09	Heavy	Unique	Used	1508453870	7226691632	4.79079	0.998977	-0.00147716
GmSPSQIGVTLRDSHGIPQVRFITGQk	Unambiguous	40S ribosomal protein S13 [Schizosaccharomyces pombe 972h-]	1	1	19114812	M2(Oxidation); K27(Label:13C(6)15N(2))	HCD	0.3478	0	1	1	7840			9.58761e+08	Heavy	Unique	Used	1.99852e+08	957489893	4.791	0.998991	-0.0014562
DQYVPEVSELEk	Unambiguous	40S ribosomal protein S17 [Schizosaccharomyces pombe 972h-]	1	1	19075512	K12(Label:13C(6)15N(2))	HCD	1	0	1	1	6741			421290476	Heavy	Unique	Used	8.79128e+07	421290476	4.79214	0.999074	-0.00133704
NREEAAEFAQLmAk	Unambiguous	40S ribosomal protein S6 [Schizosaccharomyces pombe 972h-]	2	1	19113745	M12(Oxidation); K14(Label:13C(6)15N(2))	HCD	1	0	1	1	1380			6.36898e+07	Heavy	Unique	Used	1.32213e+07	6.33761e+07	4.79349	0.999171	-0.00119664
RIVDEVAIIASK	Unambiguous	40S ribosomal protein S17 [Schizosaccharomyces pombe 972h-]	2	2	19075512;19112037		HCD	1	0	1	1	6700			5.45148e+07	Light	Not Unique	Used	5.45148e+07	261430566	4.79559	0.999322	-0.000978915
IAGYTTHLmK	Unambiguous	40S ribosomal protein S17 [Schizosaccharomyces pombe 972h-]	2	2	19075512;19112037	M9(Oxidation)	HCD	1	0	1	1	3128			6.64836e+07	Light	Not Unique	Used	6.64836e+07	318832750	4.79566	0.999327	-0.000971962
QMVVDILHPGk	Unambiguous	40S ribosomal protein S24 [Schizosaccharomyces pombe 972h-]	2	2	19112688;19115165	K11(Label:13C(6)15N(2))	HCD	1	0	1	1	4077			2.24738e+09	Heavy	Not Unique	Used	466349594	2236551060	4.79587	0.999342	-0.000950163
TTYAQSSQIRAIHQk	Unambiguous	40S ribosomal protein S1 [Schizosaccharomyces pombe 972h-]	1	1	19113740	K15(Label:13C(6)15N(2))	HCD	1	0	1	1	5994			1.16404e+06	Heavy	Unique	Used	232479	1.1153e+06	4.79742	0.999453	-0.000789003
LSIMPIRRGYWGTALGDPHTVPVk	Unambiguous	40S ribosomal protein S2 [Schizosaccharomyces pombe 972h-]	1	1	19075935	K24(Label:13C(6)15N(2))	HCD	1	0	1	1	5714			282303631	Heavy	Unique	Used	5.86301e+07	281274372	4.79744	0.999455	-0.000787149
FmTNRLLQRK	Unambiguous	40S ribosomal protein S24 [Schizosaccharomyces pombe 972h-]	2	2	19112688;19115165	M2(Oxidation)	HCD	1	0	1	1	2926			2.73718e+08	Light	Not Unique	Used	2.73718e+08	1.31354e+09	4.7989	0.99956	-0.000635492
SFQLLANNVDSk	Unambiguous	40S ribosomal protein S18 [Schizosaccharomyces pombe 972h-]	1	1	19113298	K12(Label:13C(6)15N(2))	HCD	1	0	1	1	6738			2.79048e+08	Heavy	Unique	Used	50344318	241625408	4.79946	0.9996	-0.000577913
TDASAVQAFGLRTHYGGGRTTGFALIYDDVEAMk	Unambiguous	40S ribosomal protein S24 [Schizosaccharomyces pombe 972h-]	1	1	19115165	K34(Label:13C(6)15N(2))	HCD	1	0	1	1	7121			235926803	Heavy	Unique	Used	4.82175e+07	231427778	4.79967	0.999615	-0.000556211
SSPFGGSSHAk	Unambiguous	40S ribosomal protein S23 [Schizosaccharomyces pombe 972h-]	1	1	19112979	K11(Label:13C(6)15N(2))	HCD	1	0	1	1	394			6.51747e+08	Heavy	Unique	Used	1.35762e+08	6.51747e+08	4.80065	0.999685	-0.000454406
VMFAmTQIk	Unambiguous	40S ribosomal protein S18 [Schizosaccharomyces pombe 972h-]	1	1	19113298	M5(Oxidation); K9(Label:13C(6)15N(2))	HCD	1	0	1	1	1473			606236432	Heavy	Unique	Used	126176855	606236432	4.80466	0.999973	-3.95567e-05
TTYAQSSQIRAIRQk	Unambiguous	40S ribosomal protein S1 [Schizosaccharomyces pombe 972h-]	1	1	19114028	K15(Label:13C(6)15N(2))	HCD	1	0	1	1	6014			2.89234e+06	Heavy	Unique	Used	598201	2.87438e+06	4.80504	1	0
DQYVPEVSELEVDRVNVDQDTk	Unambiguous	40S ribosomal protein S17 [Schizosaccharomyces pombe 972h-]	1	1	19112037	K22(Label:13C(6)15N(2))	HCD	1	0	1	1	2035			9.90921e+07	Heavy	Unique	Used	2.05312e+07	98653230	4.80504	1	6.22918e-07
LQEEERERK	Unambiguous	40S ribosomal protein S17 [Schizosaccharomyces pombe 972h-]	2	2	19075512;19112037		HCD	1	0	1	1	5864			8.11515e+06	Light	Not Unique	Used	8.11515e+06	3.89966e+07	4.8054	1.00003	3.74778e-05
LSITEERDRRRALk	Unambiguous	40S ribosomal protein S4 [Schizosaccharomyces pombe 972h-]	3	2	19112469;19113142	K14(Label:13C(6)15N(2))	HCD	1	0	1	1	5338			8.44655e+07	Heavy	Not Unique	Used	1.73751e+07	8.35388e+07	4.80795	1.00021	0.000300739
QmVVDILHPGK	Unambiguous	40S ribosomal protein S24 [Schizosaccharomyces pombe 972h-]	2	2	19112688;19115165	M2(Oxidation)	HCD	1	0	1	1	3683			2.87219e+07	Light	Not Unique	Used	2.87219e+07	138274617	4.81425	1.00066	0.000951252
RRSDGIHIINLGk	Unambiguous	40S ribosomal protein S0B [Schizosaccharomyces pombe 972h-]	1	1	19115325	K13(Label:13C(6)15N(2))	HCD	1	0	1	1	1041			1.56162e+08	Heavy	Unique	Used	3.24371e+07	1.56162e+08	4.81429	1.00066	0.000955654
VnGAPLSLVQPEILRMk	Unambiguous	40S ribosomal protein S16 [Schizosaccharomyces pombe 972h-]	1	1	19112530	N2(Deamidated); K17(Label:13C(6)15N(2))	HCD	1	0	1	1	7041			7.17341e+07	Heavy	Unique	Used	1.47271e+07	7.09053e+07	4.81461	1.00069	0.000988653
AIVVFVPQPLLK	Unambiguous	40S ribosomal protein S7 [Schizosaccharomyces pombe 972h-]	1	1	19114589		HCD	1	0	1	1	4857			9.18118e+06	Light	Unique	Used	9.18118e+06	4.42073e+07	4.81498	1.00071	0.001027
GMSPSQIGVTLRDSHGIPQVRFITGQk	Unambiguous	40S ribosomal protein S13 [Schizosaccharomyces pombe 972h-]	1	1	19114812	K27(Label:13C(6)15N(2))	HCD	1	0	1	1	7870			5.51375e+08	Heavy	Unique	Used	1.14346e+08	5.50844e+08	4.81733	1.00088	0.0012684
LIPEVIGRAIEk	Unambiguous	40S ribosomal protein S1 [Schizosaccharomyces pombe 972h-]	1	1	19113740	K12(Label:13C(6)15N(2))	HCD	1	0	1	1	1897			1.44495e+07	Heavy	Unique	Used	2.99176e+06	1.44144e+07	4.81801	1.00093	0.0013389
FADGFMIHSGQPAVDFIDSATRHVLLRQGVLGVk	Unambiguous	40S ribosomal protein S3 [Schizosaccharomyces pombe 972h-]	1	1	19113555	K34(Label:13C(6)15N(2))	HCD	1	0	1	1	5835			7.33101e+07	Heavy	Unique	Used	1.49398e+07	7.20295e+07	4.82132	1.00117	0.00167979
VYGGSVNRGMRPSHHRDGSGSVQRk	Unambiguous	40S ribosomal protein S19 [Schizosaccharomyces pombe 972h-]	2	2	19113385;19112013	K25(Label:13C(6)15N(2))	HCD	1	0	1	1	7566			5.02849e+06	Heavy	Not Unique	Used	904093	4.35973e+06	4.82221	1.00123	0.00177095
TDASAVQAFGLRTHYGGGRTTGFALIYDDVEAmk	Unambiguous	40S ribosomal protein S24 [Schizosaccharomyces pombe 972h-]	1	1	19115165	M33(Oxidation); K34(Label:13C(6)15N(2))	HCD	1	0	1	1	4642			9.8151e+08	Heavy	Unique	Used	2.02141e+08	975036794	4.82354	1.00132	0.00190749
EVSLDETGHIK	Unambiguous	40S ribosomal protein S5 [Schizosaccharomyces pombe 972h-]	1	1	19115124		HCD	1	0	1	1	1001			1.00294e+07	Light	Unique	Used	1.00294e+07	48392630	4.8251	1.00143	0.00206778
QPHIFQNAk	Unambiguous	40S ribosomal protein S11 [Schizosaccharomyces pombe 972h-]	1	1	19115584	K9(Label:13C(6)15N(2))	HCD	1	0	1	1	476			6.69528e+08	Heavy	Unique	Used	1.38352e+08	667937535	4.82781	1.00163	0.0023462
IQTHRGLRHALDLRVRGQHTk	Unambiguous	40S ribosomal protein S18 [Schizosaccharomyces pombe 972h-]	1	1	19113298	K21(Label:13C(6)15N(2))	HCD	1	0	1	1	5332			8.17804e+08	Heavy	Unique	Used	1.68684e+08	814381865	4.82786	1.00163	0.0023518
RRSDGIHIINLGk	Unambiguous	40S ribosomal protein S0B [Schizosaccharomyces pombe 972h-]	1	1	19115325	K13(Label:13C(6)15N(2))	HCD	1	0	1	1	3227			1.63898e+08	Heavy	Unique	Used	3.37915e+07	163231433	4.83055	1.00182	0.002627
GRILEVSLADLQk	Unambiguous	40S ribosomal protein S1 [Schizosaccharomyces pombe 972h-]	2	2	19114028;19113740	K13(Label:13C(6)15N(2))	HCD	1	0	1	1	6821			2.10291e+07	Heavy	Not Unique	Used	4.23474e+06	2.04581e+07	4.83102	1.00186	0.00267608
FPFEGVEVk	Unambiguous	40S ribosomal protein S5 [Schizosaccharomyces pombe 972h-]	2	1	19115124	K9(Label:13C(6)15N(2))	HCD	1	0	1	1	6823			5.37154e+07	Heavy	Unique	Used	1.08724e+07	5.25428e+07	4.83267	1.00197	0.00284443
IRRAARELLTLDEk	Unambiguous	40S ribosomal protein S9 [Schizosaccharomyces pombe 972h-]	2	2	19112632;19113857	K14(Label:13C(6)15N(2))	HCD	1	0	1	1	961			1.82763e+08	Heavy	Not Unique	Used	3.74136e+07	180860692	4.83409	1.00207	0.00298994
IPSWFLNRQk	Unambiguous	40S ribosomal protein S18 [Schizosaccharomyces pombe 972h-]	1	1	19113298	K10(Label:13C(6)15N(2))	HCD	1	0	1	1	6744			1.0641e+08	Heavy	Unique	Used	2.16327e+07	104623975	4.83637	1.00224	0.00322364
RASRVVIEk	Unambiguous	40S ribosomal protein S17 [Schizosaccharomyces pombe 972h-]	2	2	19075512;19112037	K9(Label:13C(6)15N(2))	HCD	1	0	1	1	2696			1.51356e+08	Heavy	Not Unique	Used	3.08937e+07	149445450	4.8374	1.00231	0.00332937
RALVHDGLARGIREASk	Unambiguous	40S ribosomal protein S12 [Schizosaccharomyces pombe 972h-]	2	1	19111998	K17(Label:13C(6)15N(2))	HCD	1	0	1	1	505			8.55947e+08	Heavy	Unique	Used	1.76528e+08	854066856	4.83813	1.00236	0.00340322
IAGYTTHLmK	Unambiguous	40S ribosomal protein S17 [Schizosaccharomyces pombe 972h-]	2	2	19075512;19112037	M9(Oxidation)	HCD	1	0	1	1	6060			1.12599e+07	Light	Not Unique	Used	1.12599e+07	5.44809e+07	4.83848	1.00239	0.00343944
IRRFFNLSk	Unambiguous	40S ribosomal protein S6 [Schizosaccharomyces pombe 972h-]	2	1	19113745	K9(Label:13C(6)15N(2))	HCD	1	0	1	1	3344			6.94667e+08	Heavy	Unique	Used	1.43555e+08	6.94667e+08	4.83904	1.00243	0.0034972
SIHHARVLIFQRHIRVGk	Unambiguous	40S ribosomal protein S9 [Schizosaccharomyces pombe 972h-]	2	2	19112632;19113857	K18(Label:13C(6)15N(2))	HCD	1	0	1	1	2356			1.26471e+08	Heavy	Not Unique	Used	2.55381e+07	123581121	4.83908	1.00243	0.00350087
RIQRGPVRGISFK	Unambiguous	40S ribosomal protein S17 [Schizosaccharomyces pombe 972h-]	2	2	19075512;19112037		HCD	1	0	1	1	6051			1.91063e+07	Light	Not Unique	Used	1.91063e+07	9.24823e+07	4.84041	1.00252	0.0036371
IPSWFLNRQk	Unambiguous	40S ribosomal protein S18 [Schizosaccharomyces pombe 972h-]	1	1	19113298	K10(Label:13C(6)15N(2))	HCD	1	0	1	1	1865			3.11113e+08	Heavy	Unique	Used	6.4117e+07	310355388	4.84045	1.00253	0.00364114
VmFAMTQIk	Unambiguous	40S ribosomal protein S18 [Schizosaccharomyces pombe 972h-]	1	1	19113298	M2(Oxidation); K9(Label:13C(6)15N(2))	HCD	1	0	1	1	6673			6.19265e+07	Heavy	Unique	Used	1.27597e+07	6.17972e+07	4.84314	1.00272	0.00391592
LLATRIVk	Unambiguous	40S ribosomal protein S5 [Schizosaccharomyces pombe 972h-]	2	1	19115124	K8(Label:13C(6)15N(2))	HCD	1	0	1	1	6118			7.78122e+06	Heavy	Unique	Used	1.60664e+06	7.78122e+06	4.84316	1.00272	0.00391817
QPHIFQNAk	Unambiguous	40S ribosomal protein S11 [Schizosaccharomyces pombe 972h-]	1	1	19115584	K9(Label:13C(6)15N(2))	HCD	1	0	1	1	6016			1.27685e+07	Heavy	Unique	Used	2.62821e+06	1.27346e+07	4.84536	1.00288	0.00414182
VARQQRk	Unambiguous	40S ribosomal protein S24 [Schizosaccharomyces pombe 972h-]	2	2	19112688;19115165	K7(Label:13C(6)15N(2))	HCD	1	0	1	1	39			1.85066e+07	Heavy	Not Unique	Used	3.81925e+06	1.85066e+07	4.8456	1.00289	0.00416689
FmTNRLLQRk	Unambiguous	40S ribosomal protein S24 [Schizosaccharomyces pombe 972h-]	2	2	19112688;19115165	M2(Oxidation); K10(Label:13C(6)15N(2))	HCD	1	0	1	1	550			5.1645e+09	Heavy	Not Unique	Used	1065786416	5.1645e+09	4.84572	1.0029	0.00417847
GMSPSQIGVTLRDSHGIPQVRFITGQk	Unambiguous	40S ribosomal protein S13 [Schizosaccharomyces pombe 972h-]	1	1	19114812	K27(Label:13C(6)15N(2))	HCD	1	0	1	1	7864			7.13659e+08	Heavy	Unique	Used	1.47026e+08	712480356	4.84596	1.00292	0.00420311
TDASAVQAFGLRTHYGGGRTTGFALIYDDVEAmk	Unambiguous	40S ribosomal protein S24 [Schizosaccharomyces pombe 972h-]	1	1	19115165	M33(Oxidation); K34(Label:13C(6)15N(2))	HCD	1	0	1	1	7530			1.6678e+06	Heavy	Unique	Used	324386	1.57287e+06	4.84877	1.00312	0.00449013
SIHHARVLIFQRHIRVGk	Unambiguous	40S ribosomal protein S9 [Schizosaccharomyces pombe 972h-]	2	2	19112632;19113857	K18(Label:13C(6)15N(2))	HCD	1	0	1	1	5365			7.83731e+07	Heavy	Not Unique	Used	1.46819e+07	71207804	4.85004	1.00321	0.00461924
LQEEERERk	Unambiguous	40S ribosomal protein S17 [Schizosaccharomyces pombe 972h-]	2	2	19075512;19112037	K9(Label:13C(6)15N(2))	HCD	1	0	1	1	147			7.10964e+07	Heavy	Not Unique	Used	1.44647e+07	7.01572e+07	4.85024	1.00322	0.00463988
DISLVDYITIGNGQPLPHTAGRFQTk	Unambiguous	40S ribosomal protein S5 [Schizosaccharomyces pombe 972h-]	2	1	19115124	K26(Label:13C(6)15N(2))	HCD	1	0	1	1	4722			208719423	Heavy	Unique	Used	4.30157e+07	208719423	4.85217	1.00336	0.00483571
ADADSVVEQILk	Unambiguous	40S ribosomal protein S13 [Schizosaccharomyces pombe 972h-]	1	1	19114812	K12(Label:13C(6)15N(2))	HCD	1	0	1	1	2062			1.58924e+07	Heavy	Unique	Used	3.24961e+06	1.5768e+07	4.85228	1.00337	0.00484687
DISLVDYITIGnGQPLPHTAGRFQTk	Unambiguous	40S ribosomal protein S5 [Schizosaccharomyces pombe 972h-]	2	1	19115124	N12(Deamidated); K26(Label:13C(6)15N(2))	HCD	0.1286	0	1	1	4746			2.34318e+08	Heavy	Unique	Used	4.80859e+07	2.3344e+08	4.85464	1.00353	0.00508781
HPEVGVPNLQVIk	Unambiguous	40S ribosomal protein S10 [Schizosaccharomyces pombe 972h-]	2	2	19114930;19112397	K13(Label:13C(6)15N(2))	HCD	1	0	1	1	6661			390167774	Heavy	Not Unique	Used	8.03541e+07	390167774	4.8556	1.0036	0.00518555
VMFAMTQIk	Unambiguous	40S ribosomal protein S18 [Schizosaccharomyces pombe 972h-]	1	1	19113298	K9(Label:13C(6)15N(2))	HCD	1	0	1	1	4578			95036401	Heavy	Unique	Used	1.72551e+07	83784088	4.85562	1.0036	0.00518758
SSPFGGSSHAk	Unambiguous	40S ribosomal protein S23 [Schizosaccharomyces pombe 972h-]	1	1	19112979	K11(Label:13C(6)15N(2))	HCD	1	0	1	1	2733			8.48847e+08	Heavy	Unique	Used	1.74274e+08	846541197	4.85754	1.00374	0.0053823
ADADSVVEQILk	Unambiguous	40S ribosomal protein S13 [Schizosaccharomyces pombe 972h-]	1	1	19114812	K12(Label:13C(6)15N(2))	HCD	1	0	1	1	2177			1.87888e+06	Heavy	Unique	Used	386792	1.87888e+06	4.85761	1.00374	0.00538891
VmFAMTQIk	Unambiguous	40S ribosomal protein S18 [Schizosaccharomyces pombe 972h-]	1	1	19113298	M2(Oxidation); K9(Label:13C(6)15N(2))	HCD	1	0	1	1	1798			2.74237e+08	Heavy	Unique	Used	5.61087e+07	272660346	4.8595	1.00388	0.00558167
RIQRGPVRGISFk	Unambiguous	40S ribosomal protein S17 [Schizosaccharomyces pombe 972h-]	2	2	19075512;19112037	K13(Label:13C(6)15N(2))	HCD	1	0	1	1	2898			1591980394	Heavy	Not Unique	Used	3.275e+08	1591980394	4.86101	1.00398	0.00573441
VGALPPTWk	Unambiguous	40S ribosomal protein S13 [Schizosaccharomyces pombe 972h-]	1	1	19114812	K9(Label:13C(6)15N(2))	HCD	1	0	1	1	6639		1	15770600	Heavy	Unique	Used	3.24305e+06	15770600	4.86289	1.00412	0.0059249
FELGRQPSnTRIGPk	Unambiguous	40S ribosomal protein S8 [Schizosaccharomyces pombe 972h-]	2	1	19115431	N9(Deamidated); K15(Label:13C(6)15N(2))	HCD	0.0889	0	1	1	3314			3.21322e+07	Heavy	Unique	Used	5.65207e+06	27486335	4.86306	1.00413	0.00594205
AIHQALFQQGVLVAk	Unambiguous	40S ribosomal protein S10 [Schizosaccharomyces pombe 972h-]	1	1	19112397	K15(Label:13C(6)15N(2))	HCD	1	0	1	1	4068			3901338340	Heavy	Unique	Used	800529522	3893770980	4.86399	1.00419	0.00603725
IAGYTTHLMk	Unambiguous	40S ribosomal protein S17 [Schizosaccharomyces pombe 972h-]	2	2	19075512;19112037	K10(Label:13C(6)15N(2))	HCD	1	0	1	1	3298			2.85681e+08	Heavy	Not Unique	Used	5.79373e+07	281855244	4.86483	1.00425	0.00612225
VGALPPTWk	Unambiguous	40S ribosomal protein S13 [Schizosaccharomyces pombe 972h-]	1	1	19114812	K9(Label:13C(6)15N(2))	HCD	1	0	1	1	3965			3.16173e+08	Heavy	Unique	Used	64129952	312084548	4.86644	1.00437	0.00628506
LLAGLAVRRAAYGVLRYVMEAGAk	Unambiguous	40S ribosomal protein S3 [Schizosaccharomyces pombe 972h-]	1	1	19113555	K24(Label:13C(6)15N(2))	HCD	1	0	1	1	5843			6.30366e+06	Heavy	Unique	Used	1.2524e+06	6.09633e+06	4.86772	1.00446	0.00641514
THLRNMIILPEMVGSVVGIYNGk	Unambiguous	40S ribosomal protein S15 [Schizosaccharomyces pombe 972h-]	2	1	19075461	K23(Label:13C(6)15N(2))	HCD	1	0	1	1	4979			31110947	Heavy	Unique	Used	6.38657e+06	31110947	4.87131	1.00471	0.00677758
DISLVDYITIGnGQPLPHTAGRFQTk	Unambiguous	40S ribosomal protein S5 [Schizosaccharomyces pombe 972h-]	2	1	19115124	N12(Deamidated); K26(Label:13C(6)15N(2))	HCD	0.1667	0	1	1	7045			2.33014e+08	Heavy	Unique	Used	47371446	2.30979e+08	4.87592	1.00503	0.00724385
VGALPPTWk	Unambiguous	40S ribosomal protein S13 [Schizosaccharomyces pombe 972h-]	1	1	19114812	K9(Label:13C(6)15N(2))	HCD	1	0	1	1	3758		1	6.0929e+09	Heavy	Unique	Used	785562304	3831230208	4.87705	1.00511	0.00735828
GMSPSQIGVTLRDSHGIPQVRFITGQk	Unambiguous	40S ribosomal protein S13 [Schizosaccharomyces pombe 972h-]	1	1	19114812	K27(Label:13C(6)15N(2))	HCD	1	0	1	1	4454			1.92517e+09	Heavy	Unique	Used	393752398	1921061928	4.87886	1.00524	0.00754021
AIVAYYQk	Unambiguous	40S ribosomal protein S16 [Schizosaccharomyces pombe 972h-]	1	1	19112530	K8(Label:13C(6)15N(2))	HCD	1	0	1	1	6236			6.15774e+07	Heavy	Unique	Used	1.24894e+07	6.09795e+07	4.8825	1.0055	0.00790736
KDDGAAPGGFAPSFRGGFGRPVAA	Unambiguous	40S ribosomal protein S10 [Schizosaccharomyces pombe 972h-]	1	1	19112397		HCD	1	0	1	1	4192			2.66141e+08	Light	Unique	Used	2.66141e+08	1.29944e+09	4.88251	1.0055	0.00790883
YYPRLTLDFQTNK	Unambiguous	40S ribosomal protein S17 [Schizosaccharomyces pombe 972h-]	2	2	19075512;19112037		HCD	1	0	1	1	6840			1.6116e+08	Light	Not Unique	Used	1.6116e+08	786971089	4.88316	1.00554	0.0079738
LLELHGESQDVGTK	Unambiguous	40S ribosomal protein S1 [Schizosaccharomyces pombe 972h-]	1	1	19114028		HCD	1	0	1	1	3256			9.27627e+07	Light	Unique	Used	9.27627e+07	452986458	4.88328	1.00555	0.00798641
RmGQEVPGDSVGPEFAGYVFk	Unambiguous	40S ribosomal protein S6 [Schizosaccharomyces pombe 972h-]	2	1	19113745	M2(Oxidation); K21(Label:13C(6)15N(2))	HCD	0.6023	0	1	1	6922			5.68372e+07	Heavy	Unique	Used	1.14922e+07	5.6149e+07	4.88585	1.00573	0.00824441
MHRTIIIRREYLHFIPk	Unambiguous	40S ribosomal protein S11 [Schizosaccharomyces pombe 972h-]	1	1	19115584	K17(Label:13C(6)15N(2))	HCD	1	0	1	1	5584			9.85991e+07	Heavy	Unique	Used	1.99919e+07	97688924	4.88642	1.00577	0.00830165
FRLILIESRIHRLARYYRk	Unambiguous	40S ribosomal protein S13 [Schizosaccharomyces pombe 972h-]	1	1	19114812	K19(Label:13C(6)15N(2))	HCD	1	0	1	1	2583			1.53446e+08	Heavy	Unique	Used	3.1384e+07	1.53446e+08	4.88932	1.00597	0.00859325
QGEQDIPGLTDVTVPk	Unambiguous	40S ribosomal protein S6 [Schizosaccharomyces pombe 972h-]	2	1	19113745	K16(Label:13C(6)15N(2))	HCD	1	0	1	1	4414		1	15125956	Heavy	Unique	Used	3.09295e+06	15125956	4.89047	1.00605	0.00870867
NREEAAEFAQLMAk	Unambiguous	40S ribosomal protein S6 [Schizosaccharomyces pombe 972h-]	2	1	19113745	K14(Label:13C(6)15N(2))	HCD	1	0	1	1	4231			380144784	Heavy	Unique	Used	77671396	380144784	4.89427	1.00632	0.00909067
QIVNVPSFVVRLDTQk	Unambiguous	40S ribosomal protein S9 [Schizosaccharomyces pombe 972h-]	1	1	19113857	K16(Label:13C(6)15N(2))	HCD	1	0	1	1	4644			259414934	Heavy	Unique	Used	5.29973e+07	259414934	4.89487	1.00636	0.00915082
mTTPQWIDIVk	Unambiguous	40S ribosomal protein S19 [Schizosaccharomyces pombe 972h-]	2	2	19113385;19112013	M1(Oxidation); K11(Label:13C(6)15N(2))	HCD	1	0	1	1	2103			3.24925e+06	Heavy	Not Unique	Used	663512	3.24925e+06	4.89705	1.00652	0.00936966
RLFEGNAIIRRLVRLGILDESRmk	Unambiguous	40S ribosomal protein S9 [Schizosaccharomyces pombe 972h-]	1	1	19112632	M23(Oxidation); K24(Label:13C(6)15N(2))	HCD	1	0	1	1	7905			9.42299e+07	Heavy	Unique	Used	1.92406e+07	9.42299e+07	4.89744	1.00654	0.00940841
QpNSAIRk	Unambiguous	40S ribosomal protein S23 [Schizosaccharomyces pombe 972h-]	1	1	19112979	P2(Dioxidation); K8(Label:13C(6)15N(2))	HCD	1	0	1	1	53			5.11923e+07	Heavy	Unique	Used	1.02442e+07	5.0199e+07	4.90024	1.00674	0.00968917
IAGYTTHLmK	Unambiguous	40S ribosomal protein S17 [Schizosaccharomyces pombe 972h-]	2	2	19075512;19112037	M9(Oxidation)	HCD	1	0	1	1	696			1.28361e+08	Light	Not Unique	Used	1.28361e+08	629022361	4.9004	1.00675	0.00970491
AIHQALFQQGVLVAk	Unambiguous	40S ribosomal protein S10 [Schizosaccharomyces pombe 972h-]	1	1	19112397	K15(Label:13C(6)15N(2))	HCD	1	0	1	1	1803			1.03711e+09	Heavy	Unique	Used	2.11565e+08	1.03711e+09	4.90209	1.00687	0.00987455
YALnGREVk	Unambiguous	40S ribosomal protein S4 [Schizosaccharomyces pombe 972h-]	3	2	19112469;19113142	N4(Deamidated); K9(Label:13C(6)15N(2))	HCD	1	0	1	1	2959			1.12945e+08	Heavy	Not Unique	Used	2.27565e+07	1.11557e+08	4.90218	1.00687	0.00988358
QMVVDILHPGk	Unambiguous	40S ribosomal protein S24 [Schizosaccharomyces pombe 972h-]	2	2	19112688;19115165	K11(Label:13C(6)15N(2))	HCD	1	0	1	1	1933			8.18332e+07	Heavy	Not Unique	Used	1.62694e+07	79788309	4.90419	1.00701	0.0100846
RIVDEVAIIASK	Unambiguous	40S ribosomal protein S17 [Schizosaccharomyces pombe 972h-]	2	2	19075512;19112037		HCD	1	0	1	1	4355			5.86477e+07	Light	Not Unique	Used	5.86477e+07	287716450	4.90585	1.00713	0.0102499
AIVAYYQk	Unambiguous	40S ribosomal protein S16 [Schizosaccharomyces pombe 972h-]	1	1	19112530	K8(Label:13C(6)15N(2))	HCD	1	0	1	1	3253			1047375059	Heavy	Unique	Used	2.13395e+08	1047375059	4.90816	1.00729	0.0104806
VGALPPTWK	Unambiguous	40S ribosomal protein S13 [Schizosaccharomyces pombe 972h-]	1	1	19114812		HCD	1	0	1	1	6528		1	25313832	Light	Unique	Used	25313832	124279224	4.90954	1.00739	0.0106187
TDASAVQAFGLRTHYGGGRTTGFALIYDDVEAmk	Unambiguous	40S ribosomal protein S24 [Schizosaccharomyces pombe 972h-]	1	1	19115165	M33(Oxidation); K34(Label:13C(6)15N(2))	HCD	1	0	1	1	7492			1.73237e+07	Heavy	Unique	Used	3.34368e+06	16421366	4.91117	1.0075	0.010781
QMVVDILHPGk	Unambiguous	40S ribosomal protein S24 [Schizosaccharomyces pombe 972h-]	2	2	19112688;19115165	K11(Label:13C(6)15N(2))	HCD	1	0	1	1	4342			2.49457e+08	Heavy	Not Unique	Used	49374087	242490388	4.91129	1.00751	0.0107933
SSPFGGSSHAK	Unambiguous	40S ribosomal protein S23 [Schizosaccharomyces pombe 972h-]	1	1	19112979		HCD	1	0	1	1	205			3.66615e+08	Light	Unique	Used	3.66615e+08	1801213514	4.91309	1.00763	0.0109727
VMFAmTQIk	Unambiguous	40S ribosomal protein S18 [Schizosaccharomyces pombe 972h-]	1	1	19113298	M5(Oxidation); K9(Label:13C(6)15N(2))	HCD	1	0	1	1	3792			8.83321e+07	Heavy	Unique	Used	16794136	82514626	4.9133	1.00765	0.0109939
FEPHYRLVRVGQAEPIQk	Unambiguous	40S ribosomal protein S24 [Schizosaccharomyces pombe 972h-]	1	1	19112688	K18(Label:13C(6)15N(2))	HCD	1	0	1	1	3439			4.87742e+08	Heavy	Unique	Used	9.85974e+07	484616345	4.9151	1.00777	0.0111733
RAGELTTEELERIVTIIQNPSQFk	Unambiguous	40S ribosomal protein S18 [Schizosaccharomyces pombe 972h-]	1	1	19113298	K24(Label:13C(6)15N(2))	HCD	1	0	1	1	2200			2.69317e+06	Heavy	Unique	Used	536049	2.63595e+06	4.91737	1.00793	0.0113996
SSPFGGSSHAk	Unambiguous	40S ribosomal protein S23 [Schizosaccharomyces pombe 972h-]	1	1	19112979	K11(Label:13C(6)15N(2))	HCD	1	0	1	1	2730			1.38176e+09	Heavy	Unique	Used	2.80904e+08	1.38176e+09	4.91898	1.00804	0.0115594
RIqRGPVRGISFk	Unambiguous	40S ribosomal protein S17 [Schizosaccharomyces pombe 972h-]	2	2	19075512;19112037	Q3(Deamidated); K13(Label:13C(6)15N(2))	HCD	1	0	1	1	2968			1.04785e+08	Heavy	Not Unique	Used	2.12961e+07	1.04785e+08	4.92037	1.00814	0.0116981
THLRNmIILPEMVGSVVGIYnGk	Unambiguous	40S ribosomal protein S15 [Schizosaccharomyces pombe 972h-]	2	1	19075461	M6(Oxidation); N21(Deamidated); K23(Label:13C(6)15N(2))	HCD	1	0	1	1	4877			1.58361e+07	Heavy	Unique	Used	2.71455e+06	1.3359e+07	4.92127	1.0082	0.0117878
VYEPILVAGADk	Unambiguous	40S ribosomal protein S16 [Schizosaccharomyces pombe 972h-]	1	1	19112530	K12(Label:13C(6)15N(2))	HCD	1	0	1	1	1819			3.94819e+08	Heavy	Unique	Used	8.01084e+07	3.94819e+08	4.92856	1.00871	0.0125112
ADADSVVEQILk	Unambiguous	40S ribosomal protein S13 [Schizosaccharomyces pombe 972h-]	1	1	19114812	K12(Label:13C(6)15N(2))	HCD	1	0	1	1	5016			2368668760	Heavy	Unique	Used	478095324	2357095576	4.93018	1.00882	0.0126718
NLLAADSHIGSk	Unambiguous	40S ribosomal protein S0B [Schizosaccharomyces pombe 972h-]	1	1	19115325	K12(Label:13C(6)15N(2))	HCD	1	0	1	1	1048			1.42161e+08	Heavy	Unique	Used	2.83908e+07	140014793	4.9317	1.00893	0.0128229
IQTHRGLRHALDLRVRGQHTK	Unambiguous	40S ribosomal protein S18 [Schizosaccharomyces pombe 972h-]	1	1	19113298		HCD	1	0	1	1	251			74074806	Light	Unique	Used	74074806	365387975	4.93269	1.009	0.0129205
FEPHYRLVRVGHAEPIQK	Unambiguous	40S ribosomal protein S24 [Schizosaccharomyces pombe 972h-]	1	1	19115165		HCD	1	0	1	1	3193			3.40124e+07	Light	Unique	Used	3.40124e+07	1.67798e+08	4.93343	1.00905	0.0129942
APAFFEVk	Unambiguous	40S ribosomal protein S1 [Schizosaccharomyces pombe 972h-]	2	2	19114028;19113740	K8(Label:13C(6)15N(2))	HCD	1	0	1	1	4364			4.65801e+07	Heavy	Not Unique	Used	9.01629e+06	44489671	4.93437	1.00911	0.0130867
RALVHDGLARGIREASK	Unambiguous	40S ribosomal protein S12 [Schizosaccharomyces pombe 972h-]	2	1	19111998		HCD	1	0	1	1	2892			3.08172e+07	Light	Unique	Used	3.08172e+07	152072206	4.93466	1.00913	0.0131155
VNPTAVAk	Unambiguous	40S ribosomal protein S26 [Schizosaccharomyces pombe 972h-]	1	1	19114834	K8(Label:13C(6)15N(2))	HCD	1	0	1	1	250			163677431	Heavy	Unique	Used	31985723	158001820	4.93976	1.00949	0.0136201
LGSFSSVYHk	Unambiguous	40S ribosomal protein S7 [Schizosaccharomyces pombe 972h-]	1	1	19114589	K10(Label:13C(6)15N(2))	HCD	1	0	1	1	1164			4.56283e+07	Heavy	Unique	Used	9.23531e+06	4.56283e+07	4.94064	1.00955	0.0137066
LRnHRREERWADAHYk	Unambiguous	40S ribosomal protein S23 [Schizosaccharomyces pombe 972h-]	1	1	19112979	N3(Deamidated); K16(Label:13C(6)15N(2))	HCD	1	0	1	1	2755			1.09287e+08	Heavy	Unique	Used	21616545	106858206	4.94335	1.00973	0.0139748
GDIPGVRFk	Unambiguous	40S ribosomal protein S23 [Schizosaccharomyces pombe 972h-]	1	1	19112979	K9(Label:13C(6)15N(2))	HCD	1	0	1	1	6348			1.80803e+08	Heavy	Unique	Used	3.65206e+07	180596397	4.94505	1.00985	0.0141427
RAGELTTEELERIVTIIQNPSQFk	Unambiguous	40S ribosomal protein S18 [Schizosaccharomyces pombe 972h-]	1	1	19113298	K24(Label:13C(6)15N(2))	HCD	1	0	1	1	7325			2.65041e+08	Heavy	Unique	Used	5.25844e+07	260348432	4.95106	1.01027	0.0147342
HGRPGIGATHSSRFIPLk	Unambiguous	40S ribosomal protein S15 [Schizosaccharomyces pombe 972h-]	2	1	19075461	K18(Label:13C(6)15N(2))	HCD	1	0	1	1	2923			2611546518	Heavy	Unique	Used	526377620	2606443840	4.95166	1.01031	0.0147936
DISLVDYITIGnGQPLPHTAGRFQTk	Unambiguous	40S ribosomal protein S5 [Schizosaccharomyces pombe 972h-]	2	1	19115124	N12(Deamidated); K26(Label:13C(6)15N(2))	HCD	0.1515	0	1	1	4760			1.86041e+08	Heavy	Unique	Used	3.73627e+07	1.85086e+08	4.95376	1.01045	0.0150002
FRLILIESRIHRLARYYRk	Unambiguous	40S ribosomal protein S13 [Schizosaccharomyces pombe 972h-]	1	1	19114812	K19(Label:13C(6)15N(2))	HCD	1	0	1	1	5678			487039853	Heavy	Unique	Used	9.73662e+07	482463216	4.95514	1.01055	0.0151359
IAGYTTHLMK	Unambiguous	40S ribosomal protein S17 [Schizosaccharomyces pombe 972h-]	2	2	19075512;19112037		HCD	1	0	1	1	1036			51525227	Light	Not Unique	Used	51525227	255366798	4.95615	1.01062	0.0152351
SSPFGGSSHAk	Unambiguous	40S ribosomal protein S23 [Schizosaccharomyces pombe 972h-]	1	1	19112979	K11(Label:13C(6)15N(2))	HCD	1	0	1	1	208			5.62312e+08	Heavy	Unique	Used	113166611	561110286	4.95827	1.01076	0.015443
TDASAVQAFGLRTHYGGGRTTGFALIYDDVEAMk	Unambiguous	40S ribosomal protein S24 [Schizosaccharomyces pombe 972h-]	1	1	19115165	K34(Label:13C(6)15N(2))	HCD	1	0	1	1	4839			6.94695e+08	Heavy	Unique	Used	138723598	688716849	4.96467	1.0112	0.016071
SLPDIVVVLDPk	Unambiguous	40S ribosomal protein S3 [Schizosaccharomyces pombe 972h-]	1	1	19113555	K12(Label:13C(6)15N(2))	HCD	1	0	1	1	7182			3.04993e+07	Heavy	Unique	Used	6142990	3.04993e+07	4.96489	1.01122	0.0160929
HIDFALSSpYGGGRpGRCk	Unambiguous	40S ribosomal protein S9 [Schizosaccharomyces pombe 972h-]	2	2	19112632;19113857	P9(Oxidation); P15(Dioxidation); K19(Label:13C(6)15N(2))	HCD	1	0	1	1	6550			3.96434e+06	Heavy	Not Unique	Used	762220	3.78441e+06	4.96498	1.01122	0.0161015
SSPFGGSSHAK	Unambiguous	40S ribosomal protein S23 [Schizosaccharomyces pombe 972h-]	1	1	19112979		HCD	1	0	1	1	5934			1.67654e+07	Light	Unique	Used	1.67654e+07	8.32454e+07	4.96531	1.01125	0.0161342
MHRTIIIRREYLHFIPk	Unambiguous	40S ribosomal protein S11 [Schizosaccharomyces pombe 972h-]	1	1	19115584	K17(Label:13C(6)15N(2))	HCD	1	0	1	1	2547			1.04415e+08	Heavy	Unique	Used	2.0788e+07	1.03244e+08	4.96654	1.01133	0.016254
VLAVDLLNPSHESEmRk	Unambiguous	40S ribosomal protein S27 [Schizosaccharomyces pombe 972h-]	1	1	19112006	M15(Oxidation); K17(Label:13C(6)15N(2))	HCD	1	0	1	1	1775			2.88082e+07	Heavy	Unique	Used	5.7981e+06	2.88082e+07	4.96855	1.01147	0.0164512
TVRFNVLRVVk	Unambiguous	40S ribosomal protein S11 [Schizosaccharomyces pombe 972h-]	1	1	19115584	K11(Label:13C(6)15N(2))	HCD	1	0	1	1	1623			69266931	Heavy	Unique	Used	1.3651e+07	67838491	4.9695	1.01153	0.0165434
DQYVPEVSELEk	Unambiguous	40S ribosomal protein S17 [Schizosaccharomyces pombe 972h-]	1	1	19075512	K12(Label:13C(6)15N(2))	HCD	1	0	1	1	4374			7.29532e+08	Heavy	Unique	Used	1.45718e+08	724698208	4.9733	1.01179	0.0169153
FEPHYRLVRVGQAEPIQK	Unambiguous	40S ribosomal protein S24 [Schizosaccharomyces pombe 972h-]	1	1	19112688		HCD	1	0	1	1	2496			1.29711e+08	Light	Unique	Used	1.29711e+08	645491312	4.97637	1.012	0.0172152
VMFAMTQIk	Unambiguous	40S ribosomal protein S18 [Schizosaccharomyces pombe 972h-]	1	1	19113298	K9(Label:13C(6)15N(2))	HCD	1	0	1	1	4384			926789511	Heavy	Unique	Used	1.86138e+08	926789511	4.97905	1.01219	0.0174768
AIHQALFQQGVLVAk	Unambiguous	40S ribosomal protein S10 [Schizosaccharomyces pombe 972h-]	1	1	19112397	K15(Label:13C(6)15N(2))	HCD	1	0	1	1	6689			1.34454e+08	Heavy	Unique	Used	2.69989e+07	1.34454e+08	4.98	1.01225	0.0175692
ELAPYDPDWYYVRAAAIARHIYLRk	Unambiguous	40S ribosomal protein S19 [Schizosaccharomyces pombe 972h-]	2	2	19113385;19112013	K25(Label:13C(6)15N(2))	HCD	1	0	1	1	7946			166358915	Heavy	Not Unique	Used	3.33279e+07	1.6602e+08	4.98142	1.01235	0.0177078
GmSPSQIGVTLRDSHGIPQVRFITGQk	Unambiguous	40S ribosomal protein S13 [Schizosaccharomyces pombe 972h-]	1	1	19114812	M2(Oxidation); K27(Label:13C(6)15N(2))	HCD	0.3363	0	1	1	2596			2.20484e+08	Heavy	Unique	Used	4.41907e+07	2.20137e+08	4.98152	1.01236	0.0177174
SFqLLANNVDSk	Unambiguous	40S ribosomal protein S18 [Schizosaccharomyces pombe 972h-]	1	1	19113298	Q3(Deamidated); K12(Label:13C(6)15N(2))	HCD	1	0	1	1	4304			99908214	Heavy	Unique	Used	20045502	99908214	4.98407	1.01253	0.0179659
GMSPSQIGVTLRDSHGIPQVRFITGQk	Unambiguous	40S ribosomal protein S13 [Schizosaccharomyces pombe 972h-]	1	1	19114812	K27(Label:13C(6)15N(2))	HCD	1	0	1	1	2612			7.12152e+07	Heavy	Unique	Used	1.42609e+07	7.10908e+07	4.98503	1.0126	0.0180591
RPRSRTLTAVHNAILEDIVFPTEIIGK	Unambiguous	40S ribosomal protein S7 [Schizosaccharomyces pombe 972h-]	1	1	19114589		HCD	1	0	1	1	7029			6.85625e+06	Light	Unique	Used	6.85625e+06	34181569	4.98546	1.01263	0.0181014
RVAAPHHWLLDk	Unambiguous	40S ribosomal protein S4 [Schizosaccharomyces pombe 972h-]	3	2	19112469;19113142	K12(Label:13C(6)15N(2))	HCD	1	0	1	1	921			2.64838e+08	Heavy	Not Unique	Used	5.30117e+07	264507298	4.9896	1.01291	0.0185034
HPEVGVPNLQVIk	Unambiguous	40S ribosomal protein S10 [Schizosaccharomyces pombe 972h-]	2	2	19114930;19112397	K13(Label:13C(6)15N(2))	HCD	1	0	1	1	4063			9.66353e+09	Heavy	Not Unique	Used	1936165943	9660896235	4.9897	1.01292	0.0185138
RASRVVIEK	Unambiguous	40S ribosomal protein S17 [Schizosaccharomyces pombe 972h-]	2	2	19075512;19112037		HCD	1	0	1	1	365			6.90314e+07	Light	Not Unique	Used	6.90314e+07	344691790	4.99326	1.01316	0.0188593
TLGNFVK	Unambiguous	40S ribosomal protein S2 [Schizosaccharomyces pombe 972h-]	1	1	19075935		HCD	1	0	1	1	1195			75108050	Light	Unique	Used	75108050	375382042	4.99789	1.01347	0.0193084
HPEVGVPnLQVIk	Unambiguous	40S ribosomal protein S10 [Schizosaccharomyces pombe 972h-]	2	2	19114930;19112397	N8(Deamidated); K13(Label:13C(6)15N(2))	HCD	0.0857	0	1	1	1844			1.43584e+07	Heavy	Not Unique	Used	2.79406e+06	13969615	4.99976	1.0136	0.0194893
GRFTVHRITAEEAk	Unambiguous	40S ribosomal protein S4 [Schizosaccharomyces pombe 972h-]	3	2	19112469;19113142	K14(Label:13C(6)15N(2))	HCD	1	0	1	1	6000			1.10709e+07	Heavy	Not Unique	Used	2.19106e+06	1.09699e+07	5.00667	1.01407	0.0201573
FmTNRLLQRk	Unambiguous	40S ribosomal protein S24 [Schizosaccharomyces pombe 972h-]	2	2	19112688;19115165	M2(Oxidation); K10(Label:13C(6)15N(2))	HCD	1	0	1	1	7607			2.03274e+08	Heavy	Not Unique	Used	4.05869e+07	2.03274e+08	5.00837	1.01419	0.0203217
ELAPYDPDWYYVRAAAIARHIYLRk	Unambiguous	40S ribosomal protein S19 [Schizosaccharomyces pombe 972h-]	2	2	19113385;19112013	K25(Label:13C(6)15N(2))	HCD	1	0	1	1	5817			4.99577e+07	Heavy	Not Unique	Used	9.91364e+06	4.96615e+07	5.00941	1.01426	0.0204226
GmSPSQIGVTLRDSHGIPQVRFITGQk	Unambiguous	40S ribosomal protein S13 [Schizosaccharomyces pombe 972h-]	1	1	19114812	M2(Oxidation); K27(Label:13C(6)15N(2))	HCD	0.3413	0	1	1	4294			1570711888	Heavy	Unique	Used	312130465	1563827820	5.01017	1.01431	0.0204959
YGLNISRQSFREYANDIGFVk	Unambiguous	40S ribosomal protein S29 [Schizosaccharomyces pombe 972h-]	1	1	19112005	K21(Label:13C(6)15N(2))	HCD	1	0	1	1	6976			1.69358e+07	Heavy	Unique	Used	2.11467e+06	1.0596e+07	5.01072	1.01435	0.0205485
AIHQALFSQGVLVAK	Unambiguous	40S ribosomal protein S10 [Schizosaccharomyces pombe 972h-]	1	1	19114930		HCD	1	0	1	1	6715			23087189	Light	Unique	Used	23087189	1.1579e+08	5.01532	1.01466	0.0209925
ADADSVVEqILk	Unambiguous	40S ribosomal protein S13 [Schizosaccharomyces pombe 972h-]	1	1	19114812	Q9(Deamidated); K12(Label:13C(6)15N(2))	HCD	1	0	1	1	2176			1.19388e+06	Heavy	Unique	Used	237735	1.19388e+06	5.02189	1.0151	0.0216243
RWTIRNmVETAAIRDLSEASVYSEYTIPk	Unambiguous	40S ribosomal protein S26 [Schizosaccharomyces pombe 972h-]	1	1	19114834	M7(Oxidation); K29(Label:13C(6)15N(2))	HCD	1	0	1	1	7923			7.48879e+07	Heavy	Unique	Used	1.49105e+07	7.48879e+07	5.02251	1.01514	0.021684
VmFAmTQIk	Unambiguous	40S ribosomal protein S18 [Schizosaccharomyces pombe 972h-]	1	1	19113298	M2(Oxidation); M5(Oxidation); K9(Label:13C(6)15N(2))	HCD	1	0	1	1	3427			81263706	Heavy	Unique	Used	1.49641e+07	75245330	5.0284	1.01554	0.0222494
TRYNWGWFYYTLTNEGVEYLREYLHLPAEVVPATHk	Unambiguous	40S ribosomal protein S10 [Schizosaccharomyces pombe 972h-]	2	2	19114930;19112397	K36(Label:13C(6)15N(2))	HCD	1	0	1	1	7464			6.15322e+08	Heavy	Not Unique	Used	117589289	591387646	5.02926	1.0156	0.0223325
QMVVDILHPGK	Unambiguous	40S ribosomal protein S24 [Schizosaccharomyces pombe 972h-]	2	2	19112688;19115165		HCD	1	0	1	1	6688			3.21963e+07	Light	Not Unique	Used	3.21963e+07	1.61942e+08	5.02984	1.01564	0.0223875
IAGYTTHLMk	Unambiguous	40S ribosomal protein S17 [Schizosaccharomyces pombe 972h-]	2	2	19075512;19112037	K10(Label:13C(6)15N(2))	HCD	1	0	1	1	992			3571027646	Heavy	Not Unique	Used	7.09872e+08	3571027646	5.03052	1.01568	0.0224529
GRFTVHRITAEEAk	Unambiguous	40S ribosomal protein S4 [Schizosaccharomyces pombe 972h-]	3	2	19112469;19113142	K14(Label:13C(6)15N(2))	HCD	1	0	1	1	2854			3.73841e+08	Heavy	Not Unique	Used	71024462	357388904	5.03191	1.01578	0.0225864
GmSPSQIGVTLRDSHGIPQVRFITGQk	Unambiguous	40S ribosomal protein S13 [Schizosaccharomyces pombe 972h-]	1	1	19114812	M2(Oxidation); K27(Label:13C(6)15N(2))	HCD	0.3898	0	1	1	6799			232403328	Heavy	Unique	Used	4.49527e+07	226253466	5.03315	1.01586	0.0227046
VNPTAVAk	Unambiguous	40S ribosomal protein S26 [Schizosaccharomyces pombe 972h-]	1	1	19114834	K8(Label:13C(6)15N(2))	HCD	1	0	1	1	5958		1	2.59071e+06	Heavy	Unique	Used	386470	1946896	5.03764	1.01616	0.0231343
TDASAVQAFGLRTHYGGGRTTGFALIYDDVEAMk	Unambiguous	40S ribosomal protein S24 [Schizosaccharomyces pombe 972h-]	1	1	19115165	K34(Label:13C(6)15N(2))	HCD	1	0	1	1	4845			1.37788e+08	Heavy	Unique	Used	2.72348e+07	1.37299e+08	5.04132	1.01641	0.0234863
ATNNIYPLQNVFVRk	Unambiguous	40S ribosomal protein S1 [Schizosaccharomyces pombe 972h-]	1	1	19113740	K15(Label:13C(6)15N(2))	HCD	1	0	1	1	4451			7.01244e+07	Heavy	Unique	Used	1.39048e+07	7.01244e+07	5.04319	1.01654	0.0236653
RLLGTAYK	Unambiguous	40S ribosomal protein S23 [Schizosaccharomyces pombe 972h-]	1	1	19112979		HCD	1	0	1	1	661			205047258	Light	Unique	Used	205047258	1034351332	5.04445	1.01662	0.0237854
TWETYEMRIHk	Unambiguous	40S ribosomal protein S20 [Schizosaccharomyces pombe 972h-]	1	1	19075936	K11(Label:13C(6)15N(2))	HCD	1	0	1	1	3605			1.53001e+08	Heavy	Unique	Used	30146218	152090327	5.04509	1.01667	0.023846
MTTPQWIDIVK	Unambiguous	40S ribosomal protein S19 [Schizosaccharomyces pombe 972h-]	2	2	19113385;19112013		HCD	1	0	1	1	4730			1.60066e+08	Light	Not Unique	Used	1.60066e+08	807588636	5.04536	1.01668	0.0238716
RALVHDGLARGIREASk	Unambiguous	40S ribosomal protein S12 [Schizosaccharomyces pombe 972h-]	2	1	19111998	K17(Label:13C(6)15N(2))	HCD	1	0	1	1	2884			1108427415	Heavy	Unique	Used	2.19556e+08	1108427415	5.04849	1.01689	0.0241699
LSImPIRRGYWGTALGDPHTVPVk	Unambiguous	40S ribosomal protein S2 [Schizosaccharomyces pombe 972h-]	1	1	19075935	M4(Oxidation); K24(Label:13C(6)15N(2))	HCD	0.1667	0	1	1	4211			1.08487e+08	Heavy	Unique	Used	19695267	99447369	5.0493	1.01695	0.0242478
RLIDLHSPSEIVk	Unambiguous	40S ribosomal protein S20 [Schizosaccharomyces pombe 972h-]	1	1	19075936	K13(Label:13C(6)15N(2))	HCD	1	0	1	1	1595			2.27485e+08	Heavy	Unique	Used	44716762	225841324	5.05048	1.01703	0.0243604
AIVAYYQk	Unambiguous	40S ribosomal protein S16 [Schizosaccharomyces pombe 972h-]	1	1	19112530	K8(Label:13C(6)15N(2))	HCD	1	0	1	1	1047			6.58576e+08	Heavy	Unique	Used	1.30378e+08	6.58576e+08	5.05129	1.01708	0.0244374
QLEDGRTLSDYNIQk	Unambiguous	ubiquitin-40S ribosomal protein S31 fusion protein [Schizosaccharomyces pombe 972h-]	4	1	19114970	K15(Label:13C(6)15N(2))	HCD	1	0	1	1	3596			1.01672e+08	Heavy	Unique	Used	2.00177e+07	1.01206e+08	5.05584	1.01739	0.0248694
TDASAVQAFGLRTHYGGGRTTGFALIYDDVEAMk	Unambiguous	40S ribosomal protein S24 [Schizosaccharomyces pombe 972h-]	1	1	19115165	K34(Label:13C(6)15N(2))	HCD	1	0	1	1	7517			1.26506e+06	Heavy	Unique	Used	213255	1.07829e+06	5.05631	1.01742	0.0249146
VGALPPTWk	Unambiguous	40S ribosomal protein S13 [Schizosaccharomyces pombe 972h-]	1	1	19114812	K9(Label:13C(6)15N(2))	HCD	1	0	1	1	4289		1	4.51753e+07	Heavy	Unique	Used	5.84458e+06	29553280	5.05653	1.01743	0.0249354
SIHHARVLIFQRHIRVGk	Unambiguous	40S ribosomal protein S9 [Schizosaccharomyces pombe 972h-]	2	2	19112632;19113857	K18(Label:13C(6)15N(2))	HCD	1	0	1	1	5366			4.27653e+08	Heavy	Not Unique	Used	8.43244e+07	426426297	5.05697	1.01746	0.0249776
FRLILIESRIHRLARYYRk	Unambiguous	40S ribosomal protein S13 [Schizosaccharomyces pombe 972h-]	1	1	19114812	K19(Label:13C(6)15N(2))	HCD	1	0	1	1	7819			2.7263e+08	Heavy	Unique	Used	5.33317e+07	269795386	5.05882	1.01759	0.025153
LQEEERERk	Unambiguous	40S ribosomal protein S17 [Schizosaccharomyces pombe 972h-]	2	2	19075512;19112037	K9(Label:13C(6)15N(2))	HCD	1	0	1	1	22			4.80198e+08	Heavy	Not Unique	Used	94914476	4.80198e+08	5.05927	1.01762	0.0251956
RLLGTAYK	Unambiguous	40S ribosomal protein S23 [Schizosaccharomyces pombe 972h-]	1	1	19112979		HCD	1	0	1	1	3024			6.7821e+07	Light	Unique	Used	6.7821e+07	343464928	5.06429	1.01795	0.0256719
AIVAYYQk	Unambiguous	40S ribosomal protein S16 [Schizosaccharomyces pombe 972h-]	1	1	19112530	K8(Label:13C(6)15N(2))	HCD	1	0	1	1	3409			1.86609e+08	Heavy	Unique	Used	3.6614e+07	185724953	5.07251	1.0185	0.0264504
ADADSVVEQILk	Unambiguous	40S ribosomal protein S13 [Schizosaccharomyces pombe 972h-]	1	1	19114812	K12(Label:13C(6)15N(2))	HCD	1	0	1	1	2154			8.62331e+06	Heavy	Unique	Used	1.69819e+06	8.62331e+06	5.07794	1.01886	0.0269626
SAIVQIDAApFRVWYETHYGILMGSk	Unambiguous	40S ribosomal protein S8 [Schizosaccharomyces pombe 972h-]	2	1	19115431	P10(Dioxidation); K26(Label:13C(6)15N(2))	HCD	1	0	1	1	7194			2.70477e+07	Heavy	Unique	Used	3.98353e+06	20260603	5.08609	1.01941	0.0277309
DQYVPEVSELEk	Unambiguous	40S ribosomal protein S17 [Schizosaccharomyces pombe 972h-]	1	1	19075512	K12(Label:13C(6)15N(2))	HCD	1	0	1	1	1953			2.54427e+07	Heavy	Unique	Used	4.3319e+06	22039079	5.08763	1.01951	0.0278757
TLGNFVk	Unambiguous	40S ribosomal protein S2 [Schizosaccharomyces pombe 972h-]	1	1	19075935	K7(Label:13C(6)15N(2))	HCD	1	0	1	1	6505			1.18603e+06	Heavy	Unique	Used	233043	1.18603e+06	5.08931	1.01962	0.0280337
NREEAAEFAQLmAk	Unambiguous	40S ribosomal protein S6 [Schizosaccharomyces pombe 972h-]	2	1	19113745	M12(Oxidation); K14(Label:13C(6)15N(2))	HCD	1	0	1	1	3492			1.22691e+08	Heavy	Unique	Used	2.35305e+07	119777270	5.09029	1.01969	0.0281263
RWTIRNMVETAAIRDLSEASVYSEYTIPk	Unambiguous	40S ribosomal protein S26 [Schizosaccharomyces pombe 972h-]	1	1	19114834	K29(Label:13C(6)15N(2))	HCD	1	0	1	1	7967			6.41016e+07	Heavy	Unique	Used	1.24583e+07	63431641	5.09153	1.01977	0.0282424
RIVDEVAIIASk	Unambiguous	40S ribosomal protein S17 [Schizosaccharomyces pombe 972h-]	2	2	19075512;19112037	K12(Label:13C(6)15N(2))	HCD	1	0	1	1	1938			8.72078e+07	Heavy	Not Unique	Used	1.66902e+07	85051783	5.09592	1.02006	0.0286545
LLELHGESQDVGTK	Unambiguous	40S ribosomal protein S1 [Schizosaccharomyces pombe 972h-]	1	1	19114028		HCD	1	0	1	1	3265			3.07945e+07	Light	Unique	Used	3.07945e+07	157028976	5.09926	1.02028	0.0289677
IAGYTTHLMk	Unambiguous	40S ribosomal protein S17 [Schizosaccharomyces pombe 972h-]	2	2	19075512;19112037	K10(Label:13C(6)15N(2))	HCD	1	0	1	1	995			2608602393	Heavy	Not Unique	Used	5.11407e+08	2608602393	5.10083	1.02039	0.0291153
IAGYTTHLMk	Unambiguous	40S ribosomal protein S17 [Schizosaccharomyces pombe 972h-]	2	2	19075512;19112037	K10(Label:13C(6)15N(2))	HCD	1	0	1	1	3236			3977584067	Heavy	Not Unique	Used	7.79356e+08	3977584067	5.10368	1.02057	0.0293821
RLIDLHSPSEIVk	Unambiguous	40S ribosomal protein S20 [Schizosaccharomyces pombe 972h-]	1	1	19075936	K13(Label:13C(6)15N(2))	HCD	1	0	1	1	3862		1	12141879	Heavy	Unique	Used	2.37827e+06	12141879	5.10534	1.02068	0.0295371
VLAVDLLNPSHESEmRk	Unambiguous	40S ribosomal protein S27 [Schizosaccharomyces pombe 972h-]	1	1	19112006	M15(Oxidation); K17(Label:13C(6)15N(2))	HCD	1	0	1	1	4016			6.94798e+07	Heavy	Unique	Used	1.26808e+07	64750095	5.10616	1.02074	0.0296142
FEPHYRLVRVGHAEPIQk	Unambiguous	40S ribosomal protein S24 [Schizosaccharomyces pombe 972h-]	1	1	19115165	K18(Label:13C(6)15N(2))	HCD	1	0	1	1	2431			2.62564e+08	Heavy	Unique	Used	5.11089e+07	2.60985e+08	5.10644	1.02076	0.0296406
QpNSAIRk	Unambiguous	40S ribosomal protein S23 [Schizosaccharomyces pombe 972h-]	1	1	19112979	P2(Dioxidation); K8(Label:13C(6)15N(2))	HCD	1	0	1	1	2642			4.29885e+07	Heavy	Unique	Used	8.01982e+06	40954719	5.10669	1.02077	0.0296631
VGALPpTWk	Unambiguous	40S ribosomal protein S13 [Schizosaccharomyces pombe 972h-]	1	1	19114812	P6(Dioxidation); K9(Label:13C(6)15N(2))	HCD	1	0	1	1	1349			2.39375e+07	Heavy	Unique	Used	4.51838e+06	23074687	5.10685	1.02078	0.0296781
TIRLWDLEk	Unambiguous	40S ribosomal protein cpc2/RACK1 [Schizosaccharomyces pombe 972h-]	1	1	19114682	K9(Label:13C(6)15N(2))	HCD	1	0	1	1	6819			5.71107e+06	Heavy	Unique	Used	1.05787e+06	5407160	5.11137	1.02108	0.0301004
RPRSRTLTAVHNAILEDIVFPTEIIGk	Unambiguous	40S ribosomal protein S7 [Schizosaccharomyces pombe 972h-]	1	1	19114589	K27(Label:13C(6)15N(2))	HCD	1	0	1	1	4726			167494824	Heavy	Unique	Used	3.22101e+07	164680356	5.1127	1.02117	0.0302247
QPHIFQnAk	Unambiguous	40S ribosomal protein S11 [Schizosaccharomyces pombe 972h-]	1	1	19115584	N7(Deamidated); K9(Label:13C(6)15N(2))	HCD	1	0	1	1	595			2.04957e+07	Heavy	Unique	Used	3.83981e+06	19642055	5.11537	1.02135	0.0304738
FVDEHSk	Unambiguous	40S ribosomal protein S16 [Schizosaccharomyces pombe 972h-]	1	1	19112530	K7(Label:13C(6)15N(2))	HCD	1	0	1	1	163			1.66995e+08	Heavy	Unique	Used	3.26447e+07	1.66995e+08	5.11552	1.02136	0.0304882
GDIPGVRFk	Unambiguous	40S ribosomal protein S23 [Schizosaccharomyces pombe 972h-]	1	1	19112979	K9(Label:13C(6)15N(2))	HCD	1	0	1	1	1301			366639108	Heavy	Unique	Used	70937344	363031040	5.11763	1.0215	0.0306843
IPSWFLnRQk	Unambiguous	40S ribosomal protein S18 [Schizosaccharomyces pombe 972h-]	1	1	19113298	N7(Deamidated); K10(Label:13C(6)15N(2))	HCD	0.2778	0	1	1	6813			8.77023e+06	Heavy	Unique	Used	1.50327e+06	7.70186e+06	5.1234	1.02188	0.031221
THLRNmIILPEMVGSVVGIYNGk	Unambiguous	40S ribosomal protein S15 [Schizosaccharomyces pombe 972h-]	2	1	19075461	M6(Oxidation); K23(Label:13C(6)15N(2))	HCD	1	0	1	1	7110			6.64611e+07	Heavy	Unique	Used	1.10625e+07	56684607	5.12402	1.02192	0.0312788
LNLETNk	Unambiguous	40S ribosomal protein S4 [Schizosaccharomyces pombe 972h-]	3	2	19112469;19113142	K7(Label:13C(6)15N(2))	HCD	1	0	1	1	2925			40922957	Heavy	Not Unique	Used	7.6361e+06	39130487	5.12441	1.02194	0.031315
QmVVDILHPGk	Unambiguous	40S ribosomal protein S24 [Schizosaccharomyces pombe 972h-]	2	2	19112688;19115165	M2(Oxidation); K11(Label:13C(6)15N(2))	HCD	1	0	1	1	1443			3581232598	Heavy	Not Unique	Used	6.98806e+08	3581232598	5.12479	1.02197	0.0313505
QpNSAIRk	Unambiguous	40S ribosomal protein S23 [Schizosaccharomyces pombe 972h-]	1	1	19112979	P2(Dioxidation); K8(Label:13C(6)15N(2))	HCD	1	0	1	1	5866			6.68835e+06	Heavy	Unique	Used	1.25762e+06	6446699	5.12609	1.02205	0.0314718
TRIIQVAYHPSnNELVRTNTLTk	Unambiguous	40S ribosomal protein S8 [Schizosaccharomyces pombe 972h-]	2	1	19115431	N12(Deamidated); K23(Label:13C(6)15N(2))	HCD	0.1923	0	1	1	3937			5.22472e+07	Heavy	Unique	Used	9730965	49897799	5.12773	1.02216	0.0316241
MHRTIIIRREYLHFIPk	Unambiguous	40S ribosomal protein S11 [Schizosaccharomyces pombe 972h-]	1	1	19115584	K17(Label:13C(6)15N(2))	HCD	1	0	1	1	7753			2.20823e+07	Heavy	Unique	Used	4.3051e+06	2.20823e+07	5.12933	1.02227	0.0317722
GkPAGLNAARk	Unambiguous	40S ribosomal protein S23 [Schizosaccharomyces pombe 972h-]	1	1	19112979	K2(Label:13C(6)15N(2)); K11(Label:13C(6)15N(2))	HCD	1	0	1	1	141			3.79289e+08	Heavy	Unique	Used	7.32457e+07	376033492	5.13386	1.02257	0.0321926
YYPRLTLDFQTNk	Unambiguous	40S ribosomal protein S17 [Schizosaccharomyces pombe 972h-]	2	2	19075512;19112037	K13(Label:13C(6)15N(2))	HCD	1	0	1	1	2033			4.22595e+07	Heavy	Not Unique	Used	8.18927e+06	4.20577e+07	5.13571	1.02269	0.0323635
TTYAQSSQIRAIHQk	Unambiguous	40S ribosomal protein S1 [Schizosaccharomyces pombe 972h-]	1	1	19113740	K15(Label:13C(6)15N(2))	HCD	1	0	1	1	310			43215862	Heavy	Unique	Used	8.14916e+06	4.18583e+07	5.13652	1.02274	0.0324382
NREEAAEFAQLmAk	Unambiguous	40S ribosomal protein S6 [Schizosaccharomyces pombe 972h-]	2	1	19113745	M12(Oxidation); K14(Label:13C(6)15N(2))	HCD	1	0	1	1	3598		1	2.33254e+07	Heavy	Unique	Used	2.35843e+06	12129105	5.14288	1.02316	0.0330269
AIVAYYQk	Unambiguous	40S ribosomal protein S16 [Schizosaccharomyces pombe 972h-]	1	1	19112530	K8(Label:13C(6)15N(2))	HCD	1	0	1	1	1154			1.84569e+08	Heavy	Unique	Used	3.56474e+07	183355225	5.14358	1.0232	0.0330918
LNISYPAnGTQk	Unambiguous	40S ribosomal protein S6 [Schizosaccharomyces pombe 972h-]	2	1	19113745	N8(Deamidated); K12(Label:13C(6)15N(2))	HCD	0.2262	0	1	1	1429		1	5.1055e+06	Heavy	Unique	Used	665224	3421911	5.144	1.02323	0.0331305
HGYIDEFTEIDDHRSGk	Unambiguous	40S ribosomal protein S22 [Schizosaccharomyces pombe 972h-]	1	1	19114146	K17(Label:13C(6)15N(2))	HCD	1	0	1	1	1678			9.3995e+06	Heavy	Unique	Used	1.71266e+06	8.81963e+06	5.14966	1.0236	0.0336527
TGEHFRLVYDIk	Unambiguous	40S ribosomal protein S4 [Schizosaccharomyces pombe 972h-]	3	2	19112469;19113142	K12(Label:13C(6)15N(2))	HCD	1	0	1	1	6618			2.53567e+06	Heavy	Not Unique	Used	406129	2.09163e+06	5.15017	1.02363	0.0336993
THLRNmIILPEmVGSVVGIYnGk	Unambiguous	40S ribosomal protein S15 [Schizosaccharomyces pombe 972h-]	2	1	19075461	M6(Oxidation); M12(Oxidation); N21(Deamidated); K23(Label:13C(6)15N(2))	HCD	0.2083	0	1	1	6911			1.64485e+07	Heavy	Unique	Used	2.66978e+06	1.37564e+07	5.15262	1.02379	0.0339251
TWETYEMRIHk	Unambiguous	40S ribosomal protein S20 [Schizosaccharomyces pombe 972h-]	1	1	19075936	K11(Label:13C(6)15N(2))	HCD	1	0	1	1	3611			4.24791e+07	Heavy	Unique	Used	8.04331e+06	41474917	5.15645	1.02404	0.0342778
RALVHDGLARGIREASk	Unambiguous	40S ribosomal protein S12 [Schizosaccharomyces pombe 972h-]	2	1	19111998	K17(Label:13C(6)15N(2))	HCD	1	0	1	1	2883			1.70885e+09	Heavy	Unique	Used	330573819	1705893880	5.1604	1.0243	0.0346411
VnGAPLSLVQPEILRmk	Unambiguous	40S ribosomal protein S16 [Schizosaccharomyces pombe 972h-]	1	1	19112530	N2(Deamidated); M16(Oxidation); K17(Label:13C(6)15N(2))	HCD	0.6176	0	1	1	2075			1.77394e+07	Heavy	Unique	Used	3.35643e+06	1.73215e+07	5.16069	1.02432	0.0346673
LAGEYGLRNk	Unambiguous	40S ribosomal protein S9 [Schizosaccharomyces pombe 972h-]	2	2	19112632;19113857	K10(Label:13C(6)15N(2))	HCD	1	0	1	1	492			756350963	Heavy	Not Unique	Used	1.46401e+08	756350963	5.1663	1.02469	0.0351824
GmSPSQIGVTLRDSHGIPQVRFITGQk	Unambiguous	40S ribosomal protein S13 [Schizosaccharomyces pombe 972h-]	1	1	19114812	M2(Oxidation); K27(Label:13C(6)15N(2))	HCD	0.3789	0	1	1	1987			3.22253e+07	Heavy	Unique	Used	6.13792e+06	3.17273e+07	5.16906	1.02487	0.0354358
kDDGAAPGGFAPSFRGGFGRPVAA	Unambiguous	40S ribosomal protein S10 [Schizosaccharomyces pombe 972h-]	1	1	19112397	K1(Label:13C(6)15N(2))	HCD	1	0	1	1	4105			7.93485e+07	Heavy	Unique	Used	1.52633e+07	7.8995e+07	5.17548	1.02528	0.0360232
LRNHRREERWADAHYk	Unambiguous	40S ribosomal protein S23 [Schizosaccharomyces pombe 972h-]	1	1	19112979	K16(Label:13C(6)15N(2))	HCD	1	0	1	1	188			3.32001e+08	Heavy	Unique	Used	6.31836e+07	3.27029e+08	5.17585	1.02531	0.0360571
VNGAPLSLVQPEILRmk	Unambiguous	40S ribosomal protein S16 [Schizosaccharomyces pombe 972h-]	1	1	19112530	M16(Oxidation); K17(Label:13C(6)15N(2))	HCD	1	0	1	1	2048			1.27229e+07	Heavy	Unique	Used	2.43866e+06	1.26271e+07	5.17787	1.02544	0.0362413
RLFEGNAIIRRLVRLGILDETRMk	Unambiguous	40S ribosomal protein S9 [Schizosaccharomyces pombe 972h-]	1	1	19113857	K24(Label:13C(6)15N(2))	HCD	1	0	1	1	5793			2.92744e+07	Heavy	Unique	Used	5.32592e+06	2.75792e+07	5.1783	1.02547	0.0362807
TWETYEmRIHk	Unambiguous	40S ribosomal protein S20 [Schizosaccharomyces pombe 972h-]	1	1	19075936	M7(Oxidation); K11(Label:13C(6)15N(2))	HCD	1	0	1	1	3332			61003397	Heavy	Unique	Used	1.1536e+07	59753408	5.17975	1.02556	0.0364134
LAGEYGLRNk	Unambiguous	40S ribosomal protein S9 [Schizosaccharomyces pombe 972h-]	2	2	19112632;19113857	K10(Label:13C(6)15N(2))	HCD	1	0	1	1	3018		1	1.44057e+07	Heavy	Not Unique	Used	2.04767e+06	10608252	5.18065	1.02562	0.0364955
RLFEGNAIIRRLVRLGILDESRmk	Unambiguous	40S ribosomal protein S9 [Schizosaccharomyces pombe 972h-]	1	1	19112632	M23(Oxidation); K24(Label:13C(6)15N(2))	HCD	1	0	1	1	2622			3.0455e+06	Heavy	Unique	Used	549272	2.85074e+06	5.19003	1.02623	0.0373498
THLRNmIILPEmVGSVVGIYNGK	Unambiguous	40S ribosomal protein S15 [Schizosaccharomyces pombe 972h-]	2	1	19075461	M6(Oxidation); M12(Oxidation)	HCD	0.3571	0	1	1	6881			7.03294e+06	Light	Unique	Used	5190925	26995967	5.20061	1.02691	0.0383108
IRRAARELLTLDEk	Unambiguous	40S ribosomal protein S9 [Schizosaccharomyces pombe 972h-]	2	2	19112632;19113857	K14(Label:13C(6)15N(2))	HCD	1	0	1	1	5417			2.79397e+09	Heavy	Not Unique	Used	535442734	2788073118	5.20704	1.02733	0.0388937
TIRLWDLEk	Unambiguous	40S ribosomal protein cpc2/RACK1 [Schizosaccharomyces pombe 972h-]	1	1	19114682	K9(Label:13C(6)15N(2))	HCD	1	0	1	1	4334			34397225	Heavy	Unique	Used	5920593	30834228	5.20796	1.02739	0.038977
GMSPSQIGVTLRDSHGIPQVRFITGQk	Unambiguous	40S ribosomal protein S13 [Schizosaccharomyces pombe 972h-]	1	1	19114812	K27(Label:13C(6)15N(2))	HCD	1	0	1	1	2614			4.74673e+07	Heavy	Unique	Used	9.09985e+06	4.73974e+07	5.20859	1.02743	0.039034
FITAYAAFLk	Unambiguous	40S ribosomal protein S19 [Schizosaccharomyces pombe 972h-]	1	1	19113385	K10(Label:13C(6)15N(2))	HCD	1	0	1	1	7518			45240554	Heavy	Unique	Used	8.68493e+06	45240554	5.20908	1.02746	0.0390784
HPEVGVPNLQVIK	Unambiguous	40S ribosomal protein S10 [Schizosaccharomyces pombe 972h-]	2	2	19114930;19112397		HCD	1	0	1	1	1924			1.04527e+07	Light	Not Unique	Used	1.04527e+07	54472930	5.21139	1.02761	0.039287
LRNHRREERWADAHYk	Unambiguous	40S ribosomal protein S23 [Schizosaccharomyces pombe 972h-]	1	1	19112979	K16(Label:13C(6)15N(2))	HCD	1	0	1	1	2299			689819505	Heavy	Unique	Used	1.32229e+08	689819505	5.21687	1.02796	0.0397816
INVDQDTk	Unambiguous	40S ribosomal protein S17 [Schizosaccharomyces pombe 972h-]	1	1	19075512	K8(Label:13C(6)15N(2))	HCD	1	0	1	1	2996			6.92225e+07	Heavy	Unique	Used	1.3254e+07	6.92225e+07	5.22278	1.02834	0.0403143
SFQLLAnNVDSk	Unambiguous	40S ribosomal protein S18 [Schizosaccharomyces pombe 972h-]	1	1	19113298	N7(Deamidated); K12(Label:13C(6)15N(2))	HCD	0.1974	0	1	1	1972			3.0165e+07	Heavy	Unique	Used	5.66799e+06	2.9611e+07	5.22425	1.02843	0.0404467
RIQRGPVRGISFk	Unambiguous	40S ribosomal protein S17 [Schizosaccharomyces pombe 972h-]	2	2	19075512;19112037	K13(Label:13C(6)15N(2))	HCD	1	0	1	1	488			2.53684e+09	Heavy	Not Unique	Used	4.84569e+08	2532817575	5.22695	1.02861	0.0406893
AIHQALFQQGVLVAK	Unambiguous	40S ribosomal protein S10 [Schizosaccharomyces pombe 972h-]	1	1	19112397		HCD	1	0	1	1	4354			1.83636e+06	Light	Unique	Used	1.83636e+06	9.60413e+06	5.22997	1.0288	0.0409611
kDDGAAPGGFAPSFRGGFGRPVAA	Unambiguous	40S ribosomal protein S10 [Schizosaccharomyces pombe 972h-]	1	1	19112397	K1(Label:13C(6)15N(2))	HCD	1	0	1	1	6717			3.0561e+07	Heavy	Unique	Used	5.65685e+06	2.96248e+07	5.23698	1.02925	0.0415895
EYQIVDYFLPRLnDEVmk	Unambiguous	40S ribosomal protein S2 [Schizosaccharomyces pombe 972h-]	1	1	19075935	N13(Deamidated); M17(Oxidation); K18(Label:13C(6)15N(2))	HCD	1	0	1	1	5072			1.96804e+07	Heavy	Unique	Used	3.75579e+06	1.96804e+07	5.24002	1.02944	0.0418618
VARQQRk	Unambiguous	40S ribosomal protein S24 [Schizosaccharomyces pombe 972h-]	2	2	19112688;19115165	K7(Label:13C(6)15N(2))	HCD	1	0	1	1	6			2.66157e+07	Heavy	Not Unique	Used	5.07764e+06	2.66157e+07	5.24175	1.02955	0.0420171
ADADSVVEQILk	Unambiguous	40S ribosomal protein S13 [Schizosaccharomyces pombe 972h-]	1	1	19114812	K12(Label:13C(6)15N(2))	HCD	1	0	1	1	2047		1	2.50211e+06	Heavy	Unique	Used	310942	1.63015e+06	5.2426	1.02961	0.0420935
TLGNFVK	Unambiguous	40S ribosomal protein S2 [Schizosaccharomyces pombe 972h-]	1	1	19075935		HCD	1	0	1	1	1148			1.91124e+08	Light	Unique	Used	1.91124e+08	1.00208e+09	5.24307	1.02964	0.0421348
DQYVPEVSELEVDRVNVDQDTk	Unambiguous	40S ribosomal protein S17 [Schizosaccharomyces pombe 972h-]	1	1	19112037	K22(Label:13C(6)15N(2))	HCD	1	0	1	1	6865			1.30799e+08	Heavy	Unique	Used	2.46343e+07	1.29179e+08	5.24386	1.02969	0.0422055
ImLPEPk	Unambiguous	40S ribosomal protein S3 [Schizosaccharomyces pombe 972h-]	1	1	19113555	M2(Oxidation); K7(Label:13C(6)15N(2))	HCD	1	0	1	1	3400			1.9819e+08	Heavy	Unique	Used	3.7564e+07	197068151	5.2462	1.02984	0.042415
TPAEAIYGEYVDK	Unambiguous	40S ribosomal protein S11 [Schizosaccharomyces pombe 972h-]	1	1	19115584		HCD	1	0	1	1	4562			1.49394e+07	Light	Unique	Used	1.49394e+07	78431692	5.24999	1.03008	0.0427539
ImLPEPk	Unambiguous	40S ribosomal protein S3 [Schizosaccharomyces pombe 972h-]	1	1	19113555	M2(Oxidation); K7(Label:13C(6)15N(2))	HCD	1	0	1	1	3545		1	11576412	Heavy	Unique	Used	1.61432e+06	8482688	5.25465	1.03037	0.0431692
VmFAMTQIK	Unambiguous	40S ribosomal protein S18 [Schizosaccharomyces pombe 972h-]	1	1	19113298	M2(Oxidation)	HCD	1	0	1	1	4154			1.41146e+07	Light	Unique	Used	1.41146e+07	74168118	5.2547	1.03038	0.0431739
VmFAmTQIk	Unambiguous	40S ribosomal protein S18 [Schizosaccharomyces pombe 972h-]	1	1	19113298	M2(Oxidation); M5(Oxidation); K9(Label:13C(6)15N(2))	HCD	1	0	1	1	1181			8.08707e+07	Heavy	Unique	Used	1.52155e+07	80008214	5.25832	1.03061	0.0434961
RALVHDGLARGIREASk	Unambiguous	40S ribosomal protein S12 [Schizosaccharomyces pombe 972h-]	2	1	19111998	K17(Label:13C(6)15N(2))	HCD	1	0	1	1	526			1.81992e+08	Heavy	Unique	Used	3.42093e+07	179916994	5.25931	1.03067	0.0435838
QmVVDILHPGK	Unambiguous	40S ribosomal protein S24 [Schizosaccharomyces pombe 972h-]	2	2	19112688;19115165	M2(Oxidation)	HCD	1	0	1	1	3589			1.07426e+08	Light	Not Unique	Used	89734188	472111264	5.26122	1.03079	0.0437541
AFVVIGDSDGHVGLGIk	Unambiguous	40S ribosomal protein S2 [Schizosaccharomyces pombe 972h-]	1	1	19075935	K17(Label:13C(6)15N(2))	HCD	1	0	1	1	5140			5.74713e+06	Heavy	Unique	Used	1.05399e+06	5548690	5.26447	1.031	0.044043
GIASSALPYVRSppAWCk	Unambiguous	40S ribosomal protein S13 [Schizosaccharomyces pombe 972h-]	1	1	19114812	P13(Dioxidation); P14(Oxidation); K18(Label:13C(6)15N(2))	HCD	0.0392	0	1	1	4528			6.88541e+07	Heavy	Unique	Used	1.17181e+07	61699796	5.26536	1.03106	0.0441223
RLIDLHSPSEIVk	Unambiguous	40S ribosomal protein S20 [Schizosaccharomyces pombe 972h-]	1	1	19075936	K13(Label:13C(6)15N(2))	HCD	1	0	1	1	1605			2.43058e+07	Heavy	Unique	Used	4.49294e+06	2.36635e+07	5.26683	1.03115	0.0442529
LSIMPIRRGYWGTALGDPHTVPVk	Unambiguous	40S ribosomal protein S2 [Schizosaccharomyces pombe 972h-]	1	1	19075935	K24(Label:13C(6)15N(2))	HCD	1	0	1	1	5715			6.12763e+07	Heavy	Unique	Used	9688806	51044989	5.26845	1.03125	0.0443964
kDEGAAPSGFAPSFRGGFGRPQ	Unambiguous	40S ribosomal protein S10 [Schizosaccharomyces pombe 972h-]	1	1	19114930	K1(Label:13C(6)15N(2))	HCD	1	0	1	1	1652			5.40611e+06	Heavy	Unique	Used	1.02589e+06	5.40611e+06	5.26966	1.03133	0.0445038
SSPFGGSSHAK	Unambiguous	40S ribosomal protein S23 [Schizosaccharomyces pombe 972h-]	1	1	19112979		HCD	1	0	1	1	2983			1.12923e+07	Light	Unique	Used	1.12923e+07	59526348	5.27143	1.03144	0.044661
RIQRGPVRGISFk	Unambiguous	40S ribosomal protein S17 [Schizosaccharomyces pombe 972h-]	2	2	19075512;19112037	K13(Label:13C(6)15N(2))	HCD	1	0	1	1	504			4.72848e+09	Heavy	Not Unique	Used	895874406	4724836796	5.27399	1.0316	0.044888
VNGAPLSLVQPEILRmk	Unambiguous	40S ribosomal protein S16 [Schizosaccharomyces pombe 972h-]	1	1	19112530	M16(Oxidation); K17(Label:13C(6)15N(2))	HCD	0.6556	0	1	1	4467			1.60101e+08	Heavy	Unique	Used	3.03456e+07	1.60101e+08	5.27593	1.03173	0.0450592
LDYVLALRIEDFLERRLQTQVFk	Unambiguous	40S ribosomal protein S9 [Schizosaccharomyces pombe 972h-]	2	2	19112632;19113857	K23(Label:13C(6)15N(2))	HCD	1	0	1	1	8027			6.70347e+07	Heavy	Not Unique	Used	1.26961e+07	6.70347e+07	5.27995	1.03198	0.045415
VPRRPFESARLDAELk	Unambiguous	40S ribosomal protein S9 [Schizosaccharomyces pombe 972h-]	2	2	19112632;19113857	K16(Label:13C(6)15N(2))	HCD	1	0	1	1	5495			1.42582e+08	Heavy	Not Unique	Used	2.54542e+07	134612126	5.2884	1.03251	0.0461611
VTAFVpHDGCLNFVDENDEVLLSGFGRk	Unambiguous	40S ribosomal protein S23 [Schizosaccharomyces pombe 972h-]	1	1	19112979	P6(Dioxidation); K28(Label:13C(6)15N(2))	HCD	1	0	1	1	7221			5.95805e+07	Heavy	Unique	Used	5.84614e+06	30922008	5.2893	1.03257	0.0462405
YYPRLTLDFQTNk	Unambiguous	40S ribosomal protein S17 [Schizosaccharomyces pombe 972h-]	2	2	19075512;19112037	K13(Label:13C(6)15N(2))	HCD	1	0	1	1	2029			1.98289e+08	Heavy	Not Unique	Used	3.6933e+07	195549365	5.29471	1.03291	0.0467167
DISLVDYITIGNGQPLPHTAGRFQTK	Unambiguous	40S ribosomal protein S5 [Schizosaccharomyces pombe 972h-]	2	1	19115124		HCD	1	0	1	1	7026			2.75671e+06	Light	Unique	Used	2.75671e+06	1.46036e+07	5.29749	1.03309	0.0469616
FMTnRLLQRk	Unambiguous	40S ribosomal protein S24 [Schizosaccharomyces pombe 972h-]	2	2	19112688;19115165	N4(Deamidated); K10(Label:13C(6)15N(2))	HCD	1	0	1	1	2440			50578374	Heavy	Not Unique	Used	9.54356e+06	50578374	5.29974	1.03323	0.0471593
ATNNIYPLQNVFVRk	Unambiguous	40S ribosomal protein S1 [Schizosaccharomyces pombe 972h-]	1	1	19113740	K15(Label:13C(6)15N(2))	HCD	1	0	1	1	6880			3.2792e+07	Heavy	Unique	Used	5.81749e+06	3.0903e+07	5.31208	1.034	0.0482417
ImLPEPk	Unambiguous	40S ribosomal protein S3 [Schizosaccharomyces pombe 972h-]	1	1	19113555	M2(Oxidation); K7(Label:13C(6)15N(2))	HCD	1	0	1	1	1219		1	4218518	Heavy	Unique	Used	793476	4218518	5.31651	1.03428	0.0486284
THLRNmIILPEmVGSVVGIYnGk	Unambiguous	40S ribosomal protein S15 [Schizosaccharomyces pombe 972h-]	2	1	19075461	M6(Oxidation); M12(Oxidation); N21(Deamidated); K23(Label:13C(6)15N(2))	HCD	0.3455	0	1	1	4484			1.77721e+08	Heavy	Unique	Used	3.28011e+07	1.7446e+08	5.31871	1.03442	0.0488208
LRnHRREERWADAHYk	Unambiguous	40S ribosomal protein S23 [Schizosaccharomyces pombe 972h-]	1	1	19112979	N3(Deamidated); K16(Label:13C(6)15N(2))	HCD	1	0	1	1	2736			6.23683e+07	Heavy	Unique	Used	1.04257e+07	55501328	5.3235	1.03472	0.0492392
HIDFALSSpYGGGRpGRCk	Unambiguous	40S ribosomal protein S9 [Schizosaccharomyces pombe 972h-]	2	2	19112632;19113857	P9(Dioxidation); P15(Oxidation); K19(Label:13C(6)15N(2))	HCD	0.1892	0	1	1	1598			1.24611e+07	Heavy	Not Unique	Used	2.16306e+06	11522685	5.32704	1.03494	0.0495476
kDDGAAPGGFAPSFRGGFGRPVAA	Unambiguous	40S ribosomal protein S10 [Schizosaccharomyces pombe 972h-]	1	1	19112397	K1(Label:13C(6)15N(2))	HCD	1	0	1	1	4103			7.56059e+07	Heavy	Unique	Used	1.36919e+07	72973466	5.32969	1.03511	0.0497786
THLRNmIILPEmVGSVVGIYNGk	Unambiguous	40S ribosomal protein S15 [Schizosaccharomyces pombe 972h-]	2	1	19075461	M6(Oxidation); M12(Oxidation); K23(Label:13C(6)15N(2))	HCD	0.25	0	1	1	4463			70787276	Heavy	Unique	Used	1.32808e+07	70787276	5.33006	1.03513	0.04981
SSPFGGSSHAk	Unambiguous	40S ribosomal protein S23 [Schizosaccharomyces pombe 972h-]	1	1	19112979	K11(Label:13C(6)15N(2))	HCD	1	0	1	1	5935			6.30259e+07	Heavy	Unique	Used	1.17968e+07	6.29559e+07	5.3367	1.03554	0.0503878
TIRLWDLEk	Unambiguous	40S ribosomal protein cpc2/RACK1 [Schizosaccharomyces pombe 972h-]	1	1	19114682	K9(Label:13C(6)15N(2))	HCD	1	0	1	1	2013		1	2.04827e+06	Heavy	Unique	Used	201927	1.07821e+06	5.33962	1.03572	0.0506406
VAGVGLSALFHEK	Unambiguous	40S ribosomal protein S23 [Schizosaccharomyces pombe 972h-]	1	1	19112979		HCD	1	0	1	1	4587			3.01419e+07	Light	Unique	Used	3.01419e+07	160958016	5.34001	1.03575	0.0506753
TDASAVQAFGLRTHYGGGRTTGFALIYDDVEAmk	Unambiguous	40S ribosomal protein S24 [Schizosaccharomyces pombe 972h-]	1	1	19115165	M33(Oxidation); K34(Label:13C(6)15N(2))	HCD	1	0	1	1	7537			2.77408e+06	Heavy	Unique	Used	482593	2.57805e+06	5.34208	1.03588	0.0508547
FAGVDIRVRVSGGGHVSQIYAIRQAISk	Unambiguous	40S ribosomal protein S16 [Schizosaccharomyces pombe 972h-]	1	1	19112530	K28(Label:13C(6)15N(2))	HCD	1	0	1	1	6782			2.7918e+07	Heavy	Unique	Used	5.11969e+06	27378456	5.34768	1.03623	0.0513397
RTRQATDGRk	Unambiguous	40S ribosomal protein S7 [Schizosaccharomyces pombe 972h-]	1	1	19114589	K10(Label:13C(6)15N(2))	HCD	1	0	1	1	3			3.56433e+08	Heavy	Unique	Used	6.65967e+07	3.56433e+08	5.35212	1.0365	0.0517232
FRALRLDSGNFSWGSEGVSk	Unambiguous	40S ribosomal protein S8 [Schizosaccharomyces pombe 972h-]	2	1	19115431	K20(Label:13C(6)15N(2))	HCD	1	0	1	1	2018			3.35355e+06	Heavy	Unique	Used	569162	3.04623e+06	5.35214	1.0365	0.0517249
LLELHGESQDVGSk	Unambiguous	40S ribosomal protein S1 [Schizosaccharomyces pombe 972h-]	1	1	19113740	K14(Label:13C(6)15N(2))	HCD	1	0	1	1	3224			70933833	Heavy	Unique	Used	1.32453e+07	70933833	5.35542	1.03671	0.0520081
kVELAVLk	Unambiguous	ubiquitin-40S ribosomal protein S31 fusion protein [Schizosaccharomyces pombe 972h-]	2	1	19114970	K1(Label:13C(6)15N(2)); K8(Label:13C(6)15N(2))	HCD	1	0	1	1	1104			42279185	Heavy	Unique	Used	7890439	42279185	5.35828	1.03688	0.0522553
ADADSVVEQILk	Unambiguous	40S ribosomal protein S13 [Schizosaccharomyces pombe 972h-]	1	1	19114812	K12(Label:13C(6)15N(2))	HCD	1	0	1	1	7305			5.97074e+07	Heavy	Unique	Used	9.67959e+06	51873808	5.35909	1.03693	0.0523252
MHRTIIIRREYLHFIPk	Unambiguous	40S ribosomal protein S11 [Schizosaccharomyces pombe 972h-]	1	1	19115584	K17(Label:13C(6)15N(2))	HCD	1	0	1	1	5586			438116924	Heavy	Unique	Used	8.17404e+07	438116924	5.35986	1.03698	0.0523912
LSImPIRRGYWGTALGDPHTVPVk	Unambiguous	40S ribosomal protein S2 [Schizosaccharomyces pombe 972h-]	1	1	19075935	M4(Oxidation); K24(Label:13C(6)15N(2))	HCD	1	0	1	1	6730			1.83431e+07	Heavy	Unique	Used	3.25175e+06	1.74478e+07	5.36566	1.03734	0.0528907
RALVHDGLARGIREASk	Unambiguous	40S ribosomal protein S12 [Schizosaccharomyces pombe 972h-]	2	1	19111998	K17(Label:13C(6)15N(2))	HCD	1	0	1	1	536			8.16531e+08	Heavy	Unique	Used	1.5216e+08	8.16531e+08	5.36625	1.03738	0.0529417
FmTNRLLQRK	Unambiguous	40S ribosomal protein S24 [Schizosaccharomyces pombe 972h-]	2	2	19112688;19115165	M2(Oxidation)	HCD	1	0	1	1	694		1	1.04899e+06	Light	Not Unique	Used	1.04899e+06	5629262	5.36639	1.03739	0.0529535
kDEGAAPSGFAPSFRGGFGRPQ	Unambiguous	40S ribosomal protein S10 [Schizosaccharomyces pombe 972h-]	1	1	19114930	K1(Label:13C(6)15N(2))	HCD	1	0	1	1	3890		1	1.25238e+08	Heavy	Unique	Used	8346712	44796200	5.36693	1.03742	0.0530001
WQTTIEADQTIk	Unambiguous	40S ribosomal protein S1 [Schizosaccharomyces pombe 972h-]	1	1	19114028	K12(Label:13C(6)15N(2))	HCD	1	0	1	1	4129		1	1.01365e+07	Heavy	Unique	Used	802159	4.30559e+06	5.3675	1.03746	0.0530492
TRIIQVAYHPSNnELVRTNTLTk	Unambiguous	40S ribosomal protein S8 [Schizosaccharomyces pombe 972h-]	2	1	19115431	N13(Deamidated); K23(Label:13C(6)15N(2))	HCD	0.1333	0	1	1	3888			89470252	Heavy	Unique	Used	13149132	70671240	5.37459	1.03789	0.0536588
EWVPVTK	Unambiguous	40S ribosomal protein S2 [Schizosaccharomyces pombe 972h-]	1	1	19075935		HCD	1	0	1	1	6422		1	55753.2	Light	Unique	Used	55753.2	299812	5.3775	1.03807	0.0539077
TLGNFVk	Unambiguous	40S ribosomal protein S2 [Schizosaccharomyces pombe 972h-]	1	1	19075935	K7(Label:13C(6)15N(2))	HCD	1	0	1	1	6326			2.91643e+07	Heavy	Unique	Used	5.41742e+06	2.91643e+07	5.38342	1.03844	0.0544152
AQVGRPNILNATDEDIk	Unambiguous	40S ribosomal protein S0A [Schizosaccharomyces pombe 972h-]	1	1	19112932	K17(Label:13C(6)15N(2))	HCD	1	0	1	1	1634			1.81802e+07	Heavy	Unique	Used	3.0578e+06	1.64797e+07	5.38939	1.03881	0.0549257
GMSPSQIGVTLRDSHGIPQVRFITGQk	Unambiguous	40S ribosomal protein S13 [Schizosaccharomyces pombe 972h-]	1	1	19114812	K27(Label:13C(6)15N(2))	HCD	1	0	1	1	2054			8.9846e+06	Heavy	Unique	Used	1.64434e+06	8.86885e+06	5.39358	1.03906	0.055283
FMTnRLLQRk	Unambiguous	40S ribosomal protein S24 [Schizosaccharomyces pombe 972h-]	2	2	19112688;19115165	N4(Deamidated); K10(Label:13C(6)15N(2))	HCD	1	0	1	1	1260			7.31895e+07	Heavy	Not Unique	Used	1.26913e+07	68500600	5.39746	1.0393	0.0556143
FEPHYRLVRVGHAEPIQk	Unambiguous	40S ribosomal protein S24 [Schizosaccharomyces pombe 972h-]	1	1	19115165	K18(Label:13C(6)15N(2))	HCD	1	0	1	1	969			3.24006e+07	Heavy	Unique	Used	5.53641e+06	29905429	5.40159	1.03955	0.0559656
RAGELTTEELERIVTIIQNPSQFk	Unambiguous	40S ribosomal protein S18 [Schizosaccharomyces pombe 972h-]	1	1	19113298	K24(Label:13C(6)15N(2))	HCD	1	0	1	1	5063			123889048	Heavy	Unique	Used	2.26574e+07	1.22467e+08	5.40515	1.03977	0.0562683
ADADSVVEQILk	Unambiguous	40S ribosomal protein S13 [Schizosaccharomyces pombe 972h-]	1	1	19114812	K12(Label:13C(6)15N(2))	HCD	1	0	1	1	4898			7.09403e+07	Heavy	Unique	Used	1.29637e+07	7.00739e+07	5.40542	1.03979	0.056291
VYEPILVAGADk	Unambiguous	40S ribosomal protein S16 [Schizosaccharomyces pombe 972h-]	1	1	19112530	K12(Label:13C(6)15N(2))	HCD	1	0	1	1	4347			1.78584e+08	Heavy	Unique	Used	32966801	1.78584e+08	5.41708	1.0405	0.057281
NREEAAEFAQLmAk	Unambiguous	40S ribosomal protein S6 [Schizosaccharomyces pombe 972h-]	2	1	19113745	M12(Oxidation); K14(Label:13C(6)15N(2))	HCD	1	0	1	1	1383			1.33285e+08	Heavy	Unique	Used	2.43925e+07	1.32191e+08	5.41936	1.04064	0.0574735
VnGAPLSLVQPEILRmk	Unambiguous	40S ribosomal protein S16 [Schizosaccharomyces pombe 972h-]	1	1	19112530	N2(Deamidated); M16(Oxidation); K17(Label:13C(6)15N(2))	HCD	0.6082	0	1	1	6921			6.19228e+07	Heavy	Unique	Used	1.07065e+07	58034037	5.42045	1.04071	0.0575663
LLELHGESQDVGTk	Unambiguous	40S ribosomal protein S1 [Schizosaccharomyces pombe 972h-]	1	1	19114028	K14(Label:13C(6)15N(2))	HCD	1	0	1	1	6243			2773072	Heavy	Unique	Used	460441	2.4961e+06	5.4211	1.04075	0.057621
VFLDNRDAnTVDYk	Unambiguous	40S ribosomal protein S7 [Schizosaccharomyces pombe 972h-]	1	1	19114589	N9(Deamidated); K14(Label:13C(6)15N(2))	HCD	1	0	1	1	3740			2.51812e+07	Heavy	Unique	Used	4.51726e+06	24582896	5.44199	1.04202	0.0593823
AIVVFVPQPLLk	Unambiguous	40S ribosomal protein S7 [Schizosaccharomyces pombe 972h-]	1	1	19114589	K12(Label:13C(6)15N(2))	HCD	1	0	1	1	7520			2.82732e+07	Heavy	Unique	Used	5.03883e+06	2.74214e+07	5.44201	1.04202	0.0593833
ALITYDRTLLVADPRRMEPk	Unambiguous	40S ribosomal protein S16 [Schizosaccharomyces pombe 972h-]	1	1	19112530	K20(Label:13C(6)15N(2))	HCD	1	0	1	1	5694			2.54795e+08	Heavy	Unique	Used	4.64363e+07	252826842	5.44459	1.04218	0.0596008
FAGVDIRVRVSGGGHVSQIYAIRQAISk	Unambiguous	40S ribosomal protein S16 [Schizosaccharomyces pombe 972h-]	1	1	19112530	K28(Label:13C(6)15N(2))	HCD	1	0	1	1	4302			1.98927e+08	Heavy	Unique	Used	3.65195e+07	1.98927e+08	5.44714	1.04233	0.0598144
LREDLERLK	Unambiguous	40S ribosomal protein S18 [Schizosaccharomyces pombe 972h-]	1	1	19113298		HCD	1	0	1	1	723			1.5e+07	Light	Unique	Used	1.5e+07	81709333	5.44728	1.04234	0.0598263
LRNHRREERWADAHYk	Unambiguous	40S ribosomal protein S23 [Schizosaccharomyces pombe 972h-]	1	1	19112979	K16(Label:13C(6)15N(2))	HCD	1	0	1	1	189			121324109	Heavy	Unique	Used	2.18572e+07	119103406	5.44916	1.04245	0.0599841
FmTNRLLQRK	Unambiguous	40S ribosomal protein S24 [Schizosaccharomyces pombe 972h-]	2	2	19112688;19115165	M2(Oxidation)	HCD	1	0	1	1	3028		1	1.35566e+06	Light	Not Unique	Used	1.35566e+06	7388158	5.44987	1.0425	0.0600431
VGALPpTWk	Unambiguous	40S ribosomal protein S13 [Schizosaccharomyces pombe 972h-]	1	1	19114812	P6(Oxidation); K9(Label:13C(6)15N(2))	HCD	1	0	1	1	958			8.52902e+07	Heavy	Unique	Used	1.56481e+07	8.52902e+07	5.45053	1.04254	0.0600987
LRNHRREERWADAHYK	Unambiguous	40S ribosomal protein S23 [Schizosaccharomyces pombe 972h-]	1	1	19112979		HCD	1	0	1	1	2706			2.41721e+07	Light	Unique	Used	2.41721e+07	131977667	5.45991	1.0431	0.0608836
RRSDGIHIINLGk	Unambiguous	40S ribosomal protein S0B [Schizosaccharomyces pombe 972h-]	1	1	19115325	K13(Label:13C(6)15N(2))	HCD	1	0	1	1	3234		1	28601086	Heavy	Unique	Used	2.87229e+06	15696914	5.46494	1.04341	0.0613038
INVDQDTK	Unambiguous	40S ribosomal protein S17 [Schizosaccharomyces pombe 972h-]	1	1	19075512		HCD	1	0	1	1	6177			199292	Light	Unique	Used	199292	1.09101e+06	5.47446	1.04398	0.0620967
RQVRPAAPRAGRPEPRERSSAADAGYRRAEk	Unambiguous	40S ribosomal protein S10 [Schizosaccharomyces pombe 972h-]	1	1	19112397	K31(Label:13C(6)15N(2))	HCD	1	0	1	1	5308			7.40281e+07	Heavy	Unique	Used	1.35223e+07	7.40281e+07	5.47451	1.04399	0.0621011
FEPHYRLVRVGQAEPIQk	Unambiguous	40S ribosomal protein S24 [Schizosaccharomyces pombe 972h-]	1	1	19112688	K18(Label:13C(6)15N(2))	HCD	1	0	1	1	2498			5.55328e+07	Heavy	Unique	Used	1.01422e+07	5.55328e+07	5.4754	1.04404	0.0621753
IRRAARELLTLDEk	Unambiguous	40S ribosomal protein S9 [Schizosaccharomyces pombe 972h-]	2	2	19112632;19113857	K14(Label:13C(6)15N(2))	HCD	1	0	1	1	5434			7.47159e+06	Heavy	Not Unique	Used	1.13724e+06	6227279	5.47579	1.04406	0.0622073
TPAEAIYGEYVDk	Unambiguous	40S ribosomal protein S11 [Schizosaccharomyces pombe 972h-]	1	1	19115584	K13(Label:13C(6)15N(2))	HCD	1	0	1	1	1894			3.13047e+07	Heavy	Unique	Used	5.70713e+06	31264702	5.47819	1.04421	0.0624067
QpNSAIRk	Unambiguous	40S ribosomal protein S23 [Schizosaccharomyces pombe 972h-]	1	1	19112979	P2(Dioxidation); K8(Label:13C(6)15N(2))	HCD	1	0	1	1	9			197484895	Heavy	Unique	Used	3.59783e+07	197484895	5.489	1.04486	0.0633038
FRLILIESRIHRLARYYRk	Unambiguous	40S ribosomal protein S13 [Schizosaccharomyces pombe 972h-]	1	1	19114812	K19(Label:13C(6)15N(2))	HCD	1	0	1	1	2587			1.30325e+08	Heavy	Unique	Used	2.35254e+07	1.29163e+08	5.49035	1.04494	0.0634155
RALVHDGLARGIREASk	Unambiguous	40S ribosomal protein S12 [Schizosaccharomyces pombe 972h-]	2	1	19111998	K17(Label:13C(6)15N(2))	HCD	1	0	1	1	544			1.31057e+09	Heavy	Unique	Used	2.38601e+08	1.31057e+09	5.49272	1.04508	0.0636122
InVDQDTk	Unambiguous	40S ribosomal protein S17 [Schizosaccharomyces pombe 972h-]	1	1	19075512	N2(Deamidated); K8(Label:13C(6)15N(2))	HCD	0.5538	0	1	1	5985		1	592821	Heavy	Unique	Used	77691.4	426852	5.49421	1.04517	0.063735
LIPEVIGRAIEk	Unambiguous	40S ribosomal protein S1 [Schizosaccharomyces pombe 972h-]	1	1	19113740	K12(Label:13C(6)15N(2))	HCD	1	0	1	1	6766		1	5472900	Heavy	Unique	Used	538421	2968308	5.51299	1.04629	0.0652837
RAGELTTEELERIVTIIQNPSQFk	Unambiguous	40S ribosomal protein S18 [Schizosaccharomyces pombe 972h-]	1	1	19113298	K24(Label:13C(6)15N(2))	HCD	1	0	1	1	2198			1.38074e+06	Heavy	Unique	Used	240087	1.32566e+06	5.52158	1.0468	0.0659889
MTTPQWIDIVK	Unambiguous	40S ribosomal protein S19 [Schizosaccharomyces pombe 972h-]	2	2	19113385;19112013		HCD	1	0	1	1	5015			7.16852e+06	Light	Not Unique	Used	7.16852e+06	39639804	5.52971	1.04729	0.0666548
FAGVDIRVRVSGGGHVSQIYAIRQAISk	Unambiguous	40S ribosomal protein S16 [Schizosaccharomyces pombe 972h-]	1	1	19112530	K28(Label:13C(6)15N(2))	HCD	1	0	1	1	5220			3.0999e+06	Heavy	Unique	Used	524989	2.90336e+06	5.53034	1.04732	0.0667064
THLRNmIILPEmVGSVVGIYNGk	Unambiguous	40S ribosomal protein S15 [Schizosaccharomyces pombe 972h-]	2	1	19075461	M6(Oxidation); M12(Oxidation); K23(Label:13C(6)15N(2))	HCD	0.2295	0	1	1	6872			43625568	Heavy	Unique	Used	7.88609e+06	43625568	5.53197	1.04742	0.0668395
GDIPGVRFk	Unambiguous	40S ribosomal protein S23 [Schizosaccharomyces pombe 972h-]	1	1	19112979	K9(Label:13C(6)15N(2))	HCD	1	0	1	1	3533		1	4.94322e+08	Heavy	Unique	Used	57792352	319928832	5.53583	1.04765	0.0671553
THLRNMIILPEmVGSVVGIYNGk	Unambiguous	40S ribosomal protein S15 [Schizosaccharomyces pombe 972h-]	2	1	19075461	M12(Oxidation); K23(Label:13C(6)15N(2))	HCD	0.3077	0	1	1	4668			2.45725e+07	Heavy	Unique	Used	2.71576e+06	1.50884e+07	5.55585	1.04883	0.0687845
THLRNmIILPEMVGSVVGIYnGk	Unambiguous	40S ribosomal protein S15 [Schizosaccharomyces pombe 972h-]	2	1	19075461	M6(Oxidation); N21(Deamidated); K23(Label:13C(6)15N(2))	HCD	1	0	1	1	4880		1	1.30655e+07	Heavy	Unique	Used	530758	2.95433e+06	5.56624	1.04945	0.0696266
ALITYDRTLLVADPRRMEPk	Unambiguous	40S ribosomal protein S16 [Schizosaccharomyces pombe 972h-]	1	1	19112530	K20(Label:13C(6)15N(2))	HCD	1	0	1	1	2589			9.94227e+07	Heavy	Unique	Used	1.76938e+07	98584335	5.57168	1.04976	0.070066
kDDGAAPGGFAPSFRGGFGRPVAA	Unambiguous	40S ribosomal protein S10 [Schizosaccharomyces pombe 972h-]	1	1	19112397	K1(Label:13C(6)15N(2))	HCD	1	0	1	1	1852			11544108	Heavy	Unique	Used	2.0081e+06	1.12042e+07	5.57954	1.05023	0.0707
QIVNVPSFVVRLDTQK	Unambiguous	40S ribosomal protein S9 [Schizosaccharomyces pombe 972h-]	1	1	19113857		HCD	1	0	1	1	2110			2.08462e+06	Light	Unique	Used	2.08462e+06	11637338	5.58247	1.0504	0.0709362
TDASAVQAFGLRTHYGGGRTTGFALIYDDVEAmk	Unambiguous	40S ribosomal protein S24 [Schizosaccharomyces pombe 972h-]	1	1	19115165	M33(Oxidation); K34(Label:13C(6)15N(2))	HCD	1	0	1	1	7502			1.54436e+07	Heavy	Unique	Used	2.44096e+06	1.3637e+07	5.58672	1.05065	0.071278
TDASAVQAFGLRTHYGGGRTTGFALIYDDVEAmk	Unambiguous	40S ribosomal protein S24 [Schizosaccharomyces pombe 972h-]	1	1	19115165	M33(Oxidation); K34(Label:13C(6)15N(2))	HCD	1	0	1	1	4647			1.5077e+08	Heavy	Unique	Used	25278147	141699469	5.60561	1.05175	0.0727926
VNGAPLSLVQPEILRMk	Unambiguous	40S ribosomal protein S16 [Schizosaccharomyces pombe 972h-]	1	1	19112530	K17(Label:13C(6)15N(2))	HCD	1	0	1	1	2115			4.80137e+06	Heavy	Unique	Used	837348	4.69488e+06	5.60684	1.05182	0.0728908
YALnGREVk	Unambiguous	40S ribosomal protein S4 [Schizosaccharomyces pombe 972h-]	3	2	19112469;19113142	N4(Deamidated); K9(Label:13C(6)15N(2))	HCD	1	0	1	1	725			3.32264e+07	Heavy	Not Unique	Used	5.55031e+06	31287279	5.63703	1.05357	0.0752926
FRLILIESRIHRLARYYRk	Unambiguous	40S ribosomal protein S13 [Schizosaccharomyces pombe 972h-]	1	1	19114812	K19(Label:13C(6)15N(2))	HCD	1	0	1	1	7798			1.54751e+07	Heavy	Unique	Used	2.74433e+06	1.54751e+07	5.63894	1.05369	0.075444
LRnHRREERWADAHYk	Unambiguous	40S ribosomal protein S23 [Schizosaccharomyces pombe 972h-]	1	1	19112979	N3(Deamidated); K16(Label:13C(6)15N(2))	HCD	1	0	1	1	5324			2.0796e+08	Heavy	Unique	Used	3.65958e+07	206481744	5.64223	1.05388	0.075704
VTAFVpHDGCLNFVDENDEVLLSGFGRk	Unambiguous	40S ribosomal protein S23 [Schizosaccharomyces pombe 972h-]	1	1	19112979	P6(Dioxidation); K28(Label:13C(6)15N(2))	HCD	1	0	1	1	7215			4.93715e+07	Heavy	Unique	Used	8.42009e+06	4.7536e+07	5.64555	1.05407	0.0759663
TDASAVQAFGLRTHYGGGRTTGFALIYDDVEAMk	Unambiguous	40S ribosomal protein S24 [Schizosaccharomyces pombe 972h-]	1	1	19115165	K34(Label:13C(6)15N(2))	HCD	1	0	1	1	7531			832379	Heavy	Unique	Used	95561	539514	5.64576	1.05408	0.0759827
LNISYPAnGTQk	Unambiguous	40S ribosomal protein S6 [Schizosaccharomyces pombe 972h-]	2	1	19113745	N8(Deamidated); K12(Label:13C(6)15N(2))	HCD	0.3553	0	1	1	6386			1.96877e+07	Heavy	Unique	Used	3.00793e+06	16987475	5.64757	1.05418	0.0761258
HGRPGIGATHSSRFIPLk	Unambiguous	40S ribosomal protein S15 [Schizosaccharomyces pombe 972h-]	2	1	19075461	K18(Label:13C(6)15N(2))	HCD	1	0	1	1	630		1	337119820	Heavy	Unique	Used	22880334	129491712	5.65952	1.05487	0.0770674
AIHQALFSQGVLVAk	Unambiguous	40S ribosomal protein S10 [Schizosaccharomyces pombe 972h-]	1	1	19114930	K15(Label:13C(6)15N(2))	HCD	1	0	1	1	1947			6.28965e+06	Heavy	Unique	Used	1.06561e+06	6.03408e+06	5.66255	1.05505	0.0773055
ADADSVVEQILk	Unambiguous	40S ribosomal protein S13 [Schizosaccharomyces pombe 972h-]	1	1	19114812	K12(Label:13C(6)15N(2))	HCD	1	0	1	1	4740			8.07915e+07	Heavy	Unique	Used	1.40333e+07	79477155	5.66346	1.0551	0.0773768
NLLAADSHIGSK	Unambiguous	40S ribosomal protein S0B [Schizosaccharomyces pombe 972h-]	1	1	19115325		HCD	1	0	1	1	1037		1	1.52086e+06	Light	Unique	Used	1.52086e+06	8628474	5.6734	1.05567	0.0781571
IAGYTTHLMk	Unambiguous	40S ribosomal protein S17 [Schizosaccharomyces pombe 972h-]	2	2	19075512;19112037	K10(Label:13C(6)15N(2))	HCD	1	0	1	1	6233			1.90058e+08	Heavy	Not Unique	Used	3.34584e+07	1.89943e+08	5.677	1.05587	0.0784385
LLAGLAVRRAAYGVLRYVmEAGAk	Unambiguous	40S ribosomal protein S3 [Schizosaccharomyces pombe 972h-]	1	1	19113555	M19(Oxidation); K24(Label:13C(6)15N(2))	HCD	1	0	1	1	5822			2.71355e+08	Heavy	Unique	Used	4.77751e+07	2.71355e+08	5.67984	1.05604	0.0786611
mTTPQWIDIVk	Unambiguous	40S ribosomal protein S19 [Schizosaccharomyces pombe 972h-]	2	2	19113385;19112013	M1(Oxidation); K11(Label:13C(6)15N(2))	HCD	1	0	1	1	4790		1	1.56495e+07	Heavy	Not Unique	Used	1.4785e+06	8403594	5.68386	1.05627	0.0789752
GMSPSqIGVTLRDSHGIPQVRFITGQk	Unambiguous	40S ribosomal protein S13 [Schizosaccharomyces pombe 972h-]	1	1	19114812	Q6(Deamidated); K27(Label:13C(6)15N(2))	HCD	1	0	1	1	5753			1.49875e+07	Heavy	Unique	Used	1.32216e+06	7547553	5.70852	1.05767	0.0808933
QIVNVPSFVVRLDAQk	Unambiguous	40S ribosomal protein S9 [Schizosaccharomyces pombe 972h-]	1	1	19112632	K16(Label:13C(6)15N(2))	HCD	1	0	1	1	6985			6.68618e+07	Heavy	Unique	Used	1.14897e+07	65619460	5.71114	1.05782	0.0810963
IRRFFNLSk	Unambiguous	40S ribosomal protein S6 [Schizosaccharomyces pombe 972h-]	2	1	19113745	K9(Label:13C(6)15N(2))	HCD	1	0	1	1	1218			101494083	Heavy	Unique	Used	17519261	100069668	5.71198	1.05787	0.0811616
FMTNRLLQRK	Unambiguous	40S ribosomal protein S24 [Schizosaccharomyces pombe 972h-]	2	2	19112688;19115165		HCD	1	0	1	1	2400			1.95401e+08	Light	Not Unique	Used	1.95401e+08	1.11648e+09	5.71378	1.05797	0.0813012
TTYAQSSQIRAIHQk	Unambiguous	40S ribosomal protein S1 [Schizosaccharomyces pombe 972h-]	1	1	19113740	K15(Label:13C(6)15N(2))	HCD	1	0	1	1	313			6.61766e+07	Heavy	Unique	Used	9.45585e+06	54076378	5.71883	1.05826	0.0816915
WQSTIEANQTIk	Unambiguous	40S ribosomal protein S1 [Schizosaccharomyces pombe 972h-]	1	1	19113740	K12(Label:13C(6)15N(2))	HCD	1	0	1	1	6427			1.13089e+07	Heavy	Unique	Used	1.97711e+06	1.13089e+07	5.71993	1.05832	0.0817762
EVGITALHIk	Unambiguous	40S ribosomal protein S14 [Schizosaccharomyces pombe 972h-]	1	1	19115099	K10(Label:13C(6)15N(2))	HCD	1	0	1	1	1596			6.04056e+07	Heavy	Unique	Used	1.0554e+07	6.04056e+07	5.72349	1.05852	0.082051
LREDLERLK	Unambiguous	40S ribosomal protein S18 [Schizosaccharomyces pombe 972h-]	1	1	19113298		HCD	1	0	1	1	3135			6458690	Light	Unique	Used	6458690	36996086	5.72811	1.05878	0.0824077
FMTNRLLQRk	Unambiguous	40S ribosomal protein S24 [Schizosaccharomyces pombe 972h-]	2	2	19112688;19115165	K10(Label:13C(6)15N(2))	HCD	1	0	1	1	900			4.70587e+08	Heavy	Not Unique	Used	8.2035e+07	4.70317e+08	5.73313	1.05907	0.0827943
VPRRPFESARLDAELk	Unambiguous	40S ribosomal protein S9 [Schizosaccharomyces pombe 972h-]	2	2	19112632;19113857	K16(Label:13C(6)15N(2))	HCD	1	0	1	1	2488			6.24274e+08	Heavy	Not Unique	Used	1.0825e+08	620984330	5.73656	1.05926	0.0830582
TDASAVQAFGLRTHYGGGRTTGFALIYDDVEAMk	Unambiguous	40S ribosomal protein S24 [Schizosaccharomyces pombe 972h-]	1	1	19115165	K34(Label:13C(6)15N(2))	HCD	1	0	1	1	7508			1.18191e+07	Heavy	Unique	Used	1.33697e+06	7.67258e+06	5.73879	1.05939	0.0832292
VNPTAVAk	Unambiguous	40S ribosomal protein S26 [Schizosaccharomyces pombe 972h-]	1	1	19114834	K8(Label:13C(6)15N(2))	HCD	1	0	1	1	422			7.1163e+07	Heavy	Unique	Used	12143803	69741265	5.74295	1.05962	0.083549
THLRNmIILPEMVGSVVGIYnGk	Unambiguous	40S ribosomal protein S15 [Schizosaccharomyces pombe 972h-]	2	1	19075461	M6(Oxidation); N21(Deamidated); K23(Label:13C(6)15N(2))	HCD	0.5526	0	1	1	4777			8.72606e+07	Heavy	Unique	Used	1.43048e+07	82156175	5.74327	1.05964	0.0835732
RLFEGNAIIRRLVRLGILDESRMk	Unambiguous	40S ribosomal protein S9 [Schizosaccharomyces pombe 972h-]	1	1	19112632	K24(Label:13C(6)15N(2))	HCD	1	0	1	1	5792			3.30857e+07	Heavy	Unique	Used	5.36989e+06	30851535	5.74528	1.05975	0.0837278
VRTDSTFPTGFMDVISVEk	Unambiguous	40S ribosomal protein S4 [Schizosaccharomyces pombe 972h-]	2	2	19112469;19113142	K19(Label:13C(6)15N(2))	HCD	1	0	1	1	4828			28796434	Heavy	Not Unique	Used	4.99746e+06	28796434	5.76221	1.0607	0.0850229
NLLAADSHIGSk	Unambiguous	40S ribosomal protein S0B [Schizosaccharomyces pombe 972h-]	1	1	19115325	K12(Label:13C(6)15N(2))	HCD	1	0	1	1	3240			5.961e+07	Heavy	Unique	Used	9.76817e+06	56410680	5.77495	1.06142	0.0859926
SIEEIYLYSLPIk	Unambiguous	40S ribosomal protein S2 [Schizosaccharomyces pombe 972h-]	1	1	19075935	K13(Label:13C(6)15N(2))	HCD	1	0	1	1	4986			1.26788e+07	Heavy	Unique	Used	2.12356e+06	1.2276e+07	5.78087	1.06175	0.0864427
VYEPILVAGADk	Unambiguous	40S ribosomal protein S16 [Schizosaccharomyces pombe 972h-]	1	1	19112530	K12(Label:13C(6)15N(2))	HCD	1	0	1	1	1940			1.77026e+07	Heavy	Unique	Used	2.75254e+06	1.5921e+07	5.7841	1.06193	0.0866872
LRVEDIQGk	Unambiguous	40S ribosomal protein S1 [Schizosaccharomyces pombe 972h-]	2	2	19114028;19113740	K9(Label:13C(6)15N(2))	HCD	1	0	1	1	3147		1	8.28927e+06	Heavy	Not Unique	Used	1.05552e+06	6.1111e+06	5.78967	1.06224	0.0871093
VGALPpTWk	Unambiguous	40S ribosomal protein S13 [Schizosaccharomyces pombe 972h-]	1	1	19114812	P6(Oxidation); K9(Label:13C(6)15N(2))	HCD	1	0	1	1	3209			83255784	Heavy	Unique	Used	1.43632e+07	83255784	5.79646	1.06262	0.0876228
TDASAVqAFGLRTHYGGGRTTGFALIYDDVEAMk	Unambiguous	40S ribosomal protein S24 [Schizosaccharomyces pombe 972h-]	1	1	19115165	Q7(Deamidated); K34(Label:13C(6)15N(2))	HCD	1	0	1	1	8025			6.63355e+07	Heavy	Unique	Used	1.10632e+07	64349953	5.81659	1.06373	0.0891385
RQVRPAAPRAGRPEPRERSSAADAGYRRAEk	Unambiguous	40S ribosomal protein S10 [Schizosaccharomyces pombe 972h-]	1	1	19112397	K31(Label:13C(6)15N(2))	HCD	1	0	1	1	2295			7.91548e+07	Heavy	Unique	Used	1.35186e+07	7.86383e+07	5.81703	1.06376	0.0891716
ACQSLDSRGYLk	Unambiguous	40S ribosomal protein S10 [Schizosaccharomyces pombe 972h-]	2	2	19114930;19112397	K12(Label:13C(6)15N(2))	HCD	1	0	1	1	1263		1	16968794	Heavy	Not Unique	Used	2.91633e+06	16968794	5.81854	1.06384	0.0892852
VLAVDLLNPSHESEmRk	Unambiguous	40S ribosomal protein S27 [Schizosaccharomyces pombe 972h-]	1	1	19112006	M15(Oxidation); K17(Label:13C(6)15N(2))	HCD	1	0	1	1	4028			5.40539e+07	Heavy	Unique	Used	8.73712e+06	50941567	5.83048	1.0645	0.0901794
DEEHAFRk	Unambiguous	40S ribosomal protein S1 [Schizosaccharomyces pombe 972h-]	1	1	19114028	K8(Label:13C(6)15N(2))	HCD	1	0	1	1	386		1	6.21124e+06	Heavy	Unique	Used	778699	4.54364e+06	5.83491	1.06475	0.0905106
GMSPSQIGVTLRDSHGIPQVRFITGQk	Unambiguous	40S ribosomal protein S13 [Schizosaccharomyces pombe 972h-]	1	1	19114812	K27(Label:13C(6)15N(2))	HCD	1	0	1	1	6894			1.39755e+08	Heavy	Unique	Used	2.38987e+07	1.39755e+08	5.84782	1.06546	0.0914734
THLRNMIILPEMVGSVVGIYNGk	Unambiguous	40S ribosomal protein S15 [Schizosaccharomyces pombe 972h-]	2	1	19075461	K23(Label:13C(6)15N(2))	HCD	1	0	1	1	7971			39985897	Heavy	Unique	Used	6.83683e+06	39985897	5.8486	1.0655	0.0915313
TVRFNVLRVVk	Unambiguous	40S ribosomal protein S11 [Schizosaccharomyces pombe 972h-]	1	1	19115584	K11(Label:13C(6)15N(2))	HCD	1	0	1	1	3773			6.9661e+08	Heavy	Unique	Used	1.1851e+08	6.9661e+08	5.87809	1.06712	0.093716
FELGRQPSnTRIGPk	Unambiguous	40S ribosomal protein S8 [Schizosaccharomyces pombe 972h-]	2	1	19115431	N9(Deamidated); K15(Label:13C(6)15N(2))	HCD	1	0	1	1	1151			4.98843e+07	Heavy	Unique	Used	8.42904e+06	4.96685e+07	5.89255	1.0679	0.0947803
IMLPEPK	Unambiguous	40S ribosomal protein S3 [Schizosaccharomyces pombe 972h-]	1	1	19113555		HCD	1	0	1	1	3496			35778498	Light	Unique	Used	35778498	211622900	5.91481	1.06911	0.0964098
InVDQDTk	Unambiguous	40S ribosomal protein S17 [Schizosaccharomyces pombe 972h-]	1	1	19075512	N2(Deamidated); K8(Label:13C(6)15N(2))	HCD	1	0	1	1	303		1	2.31924e+07	Heavy	Unique	Used	2970580	17694712	5.95665	1.07136	0.0994457
ACQSLDSRGYLk	Unambiguous	40S ribosomal protein S10 [Schizosaccharomyces pombe 972h-]	2	2	19114930;19112397	K12(Label:13C(6)15N(2))	HCD	1	0	1	1	6221			723127	Heavy	Not Unique	Used	118185	704113	5.95772	1.07142	0.0995225
VNGAPLSLVQPEILRMk	Unambiguous	40S ribosomal protein S16 [Schizosaccharomyces pombe 972h-]	1	1	19112530	K17(Label:13C(6)15N(2))	HCD	1	0	1	1	4713		1	1.35798e+07	Heavy	Unique	Used	1.6476e+06	9830614	5.96664	1.0719	0.100165
IMLPEPk	Unambiguous	40S ribosomal protein S3 [Schizosaccharomyces pombe 972h-]	1	1	19113555	K7(Label:13C(6)15N(2))	HCD	1	0	1	1	1417			34762978	Heavy	Unique	Used	5.80536e+06	34762978	5.98808	1.07304	0.101702
HGRPGIGATHSSRFIPLk	Unambiguous	40S ribosomal protein S15 [Schizosaccharomyces pombe 972h-]	2	1	19075461	K18(Label:13C(6)15N(2))	HCD	1	0	1	1	619			1.10905e+09	Heavy	Unique	Used	138191904	829871296	6.00521	1.07395	0.102923
LRNHRREERWADAHYk	Unambiguous	40S ribosomal protein S23 [Schizosaccharomyces pombe 972h-]	1	1	19112979	K16(Label:13C(6)15N(2))	HCD	1	0	1	1	5912			3.83382e+06	Heavy	Unique	Used	596688	3.58922e+06	6.01523	1.07448	0.103635
RRSDGVHILNLGk	Unambiguous	40S ribosomal protein S0A [Schizosaccharomyces pombe 972h-]	1	1	19112932	K13(Label:13C(6)15N(2))	HCD	1	0	1	1	919			8.674e+07	Heavy	Unique	Used	1.41094e+07	8.49307e+07	6.01944	1.0747	0.103934
RIQRGPVRGISFk	Unambiguous	40S ribosomal protein S17 [Schizosaccharomyces pombe 972h-]	2	2	19075512;19112037	K13(Label:13C(6)15N(2))	HCD	1	0	1	1	491			1202870375	Heavy	Not Unique	Used	198019141	1194779878	6.03366	1.07545	0.104939
HPEVGVPNLQVIk	Unambiguous	40S ribosomal protein S10 [Schizosaccharomyces pombe 972h-]	2	2	19114930;19112397	K13(Label:13C(6)15N(2))	HCD	1	0	1	1	4155			2.38812e+08	Heavy	Not Unique	Used	3.87005e+07	234470178	6.05859	1.07676	0.106691
LQEEERERK	Unambiguous	40S ribosomal protein S17 [Schizosaccharomyces pombe 972h-]	2	2	19075512;19112037		HCD	1	0	1	1	58			3.9168e+06	Light	Not Unique	Used	3.9168e+06	23807302	6.07825	1.07778	0.108065
GPVRLPTk	Unambiguous	40S ribosomal protein S20 [Schizosaccharomyces pombe 972h-]	1	1	19075936	K8(Label:13C(6)15N(2))	HCD	1	0	1	1	471			19637835	Heavy	Unique	Used	3.23083e+06	19637835	6.07827	1.07778	0.108066
QPHIFQNAk	Unambiguous	40S ribosomal protein S11 [Schizosaccharomyces pombe 972h-]	1	1	19115584	K9(Label:13C(6)15N(2))	HCD	1	0	1	1	3021			2.6454e+07	Heavy	Unique	Used	4.07063e+06	24797115	6.09172	1.07848	0.109002
TTYAQSSQIRAIHQk	Unambiguous	40S ribosomal protein S1 [Schizosaccharomyces pombe 972h-]	1	1	19113740	K15(Label:13C(6)15N(2))	HCD	1	0	1	1	2853			1.15297e+08	Heavy	Unique	Used	1.85792e+07	1.13319e+08	6.09922	1.07887	0.109522
VLAVDLLNPSHESEmRk	Unambiguous	40S ribosomal protein S27 [Schizosaccharomyces pombe 972h-]	1	1	19112006	M15(Oxidation); K17(Label:13C(6)15N(2))	HCD	1	0	1	1	1770			3.59663e+07	Heavy	Unique	Used	5.8952e+06	3.59663e+07	6.10095	1.07896	0.109642
NLLAADSHIGSk	Unambiguous	40S ribosomal protein S0B [Schizosaccharomyces pombe 972h-]	1	1	19115325	K12(Label:13C(6)15N(2))	HCD	1	0	1	1	6239			3.44206e+06	Heavy	Unique	Used	511431	3.13004e+06	6.12016	1.07995	0.110968
SAIVQIDAAPFRVWYETHYGILMGSk	Unambiguous	40S ribosomal protein S8 [Schizosaccharomyces pombe 972h-]	2	1	19115431	K26(Label:13C(6)15N(2))	HCD	1	0	1	1	5005			4.76915e+07	Heavy	Unique	Used	7.64552e+06	4.69525e+07	6.14118	1.08103	0.112411
QPHIFQNAk	Unambiguous	40S ribosomal protein S11 [Schizosaccharomyces pombe 972h-]	1	1	19115584	K9(Label:13C(6)15N(2))	HCD	1	0	1	1	6017			2.73396e+06	Heavy	Unique	Used	438765	2.69826e+06	6.14966	1.08147	0.112991
VnGAPLSLVQPEILRmk	Unambiguous	40S ribosomal protein S16 [Schizosaccharomyces pombe 972h-]	1	1	19112530	N2(Deamidated); M16(Oxidation); K17(Label:13C(6)15N(2))	HCD	0.6744	0	1	1	4551			4.42027e+08	Heavy	Unique	Used	7.17958e+07	4.41548e+08	6.15006	1.08149	0.113018
HPEVGVPNLqVIk	Unambiguous	40S ribosomal protein S10 [Schizosaccharomyces pombe 972h-]	2	2	19114930;19112397	Q10(Deamidated); K13(Label:13C(6)15N(2))	HCD	0.0702	0	1	1	4201			5.25284e+07	Heavy	Not Unique	Used	8.37158e+06	5.15328e+07	6.15568	1.08178	0.113402
YALnGREVk	Unambiguous	40S ribosomal protein S4 [Schizosaccharomyces pombe 972h-]	3	2	19112469;19113142	N4(Deamidated); K9(Label:13C(6)15N(2))	HCD	1	0	1	1	3140		1	10393188	Heavy	Not Unique	Used	1.17042e+06	7207904	6.15837	1.08191	0.113585
DQYVPEVSELEVDRVNVDQDTk	Unambiguous	40S ribosomal protein S17 [Schizosaccharomyces pombe 972h-]	1	1	19112037	K22(Label:13C(6)15N(2))	HCD	1	0	1	1	5161			1.85771e+07	Heavy	Unique	Used	2.86568e+06	1.76764e+07	6.1683	1.08242	0.114261
VRTDSTFPTGFMDVISVEk	Unambiguous	40S ribosomal protein S4 [Schizosaccharomyces pombe 972h-]	2	2	19112469;19113142	K19(Label:13C(6)15N(2))	HCD	1	0	1	1	4870			4.80104e+07	Heavy	Not Unique	Used	7.26406e+06	44817445	6.16976	1.08249	0.11436
FmTNRLLQRk	Unambiguous	40S ribosomal protein S24 [Schizosaccharomyces pombe 972h-]	2	2	19112688;19115165	M2(Oxidation); K10(Label:13C(6)15N(2))	HCD	1	0	1	1	527			284285197	Heavy	Not Unique	Used	4.54232e+07	2.80977e+08	6.18575	1.08331	0.115444
WVNQLLPSRQVGVIVLTTSRGIMSHNEARAk	Unambiguous	40S ribosomal protein S22 [Schizosaccharomyces pombe 972h-]	1	1	19114146	K31(Label:13C(6)15N(2))	HCD	1	0	1	1	4733			2.9065e+07	Heavy	Unique	Used	1909164	11810462	6.1862	1.08333	0.115474
GkPAGLnAARk	Unambiguous	40S ribosomal protein S23 [Schizosaccharomyces pombe 972h-]	1	1	19112979	K2(Label:13C(6)15N(2)); N7(Deamidated); K11(Label:13C(6)15N(2))	HCD	1	0	1	1	361		1	19619220	Heavy	Unique	Used	2.35529e+06	14580249	6.19042	1.08354	0.115759
VGALPpTWk	Unambiguous	40S ribosomal protein S13 [Schizosaccharomyces pombe 972h-]	1	1	19114812	P6(Oxidation); K9(Label:13C(6)15N(2))	HCD	1	0	1	1	1287			8.02937e+06	Heavy	Unique	Used	1.29625e+06	8.02937e+06	6.19431	1.08374	0.116022
HIDFALSSpYGGGRpGRCk	Unambiguous	40S ribosomal protein S9 [Schizosaccharomyces pombe 972h-]	2	2	19112632;19113857	P9(Dioxidation); P15(Oxidation); K19(Label:13C(6)15N(2))	HCD	0.1875	0	1	1	5597			1.23371e+08	Heavy	Not Unique	Used	1.95816e+07	121476139	6.20359	1.08421	0.116647
FPFEGVEVk	Unambiguous	40S ribosomal protein S5 [Schizosaccharomyces pombe 972h-]	2	1	19115124	K9(Label:13C(6)15N(2))	HCD	1	0	1	1	2026			5.58343e+07	Heavy	Unique	Used	8240334	51139344	6.20598	1.08433	0.116808
LAGEYGLRNk	Unambiguous	40S ribosomal protein S9 [Schizosaccharomyces pombe 972h-]	2	2	19112632;19113857	K10(Label:13C(6)15N(2))	HCD	1	0	1	1	668			6.78391e+07	Heavy	Not Unique	Used	1.03043e+07	64061134	6.21696	1.08489	0.117545
ATNnIYPLQNVFVRk	Unambiguous	40S ribosomal protein S1 [Schizosaccharomyces pombe 972h-]	1	1	19113740	N4(Deamidated); K15(Label:13C(6)15N(2))	HCD	1	0	1	1	2080			1.19641e+06	Heavy	Unique	Used	187235	1.16449e+06	6.21939	1.08501	0.117707
VGALPpTWk	Unambiguous	40S ribosomal protein S13 [Schizosaccharomyces pombe 972h-]	1	1	19114812	P6(Oxidation); K9(Label:13C(6)15N(2))	HCD	1	0	1	1	6213			2.98071e+06	Heavy	Unique	Used	478559	2.98071e+06	6.2285	1.08547	0.118317
QmVVDILHPGk	Unambiguous	40S ribosomal protein S24 [Schizosaccharomyces pombe 972h-]	2	2	19112688;19115165	M2(Oxidation); K11(Label:13C(6)15N(2))	HCD	1	0	1	1	3678			1.38744e+07	Heavy	Not Unique	Used	2.21753e+06	1.38744e+07	6.25668	1.08688	0.120193
IPSWFLNRQK	Unambiguous	40S ribosomal protein S18 [Schizosaccharomyces pombe 972h-]	1	1	19113298		HCD	1	0	1	1	1876			1.65078e+07	Light	Unique	Used	1.65078e+07	104003441	6.30026	1.08905	0.123066
CVRVQLIk	Unambiguous	40S ribosomal protein S23 [Schizosaccharomyces pombe 972h-]	1	1	19112979	K8(Label:13C(6)15N(2))	HCD	1	0	1	1	5571			1.1497e+08	Heavy	Unique	Used	15139663	95817912	6.32893	1.09046	0.124938
AIHQALFQQGVLVAK	Unambiguous	40S ribosomal protein S10 [Schizosaccharomyces pombe 972h-]	1	1	19112397		HCD	1	0	1	1	1931			1.45867e+06	Light	Unique	Used	1.45867e+06	9251227	6.34222	1.09111	0.1258
kDEGAAPSGFAPSFRGGFGRPQ	Unambiguous	40S ribosomal protein S10 [Schizosaccharomyces pombe 972h-]	1	1	19114930	K1(Label:13C(6)15N(2))	HCD	1	0	1	1	6584			2.55237e+06	Heavy	Unique	Used	270282	1.71477e+06	6.34435	1.09122	0.125938
QIVNVPSFVVRLDTQk	Unambiguous	40S ribosomal protein S9 [Schizosaccharomyces pombe 972h-]	1	1	19113857	K16(Label:13C(6)15N(2))	HCD	1	0	1	1	6987		1	1.15659e+07	Heavy	Unique	Used	753233	4782248	6.34896	1.09144	0.126236
kDDGAAPGGFAPSFRGGFGRPVAA	Unambiguous	40S ribosomal protein S10 [Schizosaccharomyces pombe 972h-]	1	1	19112397	K1(Label:13C(6)15N(2))	HCD	1	0	1	1	4243			2.62883e+07	Heavy	Unique	Used	3.58596e+06	22778932	6.35225	1.0916	0.126449
VFLDNRDAnTVDYk	Unambiguous	40S ribosomal protein S7 [Schizosaccharomyces pombe 972h-]	1	1	19114589	N9(Deamidated); K14(Label:13C(6)15N(2))	HCD	1	0	1	1	3721			4.28683e+07	Heavy	Unique	Used	6.46055e+06	4.10439e+07	6.353	1.09164	0.126497
RLIDLHSPSEIVk	Unambiguous	40S ribosomal protein S20 [Schizosaccharomyces pombe 972h-]	1	1	19075936	K13(Label:13C(6)15N(2))	HCD	1	0	1	1	6552			1.38658e+07	Heavy	Unique	Used	2.10346e+06	13376895	6.35946	1.09196	0.126915
SAIVQIDAApFRVWYETHYGILmGSk	Unambiguous	40S ribosomal protein S8 [Schizosaccharomyces pombe 972h-]	2	1	19115431	P10(Dioxidation); M23(Oxidation); K26(Label:13C(6)15N(2))	HCD	1	0	1	1	4835			52940309	Heavy	Unique	Used	4.39509e+06	28056544	6.38361	1.09313	0.128466
QmVVDILHPGk	Unambiguous	40S ribosomal protein S24 [Schizosaccharomyces pombe 972h-]	2	2	19112688;19115165	M2(Oxidation); K11(Label:13C(6)15N(2))	HCD	1	0	1	1	7725			5.16191e+07	Heavy	Not Unique	Used	7.59679e+06	4.87483e+07	6.41695	1.09474	0.130593
LLELHGESQDVGSk	Unambiguous	40S ribosomal protein S1 [Schizosaccharomyces pombe 972h-]	1	1	19113740	K14(Label:13C(6)15N(2))	HCD	1	0	1	1	3221			218644302	Heavy	Unique	Used	3.28682e+07	213236732	6.48764	1.09812	0.135039
FAGVDIRVRVSGGGHVSQIYAIRQAISk	Unambiguous	40S ribosomal protein S16 [Schizosaccharomyces pombe 972h-]	1	1	19112530	K28(Label:13C(6)15N(2))	HCD	1	0	1	1	4307			5.80951e+07	Heavy	Unique	Used	8.75156e+06	5.69637e+07	6.50897	1.09913	0.136365
RVAAPHHWLLDk	Unambiguous	40S ribosomal protein S4 [Schizosaccharomyces pombe 972h-]	3	2	19112469;19113142	K12(Label:13C(6)15N(2))	HCD	1	0	1	1	925			6.64652e+07	Heavy	Not Unique	Used	10008927	65150083	6.5092	1.09914	0.136379
GRFTVHRITAEEAk	Unambiguous	40S ribosomal protein S4 [Schizosaccharomyces pombe 972h-]	3	2	19112469;19113142	K14(Label:13C(6)15N(2))	HCD	1	0	1	1	2860			1.90372e+07	Heavy	Not Unique	Used	2.57643e+06	16787910	6.51596	1.09946	0.136798
QmVVDILHPGK	Unambiguous	40S ribosomal protein S24 [Schizosaccharomyces pombe 972h-]	2	2	19112688;19115165	M2(Oxidation)	HCD	1	0	1	1	1438			2.57325e+07	Light	Not Unique	Used	2.57325e+07	167701111	6.5171	1.09952	0.136868
RRSDGVHILNLGk	Unambiguous	40S ribosomal protein S0A [Schizosaccharomyces pombe 972h-]	1	1	19112932	K13(Label:13C(6)15N(2))	HCD	1	0	1	1	912		1	1.4583e+07	Heavy	Unique	Used	1.1687e+06	7660407	6.55463	1.10128	0.139177
HPEVGVPnLQVIk	Unambiguous	40S ribosomal protein S10 [Schizosaccharomyces pombe 972h-]	2	2	19114930;19112397	N8(Deamidated); K13(Label:13C(6)15N(2))	HCD	1	0	1	1	4203			3.20199e+07	Heavy	Not Unique	Used	4.07415e+06	26708916	6.5557	1.10133	0.139243
THLRNmIILPEmVGSVVGIYnGk	Unambiguous	40S ribosomal protein S15 [Schizosaccharomyces pombe 972h-]	2	1	19075461	M6(Oxidation); M12(Oxidation); N21(Deamidated); K23(Label:13C(6)15N(2))	HCD	0.0847	0	1	1	4487			48245077	Heavy	Unique	Used	7.07359e+06	46528113	6.57772	1.10235	0.140586
GMSPSQIGVTLRDSHGIPQVRFITGQk	Unambiguous	40S ribosomal protein S13 [Schizosaccharomyces pombe 972h-]	1	1	19114812	K27(Label:13C(6)15N(2))	HCD	1	0	1	1	4491			6.81264e+07	Heavy	Unique	Used	8.2328e+06	54290308	6.59439	1.10313	0.141599
EVSLDETGHIK	Unambiguous	40S ribosomal protein S5 [Schizosaccharomyces pombe 972h-]	1	1	19115124		HCD	1	0	1	1	3114			3.90843e+07	Light	Unique	Used	3.90843e+07	258912212	6.62446	1.10452	0.143413
NLLAADSHIGSk	Unambiguous	40S ribosomal protein S0B [Schizosaccharomyces pombe 972h-]	1	1	19115325	K12(Label:13C(6)15N(2))	HCD	1	0	1	1	6237			4.93784e+06	Heavy	Unique	Used	719101	4.77061e+06	6.63412	1.10496	0.143993
VGALPPTWk	Unambiguous	40S ribosomal protein S13 [Schizosaccharomyces pombe 972h-]	1	1	19114812	K9(Label:13C(6)15N(2))	HCD	1	0	1	1	1553		1	5.819e+08	Heavy	Unique	Used	56393896	376227872	6.67143	1.10667	0.14622
ACQSLDSRGYLk	Unambiguous	40S ribosomal protein S10 [Schizosaccharomyces pombe 972h-]	2	2	19114930;19112397	K12(Label:13C(6)15N(2))	HCD	1	0	1	1	3449			3.09797e+07	Heavy	Not Unique	Used	4.31174e+06	2.89003e+07	6.7027	1.10809	0.148069
AnGLAPELPEDLYNLIk	Unambiguous	40S ribosomal protein S13 [Schizosaccharomyces pombe 972h-]	1	1	19114812	N2(Deamidated); K17(Label:13C(6)15N(2))	HCD	1	0	1	1	7468		1	1.98193e+06	Heavy	Unique	Used	219506	1.48212e+06	6.75207	1.11031	0.150959
TTYAQSSQIRAIRQk	Unambiguous	40S ribosomal protein S1 [Schizosaccharomyces pombe 972h-]	1	1	19114028	K15(Label:13C(6)15N(2))	HCD	1	0	1	1	2881			1.11299e+07	Heavy	Unique	Used	1.40158e+06	9.48602e+06	6.76811	1.11102	0.15189
DQYVPEVSELEVDRVNVDQDTk	Unambiguous	40S ribosomal protein S17 [Schizosaccharomyces pombe 972h-]	1	1	19112037	K22(Label:13C(6)15N(2))	HCD	1	0	1	1	2038			4.65146e+06	Heavy	Unique	Used	617396	4.18772e+06	6.78286	1.11168	0.152743
ImLPEPk	Unambiguous	40S ribosomal protein S3 [Schizosaccharomyces pombe 972h-]	1	1	19113555	M2(Oxidation); K7(Label:13C(6)15N(2))	HCD	1	0	1	1	3389			39805123	Heavy	Unique	Used	5.82527e+06	39805123	6.83318	1.11391	0.155629
VTAFVpHDGCLNFVDENDEVLLSGFGRk	Unambiguous	40S ribosomal protein S23 [Schizosaccharomyces pombe 972h-]	1	1	19112979	P6(Dioxidation); K28(Label:13C(6)15N(2))	HCD	1	0	1	1	4942		1	2.37229e+07	Heavy	Unique	Used	748424	5.13104e+06	6.85579	1.1149	0.156913
RMGQEVPGDSVGPEFAGYVFk	Unambiguous	40S ribosomal protein S6 [Schizosaccharomyces pombe 972h-]	2	1	19113745	K21(Label:13C(6)15N(2))	HCD	1	0	1	1	6954			2.29299e+07	Heavy	Unique	Used	2.27981e+06	1.56389e+07	6.85974	1.11507	0.157137
QLEDGRTLSDYNIQk	Unambiguous	ubiquitin-40S ribosomal protein S31 fusion protein [Schizosaccharomyces pombe 972h-]	4	1	19114970	K15(Label:13C(6)15N(2))	HCD	1	0	1	1	6441			3.85355e+06	Heavy	Unique	Used	533369	3.66431e+06	6.87012	1.11553	0.157723
RLIDLHSPSEIVk	Unambiguous	40S ribosomal protein S20 [Schizosaccharomyces pombe 972h-]	1	1	19075936	K13(Label:13C(6)15N(2))	HCD	1	0	1	1	1608			1.4094e+07	Heavy	Unique	Used	2.03709e+06	1.4094e+07	6.91871	1.11764	0.160449
TDASAVQAFGLRTHYGGGRTTGFALIYDDVEAMk	Unambiguous	40S ribosomal protein S24 [Schizosaccharomyces pombe 972h-]	1	1	19115165	K34(Label:13C(6)15N(2))	HCD	1	0	1	1	7507			1.49994e+07	Heavy	Unique	Used	1.47075e+06	10181367	6.92255	1.1178	0.160663
LLELHGESQDVGSk	Unambiguous	40S ribosomal protein S1 [Schizosaccharomyces pombe 972h-]	1	1	19113740	K14(Label:13C(6)15N(2))	HCD	1	0	1	1	6228			919504	Heavy	Unique	Used	121626	842000	6.92286	1.11781	0.160681
THLRNMIILPEmVGSVVGIYNGk	Unambiguous	40S ribosomal protein S15 [Schizosaccharomyces pombe 972h-]	2	1	19075461	M12(Oxidation); K23(Label:13C(6)15N(2))	HCD	0.3571	0	1	1	4665		1	2.42962e+07	Heavy	Unique	Used	1067212	7406199	6.93976	1.11854	0.16162
LNISYPAnGTQk	Unambiguous	40S ribosomal protein S6 [Schizosaccharomyces pombe 972h-]	2	1	19113745	N8(Deamidated); K12(Label:13C(6)15N(2))	HCD	0.3647	0	1	1	1365			6.80968e+08	Heavy	Unique	Used	9.78497e+07	679184091	6.94109	1.1186	0.161694
IPSWFLnRQk	Unambiguous	40S ribosomal protein S18 [Schizosaccharomyces pombe 972h-]	1	1	19113298	N7(Deamidated); K10(Label:13C(6)15N(2))	HCD	1	0	1	1	2004			2.19431e+06	Heavy	Unique	Used	291161	2.02307e+06	6.94828	1.11891	0.162092
ATSTPNPk	Unambiguous	40S ribosomal protein S8 [Schizosaccharomyces pombe 972h-]	1	1	19115431	K8(Label:13C(6)15N(2))	HCD	1	0	1	1	2657			502232	Heavy	Unique	Used	70959.9	493283	6.95157	1.11905	0.162274
RRSDGVHILNLGk	Unambiguous	40S ribosomal protein S0A [Schizosaccharomyces pombe 972h-]	1	1	19112932	K13(Label:13C(6)15N(2))	HCD	1	0	1	1	918			125737110	Heavy	Unique	Used	1.78118e+07	1.24811e+08	7.00725	1.12142	0.165333
INVDqDTk	Unambiguous	40S ribosomal protein S17 [Schizosaccharomyces pombe 972h-]	1	1	19075512	Q5(Deamidated); K8(Label:13C(6)15N(2))	HCD	0.4146	0	1	1	451		1	2.00175e+07	Heavy	Unique	Used	2.25935e+06	15908218	7.04107	1.12285	0.167169
ImLPEPk	Unambiguous	40S ribosomal protein S3 [Schizosaccharomyces pombe 972h-]	1	1	19113555	M2(Oxidation); K7(Label:13C(6)15N(2))	HCD	1	0	1	1	1232			3.29991e+08	Heavy	Unique	Used	4.61775e+07	3.25497e+08	7.04882	1.12318	0.167588
VRTDSTFPTGFMDVISVEk	Unambiguous	40S ribosomal protein S4 [Schizosaccharomyces pombe 972h-]	2	2	19112469;19113142	K19(Label:13C(6)15N(2))	HCD	1	0	1	1	7125			3.2206e+07	Heavy	Not Unique	Used	3.12117e+06	22113805	7.0851	1.1247	0.169539
VNGAPLSLVQPEILRmk	Unambiguous	40S ribosomal protein S16 [Schizosaccharomyces pombe 972h-]	1	1	19112530	M16(Oxidation); K17(Label:13C(6)15N(2))	HCD	0.617	0	1	1	4480			4.10076e+07	Heavy	Unique	Used	5.4552e+06	3.88845e+07	7.12797	1.12648	0.17182
RLIDLHSPSEIVk	Unambiguous	40S ribosomal protein S20 [Schizosaccharomyces pombe 972h-]	1	1	19075936	K13(Label:13C(6)15N(2))	HCD	1	0	1	1	3851			2.64344e+07	Heavy	Unique	Used	2.90693e+06	20743773	7.13596	1.12681	0.172243
EVSLDETGHIk	Unambiguous	40S ribosomal protein S5 [Schizosaccharomyces pombe 972h-]	1	1	19115124	K11(Label:13C(6)15N(2))	HCD	1	0	1	1	6152			4.40395e+06	Heavy	Unique	Used	615784	4.40395e+06	7.15178	1.12746	0.173078
VVQSLEK	Unambiguous	40S ribosomal protein S19 [Schizosaccharomyces pombe 972h-]	2	2	19113385;19112013		HCD	1	0	1	1	6179		1	52708.4	Light	Not Unique	Used	52708.4	376982	7.15221	1.12748	0.1731
VDELTVDFVGVGk	Unambiguous	40S ribosomal protein cpc2/RACK1 [Schizosaccharomyces pombe 972h-]	1	1	19114682	K13(Label:13C(6)15N(2))	HCD	1	0	1	1	2098			686890	Heavy	Unique	Used	88071.3	634370	7.20292	1.12955	0.175753
TDASAVQAFGLRTHYGGGRTTGFALIYDDVEAMk	Unambiguous	40S ribosomal protein S24 [Schizosaccharomyces pombe 972h-]	1	1	19115165	K34(Label:13C(6)15N(2))	HCD	1	0	1	1	7248		1	2.09494e+06	Heavy	Unique	Used	290766	2.09494e+06	7.20492	1.12964	0.175857
kDEGAAPSGFAPSFRGGFGRPQ	Unambiguous	40S ribosomal protein S10 [Schizosaccharomyces pombe 972h-]	1	1	19114930	K1(Label:13C(6)15N(2))	HCD	1	0	1	1	1649			8424087	Heavy	Unique	Used	1.16858e+06	8424087	7.20882	1.12979	0.17606
THLRNMIILPEmVGSVVGIYNGk	Unambiguous	40S ribosomal protein S15 [Schizosaccharomyces pombe 972h-]	2	1	19075461	M12(Oxidation); K23(Label:13C(6)15N(2))	HCD	0.2075	0	1	1	6992			1.18456e+07	Heavy	Unique	Used	1.4906e+06	1.07922e+07	7.24014	1.13106	0.17768
qmVVDILHPGk	Unambiguous	40S ribosomal protein S24 [Schizosaccharomyces pombe 972h-]	2	2	19112688;19115165	Q1(Deamidated); M2(Oxidation); K11(Label:13C(6)15N(2))	HCD	1	0	1	1	3853		1	1.59227e+07	Heavy	Not Unique	Used	1.6045e+06	11714251	7.30088	1.1335	0.180788
FAGVDIRVRVSGGGHVSQIYAIRQAISk	Unambiguous	40S ribosomal protein S16 [Schizosaccharomyces pombe 972h-]	1	1	19112530	K28(Label:13C(6)15N(2))	HCD	1	0	1	1	5134			1.11165e+07	Heavy	Unique	Used	1.34755e+06	9.89366e+06	7.34195	1.13513	0.182863
GRFTVHRITAEEAk	Unambiguous	40S ribosomal protein S4 [Schizosaccharomyces pombe 972h-]	3	2	19112469;19113142	K14(Label:13C(6)15N(2))	HCD	1	0	1	1	321			257337265	Heavy	Not Unique	Used	3.45475e+07	255447289	7.39408	1.13719	0.185469
kADIDmSk	Unambiguous	40S ribosomal protein S18 [Schizosaccharomyces pombe 972h-]	1	1	19113298	K1(Label:13C(6)15N(2)); M6(Oxidation); K8(Label:13C(6)15N(2))	HCD	1	0	1	1	2643			3.96916e+07	Heavy	Unique	Used	4.97156e+06	36853000	7.41276	1.13792	0.186395
THLRNmIILPEmVGSVVGIYnGk	Unambiguous	40S ribosomal protein S15 [Schizosaccharomyces pombe 972h-]	2	1	19075461	M6(Oxidation); M12(Oxidation); N21(Deamidated); K23(Label:13C(6)15N(2))	HCD	0.2812	0	1	1	6888			5.61892e+07	Heavy	Unique	Used	7.46109e+06	5.61892e+07	7.53097	1.14247	0.192161
kDDGAAPGGFAPSFRGGFGRPVAA	Unambiguous	40S ribosomal protein S10 [Schizosaccharomyces pombe 972h-]	1	1	19112397	K1(Label:13C(6)15N(2))	HCD	1	0	1	1	6675			9.51262e+06	Heavy	Unique	Used	1.11857e+06	8.44332e+06	7.54832	1.14313	0.192994
SAIVQIDAAPFRVWYETHYGILmGSk	Unambiguous	40S ribosomal protein S8 [Schizosaccharomyces pombe 972h-]	2	1	19115431	M23(Oxidation); K26(Label:13C(6)15N(2))	HCD	1	0	1	1	7192			1.78671e+07	Heavy	Unique	Used	1.21827e+06	9.20708e+06	7.55752	1.14348	0.193435
EYQIVDYFLpRLNDEVMk	Unambiguous	40S ribosomal protein S2 [Schizosaccharomyces pombe 972h-]	1	1	19075935	P10(Dioxidation); K18(Label:13C(6)15N(2))	HCD	1	0	1	1	7329		1	24642191	Heavy	Unique	Used	1.13124e+06	8552284	7.56011	1.14358	0.193558
VnGAPLSLVQPEILRmk	Unambiguous	40S ribosomal protein S16 [Schizosaccharomyces pombe 972h-]	1	1	19112530	N2(Deamidated); M16(Oxidation); K17(Label:13C(6)15N(2))	HCD	0.6038	0	1	1	4532			95622321	Heavy	Unique	Used	11759874	89019442	7.56976	1.14395	0.194019
VMFAMTQIk	Unambiguous	40S ribosomal protein S18 [Schizosaccharomyces pombe 972h-]	1	1	19113298	K9(Label:13C(6)15N(2))	HCD	1	0	1	1	2137		1	951793	Heavy	Unique	Used	86564.4	655272	7.56977	1.14395	0.194019
SIEEIYLYSLPIk	Unambiguous	40S ribosomal protein S2 [Schizosaccharomyces pombe 972h-]	1	1	19075935	K13(Label:13C(6)15N(2))	HCD	1	0	1	1	7264			1.86557e+07	Heavy	Unique	Used	2.35994e+06	1.78669e+07	7.5709	1.14399	0.194074
VmFAMTQIk	Unambiguous	40S ribosomal protein S18 [Schizosaccharomyces pombe 972h-]	1	1	19113298	M2(Oxidation); K9(Label:13C(6)15N(2))	HCD	1	0	1	1	1929			1.00611e+07	Heavy	Unique	Used	1.31769e+06	1.00611e+07	7.63542	1.14641	0.197126
HGRPGIGATHSSRFIPLk	Unambiguous	40S ribosomal protein S15 [Schizosaccharomyces pombe 972h-]	2	1	19075461	K18(Label:13C(6)15N(2))	HCD	1	0	1	1	2942			2.11437e+09	Heavy	Unique	Used	2.70853e+08	2110587074	7.79237	1.15218	0.204367
kDEGAAPSGFAPSFRGGFGRPQ	Unambiguous	40S ribosomal protein S10 [Schizosaccharomyces pombe 972h-]	1	1	19114930	K1(Label:13C(6)15N(2))	HCD	1	0	1	1	4099			51948575	Heavy	Unique	Used	4.45475e+06	34836487	7.82008	1.15318	0.205619
VPRRPFESARLDAELk	Unambiguous	40S ribosomal protein S9 [Schizosaccharomyces pombe 972h-]	2	2	19112632;19113857	K16(Label:13C(6)15N(2))	HCD	1	0	1	1	2493			5.01117e+07	Heavy	Not Unique	Used	5.3526e+06	41905807	7.82906	1.1535	0.206023
GkPAGLnAARk	Unambiguous	40S ribosomal protein S23 [Schizosaccharomyces pombe 972h-]	1	1	19112979	K2(Label:13C(6)15N(2)); N7(Deamidated); K11(Label:13C(6)15N(2))	HCD	1	0	1	1	5895		1	4.27227e+06	Heavy	Unique	Used	387025	3.0333e+06	7.83746	1.15381	0.2064
VPRRPFESARLDAELk	Unambiguous	40S ribosomal protein S9 [Schizosaccharomyces pombe 972h-]	2	2	19112632;19113857	K16(Label:13C(6)15N(2))	HCD	1	0	1	1	1266			2.1746e+07	Heavy	Not Unique	Used	2.44528e+06	19213152	7.85725	1.15451	0.207286
TRIIQVAYHPSNNELVRTnTLTk	Unambiguous	40S ribosomal protein S8 [Schizosaccharomyces pombe 972h-]	2	1	19115431	N19(Deamidated); K23(Label:13C(6)15N(2))	HCD	0.4831	0	1	1	3860			52816664	Heavy	Unique	Used	6.68922e+06	52816664	7.89578	1.15589	0.208999
ELRPLQITSAREVEVGGGkk	Unambiguous	40S ribosomal protein S7 [Schizosaccharomyces pombe 972h-]	1	1	19114589	K19(Label:13C(6)15N(2)); K20(Label:13C(6)15N(2))	HCD	1	0	1	1	3459		1	4.35522e+07	Heavy	Unique	Used	1.92915e+06	15299276	7.93059	1.15712	0.210535
SFQLLANnVDSk	Unambiguous	40S ribosomal protein S18 [Schizosaccharomyces pombe 972h-]	1	1	19113298	N8(Deamidated); K12(Label:13C(6)15N(2))	HCD	1	0	1	1	4573		1	1.59656e+07	Heavy	Unique	Used	1.08015e+06	8678133	8.03417	1.16073	0.215035
FMTnRLLQRk	Unambiguous	40S ribosomal protein S24 [Schizosaccharomyces pombe 972h-]	2	2	19112688;19115165	N4(Deamidated); K10(Label:13C(6)15N(2))	HCD	1	0	1	1	3403			8.64557e+07	Heavy	Not Unique	Used	9.84156e+06	79392968	8.06711	1.16187	0.216444
ANGLAPELPEDLYnLIk	Unambiguous	40S ribosomal protein S13 [Schizosaccharomyces pombe 972h-]	1	1	19114812	N14(Deamidated); K17(Label:13C(6)15N(2))	HCD	1	0	1	1	5080			2.71222e+07	Heavy	Unique	Used	3.22025e+06	26144157	8.11866	1.16363	0.21863
RLIDLHSPSEIVk	Unambiguous	40S ribosomal protein S20 [Schizosaccharomyces pombe 972h-]	1	1	19075936	K13(Label:13C(6)15N(2))	HCD	1	0	1	1	3826			509140100	Heavy	Unique	Used	52424314	425836640	8.12288	1.16377	0.218808
AILmQRLIk	Unambiguous	40S ribosomal protein S4 [Schizosaccharomyces pombe 972h-]	2	1	19113142	M4(Oxidation); K9(Label:13C(6)15N(2))	HCD	1	0	1	1	3349			5.99501e+07	Heavy	Unique	Used	7.24183e+06	5.91552e+07	8.16854	1.16532	0.220722
SFQLLANNVDSk	Unambiguous	40S ribosomal protein S18 [Schizosaccharomyces pombe 972h-]	1	1	19113298	K12(Label:13C(6)15N(2))	HCD	1	0	1	1	7062		1	7.48968e+06	Heavy	Unique	Used	602113	4.99031e+06	8.288	1.1693	0.225641
TRIIQVAYHPSnNELVRTNTLTk	Unambiguous	40S ribosomal protein S8 [Schizosaccharomyces pombe 972h-]	2	1	19115431	N12(Deamidated); K23(Label:13C(6)15N(2))	HCD	0.1512	0	1	1	1644		1	1.92871e+07	Heavy	Unique	Used	565256	4.70604e+06	8.3255	1.17053	0.22716
VGALPpTWk	Unambiguous	40S ribosomal protein S13 [Schizosaccharomyces pombe 972h-]	1	1	19114812	P6(Dioxidation); K9(Label:13C(6)15N(2))	HCD	1	0	1	1	3484			60173705	Heavy	Unique	Used	6.87954e+06	58051446	8.43828	1.17418	0.231654
kDDGAAPGGFAPSFRGGFGRPVAA	Unambiguous	40S ribosomal protein S10 [Schizosaccharomyces pombe 972h-]	1	1	19112397	K1(Label:13C(6)15N(2))	HCD	1	0	1	1	5698			4.2755e+07	Heavy	Unique	Used	4247547	36620724	8.62162	1.17996	0.238739
DQYVPEVSELEk	Unambiguous	40S ribosomal protein S17 [Schizosaccharomyces pombe 972h-]	1	1	19075512	K12(Label:13C(6)15N(2))	HCD	1	0	1	1	7065		1	1.01082e+07	Heavy	Unique	Used	640937	5.64399e+06	8.80585	1.18558	0.245594
WVNQLLPSRQVGVIVLTTSRGIMSHNEARAk	Unambiguous	40S ribosomal protein S22 [Schizosaccharomyces pombe 972h-]	1	1	19114146	K31(Label:13C(6)15N(2))	HCD	1	0	1	1	5789			2.86746e+07	Heavy	Unique	Used	2.28273e+06	2.02289e+07	8.86173	1.18725	0.247623
DQYVPEVSELEVDRVNVDQDTk	Unambiguous	40S ribosomal protein S17 [Schizosaccharomyces pombe 972h-]	1	1	19112037	K22(Label:13C(6)15N(2))	HCD	1	0	1	1	5206		1	3.39436e+06	Heavy	Unique	Used	87288.2	779409	8.92915	1.18924	0.250041
AILmQRLIk	Unambiguous	40S ribosomal protein S4 [Schizosaccharomyces pombe 972h-]	2	1	19113142	M4(Oxidation); K9(Label:13C(6)15N(2))	HCD	1	0	1	1	3364			51056668	Heavy	Unique	Used	5.69109e+06	51056668	8.97133	1.19048	0.251537
kDEGAAPSGFAPSFRGGFGRPQ	Unambiguous	40S ribosomal protein S10 [Schizosaccharomyces pombe 972h-]	1	1	19114930	K1(Label:13C(6)15N(2))	HCD	1	0	1	1	3895			96356927	Heavy	Unique	Used	9.34579e+06	83916304	8.97905	1.1907	0.25181
ATSTPNPk	Unambiguous	40S ribosomal protein S8 [Schizosaccharomyces pombe 972h-]	1	1	19115431	K8(Label:13C(6)15N(2))	HCD	1	0	1	1	2801		1	574866	Heavy	Unique	Used	53863.2	493136	9.15534	1.19575	0.257921
RVNPAAIAk	Unambiguous	40S ribosomal protein S26 [Schizosaccharomyces pombe 972h-]	1	1	19113765	K9(Label:13C(6)15N(2))	HCD	1	0	1	1	2772			2.20557e+07	Heavy	Unique	Used	2.27478e+06	2.11122e+07	9.28101	1.19927	0.262151
IQTHRGLRHALDLRVRGQHTk	Unambiguous	40S ribosomal protein S18 [Schizosaccharomyces pombe 972h-]	1	1	19113298	K21(Label:13C(6)15N(2))	HCD	1	0	1	1	254		1	31834065	Heavy	Unique	Used	962546	8988543	9.3383	1.20084	0.264046
LFNQVEIRPEMIGHYLGEFSITYkPTk	Unambiguous	40S ribosomal protein S15 [Schizosaccharomyces pombe 972h-]	2	1	19075461	K24(Label:13C(6)15N(2)); K27(Label:13C(6)15N(2))	HCD	1	0	1	1	4938			1.53804e+08	Heavy	Unique	Used	14568633	137758202	9.45581	1.20403	0.267867
GIVVEkIGVEAk	Unambiguous	40S ribosomal protein S23 [Schizosaccharomyces pombe 972h-]	1	1	19112979	K6(Label:13C(6)15N(2)); K12(Label:13C(6)15N(2))	HCD	1	0	1	1	1250		1	9845931	Heavy	Unique	Used	631999	6.10802e+06	9.6646	1.20954	0.274453
VRTDSTFPTGFMDVISVEk	Unambiguous	40S ribosomal protein S4 [Schizosaccharomyces pombe 972h-]	2	2	19112469;19113142	K19(Label:13C(6)15N(2))	HCD	1	0	1	1	4854			38017214	Heavy	Not Unique	Used	3923693	38017214	9.68914	1.21017	0.27521
AIVVFVPQPLLk	Unambiguous	40S ribosomal protein S7 [Schizosaccharomyces pombe 972h-]	1	1	19114589	K12(Label:13C(6)15N(2))	HCD	1	0	1	1	7157			5.20456e+06	Heavy	Unique	Used	535745	5.20456e+06	9.71464	1.21083	0.275993
ATSTPNPk	Unambiguous	40S ribosomal protein S8 [Schizosaccharomyces pombe 972h-]	1	1	19115431	K8(Label:13C(6)15N(2))	HCD	1	0	1	1	2662		1	368214	Heavy	Unique	Used	37678.8	368214	9.77246	1.21231	0.277755
GVPFLVTHDGRTIRYPDPLIk	Unambiguous	40S ribosomal protein S4 [Schizosaccharomyces pombe 972h-]	3	2	19112469;19113142	K21(Label:13C(6)15N(2))	HCD	1	0	1	1	5716		1	157910867	Heavy	Not Unique	Used	4.77472e+06	46690572	9.7787	1.21247	0.277944
kADIDmSk	Unambiguous	40S ribosomal protein S18 [Schizosaccharomyces pombe 972h-]	1	1	19113298	K1(Label:13C(6)15N(2)); M6(Oxidation); K8(Label:13C(6)15N(2))	HCD	1	0	1	1	25			1.11244e+08	Heavy	Unique	Used	10489034	103393314	9.85728	1.21445	0.280307
TDRDESSPYAAmLAAQDAAAk	Unambiguous	40S ribosomal protein S14 [Schizosaccharomyces pombe 972h-]	1	1	19115099	M12(Oxidation); K21(Label:13C(6)15N(2))	HCD	0.5694	0	1	1	1376		1	3.3636e+07	Heavy	Unique	Used	1.17799e+06	11731815	9.95917	1.21699	0.283321
AIHQALFSqGVLVAk	Unambiguous	40S ribosomal protein S10 [Schizosaccharomyces pombe 972h-]	1	1	19114930	Q9(Deamidated); K15(Label:13C(6)15N(2))	HCD	0.0789	0	1	1	1903		1	1.9371e+06	Heavy	Unique	Used	103211	1.03332e+06	10.0117	1.21829	0.284854
GkPAGLNAARk	Unambiguous	40S ribosomal protein S23 [Schizosaccharomyces pombe 972h-]	1	1	19112979	K2(Label:13C(6)15N(2)); K11(Label:13C(6)15N(2))	HCD	1	0	1	1	93			8.24156e+06	Heavy	Unique	Used	800230	8.08409e+06	10.1022	1.22049	0.287459
LFNQVEIRPEMIGHYLGEFSITYkPTk	Unambiguous	40S ribosomal protein S15 [Schizosaccharomyces pombe 972h-]	2	1	19075461	K24(Label:13C(6)15N(2)); K27(Label:13C(6)15N(2))	HCD	1	0	1	1	7202			392911846	Heavy	Unique	Used	3.86561e+07	392911846	10.1643	1.22198	0.289222
ELRPLQITSAREVEVGGGkk	Unambiguous	40S ribosomal protein S7 [Schizosaccharomyces pombe 972h-]	1	1	19114589	K19(Label:13C(6)15N(2)); K20(Label:13C(6)15N(2))	HCD	1	0	1	1	3465			2.9988e+08	Heavy	Unique	Used	2.89437e+07	298624296	10.3174	1.2256	0.29349
VTAFVpHDGCLNFVDENDEVLLSGFGRk	Unambiguous	40S ribosomal protein S23 [Schizosaccharomyces pombe 972h-]	1	1	19112979	P6(Dioxidation); K28(Label:13C(6)15N(2))	HCD	1	0	1	1	4937		1	2.12452e+07	Heavy	Unique	Used	379463	3923709	10.3402	1.22613	0.294114
FEPHYRLVRVGQAEPIQk	Unambiguous	40S ribosomal protein S24 [Schizosaccharomyces pombe 972h-]	1	1	19112688	K18(Label:13C(6)15N(2))	HCD	1	0	1	1	5460			54515045	Heavy	Unique	Used	4.94588e+06	5.12305e+07	10.3582	1.22655	0.294608
LFNQVEIRPEMIGHYLGEFSITYkPTk	Unambiguous	40S ribosomal protein S15 [Schizosaccharomyces pombe 972h-]	2	1	19075461	K24(Label:13C(6)15N(2)); K27(Label:13C(6)15N(2))	HCD	1	0	1	1	4955			1.24744e+08	Heavy	Unique	Used	1.15922e+07	1.20762e+08	10.4175	1.22792	0.296219
FRLILIESRIHRLARYYRkVGALPPTWk	Unambiguous	40S ribosomal protein S13 [Schizosaccharomyces pombe 972h-]	1	1	19114812	K19(Label:13C(6)15N(2)); K28(Label:13C(6)15N(2))	HCD	1	0	1	1	7878			6.2994e+07	Heavy	Unique	Used	5.20504e+06	54650526	10.4995	1.2298	0.29842
ANGLAPELPEDLYnLIk	Unambiguous	40S ribosomal protein S13 [Schizosaccharomyces pombe 972h-]	1	1	19114812	N14(Deamidated); K17(Label:13C(6)15N(2))	HCD	1	0	1	1	7345		1	2.21799e+07	Heavy	Unique	Used	837712	8944182	10.6769	1.23377	0.303075
LFNQVEIRPEmIGHYLGEFSITYkPTk	Unambiguous	40S ribosomal protein S15 [Schizosaccharomyces pombe 972h-]	2	1	19075461	M11(Oxidation); K24(Label:13C(6)15N(2)); K27(Label:13C(6)15N(2))	HCD	1	0	1	1	7088			7.95501e+08	Heavy	Unique	Used	74444576	7.95051e+08	10.6798	1.23383	0.303148
EYQIVDYFLPRLnDEVMk	Unambiguous	40S ribosomal protein S2 [Schizosaccharomyces pombe 972h-]	1	1	19075935	N13(Deamidated); K18(Label:13C(6)15N(2))	HCD	1	0	1	1	7389		1	3.16174e+06	Heavy	Unique	Used	108817	1.17133e+06	10.7643	1.23569	0.305316
LFNQVEIRPEmIGHYLGEFSITYkPTk	Unambiguous	40S ribosomal protein S15 [Schizosaccharomyces pombe 972h-]	2	1	19075461	M11(Oxidation); K24(Label:13C(6)15N(2)); K27(Label:13C(6)15N(2))	HCD	0.082	0	1	1	4825			4.29827e+08	Heavy	Unique	Used	34970021	377354336	10.7908	1.23627	0.30599
kADIDmSk	Unambiguous	40S ribosomal protein S18 [Schizosaccharomyces pombe 972h-]	1	1	19113298	K1(Label:13C(6)15N(2)); M6(Oxidation); K8(Label:13C(6)15N(2))	HCD	1	0	1	1	2675		1	6.02674e+06	Heavy	Unique	Used	468740	5.07124e+06	10.8189	1.23688	0.3067
LFNQVEIRPEmIGHYLGEFSITYkPTk	Unambiguous	40S ribosomal protein S15 [Schizosaccharomyces pombe 972h-]	2	1	19075461	M11(Oxidation); K24(Label:13C(6)15N(2)); K27(Label:13C(6)15N(2))	HCD	0.0873	0	1	1	7082			5.69576e+08	Heavy	Unique	Used	5.22728e+07	568144952	10.8688	1.23795	0.307956
ELRPLQITSAREVEVGGGkk	Unambiguous	40S ribosomal protein S7 [Schizosaccharomyces pombe 972h-]	1	1	19114589	K19(Label:13C(6)15N(2)); K20(Label:13C(6)15N(2))	HCD	1	0	1	1	1360			3.07556e+08	Heavy	Unique	Used	2.73766e+07	300274670	10.9683	1.24007	0.310425
GkPAGLNAARk	Unambiguous	40S ribosomal protein S23 [Schizosaccharomyces pombe 972h-]	1	1	19112979	K2(Label:13C(6)15N(2)); K11(Label:13C(6)15N(2))	HCD	1	0	1	1	14			6.31319e+08	Heavy	Unique	Used	5.74513e+07	630615689	10.9765	1.24025	0.310627
TLGnFVk	Unambiguous	40S ribosomal protein S2 [Schizosaccharomyces pombe 972h-]	1	1	19075935	N4(Deamidated); K7(Label:13C(6)15N(2))	HCD	1	0	1	1	1385		1	8.69855e+06	Heavy	Unique	Used	642102	7182236	11.1855	1.2446	0.315678
LFNQVEIRPEmIGHYLGEFSITYkPTk	Unambiguous	40S ribosomal protein S15 [Schizosaccharomyces pombe 972h-]	2	1	19075461	M11(Oxidation); K24(Label:13C(6)15N(2)); K27(Label:13C(6)15N(2))	HCD	0.026	0	1	1	4807			5.73911e+08	Heavy	Unique	Used	5.06066e+07	572680803	11.3163	1.24725	0.318754
VPRRPFESARLDAELk	Unambiguous	40S ribosomal protein S9 [Schizosaccharomyces pombe 972h-]	2	2	19112632;19113857	K16(Label:13C(6)15N(2))	HCD	1	0	1	1	5499		1	278629436	Heavy	Not Unique	Used	9633688	109061944	11.3209	1.24734	0.31886
KFEPHYRLVRVGHAEPIQK	Unambiguous	40S ribosomal protein S24 [Schizosaccharomyces pombe 972h-]	1	1	19115165		HCD	1	0	1	1	5379			1.14003e+08	Light	Unique	Used	1.14003e+08	1298784718	11.3925	1.24878	0.320515
RRSDGVHILNLGk	Unambiguous	40S ribosomal protein S0A [Schizosaccharomyces pombe 972h-]	1	1	19112932	K13(Label:13C(6)15N(2))	HCD	1	0	1	1	914			2.72947e+07	Heavy	Unique	Used	2.24537e+06	25802517	11.4914	1.25073	0.322771
KFEPHYRLVRVGHAEPIQK	Unambiguous	40S ribosomal protein S24 [Schizosaccharomyces pombe 972h-]	1	1	19115165		HCD	1	0	1	1	2373			4.38678e+07	Light	Unique	Used	4.38678e+07	506036123	11.5355	1.25159	0.323763
kDELERVAk	Unambiguous	40S ribosomal protein S5 [Schizosaccharomyces pombe 972h-]	2	1	19115124	K1(Label:13C(6)15N(2)); K9(Label:13C(6)15N(2))	HCD	1	0	1	1	225			6.70038e+07	Heavy	Unique	Used	5.76972e+06	6.70038e+07	11.613	1.25309	0.325494
kADIDmSk	Unambiguous	40S ribosomal protein S18 [Schizosaccharomyces pombe 972h-]	1	1	19113298	K1(Label:13C(6)15N(2)); M6(Oxidation); K8(Label:13C(6)15N(2))	HCD	1	0	1	1	148			6.56268e+07	Heavy	Unique	Used	5.40542e+06	63174736	11.6873	1.25452	0.327133
kADIDMSk	Unambiguous	40S ribosomal protein S18 [Schizosaccharomyces pombe 972h-]	1	1	19113298	K1(Label:13C(6)15N(2)); K8(Label:13C(6)15N(2))	HCD	1	0	1	1	219			2.70482e+08	Heavy	Unique	Used	2.26e+07	265024950	11.7268	1.25527	0.327997
kDDGAAPGGFAPSFRGGFGRPVAA	Unambiguous	40S ribosomal protein S10 [Schizosaccharomyces pombe 972h-]	1	1	19112397	K1(Label:13C(6)15N(2))	HCD	1	0	1	1	7790			3.60169e+06	Heavy	Unique	Used	303890	3.60169e+06	11.8519	1.25762	0.330699
VGALPpTWk	Unambiguous	40S ribosomal protein S13 [Schizosaccharomyces pombe 972h-]	1	1	19114812	P6(Oxidation); K9(Label:13C(6)15N(2))	HCD	1	0	1	1	6378			1.78787e+06	Heavy	Unique	Used	138416	1.678e+06	12.1228	1.26258	0.336373
GkPAGLNAARk	Unambiguous	40S ribosomal protein S23 [Schizosaccharomyces pombe 972h-]	1	1	19112979	K2(Label:13C(6)15N(2)); K11(Label:13C(6)15N(2))	HCD	1	0	1	1	95			1.84665e+07	Heavy	Unique	Used	1.51826e+06	1.84665e+07	12.1629	1.2633	0.337192
GkPAGLnAARk	Unambiguous	40S ribosomal protein S23 [Schizosaccharomyces pombe 972h-]	1	1	19112979	K2(Label:13C(6)15N(2)); N7(Deamidated); K11(Label:13C(6)15N(2))	HCD	1	0	1	1	166		1	152365704	Heavy	Unique	Used	9061228	111049280	12.2554	1.26494	0.339067
KFEPHYRLVRVGQAEPIQK	Unambiguous	40S ribosomal protein S24 [Schizosaccharomyces pombe 972h-]	1	1	19112688		HCD	1	0	1	1	2454			1.08662e+08	Light	Unique	Used	1.08662e+08	1340864432	12.3398	1.26642	0.340753
kGmSPSQIGVTLRDSHGIPQVRFITGQk	Unambiguous	40S ribosomal protein S13 [Schizosaccharomyces pombe 972h-]	1	1	19114812	K1(Label:13C(6)15N(2)); M3(Oxidation); K28(Label:13C(6)15N(2))	HCD	0.217	0	1	1	1856			1.28769e+08	Heavy	Unique	Used	1.04144e+07	1.28769e+08	12.3645	1.26685	0.341242
LFNQVEIRPEMIGHYLGEFSITYkPTk	Unambiguous	40S ribosomal protein S15 [Schizosaccharomyces pombe 972h-]	2	1	19075461	K24(Label:13C(6)15N(2)); K27(Label:13C(6)15N(2))	HCD	1	0	1	1	7208			2.72758e+08	Heavy	Unique	Used	1.95396e+07	241831216	12.3765	1.26706	0.34148
GkPAGLnAARk	Unambiguous	40S ribosomal protein S23 [Schizosaccharomyces pombe 972h-]	1	1	19112979	K2(Label:13C(6)15N(2)); N7(Deamidated); K11(Label:13C(6)15N(2))	HCD	1	0	1	1	161			138044162	Heavy	Unique	Used	1.11433e+07	138044162	12.3881	1.26726	0.34171
kFEPHYRLVRVGHAEPIQk	Unambiguous	40S ribosomal protein S24 [Schizosaccharomyces pombe 972h-]	1	1	19115165	K1(Label:13C(6)15N(2)); K19(Label:13C(6)15N(2))	HCD	1	0	1	1	3039			2.68725e+08	Heavy	Unique	Used	2.08257e+07	261797296	12.5709	1.27038	0.345266
kFEPHYRLVRVGQAEPIQk	Unambiguous	40S ribosomal protein S24 [Schizosaccharomyces pombe 972h-]	1	1	19112688	K1(Label:13C(6)15N(2)); K19(Label:13C(6)15N(2))	HCD	1	0	1	1	5454			3002901674	Heavy	Unique	Used	2.34389e+08	3000008940	12.7993	1.27419	0.34958
TDASAVqAFGLRTHYGGGRTTGFALIYDDVEAMk	Unambiguous	40S ribosomal protein S24 [Schizosaccharomyces pombe 972h-]	1	1	19115165	Q7(Deamidated); K34(Label:13C(6)15N(2))	HCD	1	0	1	1	7391			1.9222e+07	Heavy	Unique	Used	1.32072e+06	16988475	12.8631	1.27523	0.350759
ELRPLQITSAREVEVGGGkk	Unambiguous	40S ribosomal protein S7 [Schizosaccharomyces pombe 972h-]	1	1	19114589	K19(Label:13C(6)15N(2)); K20(Label:13C(6)15N(2))	HCD	1	0	1	1	6402			1.49868e+07	Heavy	Unique	Used	1.09358e+06	1.43414e+07	13.1142	1.27925	0.355301
LNISYPAnGTQk	Unambiguous	40S ribosomal protein S6 [Schizosaccharomyces pombe 972h-]	2	1	19113745	N8(Deamidated); K12(Label:13C(6)15N(2))	HCD	0.2262	0	1	1	1426		1	1.21854e+07	Heavy	Unique	Used	630930	8421564	13.3479	1.28288	0.359385
kGmSPSQIGVTLRDSHGIPQVRFITGQk	Unambiguous	40S ribosomal protein S13 [Schizosaccharomyces pombe 972h-]	1	1	19114812	K1(Label:13C(6)15N(2)); M3(Oxidation); K28(Label:13C(6)15N(2))	HCD	0.1026	0	1	1	5679			6.31544e+07	Heavy	Unique	Used	2783193	37158806	13.3511	1.28293	0.359441
kGmSPSQIGVTLRDSHGIPQVRFITGQk	Unambiguous	40S ribosomal protein S13 [Schizosaccharomyces pombe 972h-]	1	1	19114812	K1(Label:13C(6)15N(2)); M3(Oxidation); K28(Label:13C(6)15N(2))	HCD	1	0	1	1	5680			3.21298e+08	Heavy	Unique	Used	2.19743e+07	294036804	13.3809	1.28338	0.359952
kADIDmSk	Unambiguous	40S ribosomal protein S18 [Schizosaccharomyces pombe 972h-]	1	1	19113298	K1(Label:13C(6)15N(2)); M6(Oxidation); K8(Label:13C(6)15N(2))	HCD	1	0	1	1	5869			6.53722e+06	Heavy	Unique	Used	458143	6146009	13.4151	1.2839	0.360535
TRIIQVAYHPSNnELVRTNTLTk	Unambiguous	40S ribosomal protein S8 [Schizosaccharomyces pombe 972h-]	2	1	19115431	N13(Deamidated); K23(Label:13C(6)15N(2))	HCD	0.5309	0	1	1	3889		1	44121027	Heavy	Unique	Used	1.02221e+06	13823949	13.5236	1.28554	0.362371
kADIDMSk	Unambiguous	40S ribosomal protein S18 [Schizosaccharomyces pombe 972h-]	1	1	19113298	K1(Label:13C(6)15N(2)); K8(Label:13C(6)15N(2))	HCD	1	0	1	1	399			1.34302e+08	Heavy	Unique	Used	9748772	133049269	13.6478	1.28738	0.364438
kADIDmSk	Unambiguous	40S ribosomal protein S18 [Schizosaccharomyces pombe 972h-]	1	1	19113298	K1(Label:13C(6)15N(2)); M6(Oxidation); K8(Label:13C(6)15N(2))	HCD	1	0	1	1	64		1	3.16611e+07	Heavy	Unique	Used	1.74812e+06	23986500	13.7213	1.28846	0.365646
GkPAGLNAARk	Unambiguous	40S ribosomal protein S23 [Schizosaccharomyces pombe 972h-]	1	1	19112979	K2(Label:13C(6)15N(2)); K11(Label:13C(6)15N(2))	HCD	1	0	1	1	15			1.07542e+09	Heavy	Unique	Used	76749560	1064138040	13.8651	1.29054	0.367973
kGmSPSQIGVTLRDSHGIPQVRFITGQk	Unambiguous	40S ribosomal protein S13 [Schizosaccharomyces pombe 972h-]	1	1	19114812	K1(Label:13C(6)15N(2)); M3(Oxidation); K28(Label:13C(6)15N(2))	HCD	0.2533	0	1	1	5675			6.33523e+08	Heavy	Unique	Used	4.02543e+07	574564248	14.2733	1.29625	0.374346
LFNQVEIRPEMIGHYLGEFSITYkPTk	Unambiguous	40S ribosomal protein S15 [Schizosaccharomyces pombe 972h-]	2	1	19075461	K24(Label:13C(6)15N(2)); K27(Label:13C(6)15N(2))	HCD	0.4917	0	1	1	7204			7.28672e+07	Heavy	Unique	Used	4.49338e+06	64643595	14.3864	1.29779	0.376051
LFNQVEIRPEmIGHYLGEFSITYkPTk	Unambiguous	40S ribosomal protein S15 [Schizosaccharomyces pombe 972h-]	2	1	19075461	M11(Oxidation); K24(Label:13C(6)15N(2)); K27(Label:13C(6)15N(2))	HCD	0.2042	0	1	1	7116			1.26016e+08	Heavy	Unique	Used	7.62497e+06	112647032	14.7734	1.30288	0.381707
AIHQALFQQGVLVAkk	Unambiguous	40S ribosomal protein S10 [Schizosaccharomyces pombe 972h-]	1	1	19112397	K15(Label:13C(6)15N(2)); K16(Label:13C(6)15N(2))	HCD	1	0	1	1	1564		1	1.02581e+07	Heavy	Unique	Used	311928	4.68807e+06	15.0293	1.30613	0.385297
LNISYPANGTQk	Unambiguous	40S ribosomal protein S6 [Schizosaccharomyces pombe 972h-]	2	1	19113745	K12(Label:13C(6)15N(2))	HCD	1	0	1	1	6360			4.79304e+06	Heavy	Unique	Used	282956	4.26428e+06	15.0705	1.30664	0.385865
kGmSPSQIGVTLRDSHGIPQVRFITGQk	Unambiguous	40S ribosomal protein S13 [Schizosaccharomyces pombe 972h-]	1	1	19114812	K1(Label:13C(6)15N(2)); M3(Oxidation); K28(Label:13C(6)15N(2))	HCD	0.1125	0	1	1	7816			7.98091e+07	Heavy	Unique	Used	4.03169e+06	61530078	15.2616	1.309	0.38846
GkPAGLNAARk	Unambiguous	40S ribosomal protein S23 [Schizosaccharomyces pombe 972h-]	1	1	19112979	K2(Label:13C(6)15N(2)); K11(Label:13C(6)15N(2))	HCD	1	0	1	1	59			5.6817e+07	Heavy	Unique	Used	3.64165e+06	5.6817e+07	15.602	1.31306	0.392936
EVSLDETGHIK	Unambiguous	40S ribosomal protein S5 [Schizosaccharomyces pombe 972h-]	1	1	19115124		HCD	1	0	1	1	3282		1	376687	Light	Unique	Used	376687	5892155	15.642	1.31353	0.393451
GkPAGLNAARk	Unambiguous	40S ribosomal protein S23 [Schizosaccharomyces pombe 972h-]	1	1	19112979	K2(Label:13C(6)15N(2)); K11(Label:13C(6)15N(2))	HCD	1	0	1	1	2650			1.65046e+07	Heavy	Unique	Used	972612	1.58911e+07	16.3386	1.32136	0.402027
GkPAGLnAARk	Unambiguous	40S ribosomal protein S23 [Schizosaccharomyces pombe 972h-]	1	1	19112979	K2(Label:13C(6)15N(2)); N7(Deamidated); K11(Label:13C(6)15N(2))	HCD	1	0	1	1	2688		1	3.15089e+07	Heavy	Unique	Used	1.38651e+06	22663896	16.346	1.32144	0.402114
TRIIQVAYHPSNnELVRTNTLTk	Unambiguous	40S ribosomal protein S8 [Schizosaccharomyces pombe 972h-]	2	1	19115431	N13(Deamidated); K23(Label:13C(6)15N(2))	HCD	1	0	1	1	1617		1	1.22106e+07	Heavy	Unique	Used	174297	3.03685e+06	17.4234	1.33247	0.414103
VMFAmTQIk	Unambiguous	40S ribosomal protein S18 [Schizosaccharomyces pombe 972h-]	1	1	19113298	M5(Oxidation); K9(Label:13C(6)15N(2))	HCD	1	0	1	1	1536		1	14964447	Heavy	Unique	Used	599845	10495379	17.4968	1.33318	0.41487
VnGAPLSLVQPEILRMk	Unambiguous	40S ribosomal protein S16 [Schizosaccharomyces pombe 972h-]	1	1	19112530	N2(Deamidated); K17(Label:13C(6)15N(2))	HCD	1	0	1	1	4809			58085539	Heavy	Unique	Used	2.95744e+06	5.21968e+07	17.6494	1.33463	0.416443
GkPAGLNAARk	Unambiguous	40S ribosomal protein S23 [Schizosaccharomyces pombe 972h-]	1	1	19112979	K2(Label:13C(6)15N(2)); K11(Label:13C(6)15N(2))	HCD	1	0	1	1	350		1	3.50576e+07	Heavy	Unique	Used	1.29775e+06	24456406	18.8453	1.34532	0.42795
kFEPHYRLVRVGQAEPIQk	Unambiguous	40S ribosomal protein S24 [Schizosaccharomyces pombe 972h-]	1	1	19112688	K1(Label:13C(6)15N(2)); K19(Label:13C(6)15N(2))	HCD	1	0	1	1	1077			1.6042e+08	Heavy	Unique	Used	5.67589e+06	112032776	19.7384	1.35255	0.435685
kFEPHYRLVRVGHAEPIQk	Unambiguous	40S ribosomal protein S24 [Schizosaccharomyces pombe 972h-]	1	1	19115165	K1(Label:13C(6)15N(2)); K19(Label:13C(6)15N(2))	HCD	1	0	1	1	793			65500283	Heavy	Unique	Used	2614514	60036720	22.9629	1.37445	0.458852
kGmSPSQIGVTLRDSHGIPQVRFITGQk	Unambiguous	40S ribosomal protein S13 [Schizosaccharomyces pombe 972h-]	1	1	19114812	K1(Label:13C(6)15N(2)); M3(Oxidation); K28(Label:13C(6)15N(2))	HCD	0.3893	0	1	1	4207			7.13105e+07	Heavy	Unique	Used	1.53931e+06	38644812	25.1052	1.38617	0.471103
TPAEAIYGEYVDk	Unambiguous	40S ribosomal protein S11 [Schizosaccharomyces pombe 972h-]	1	1	19115584	K13(Label:13C(6)15N(2))	HCD	1	0	1	1	1958	1		150582	Heavy	Unique	Used	3174.94	88006	27.7189	1.39822	0.483591
ELRPLQITSAREVEVGGGkk	Unambiguous	40S ribosomal protein S7 [Schizosaccharomyces pombe 972h-]	1	1	19114589	K19(Label:13C(6)15N(2)); K20(Label:13C(6)15N(2))	HCD	1	0	1	1	1368			9.11088e+07	Heavy	Unique	Used	2.80438e+06	84105340	29.9907	1.40712	0.492746
kFEPHYRLVRVGQAEPIQk	Unambiguous	40S ribosomal protein S24 [Schizosaccharomyces pombe 972h-]	1	1	19112688	K1(Label:13C(6)15N(2)); K19(Label:13C(6)15N(2))	HCD	1	0	1	1	3260		1	5.01276e+08	Heavy	Unique	Used	5.15438e+06	159510096	30.9465	1.4105	0.496211
AIHqALFQQGVLVAk	Unambiguous	40S ribosomal protein S10 [Schizosaccharomyces pombe 972h-]	1	1	19112397	Q4(Deamidated); K15(Label:13C(6)15N(2))	HCD	0.027	0	1	1	4230		1	3.86756e+07	Heavy	Unique	Used	577124	20406564	35.3591	1.42391	0.50986
RIVDEVAIIASk	Unambiguous	40S ribosomal protein S17 [Schizosaccharomyces pombe 972h-]	2	2	19075512;19112037	K12(Label:13C(6)15N(2))	HCD	1	0	1	1	3754			2.32517e+07	Heavy	Not Unique	Used	526981	2.16793e+07	41.1387	1.43737	0.523436
QmVVDILHPGK	Unambiguous	40S ribosomal protein S24 [Schizosaccharomyces pombe 972h-]	2	2	19112688;19115165	M2(Oxidation)	HCD	1	0	1	1	3682		1	240624	Light	Not Unique	Used	240624	11123385	46.2272	1.44658	0.532651
EWVPVTk	Unambiguous	40S ribosomal protein S2 [Schizosaccharomyces pombe 972h-]	1	1	19075935	K7(Label:13C(6)15N(2))	HCD	1	0	1	1	6507	1		253217	Heavy	Unique	Used	3174.94	156724	49.3628	1.45136	0.537406
LFNQVEIRPEmIGHYLGEFSITYkPTk	Unambiguous	40S ribosomal protein S15 [Schizosaccharomyces pombe 972h-]	2	1	19075461	M11(Oxidation); K24(Label:13C(6)15N(2)); K27(Label:13C(6)15N(2))	HCD	0.2022	0	1	1	4815		1	1.1208e+08	Heavy	Unique	Used	400795	21509304	53.6666	1.45705	0.543049
SSPFGGSSHAk	Unambiguous	40S ribosomal protein S23 [Schizosaccharomyces pombe 972h-]	1	1	19112979	K11(Label:13C(6)15N(2))	HCD	1	0	1	1	6170	1		227175	Heavy	Unique	Used	3174.94	171212	53.9262	1.45736	0.543361
AIHqALFSQGVLVAk	Unambiguous	40S ribosomal protein S10 [Schizosaccharomyces pombe 972h-]	1	1	19114930	Q4(Deamidated); K15(Label:13C(6)15N(2))	HCD	0.449	0	1	1	1908	1		412590	Heavy	Unique	Used	3174.94	189565	59.7066	1.4637	0.549623
ImLPEPk	Unambiguous	40S ribosomal protein S3 [Schizosaccharomyces pombe 972h-]	1	1	19113555	M2(Oxidation); K7(Label:13C(6)15N(2))	HCD	1	0	1	1	1212	1		225344	Heavy	Unique	Used	3174.94	190991	60.1557	1.46415	0.55006
AFVVIGDSDGHVGLGIk	Unambiguous	40S ribosomal protein S2 [Schizosaccharomyces pombe 972h-]	1	1	19075935	K17(Label:13C(6)15N(2))	HCD	1	0	1	1	5242	1		359988	Heavy	Unique	Used	3174.94	230641	72.6442	1.47436	0.560089
TDASAVqAFGLRTHYGGGRTTGFALIYDDVEAMk	Unambiguous	40S ribosomal protein S24 [Schizosaccharomyces pombe 972h-]	1	1	19115165	Q7(Deamidated); K34(Label:13C(6)15N(2))	HCD	1	0	1	1	2626	1		873826	Heavy	Unique	Used	3174.94	284241	89.5265	1.48376	0.569258
GkPAGLNAARk	Unambiguous	40S ribosomal protein S23 [Schizosaccharomyces pombe 972h-]	1	1	19112979	K2(Label:13C(6)15N(2)); K11(Label:13C(6)15N(2))	HCD	1	0	1	1	149		1	169115920	Heavy	Unique	Used	1.0795e+06	118380648	109.662	1.49127	0.576545
DQYVPEVSELEVDRVNVDQDTk	Unambiguous	40S ribosomal protein S17 [Schizosaccharomyces pombe 972h-]	1	1	19112037	K22(Label:13C(6)15N(2))	HCD	1	0	1	1	5197	1		678149	Heavy	Unique	Used	3174.94	374893	118.079	1.49367	0.578862
TDASAVQAFGLRTHYGGGRTTGFALIYDDVEAMk	Unambiguous	40S ribosomal protein S24 [Schizosaccharomyces pombe 972h-]	1	1	19115165	K34(Label:13C(6)15N(2))	HCD	1	0	1	1	5205	1		2.17416e+06	Heavy	Unique	Used	3174.94	375239	118.188	1.4937	0.57889
SFQLLANnVDSk	Unambiguous	40S ribosomal protein S18 [Schizosaccharomyces pombe 972h-]	1	1	19113298	N8(Deamidated); K12(Label:13C(6)15N(2))	HCD	1	0	1	1	2128	1		461882	Heavy	Unique	Used	3174.94	379883	119.65	1.49408	0.579259
WQTTIEADQTIk	Unambiguous	40S ribosomal protein S1 [Schizosaccharomyces pombe 972h-]	1	1	19114028	K12(Label:13C(6)15N(2))	HCD	1	0	1	1	1736	1		557480	Heavy	Unique	Used	3174.94	390734	123.068	1.49494	0.580087
ANGLAPELPEDLYNLIk	Unambiguous	40S ribosomal protein S13 [Schizosaccharomyces pombe 972h-]	1	1	19114812	K17(Label:13C(6)15N(2))	HCD	1	0	1	1	7500	1		621434	Heavy	Unique	Used	3174.94	416444	131.166	1.4968	0.581879
AFVVIGDSDGHVGLGIk	Unambiguous	40S ribosomal protein S2 [Schizosaccharomyces pombe 972h-]	1	1	19075935	K17(Label:13C(6)15N(2))	HCD	1	0	1	1	5216	1		1.00952e+06	Heavy	Unique	Used	3174.94	446672	140.687	1.49871	0.583725
WQTTIEADQTIk	Unambiguous	40S ribosomal protein S1 [Schizosaccharomyces pombe 972h-]	1	1	19114028	K12(Label:13C(6)15N(2))	HCD	1	0	1	1	4135	1		687878	Heavy	Unique	Used	3174.94	450472	141.884	1.49894	0.58394
FPFEGVEVk	Unambiguous	40S ribosomal protein S5 [Schizosaccharomyces pombe 972h-]	2	1	19115124	K9(Label:13C(6)15N(2))	HCD	1	0	1	1	2136	1		642605	Heavy	Unique	Used	3174.94	466948	147.073	1.49986	0.58483
VGALPPTWk	Unambiguous	40S ribosomal protein S13 [Schizosaccharomyces pombe 972h-]	1	1	19114812	K9(Label:13C(6)15N(2))	HCD	1	0	1	1	6853	1		611084	Heavy	Unique	Used	3174.94	486099	153.105	1.50086	0.58579
TRYNWGWFYYTLTNEGVEYLREYLHLPAEVVPATHk	Unambiguous	40S ribosomal protein S10 [Schizosaccharomyces pombe 972h-]	2	2	19114930;19112397	K36(Label:13C(6)15N(2))	HCD	1	0	1	1	8036	1		5.46147e+06	Heavy	Not Unique	Used	3174.94	501748	158.034	1.50162	0.58652
TGEHFRLVYDIk	Unambiguous	40S ribosomal protein S4 [Schizosaccharomyces pombe 972h-]	3	2	19112469;19113142	K12(Label:13C(6)15N(2))	HCD	1	0	1	1	4128	1		1.07581e+06	Heavy	Not Unique	Used	3174.94	515408	162.336	1.50225	0.587122
TDASAVQAFGLRTHYGGGRTTGFALIYDDVEAmk	Unambiguous	40S ribosomal protein S24 [Schizosaccharomyces pombe 972h-]	1	1	19115165	M33(Oxidation); K34(Label:13C(6)15N(2))	HCD	1	0	1	1	2109	1		2.07975e+06	Heavy	Unique	Used	3174.94	571483	179.998	1.50451	0.589292
DqYVPEVSELEVDRVNVDQDTk	Unambiguous	40S ribosomal protein S17 [Schizosaccharomyces pombe 972h-]	1	1	19112037	Q2(Deamidated); K22(Label:13C(6)15N(2))	HCD	1	0	1	1	7504	1		813430	Heavy	Unique	Used	3174.94	605880	190.832	1.50569	0.590426
AIHQALFSQGVLVAk	Unambiguous	40S ribosomal protein S10 [Schizosaccharomyces pombe 972h-]	1	1	19114930	K15(Label:13C(6)15N(2))	HCD	1	0	1	1	7059	1		1.08958e+06	Heavy	Unique	Used	3174.94	613576	193.256	1.50594	0.590662
VAGVGLSALFHEk	Unambiguous	40S ribosomal protein S23 [Schizosaccharomyces pombe 972h-]	1	1	19112979	K13(Label:13C(6)15N(2))	HCD	1	0	1	1	2141	1		896802	Heavy	Unique	Used	3174.94	644474	202.988	1.50687	0.591555
RIVDEVAIIASk	Unambiguous	40S ribosomal protein S17 [Schizosaccharomyces pombe 972h-]	2	2	19075512;19112037	K12(Label:13C(6)15N(2))	HCD	1	0	1	1	7056	1		1.02047e+06	Heavy	Not Unique	Used	3174.94	672975	211.965	1.50765	0.592306
TPAEAIYGEYVDk	Unambiguous	40S ribosomal protein S11 [Schizosaccharomyces pombe 972h-]	1	1	19115584	K13(Label:13C(6)15N(2))	HCD	1	0	1	1	7066	1		1.30468e+06	Heavy	Unique	Used	3174.94	808938	254.789	1.51064	0.595164
kADIDmSk	Unambiguous	40S ribosomal protein S18 [Schizosaccharomyces pombe 972h-]	1	1	19113298	K1(Label:13C(6)15N(2)); M6(Oxidation); K8(Label:13C(6)15N(2))	HCD	1	0	1	1	5890	1		1.04484e+06	Heavy	Unique	Used	3174.94	863572	271.996	1.51158	0.59606
VYEPILVAGADk	Unambiguous	40S ribosomal protein S16 [Schizosaccharomyces pombe 972h-]	1	1	19112530	K12(Label:13C(6)15N(2))	HCD	1	0	1	1	7057	1		1.40507e+06	Heavy	Unique	Used	3174.94	905777	285.29	1.51223	0.596679
TDASAVQAFGLRTHYGGGRTTGFALIYDDVEAmk	Unambiguous	40S ribosomal protein S24 [Schizosaccharomyces pombe 972h-]	1	1	19115165	M33(Oxidation); K34(Label:13C(6)15N(2))	HCD	1	0	1	1	5850	1		5.39039e+06	Heavy	Unique	Used	3174.94	910176	286.675	1.5123	0.59674
AIVAYYQk	Unambiguous	40S ribosomal protein S16 [Schizosaccharomyces pombe 972h-]	1	1	19112530	K8(Label:13C(6)15N(2))	HCD	1	0	1	1	6407	1		1.11508e+06	Heavy	Unique	Used	3174.94	920396	289.894	1.51244	0.59688
ELRPLQITSAREVEVGGGk	Unambiguous	40S ribosomal protein S7 [Schizosaccharomyces pombe 972h-]	1	1	19114589	K19(Label:13C(6)15N(2))	HCD	1	0	1	1	3932	1		2.94808e+06	Heavy	Unique	Used	3174.94	1.05208e+06	331.37	1.51408	0.59844
TDASAVQAFGLRTHYGGGRTTGFALIYDDVEAMkk	Unambiguous	40S ribosomal protein S24 [Schizosaccharomyces pombe 972h-]	1	1	19115165	K34(Label:13C(6)15N(2)); K35(Label:13C(6)15N(2))	HCD	1	0	1	1	7016	1		1.57611e+07	Heavy	Unique	Used	3174.94	1.41777e+06	446.551	1.51704	0.601258
ADADSVVEqILk	Unambiguous	40S ribosomal protein S13 [Schizosaccharomyces pombe 972h-]	1	1	19114812	Q9(Deamidated); K12(Label:13C(6)15N(2))	HCD	1	0	1	1	5028	1		2.20052e+06	Heavy	Unique	Used	3174.94	1.50344e+06	473.533	1.51753	0.60172
LLELHGESQDVGSk	Unambiguous	40S ribosomal protein S1 [Schizosaccharomyces pombe 972h-]	1	1	19113740	K14(Label:13C(6)15N(2))	HCD	1	0	1	1	1026	1		2.84548e+06	Heavy	Unique	Used	3174.94	1.60839e+06	506.589	1.51805	0.60222
IQTHRGLRHALDLRVRGQHTk	Unambiguous	40S ribosomal protein S18 [Schizosaccharomyces pombe 972h-]	1	1	19113298	K21(Label:13C(6)15N(2))	HCD	1	0	1	1	2763	1		2.45291e+06	Heavy	Unique	Used	3174.94	1.61601e+06	508.99	1.51809	0.602254
ADADSVVEQILk	Unambiguous	40S ribosomal protein S13 [Schizosaccharomyces pombe 972h-]	1	1	19114812	K12(Label:13C(6)15N(2))	HCD	1	0	1	1	5033	1		2.46065e+06	Heavy	Unique	Used	3174.94	1.68097e+06	529.449	1.51838	0.602529
DALDREFATRLSNVFVIGETGk	Unambiguous	40S ribosomal protein S4 [Schizosaccharomyces pombe 972h-]	2	1	19113142	K22(Label:13C(6)15N(2))	HCD	1	0	1	1	4931	1		5.02768e+06	Heavy	Unique	Used	3174.94	1.88568e+06	593.927	1.51916	0.603273
kADIDmSk	Unambiguous	40S ribosomal protein S18 [Schizosaccharomyces pombe 972h-]	1	1	19113298	K1(Label:13C(6)15N(2)); M6(Oxidation); K8(Label:13C(6)15N(2))	HCD	1	0	1	1	2798	1		2.24983e+06	Heavy	Unique	Used	3174.94	1.97946e+06	623.465	1.51946	0.603562
SWISLPk	Unambiguous	40S ribosomal protein S4 [Schizosaccharomyces pombe 972h-]	3	2	19112469;19113142	K7(Label:13C(6)15N(2))	HCD	1	0	1	1	2138	1		2.67806e+06	Heavy	Not Unique	Used	3174.94	2.05876e+06	648.44	1.5197	0.603786
SFQLLAnNVDSk	Unambiguous	40S ribosomal protein S18 [Schizosaccharomyces pombe 972h-]	1	1	19113298	N7(Deamidated); K12(Label:13C(6)15N(2))	HCD	0.2419	0	1	1	1957	1		3.68918e+06	Heavy	Unique	Used	3174.94	2.25155e+06	709.164	1.5202	0.604266
LLELHGESQDVGTk	Unambiguous	40S ribosomal protein S1 [Schizosaccharomyces pombe 972h-]	1	1	19114028	K14(Label:13C(6)15N(2))	HCD	1	0	1	1	1153	1		3.77435e+06	Heavy	Unique	Used	3174.94	2536589	798.941	1.52081	0.604841
DELERVAk	Unambiguous	40S ribosomal protein S5 [Schizosaccharomyces pombe 972h-]	2	1	19115124	K8(Label:13C(6)15N(2))	HCD	1	0	1	1	3007	1		3.52227e+06	Heavy	Unique	Used	3174.94	2.58814e+06	815.177	1.52091	0.604932
THLRNMIILPEMVGSVVGIYNGk	Unambiguous	40S ribosomal protein S15 [Schizosaccharomyces pombe 972h-]	2	1	19075461	K23(Label:13C(6)15N(2))	HCD	1	0	1	1	4972	1		1.37543e+07	Heavy	Unique	Used	3174.94	2.76045e+06	869.45	1.5212	0.60521
VPRRPFESARLDAELk	Unambiguous	40S ribosomal protein S9 [Schizosaccharomyces pombe 972h-]	2	2	19112632;19113857	K16(Label:13C(6)15N(2))	HCD	1	0	1	1	1264	1		6.41005e+06	Heavy	Not Unique	Used	3174.94	2.8073e+06	884.205	1.52127	0.60528
SLVVPDNFQHILRLLNTNVDGk	Unambiguous	40S ribosomal protein S18 [Schizosaccharomyces pombe 972h-]	1	1	19113298	K22(Label:13C(6)15N(2))	HCD	1	0	1	1	7344	1		1.24054e+07	Heavy	Unique	Used	3174.94	2.81502e+06	886.637	1.52129	0.605291
FAGVDIRVRVSGGGHVSQIYAIRQAISk	Unambiguous	40S ribosomal protein S16 [Schizosaccharomyces pombe 972h-]	1	1	19112530	K28(Label:13C(6)15N(2))	HCD	1	0	1	1	5139	1		5.76983e+06	Heavy	Unique	Used	3174.94	2.88879e+06	909.871	1.5214	0.605395
RASRVVIEk	Unambiguous	40S ribosomal protein S17 [Schizosaccharomyces pombe 972h-]	2	2	19075512;19112037	K9(Label:13C(6)15N(2))	HCD	1	0	1	1	2810	1		3.96168e+06	Heavy	Not Unique	Used	3174.94	2.89344e+06	911.336	1.5214	0.605402
VDELTVDFVGVGk	Unambiguous	40S ribosomal protein cpc2/RACK1 [Schizosaccharomyces pombe 972h-]	1	1	19114682	K13(Label:13C(6)15N(2))	HCD	1	0	1	1	4792	1		4.84301e+06	Heavy	Unique	Used	3174.94	3.0403e+06	957.591	1.52161	0.605594
FMTNRLLQRk	Unambiguous	40S ribosomal protein S24 [Schizosaccharomyces pombe 972h-]	2	2	19112688;19115165	K10(Label:13C(6)15N(2))	HCD	1	0	1	1	1015	1		3.61503e+06	Heavy	Not Unique	Used	3174.94	3.11045e+06	979.687	1.5217	0.60568
EYQIVDYFLPRLnDEVmk	Unambiguous	40S ribosomal protein S2 [Schizosaccharomyces pombe 972h-]	1	1	19075935	N13(Deamidated); M17(Oxidation); K18(Label:13C(6)15N(2))	HCD	1	0	1	1	7336	1		1.01721e+07	Heavy	Unique	Used	3174.94	3.12778e+06	985.147	1.52172	0.605701
TDASAVQAFGLRTHYGGGRTTGFALIYDDVEAmk	Unambiguous	40S ribosomal protein S24 [Schizosaccharomyces pombe 972h-]	1	1	19115165	M33(Oxidation); K34(Label:13C(6)15N(2))	HCD	1	0	1	1	7433	1		6.3963e+06	Heavy	Unique	Used	3174.94	3.24812e+06	1023.05	1.52186	0.605837
SAIVQIDAAPFRVWYETHYGILMGSk	Unambiguous	40S ribosomal protein S8 [Schizosaccharomyces pombe 972h-]	2	1	19115431	K26(Label:13C(6)15N(2))	HCD	1	0	1	1	5011	1		2.23666e+07	Heavy	Unique	Used	3174.94	3412749	1074.9	1.52204	0.606009
RVVDPFSRk	Unambiguous	40S ribosomal protein S1 [Schizosaccharomyces pombe 972h-]	2	2	19114028;19113740	K9(Label:13C(6)15N(2))	HCD	1	0	1	1	717	1		4.93897e+06	Heavy	Not Unique	Used	3174.94	3.41641e+06	1076.05	1.52205	0.606012
MTTPQWIDIVk	Unambiguous	40S ribosomal protein S19 [Schizosaccharomyces pombe 972h-]	2	2	19113385;19112013	K11(Label:13C(6)15N(2))	HCD	1	0	1	1	7306	1		4.07979e+06	Heavy	Not Unique	Used	3174.94	3.50956e+06	1105.39	1.52214	0.606102
VAGVGLSALFHEk	Unambiguous	40S ribosomal protein S23 [Schizosaccharomyces pombe 972h-]	1	1	19112979	K13(Label:13C(6)15N(2))	HCD	1	0	1	1	7070	1		6.15229e+06	Heavy	Unique	Used	3174.94	3.53985e+06	1114.93	1.52217	0.60613
ANGLAPELPEDLYNLIk	Unambiguous	40S ribosomal protein S13 [Schizosaccharomyces pombe 972h-]	1	1	19114812	K17(Label:13C(6)15N(2))	HCD	1	0	1	1	5096	1		7.2833e+06	Heavy	Unique	Used	3174.94	3643888	1147.7	1.52227	0.606223
RVVDPFSRk	Unambiguous	40S ribosomal protein S1 [Schizosaccharomyces pombe 972h-]	2	2	19114028;19113740	K9(Label:13C(6)15N(2))	HCD	1	0	1	1	3130	1		4.87953e+06	Heavy	Not Unique	Used	3174.94	3.65292e+06	1150.55	1.52228	0.606231
WQSTIEANQTIk	Unambiguous	40S ribosomal protein S1 [Schizosaccharomyces pombe 972h-]	1	1	19113740	K12(Label:13C(6)15N(2))	HCD	1	0	1	1	3679	1		5.82783e+06	Heavy	Unique	Used	3174.94	3.76724e+06	1186.56	1.52238	0.606327
IRRFFNLSk	Unambiguous	40S ribosomal protein S6 [Schizosaccharomyces pombe 972h-]	2	1	19113745	K9(Label:13C(6)15N(2))	HCD	1	0	1	1	3431	1		5.31742e+06	Heavy	Unique	Used	3174.94	3.94688e+06	1243.13	1.52253	0.606466
FADGFmIHSGQPAVDFIDSATRHVLLRQGVLGVk	Unambiguous	40S ribosomal protein S3 [Schizosaccharomyces pombe 972h-]	1	1	19113555	M6(Oxidation); K34(Label:13C(6)15N(2))	HCD	0.7131	0	1	1	7960	1		2.82609e+07	Heavy	Unique	Used	3174.94	4418323	1391.62	1.52286	0.606779
DALDREFATRLSNVFVIGETGk	Unambiguous	40S ribosomal protein S4 [Schizosaccharomyces pombe 972h-]	2	1	19113142	K22(Label:13C(6)15N(2))	HCD	1	0	1	1	7207	1		1.34142e+07	Heavy	Unique	Used	3174.94	4.56209e+06	1436.91	1.52294	0.606861
LRnHRREERWADAHYk	Unambiguous	40S ribosomal protein S23 [Schizosaccharomyces pombe 972h-]	1	1	19112979	N3(Deamidated); K16(Label:13C(6)15N(2))	HCD	1	0	1	1	2761	1		12348122	Heavy	Unique	Used	3174.94	4.7155e+06	1485.23	1.52303	0.606943
ELAPYDPDWYYVRAAAIARHIYLRk	Unambiguous	40S ribosomal protein S19 [Schizosaccharomyces pombe 972h-]	2	2	19113385;19112013	K25(Label:13C(6)15N(2))	HCD	1	0	1	1	7950	1		2.7185e+07	Heavy	Not Unique	Used	3174.94	4.75654e+06	1498.15	1.52305	0.606964
VGALPPTWk	Unambiguous	40S ribosomal protein S13 [Schizosaccharomyces pombe 972h-]	1	1	19114812	K9(Label:13C(6)15N(2))	HCD	1	0	1	1	1910	1		6.53377e+06	Heavy	Unique	Used	3174.94	4772117	1503.06	1.52306	0.606972
TDASAVQAFGLRTHYGGGRTTGFALIYDDVEAMk	Unambiguous	40S ribosomal protein S24 [Schizosaccharomyces pombe 972h-]	1	1	19115165	K34(Label:13C(6)15N(2))	HCD	1	0	1	1	8021	1		9.88504e+06	Heavy	Unique	Used	3174.94	5.25355e+06	1654.69	1.52329	0.607194
ImLPEPk	Unambiguous	40S ribosomal protein S3 [Schizosaccharomyces pombe 972h-]	1	1	19113555	M2(Oxidation); K7(Label:13C(6)15N(2))	HCD	1	0	1	1	3536	1		5.96067e+06	Heavy	Unique	Used	3174.94	5436390	1712.28	1.52337	0.607268
ADADSVVEQILkFSk	Unambiguous	40S ribosomal protein S13 [Schizosaccharomyces pombe 972h-]	1	1	19114812	K12(Label:13C(6)15N(2)); K15(Label:13C(6)15N(2))	HCD	1	0	1	1	5006	1		10534922	Heavy	Unique	Used	3174.94	5.51853e+06	1738.15	1.52341	0.6073
FMTNRLLQRk	Unambiguous	40S ribosomal protein S24 [Schizosaccharomyces pombe 972h-]	2	2	19112688;19115165	K10(Label:13C(6)15N(2))	HCD	1	0	1	1	3276	1		9.3006e+06	Heavy	Not Unique	Used	3174.94	6054799	1907.06	1.5236	0.607485
AQVGRPNILNATDEDIk	Unambiguous	40S ribosomal protein S0A [Schizosaccharomyces pombe 972h-]	1	1	19112932	K17(Label:13C(6)15N(2))	HCD	1	0	1	1	3891	1		1.27522e+07	Heavy	Unique	Used	3174.94	6.18981e+06	1949.58	1.52364	0.607527
kDELERVAk	Unambiguous	40S ribosomal protein S5 [Schizosaccharomyces pombe 972h-]	2	1	19115124	K1(Label:13C(6)15N(2)); K9(Label:13C(6)15N(2))	HCD	1	0	1	1	403	1		8.8991e+06	Heavy	Unique	Used	3174.94	6.52996e+06	2056.72	1.52375	0.607624
LFNQVEIRPEMIGHYLGEFSITYkPTk	Unambiguous	40S ribosomal protein S15 [Schizosaccharomyces pombe 972h-]	2	1	19075461	K24(Label:13C(6)15N(2)); K27(Label:13C(6)15N(2))	HCD	0.4973	0	1	1	4946	1		3.39104e+07	Heavy	Unique	Used	3174.94	6.72209e+06	2117.23	1.5238	0.607675
RWTIRNmVETAAIRDLSEASVYSEYTIPk	Unambiguous	40S ribosomal protein S26 [Schizosaccharomyces pombe 972h-]	1	1	19114834	M7(Oxidation); K29(Label:13C(6)15N(2))	HCD	1	0	1	1	7924	1		4.28284e+07	Heavy	Unique	Used	3174.94	6923286	2180.6	1.52385	0.607725
YYPRLTLDFQTNk	Unambiguous	40S ribosomal protein S17 [Schizosaccharomyces pombe 972h-]	2	2	19075512;19112037	K13(Label:13C(6)15N(2))	HCD	1	0	1	1	4582	1		2.07859e+07	Heavy	Not Unique	Used	3174.94	8164329	2571.49	1.52412	0.607978
TDASAVQAFGLRTHYGGGRTTGFALIYDDVEAmk	Unambiguous	40S ribosomal protein S24 [Schizosaccharomyces pombe 972h-]	1	1	19115165	M33(Oxidation); K34(Label:13C(6)15N(2))	HCD	1	0	1	1	8022	1		5.16354e+07	Heavy	Unique	Used	3174.94	8447652	2660.73	1.52417	0.608026
kFEPHYRLVRVGQAEPIqk	Unambiguous	40S ribosomal protein S24 [Schizosaccharomyces pombe 972h-]	1	1	19112688	K1(Label:13C(6)15N(2)); Q18(Deamidated); K19(Label:13C(6)15N(2))	HCD	1	0	1	1	5477	1		2.33179e+07	Heavy	Unique	Used	3174.94	8774931	2763.81	1.52423	0.608077
AILmQRLIQVDGk	Unambiguous	40S ribosomal protein S4 [Schizosaccharomyces pombe 972h-]	1	1	19112469	M4(Oxidation); K13(Label:13C(6)15N(2))	HCD	1	0	1	1	1658	1		1.46547e+07	Heavy	Unique	Used	3174.94	9144767	2880.3	1.52428	0.60813
TDASAVqAFGLRTHYGGGRTTGFALIYDDVEAMk	Unambiguous	40S ribosomal protein S24 [Schizosaccharomyces pombe 972h-]	1	1	19115165	Q7(Deamidated); K34(Label:13C(6)15N(2))	HCD	1	0	1	1	7999	1		18273262	Heavy	Unique	Used	3174.94	9356410	2946.96	1.52431	0.608159
IPSWFLNRQk	Unambiguous	40S ribosomal protein S18 [Schizosaccharomyces pombe 972h-]	1	1	19113298	K10(Label:13C(6)15N(2))	HCD	1	0	1	1	4363	1		1.65044e+07	Heavy	Unique	Used	3174.94	9747391	3070.1	1.52436	0.608208
kADIDmSk	Unambiguous	40S ribosomal protein S18 [Schizosaccharomyces pombe 972h-]	1	1	19113298	K1(Label:13C(6)15N(2)); M6(Oxidation); K8(Label:13C(6)15N(2))	HCD	1	0	1	1	349	1		1.22665e+07	Heavy	Unique	Used	3174.94	9869175	3108.46	1.52438	0.608223
GmSPSQIGVTLRDSHGIPQVRFITGQk	Unambiguous	40S ribosomal protein S13 [Schizosaccharomyces pombe 972h-]	1	1	19114812	M2(Oxidation); K27(Label:13C(6)15N(2))	HCD	1	0	1	1	5717	1		4.74441e+07	Heavy	Unique	Used	3174.94	10715477	3375.02	1.52448	0.608315
QmVVDILHPGk	Unambiguous	40S ribosomal protein S24 [Schizosaccharomyces pombe 972h-]	2	2	19112688;19115165	M2(Oxidation); K11(Label:13C(6)15N(2))	HCD	1	0	1	1	1552	1		1.98672e+07	Heavy	Not Unique	Used	3174.94	10920456	3439.58	1.5245	0.608336
VYGGSVNRGmRPSHHRDGSGSVQRk	Unambiguous	40S ribosomal protein S19 [Schizosaccharomyces pombe 972h-]	2	2	19113385;19112013	M10(Oxidation); K25(Label:13C(6)15N(2))	HCD	1	0	1	1	2284	1		3.37024e+07	Heavy	Not Unique	Used	3174.94	11979213	3773.05	1.5246	0.608429
IRRFFNLSk	Unambiguous	40S ribosomal protein S6 [Schizosaccharomyces pombe 972h-]	2	1	19113745	K9(Label:13C(6)15N(2))	HCD	1	0	1	1	6335	1		2.92691e+07	Heavy	Unique	Used	3174.94	16317442	5139.45	1.52487	0.608686
ELRPLQITSAREVEVGGGk	Unambiguous	40S ribosomal protein S7 [Schizosaccharomyces pombe 972h-]	1	1	19114589	K19(Label:13C(6)15N(2))	HCD	1	0	1	1	5617	1		3.4183e+08	Heavy	Unique	Used	3174.94	132066464	41596.5	1.52553	0.609307
IRRFFNLSk	Unambiguous	40S ribosomal protein S6 [Schizosaccharomyces pombe 972h-]	2	1	19113745	K9(Label:13C(6)15N(2))	HCD	1	0	1	1	1221	1		2.9826e+08	Heavy	Unique	Used	3174.94	169321392	53330.6	1.52555	0.609326
VGALPPTWk	Unambiguous	40S ribosomal protein S13 [Schizosaccharomyces pombe 972h-]	1	1	19114812	K9(Label:13C(6)15N(2))	HCD	1	0	1	1	4009	1		287481424	Heavy	Unique	Used	3174.94	220304992	69388.7	1.52556	0.609342
VGALPPTWk	Unambiguous	40S ribosomal protein S13 [Schizosaccharomyces pombe 972h-]	1	1	19114812	K9(Label:13C(6)15N(2))	HCD	1	0	1	1	1659	1		330759656	Heavy	Unique	Used	3174.94	274028576	86309.8	1.52557	0.609352
																				median	4.80504
																			labeling efficiency (e)		0.827736

## Sheet: WT(H)-ofd1Δ(L)
Sequence	PSM Ambiguity	Protein Descriptions	# Proteins	# Protein Groups	Protein Group Accessions	Modifications	Activation Type	ΔScore	ΔCn	Rank	Search Engine Rank	QuanResultID	# Missing Channels	# Single-Peak Channels	Precursor Area	Quan Channel	Quan Info	Quan Usage	Light	Heavy	H/L (rk)	rak
CVRVQLIK	Unambiguous	40S ribosomal protein S23 [Schizosaccharomyces pombe 972h-]	1	1	19112979		HCD	1	0	1	1	3084	1		4.46601e+07	Light	Unique	Used	32512758	17297.2	0.000532011	0.000642802
CVRVQLIK	Unambiguous	40S ribosomal protein S23 [Schizosaccharomyces pombe 972h-]	1	1	19112979		HCD	1	0	1	1	4989		1	2.06988e+06	Light	Unique	Used	1.37032e+06	943134	0.688256	0.970504
GDIPGVRFK	Unambiguous	40S ribosomal protein S23 [Schizosaccharomyces pombe 972h-]	1	1	19112979		HCD	1	0	1	1	983			619325360	Light	Unique	Used	619325360	3.79361e+08	0.61254	0.848138
GDIPGVRFK	Unambiguous	40S ribosomal protein S23 [Schizosaccharomyces pombe 972h-]	1	1	19112979		HCD	1	0	1	1	2987			797079452	Light	Unique	Used	797079452	494107582	0.619898	0.859835
GDIPGVRFK	Unambiguous	40S ribosomal protein S23 [Schizosaccharomyces pombe 972h-]	1	1	19112979		HCD	1	0	1	1	4866			1.55141e+08	Light	Unique	Used	1.55141e+08	97530931	0.628661	0.87382
GDIPGVRFk	Unambiguous	40S ribosomal protein S23 [Schizosaccharomyces pombe 972h-]	1	1	19112979	K9(Label:13C(6)15N(2))	HCD	1	0	1	1	946			3159745569	Heavy	Unique	Used	4.96375e+09	3159745569	0.636564	0.886482
GDIPGVRFk	Unambiguous	40S ribosomal protein S23 [Schizosaccharomyces pombe 972h-]	1	1	19112979	K9(Label:13C(6)15N(2))	HCD	1	0	1	1	2866			4153643895	Heavy	Unique	Used	6482056830	4153643895	0.640791	0.893275
GkPAGLNAARk	Unambiguous	40S ribosomal protein S23 [Schizosaccharomyces pombe 972h-]	1	1	19112979	K2(Label:13C(6)15N(2)); K11(Label:13C(6)15N(2))	HCD	1	0	1	1	316			1.38151e+08	Heavy	Unique	Used	2.61564e+08	1.38151e+08	0.528175	0.716899
GkPAGLNAARk	Unambiguous	40S ribosomal protein S23 [Schizosaccharomyces pombe 972h-]	1	1	19112979	K2(Label:13C(6)15N(2)); K11(Label:13C(6)15N(2))	HCD	1	0	1	1	4558			1.24949e+07	Heavy	Unique	Used	2.31975e+07	1.24949e+07	0.538633	0.732885
GKPAGLnAARK	Unambiguous	40S ribosomal protein S23 [Schizosaccharomyces pombe 972h-]	1	1	19112979	N7(Deamidated)	HCD	1	0	1	1	207			1.03445e+08	Light	Unique	Used	102686721	5.57294e+07	0.542713	0.739144
GkPAGLNAARk	Unambiguous	40S ribosomal protein S23 [Schizosaccharomyces pombe 972h-]	1	1	19112979	K2(Label:13C(6)15N(2)); K11(Label:13C(6)15N(2))	HCD	1	0	1	1	2455			5.53885e+07	Heavy	Unique	Used	100478409	5.53885e+07	0.551248	0.752274
GKPAGLnAARK	Unambiguous	40S ribosomal protein S23 [Schizosaccharomyces pombe 972h-]	1	1	19112979	N7(Deamidated)	HCD	1	0	1	1	328		1	1.22779e+07	Light	Unique	Used	8.14297e+06	4538528	0.557355	0.761702
GkPAGLNAARk	Unambiguous	40S ribosomal protein S23 [Schizosaccharomyces pombe 972h-]	1	1	19112979	K2(Label:13C(6)15N(2)); K11(Label:13C(6)15N(2))	HCD	1	0	1	1	184			623699558	Heavy	Unique	Used	1103045908	623699558	0.565434	0.774215
GkPAGLNAARk	Unambiguous	40S ribosomal protein S23 [Schizosaccharomyces pombe 972h-]	1	1	19112979	K2(Label:13C(6)15N(2)); K11(Label:13C(6)15N(2))	HCD	1	0	1	1	187			826794222	Heavy	Unique	Used	1391755470	826794222	0.594066	0.81895
GKPAGLnAARK	Unambiguous	40S ribosomal protein S23 [Schizosaccharomyces pombe 972h-]	1	1	19112979	N7(Deamidated)	HCD	1	0	1	1	206		1	35320784	Light	Unique	Used	35320784	29975496	0.848665	1.24521
LRNHRREERWADAHYk	Unambiguous	40S ribosomal protein S23 [Schizosaccharomyces pombe 972h-]	1	1	19112979	K16(Label:13C(6)15N(2))	HCD	1	0	1	1	283			1.20447e+08	Heavy	Unique	Used	2.00946e+08	1.20447e+08	0.599399	0.827349
LRNHRREERWADAHYK	Unambiguous	40S ribosomal protein S23 [Schizosaccharomyces pombe 972h-]	1	1	19112979		HCD	1	0	1	1	1998			1.40565e+08	Light	Unique	Used	1.40565e+08	8.54589e+07	0.607967	0.840889
LRNHRREERWADAHYk	Unambiguous	40S ribosomal protein S23 [Schizosaccharomyces pombe 972h-]	1	1	19112979	K16(Label:13C(6)15N(2))	HCD	1	0	1	1	2000			1.12843e+09	Heavy	Unique	Used	1808848330	1.12843e+09	0.623839	0.866117
LRNHRREERWADAHYK	Unambiguous	40S ribosomal protein S23 [Schizosaccharomyces pombe 972h-]	1	1	19112979		HCD	1	0	1	1	257			8.58934e+07	Light	Unique	Used	8.58934e+07	5.46842e+07	0.636652	0.886623
LRnHRREERWADAHYK	Unambiguous	40S ribosomal protein S23 [Schizosaccharomyces pombe 972h-]	1	1	19112979	N3(Deamidated)	HCD	1	0	1	1	406			2.93618e+07	Light	Unique	Used	2.93618e+07	1.88166e+07	0.640853	0.893374
LRNHRREERWADAHYK	Unambiguous	40S ribosomal protein S23 [Schizosaccharomyces pombe 972h-]	1	1	19112979		HCD	1	0	1	1	279			1.21329e+09	Light	Unique	Used	1212170482	7.821e+08	0.645206	0.900384
LRNHRREERWADAHYk	Unambiguous	40S ribosomal protein S23 [Schizosaccharomyces pombe 972h-]	1	1	19112979	K16(Label:13C(6)15N(2))	HCD	1	0	1	1	2002			1.39579e+09	Heavy	Unique	Used	2149696346	1.39579e+09	0.649298	0.906986
LRnHRREERWADAHYk	Unambiguous	40S ribosomal protein S23 [Schizosaccharomyces pombe 972h-]	1	1	19112979	N3(Deamidated); K16(Label:13C(6)15N(2))	HCD	1	0	1	1	429			6.21262e+07	Heavy	Unique	Used	9.13673e+07	6.21262e+07	0.679962	0.95688
LRNHRREERWADAHYk	Unambiguous	40S ribosomal protein S23 [Schizosaccharomyces pombe 972h-]	1	1	19112979	K16(Label:13C(6)15N(2))	HCD	1	0	1	1	261			1.49315e+07	Heavy	Unique	Used	1.86444e+07	1.49315e+07	0.800856	1.16104
RLLGTAYK	Unambiguous	40S ribosomal protein S23 [Schizosaccharomyces pombe 972h-]	1	1	19112979		HCD	1	0	1	1	2551			5230994218	Light	Unique	Used	5230994218	3148454455	0.601885	0.831272
RLLGTAYK	Unambiguous	40S ribosomal protein S23 [Schizosaccharomyces pombe 972h-]	1	1	19112979		HCD	1	0	1	1	2706			651970937	Light	Unique	Used	651970937	4.03877e+08	0.619472	0.859156
RLLGTAYK	Unambiguous	40S ribosomal protein S23 [Schizosaccharomyces pombe 972h-]	1	1	19112979		HCD	1	0	1	1	556			1526688162	Light	Unique	Used	1526688162	960758609	0.629309	0.874856
RLLGTAYK	Unambiguous	40S ribosomal protein S23 [Schizosaccharomyces pombe 972h-]	1	1	19112979		HCD	1	0	1	1	487			7456786038	Light	Unique	Used	7456786038	4.74416e+09	0.63622	0.885931
RLLGTAYKSSPFGGSSHAK	Unambiguous	40S ribosomal protein S23 [Schizosaccharomyces pombe 972h-]	1	1	19112979		HCD	1	0	1	1	4777			3.74899e+06	Light	Unique	Used	3.74899e+06	2.11886e+06	0.565182	0.773823
SSPFGGSSHAK	Unambiguous	40S ribosomal protein S23 [Schizosaccharomyces pombe 972h-]	1	1	19112979		HCD	1	0	1	1	4588			1.5895e+08	Light	Unique	Used	1.5895e+08	9.37405e+07	0.589747	0.812163
SSPFGGSSHAk	Unambiguous	40S ribosomal protein S23 [Schizosaccharomyces pombe 972h-]	1	1	19112979	K11(Label:13C(6)15N(2))	HCD	1	0	1	1	4589			7.50842e+07	Heavy	Unique	Used	1.20386e+08	7.50842e+07	0.623695	0.865887
SSPFGGSSHAK	Unambiguous	40S ribosomal protein S23 [Schizosaccharomyces pombe 972h-]	1	1	19112979		HCD	1	0	1	1	353			2.23189e+08	Light	Unique	Used	2.23189e+08	140166017	0.628015	0.872787
SSPFGGSSHAK	Unambiguous	40S ribosomal protein S23 [Schizosaccharomyces pombe 972h-]	1	1	19112979		HCD	1	0	1	1	2613			73589657	Light	Unique	Used	73589657	4.64348e+07	0.630996	0.877556
SSPFGGSSHAk	Unambiguous	40S ribosomal protein S23 [Schizosaccharomyces pombe 972h-]	1	1	19112979	K11(Label:13C(6)15N(2))	HCD	1	0	1	1	241			118788813	Heavy	Unique	Used	187875722	118788813	0.632273	0.879602
SSPFGGSSHAK	Unambiguous	40S ribosomal protein S23 [Schizosaccharomyces pombe 972h-]	1	1	19112979		HCD	1	0	1	1	239			891154743	Light	Unique	Used	891154743	5.65217e+08	0.634253	0.882774
SSPFGGSSHAK	Unambiguous	40S ribosomal protein S23 [Schizosaccharomyces pombe 972h-]	1	1	19112979		HCD	1	0	1	1	2486			369670835	Light	Unique	Used	369670835	2.40446e+08	0.650431	0.908818
SSPFGGSSHAK	Unambiguous	40S ribosomal protein S23 [Schizosaccharomyces pombe 972h-]	1	1	19112979		HCD	1	0	1	1	1862			1.90932e+06	Light	Unique	Used	1.90932e+06	1.25065e+06	0.655025	0.916249
SSPFGGSSHAk	Unambiguous	40S ribosomal protein S23 [Schizosaccharomyces pombe 972h-]	1	1	19112979	K11(Label:13C(6)15N(2))	HCD	1	0	1	1	1894			8.89425e+06	Heavy	Unique	Used	13496855	8.89425e+06	0.658987	0.922672
SSPFGGSSHAk	Unambiguous	40S ribosomal protein S23 [Schizosaccharomyces pombe 972h-]	1	1	19112979	K11(Label:13C(6)15N(2))	HCD	1	0	1	1	2489			1.09396e+08	Heavy	Unique	Used	154197612	1.09396e+08	0.709456	1.00558
SSPFGGSSHAK	Unambiguous	40S ribosomal protein S23 [Schizosaccharomyces pombe 972h-]	1	1	19112979		HCD	1	0	1	1	4660		1	1.69256e+06	Light	Unique	Used	1.05797e+06	859968	0.81285	1.18196
VAGVGLSALFHEK	Unambiguous	40S ribosomal protein S23 [Schizosaccharomyces pombe 972h-]	1	1	19112979		HCD	1	0	1	1	5266			2.62938e+06	Light	Unique	Used	2.62938e+06	1.3199e+06	0.50198	0.677196
VAGVGLSALFHEK	Unambiguous	40S ribosomal protein S23 [Schizosaccharomyces pombe 972h-]	1	1	19112979		HCD	1	0	1	1	3637		1	2.51049e+06	Light	Unique	Used	1.81854e+06	922288	0.50716	0.685008
VAGVGLSALFHEk	Unambiguous	40S ribosomal protein S23 [Schizosaccharomyces pombe 972h-]	1	1	19112979	K13(Label:13C(6)15N(2))	HCD	1	0	1	1	1691			1.23577e+07	Heavy	Unique	Used	2.07837e+07	1.23577e+07	0.594586	0.819768
VAGVGLSALFHEK	Unambiguous	40S ribosomal protein S23 [Schizosaccharomyces pombe 972h-]	1	1	19112979		HCD	1	0	1	1	3794			2.9398e+08	Light	Unique	Used	291263789	1.77e+08	0.607696	0.84046
VAGVGLSALFHEK	Unambiguous	40S ribosomal protein S23 [Schizosaccharomyces pombe 972h-]	1	1	19112979		HCD	1	0	1	1	5213			3.37849e+08	Light	Unique	Used	3.37849e+08	2.12807e+08	0.629889	0.875784
VAGVGLSALFHEK	Unambiguous	40S ribosomal protein S23 [Schizosaccharomyces pombe 972h-]	1	1	19112979		HCD	1	0	1	1	3587			5.51054e+09	Light	Unique	Used	5.51054e+09	3526697175	0.639991	0.891988
VAGVGLSALFHEK	Unambiguous	40S ribosomal protein S23 [Schizosaccharomyces pombe 972h-]	1	1	19112979		HCD	1	0	1	1	1565			8.04201e+08	Light	Unique	Used	8.04201e+08	5.15071e+08	0.640475	0.892766
VAGVGLSALFHEk	Unambiguous	40S ribosomal protein S23 [Schizosaccharomyces pombe 972h-]	1	1	19112979	K13(Label:13C(6)15N(2))	HCD	1	0	1	1	3586			7185854440	Heavy	Unique	Used	11120190200	7185854440	0.646199	0.901985
VAGVGLSALFHEK	Unambiguous	40S ribosomal protein S23 [Schizosaccharomyces pombe 972h-]	1	1	19112979		HCD	1	0	1	1	5214			1.32525e+08	Light	Unique	Used	1.32243e+08	8.57607e+07	0.648507	0.905708
VAGVGLSALFHEK	Unambiguous	40S ribosomal protein S23 [Schizosaccharomyces pombe 972h-]	1	1	19112979		HCD	1	0	1	1	1564			7.08507e+08	Light	Unique	Used	7.08296e+08	4.61277e+08	0.651249	0.910139
																						0.87532	=median(rak)
Unmodified P62
Sequence	PSM Ambiguity	Protein Descriptions	# Proteins	# Protein Groups	Protein Group Accessions	Modifications	Activation Type	ΔScore	ΔCn	Rank	Search Engine Rank	QuanResultID	# Missing Channels	# Single-Peak Channels	Precursor Area	Quan Channel	Quan Info	Quan Usage	Light	Heavy	H/L (pl)	pnl=(pl) / (med(rak))	pal	log2(pal)
QPNSAIRK	Unambiguous	40S ribosomal protein S23 [Schizosaccharomyces pombe 972h-]	1	1	19112979		HCD	1	0	1	1	310		1	4.36367e+08	Light	Unique	Used	283194656	1.55025e+06	0.00547416	0.00625389	0.00756527	-7.04639
QPNSAIRK	Unambiguous	40S ribosomal protein S23 [Schizosaccharomyces pombe 972h-]	1	1	19112979		HCD	1	0	1	1	177			1.97746e+09	Light	Unique	Used	1955022832	1.39122e+07	0.00711611	0.00812972	0.00983829	-6.66738
QPNSAIRK	Unambiguous	40S ribosomal protein S23 [Schizosaccharomyces pombe 972h-]	1	1	19112979		HCD	1	0	1	1	2448	1		1.97553e+07	Light	Unique	Used	13169809	17297.2	0.00131339	0.00150047	0.00181331	-9.10716
Dihydroxylated P62
Sequence	PSM Ambiguity	Protein Descriptions	# Proteins	# Protein Groups	Protein Group Accessions	Modifications	Activation Type	ΔScore	ΔCn	Rank	Search Engine Rank	QuanResultID	# Missing Channels	# Single-Peak Channels	Precursor Area	Quan Channel	Quan Info	Quan Usage	Light	Heavy	H/L (pl)	pnl=(pl) / (med(rak))	pal	log2(pal)
QpNSAIRk	Unambiguous	40S ribosomal protein S23 [Schizosaccharomyces pombe 972h-]	1	1	19112979	P2(Dioxidation); K8(Label:13C(6)15N(2))	HCD	1	0	1	1	121			369836760	Heavy	Unique	Used	7.95864e+07	369836760	4.64699	5.3089	61.1645	5.93462
QpNSAIRK	Unambiguous	40S ribosomal protein S23 [Schizosaccharomyces pombe 972h-]	1	1	19112979	P2(Dioxidation)	HCD	1	0	1	1	160			2.87701e+07	Light	Unique	Used	2.87701e+07	1.46576e+08	5.09473	5.82042	33.2758	5.0564
QpNSAIRk	Unambiguous	40S ribosomal protein S23 [Schizosaccharomyces pombe 972h-]	1	1	19112979	P2(Dioxidation); K8(Label:13C(6)15N(2))	HCD	1	0	1	1	2427		1	3.32425e+07	Heavy	Unique	Used	3419007	20135486	5.88928	6.72814	20.3094	4.34408

## Sheet: WT(H)-ofd1H142AD144A(L)
Sequence	PSM Ambiguity	Protein Descriptions	# Proteins	# Protein Groups	Protein Group Accessions	Modifications	Activation Type	ΔScore	ΔCn	Rank	Search Engine Rank	QuanResultID	# Missing Channels	# Single-Peak Channels	Precursor Area	Quan Channel	Quan Info	Quan Usage	Light	Heavy	H/L (rk)	rak
CVRVQLIK	Unambiguous	40S ribosomal protein S23 [Schizosaccharomyces pombe 972h-]	1	1	19112979		HCD	1	0	1	1	512		1	1.08642e+07	Light	Unique	Used	7012833	5.059e+06	0.721392	1.02548
GDIPGVRFk	Unambiguous	40S ribosomal protein S23 [Schizosaccharomyces pombe 972h-]	1	1	19112979	K9(Label:13C(6)15N(2))	HCD	1	0	1	1	899			91724117	Heavy	Unique	Used	187353374	91724117	0.489578	0.658567
GDIPGVRFK	Unambiguous	40S ribosomal protein S23 [Schizosaccharomyces pombe 972h-]	1	1	19112979		HCD	1	0	1	1	424			1.06519e+08	Light	Unique	Used	1.06371e+08	73699403	0.69285	0.978073
GDIPGVRFK	Unambiguous	40S ribosomal protein S23 [Schizosaccharomyces pombe 972h-]	1	1	19112979		HCD	1	0	1	1	2779			668082298	Light	Unique	Used	668082298	4.6515e+08	0.696246	0.98368
GDIPGVRFk	Unambiguous	40S ribosomal protein S23 [Schizosaccharomyces pombe 972h-]	1	1	19112979	K9(Label:13C(6)15N(2))	HCD	1	0	1	1	845			5.10401e+09	Heavy	Unique	Used	7228548848	5.10401e+09	0.706091	0.999985
GDIPGVRFK	Unambiguous	40S ribosomal protein S23 [Schizosaccharomyces pombe 972h-]	1	1	19112979		HCD	1	0	1	1	4746			7.60197e+07	Light	Unique	Used	7.60197e+07	5.40026e+07	0.710377	1.00711
GDIPGVRFk	Unambiguous	40S ribosomal protein S23 [Schizosaccharomyces pombe 972h-]	1	1	19112979	K9(Label:13C(6)15N(2))	HCD	1	0	1	1	2655			5.285e+09	Heavy	Unique	Used	7314609278	5283291396	0.722293	1.02699
GDIPGVRFK	Unambiguous	40S ribosomal protein S23 [Schizosaccharomyces pombe 972h-]	1	1	19112979		HCD	1	0	1	1	892		1	72380936	Light	Unique	Used	72380936	56397344	0.779174	1.12352
GKPAGLnAARK	Unambiguous	40S ribosomal protein S23 [Schizosaccharomyces pombe 972h-]	1	1	19112979	N7(Deamidated)	HCD	1	0	1	1	368			1.63774e+07	Light	Unique	Used	1.63774e+07	9.09309e+06	0.555222	0.758406
GKPAGLNAARK	Unambiguous	40S ribosomal protein S23 [Schizosaccharomyces pombe 972h-]	1	1	19112979		HCD	1	0	1	1	217			2.40747e+08	Light	Unique	Used	2.40747e+08	154330074	0.641047	0.893687
GkPAGLNAARk	Unambiguous	40S ribosomal protein S23 [Schizosaccharomyces pombe 972h-]	1	1	19112979	K2(Label:13C(6)15N(2)); K11(Label:13C(6)15N(2))	HCD	1	0	1	1	155			4.77113e+08	Heavy	Unique	Used	734101287	4.77113e+08	0.649928	0.908004
GKPAGLnAARK	Unambiguous	40S ribosomal protein S23 [Schizosaccharomyces pombe 972h-]	1	1	19112979	N7(Deamidated)	HCD	1	0	1	1	236			114971718	Light	Unique	Used	114971718	76758398	0.667629	0.936724
GkPAGLNAARk	Unambiguous	40S ribosomal protein S23 [Schizosaccharomyces pombe 972h-]	1	1	19112979	K2(Label:13C(6)15N(2)); K11(Label:13C(6)15N(2))	HCD	1	0	1	1	63			1.44026e+07	Heavy	Unique	Used	2.14616e+07	1.44026e+07	0.671086	0.942362
GkPAGLNAARk	Unambiguous	40S ribosomal protein S23 [Schizosaccharomyces pombe 972h-]	1	1	19112979	K2(Label:13C(6)15N(2)); K11(Label:13C(6)15N(2))	HCD	1	0	1	1	4448			1.54952e+07	Heavy	Unique	Used	2.27621e+07	1.54952e+07	0.680744	0.958163
GkPAGLNAARk	Unambiguous	40S ribosomal protein S23 [Schizosaccharomyces pombe 972h-]	1	1	19112979	K2(Label:13C(6)15N(2)); K11(Label:13C(6)15N(2))	HCD	1	0	1	1	57			2.32142e+08	Heavy	Unique	Used	3.39434e+08	2.32142e+08	0.68391	0.963358
GkPAGLNAARk	Unambiguous	40S ribosomal protein S23 [Schizosaccharomyces pombe 972h-]	1	1	19112979	K2(Label:13C(6)15N(2)); K11(Label:13C(6)15N(2))	HCD	1	0	1	1	156			558502026	Heavy	Unique	Used	808925025	558502026	0.690425	0.974075
GkPAGLNAARk	Unambiguous	40S ribosomal protein S23 [Schizosaccharomyces pombe 972h-]	1	1	19112979	K2(Label:13C(6)15N(2)); K11(Label:13C(6)15N(2))	HCD	1	0	1	1	2204			176692385	Heavy	Unique	Used	254985645	176692385	0.69295	0.978239
GkPAGLNAARk	Unambiguous	40S ribosomal protein S23 [Schizosaccharomyces pombe 972h-]	1	1	19112979	K2(Label:13C(6)15N(2)); K11(Label:13C(6)15N(2))	HCD	1	0	1	1	2318			8.67679e+06	Heavy	Unique	Used	11753281	8.67679e+06	0.738244	1.05379
LRNHRREERWADAHYK	Unambiguous	40S ribosomal protein S23 [Schizosaccharomyces pombe 972h-]	1	1	19112979		HCD	1	0	1	1	4014		1	152088167	Light	Unique	Used	47225432	933116	0.0197588	0.0239694
LRNHRREERWADAHYK	Unambiguous	40S ribosomal protein S23 [Schizosaccharomyces pombe 972h-]	1	1	19112979		HCD	1	0	1	1	2217			5.5437e+07	Light	Unique	Used	5.5437e+07	55731123	1.00531	1.53586
RLLGTAYK	Unambiguous	40S ribosomal protein S23 [Schizosaccharomyces pombe 972h-]	1	1	19112979		HCD	1	0	1	1	2308			5991688406	Light	Unique	Used	5991688406	4.10165e+09	0.684556	0.96442
RLLGTAYK	Unambiguous	40S ribosomal protein S23 [Schizosaccharomyces pombe 972h-]	1	1	19112979		HCD	1	0	1	1	4536			3.81883e+08	Light	Unique	Used	3.81121e+08	2.67924e+08	0.702989	0.99484
RLLGTAYK	Unambiguous	40S ribosomal protein S23 [Schizosaccharomyces pombe 972h-]	1	1	19112979		HCD	1	0	1	1	2455			894955218	Light	Unique	Used	894955218	634213947	0.708654	1.00424
RLLGTAYK	Unambiguous	40S ribosomal protein S23 [Schizosaccharomyces pombe 972h-]	1	1	19112979		HCD	1	0	1	1	590			2170871722	Light	Unique	Used	2170871722	1541001855	0.709854	1.00624
RLLGTAYK	Unambiguous	40S ribosomal protein S23 [Schizosaccharomyces pombe 972h-]	1	1	19112979		HCD	1	0	1	1	209			8.03796e+08	Light	Unique	Used	8.03796e+08	5.75638e+08	0.716149	1.01672
RLLGTAYK	Unambiguous	40S ribosomal protein S23 [Schizosaccharomyces pombe 972h-]	1	1	19112979		HCD	1	0	1	1	495			8.49442e+09	Light	Unique	Used	8493304726	6.11521e+09	0.720004	1.02316
RLLGTAYKSSPFGGSSHAK	Unambiguous	40S ribosomal protein S23 [Schizosaccharomyces pombe 972h-]	1	1	19112979		HCD	1	0	1	1	4656			1.66007e+06	Light	Unique	Used	1.66007e+06	1.09843e+06	0.661676	0.927038
SSPFGGSSHAk	Unambiguous	40S ribosomal protein S23 [Schizosaccharomyces pombe 972h-]	1	1	19112979	K11(Label:13C(6)15N(2))	HCD	1	0	1	1	4556			800069	Heavy	Unique	Used	1.27254e+06	800069	0.62872	0.873914
SSPFGGSSHAK	Unambiguous	40S ribosomal protein S23 [Schizosaccharomyces pombe 972h-]	1	1	19112979		HCD	1	0	1	1	386			3.21857e+08	Light	Unique	Used	3.21857e+08	2.24844e+08	0.698584	0.987545
SSPFGGSSHAK	Unambiguous	40S ribosomal protein S23 [Schizosaccharomyces pombe 972h-]	1	1	19112979		HCD	1	0	1	1	260			9.8941e+08	Light	Unique	Used	9.8941e+08	7.05312e+08	0.71286	1.01124
SSPFGGSSHAK	Unambiguous	40S ribosomal protein S23 [Schizosaccharomyces pombe 972h-]	1	1	19112979		HCD	1	0	1	1	2231			7.79081e+08	Light	Unique	Used	777538178	555580262	0.714538	1.01404
SSPFGGSSHAK	Unambiguous	40S ribosomal protein S23 [Schizosaccharomyces pombe 972h-]	1	1	19112979		HCD	1	0	1	1	122			5.12764e+08	Light	Unique	Used	5.12764e+08	3.69109e+08	0.719842	1.02289
SSPFGGSSHAK	Unambiguous	40S ribosomal protein S23 [Schizosaccharomyces pombe 972h-]	1	1	19112979		HCD	1	0	1	1	4472			1.58443e+08	Light	Unique	Used	158037209	113792971	0.720039	1.02322
SSPFGGSSHAK	Unambiguous	40S ribosomal protein S23 [Schizosaccharomyces pombe 972h-]	1	1	19112979		HCD	1	0	1	1	2336			2.28689e+08	Light	Unique	Used	2.28689e+08	166480668	0.727978	1.03652
SSPFGGSSHAk	Unambiguous	40S ribosomal protein S23 [Schizosaccharomyces pombe 972h-]	1	1	19112979	K11(Label:13C(6)15N(2))	HCD	1	0	1	1	4474			8.97092e+07	Heavy	Unique	Used	1.21945e+08	8.97092e+07	0.735653	1.04942
SSPFGGSSHAk	Unambiguous	40S ribosomal protein S23 [Schizosaccharomyces pombe 972h-]	1	1	19112979	K11(Label:13C(6)15N(2))	HCD	1	0	1	1	123			2.46663e+07	Heavy	Unique	Used	3.33737e+07	2.46663e+07	0.739094	1.05522
SSPFGGSSHAk	Unambiguous	40S ribosomal protein S23 [Schizosaccharomyces pombe 972h-]	1	1	19112979	K11(Label:13C(6)15N(2))	HCD	1	0	1	1	2232			235257040	Heavy	Unique	Used	3.03721e+08	235257040	0.774583	1.11563
SSPFGGSSHAK	Unambiguous	40S ribosomal protein S23 [Schizosaccharomyces pombe 972h-]	1	1	19112979		HCD	1	0	1	1	228			6.10167e+06	Light	Unique	Used	6.10167e+06	4.8151e+06	0.789145	1.14072
SSPFGGSSHAk	Unambiguous	40S ribosomal protein S23 [Schizosaccharomyces pombe 972h-]	1	1	19112979	K11(Label:13C(6)15N(2))	HCD	1	0	1	1	263			132733576	Heavy	Unique	Used	166744042	132733576	0.796032	1.15265
VAGVGLSALFHEK	Unambiguous	40S ribosomal protein S23 [Schizosaccharomyces pombe 972h-]	1	1	19112979		HCD	1	0	1	1	3461		1	7.72055e+06	Light	Unique	Used	4.09112e+06	769858	0.188178	0.236606
VAGVGLSALFHEk	Unambiguous	40S ribosomal protein S23 [Schizosaccharomyces pombe 972h-]	1	1	19112979	K13(Label:13C(6)15N(2))	HCD	1	0	1	1	1452			1.40661e+06	Heavy	Unique	Used	2.62793e+06	1.40661e+06	0.535253	0.72771
VAGVGLSALFHEk	Unambiguous	40S ribosomal protein S23 [Schizosaccharomyces pombe 972h-]	1	1	19112979	K13(Label:13C(6)15N(2))	HCD	1	0	1	1	678			4.54339e+07	Heavy	Unique	Used	6.52778e+07	4.54339e+07	0.696008	0.983286
VAGVGLSALFHEK	Unambiguous	40S ribosomal protein S23 [Schizosaccharomyces pombe 972h-]	1	1	19112979		HCD	1	0	1	1	3539			3.88009e+08	Light	Unique	Used	382886536	2.67328e+08	0.698191	0.986895
VAGVGLSALFHEK	Unambiguous	40S ribosomal protein S23 [Schizosaccharomyces pombe 972h-]	1	1	19112979		HCD	1	0	1	1	1428			326372450	Light	Unique	Used	326372450	2.34609e+08	0.718839	1.02121
VAGVGLSALFHEK	Unambiguous	40S ribosomal protein S23 [Schizosaccharomyces pombe 972h-]	1	1	19112979		HCD	1	0	1	1	1427			7.34257e+08	Light	Unique	Used	7.33981e+08	5.29046e+08	0.72079	1.02448
VAGVGLSALFHEK	Unambiguous	40S ribosomal protein S23 [Schizosaccharomyces pombe 972h-]	1	1	19112979		HCD	1	0	1	1	677			2.28201e+08	Light	Unique	Used	2.28021e+08	1.64792e+08	0.722705	1.02768
VAGVGLSALFHEk	Unambiguous	40S ribosomal protein S23 [Schizosaccharomyces pombe 972h-]	1	1	19112979	K13(Label:13C(6)15N(2))	HCD	1	0	1	1	3415			8.01371e+09	Heavy	Unique	Used	11061216748	8.01371e+09	0.724487	1.03066
VAGVGLSALFHEK	Unambiguous	40S ribosomal protein S23 [Schizosaccharomyces pombe 972h-]	1	1	19112979		HCD	1	0	1	1	3416			5998337343	Light	Unique	Used	5995790727	4.36794e+09	0.728501	1.03739
																						1.00524	=median(rak)
Unmodified P62
Sequence	PSM Ambiguity	Protein Descriptions	# Proteins	# Protein Groups	Protein Group Accessions	Modifications	Activation Type	ΔScore	ΔCn	Rank	Search Engine Rank	QuanResultID	# Missing Channels	# Single-Peak Channels	Precursor Area	Quan Channel	Quan Info	Quan Usage	Light	Heavy	H/L (pl)	pnl=(pl) / (med(rak))	pal	log2(pal)
QPNSAIRK	Unambiguous	40S ribosomal protein S23 [Schizosaccharomyces pombe 972h-]	1	1	19112979		HCD	1	0	1	1	148			9.9989e+08	Light	Unique	Used	989441252	7.19998e+06	0.00727681	0.00723888	0.00875859	-6.83509
QPNSAIRK	Unambiguous	40S ribosomal protein S23 [Schizosaccharomyces pombe 972h-]	1	1	19112979		HCD	1	0	1	1	2192	1		2.93853e+07	Light	Unique	Used	20466740	6585.05	0.000321744	0.000320067	0.000386703	-11.3365
QPNSAIRK	Unambiguous	40S ribosomal protein S23 [Schizosaccharomyces pombe 972h-]	1	1	19112979		HCD	1	0	1	1	211		1	244609281	Light	Unique	Used	159652128	851949	0.00533628	0.00530846	0.00642033	-7.28314
QPNSAIRK	Unambiguous	40S ribosomal protein S23 [Schizosaccharomyces pombe 972h-]	1	1	19112979		HCD	1	0	1	1	2170	1		791936	Light	Unique	Used	553064	6585.05	0.0119065	0.0118444	0.0143448	-6.12333
QPNSAIRK	Unambiguous	40S ribosomal protein S23 [Schizosaccharomyces pombe 972h-]	1	1	19112979		HCD	1	0	1	1	51		1	4.89616e+07	Light	Unique	Used	33101882	445752	0.0134661	0.0133959	0.016229	-5.94528
Dihydroxylated P62
Sequence	PSM Ambiguity	Protein Descriptions	# Proteins	# Protein Groups	Protein Group Accessions	Modifications	Activation Type	ΔScore	ΔCn	Rank	Search Engine Rank	QuanResultID	# Missing Channels	# Single-Peak Channels	Precursor Area	Quan Channel	Quan Info	Quan Usage	Light	Heavy	H/L (pl)	pnl=(pl) / (med(rak))	pal	log2(pal)
QpNSAIRk	Unambiguous	40S ribosomal protein S23 [Schizosaccharomyces pombe 972h-]	1	1	19112979	P2(Dioxidation); K8(Label:13C(6)15N(2))	HCD	1	0	1	1	4		1	108158	Heavy	Unique	Used	93705.6	108158	1.15423	1.14822	1.82274	0.866111
QpNSAIRK	Unambiguous	40S ribosomal protein S23 [Schizosaccharomyces pombe 972h-]	1	1	19112979	P2(Dioxidation)	HCD	1	0	1	1	194			2.29838e+07	Light	Unique	Used	2.29838e+07	9.54982e+07	4.15503	4.13337	35.7234	5.1588
QpNSAIRk	Unambiguous	40S ribosomal protein S23 [Schizosaccharomyces pombe 972h-]	1	1	19112979	P2(Dioxidation); K8(Label:13C(6)15N(2))	HCD	1	0	1	1	129			412284322	Heavy	Unique	Used	9.24576e+07	412284322	4.45917	4.43593	69.7639	6.12441
QpNSAIRk	Unambiguous	40S ribosomal protein S23 [Schizosaccharomyces pombe 972h-]	1	1	19112979	P2(Dioxidation); K8(Label:13C(6)15N(2))	HCD	1	0	1	1	6		1	1.08894e+06	Heavy	Unique	Used	218908	1.08894e+06	4.97443	4.9485	200.243	7.64561
QpNSAIRk	Unambiguous	40S ribosomal protein S23 [Schizosaccharomyces pombe 972h-]	1	1	19112979	P2(Dioxidation); K8(Label:13C(6)15N(2))	HCD	1	0	1	1	2164			3.05585e+07	Heavy	Unique	Used	6.12985e+06	3.05585e+07	4.98519	4.95921	186.736	7.54485
QpNSAIRk	Unambiguous	40S ribosomal protein S23 [Schizosaccharomyces pombe 972h-]	1	1	19112979	P2(Dioxidation); K8(Label:13C(6)15N(2))	HCD	1	0	1	1	16			2.46139e+07	Heavy	Unique	Used	3.3783e+06	23381117	6.92097	6.88489	19.2163	4.26426
QpNSAIRk	Unambiguous	40S ribosomal protein S23 [Schizosaccharomyces pombe 972h-]	1	1	19112979	P2(Dioxidation); K8(Label:13C(6)15N(2))	HCD	1	0	1	1	176		1	234789751	Heavy	Unique	Used	6347235	168363472	26.5255	26.3872	7.09747	2.8273
QpNSAIRK	Unambiguous	40S ribosomal protein S23 [Schizosaccharomyces pombe 972h-]	1	1	19112979	P2(Dioxidation)	HCD	1	0	1	1	185	1		8.79625e+06	Light	Unique	Used	6309684	6585.05	0.00104364	0.0010382	0.00125454	-9.63863
QpNSAIRK	Unambiguous	40S ribosomal protein S23 [Schizosaccharomyces pombe 972h-]	1	1	19112979	P2(Dioxidation)	HCD	1	0	1	1	116	1		1.72494e+08	Light	Unique	Used	95597608	6585.05	6.8883e-05	6.85239e-05	8.2786e-05	-13.5603

## Sheet: WT (H)-nro1Δ (L)
Sequence	PSM Ambiguity	Protein Descriptions	# Proteins	# Protein Groups	Protein Group Accessions	Modifications	Activation Type	ΔScore	ΔCn	Rank	Search Engine Rank	QuanResultID	# Missing Channels	# Single-Peak Channels	Precursor Area	Quan Channel	Quan Info	Quan Usage	Light	Heavy	H/L (rk)	rak
CVRVQLIK	Unambiguous	40S ribosomal protein S23 [Schizosaccharomyces pombe 972h-]	1	1	19112979		HCD	1	0	1	1	472		1	1.34812e+06	Light	Unique	Used	891804	661411	0.741655	1.05954
CVRVQLIK	Unambiguous	40S ribosomal protein S23 [Schizosaccharomyces pombe 972h-]	1	1	19112979		HCD	1	0	1	1	827		1	8.6826e+06	Light	Unique	Used	5.71235e+06	4.61015e+06	0.80705	1.17183
GDIPGVRFK	Unambiguous	40S ribosomal protein S23 [Schizosaccharomyces pombe 972h-]	1	1	19112979		HCD	1	0	1	1	759			3.78017e+06	Light	Unique	Used	3.78017e+06	2.59227e+06	0.685755	0.96639
GDIPGVRFK	Unambiguous	40S ribosomal protein S23 [Schizosaccharomyces pombe 972h-]	1	1	19112979		HCD	1	0	1	1	2312			403571814	Light	Unique	Used	403571814	3.0021e+08	0.743883	1.06331
GDIPGVRFk	Unambiguous	40S ribosomal protein S23 [Schizosaccharomyces pombe 972h-]	1	1	19112979	K9(Label:13C(6)15N(2))	HCD	1	0	1	1	351			1.63215e+08	Heavy	Unique	Used	2.17841e+08	163079809	0.748619	1.07133
GDIPGVRFk	Unambiguous	40S ribosomal protein S23 [Schizosaccharomyces pombe 972h-]	1	1	19112979	K9(Label:13C(6)15N(2))	HCD	1	0	1	1	4020			596913208	Heavy	Unique	Used	797080331	596913208	0.748875	1.07176
GDIPGVRFk	Unambiguous	40S ribosomal protein S23 [Schizosaccharomyces pombe 972h-]	1	1	19112979	K9(Label:13C(6)15N(2))	HCD	1	0	1	1	2268			4.49626e+09	Heavy	Unique	Used	5903353834	4.49626e+09	0.761645	1.09348
GDIPGVRFK	Unambiguous	40S ribosomal protein S23 [Schizosaccharomyces pombe 972h-]	1	1	19112979		HCD	1	0	1	1	3881			11440918940	Light	Unique	Used	11440918940	8747656931	0.764594	1.09852
GDIPGVRFk	Unambiguous	40S ribosomal protein S23 [Schizosaccharomyces pombe 972h-]	1	1	19112979	K9(Label:13C(6)15N(2))	HCD	1	0	1	1	729			1.16348e+09	Heavy	Unique	Used	1.51079e+09	1.16348e+09	0.770114	1.10796
GIVVEkIGVEAk	Unambiguous	40S ribosomal protein S23 [Schizosaccharomyces pombe 972h-]	1	1	19112979	K6(Label:13C(6)15N(2)); K12(Label:13C(6)15N(2))	HCD	1	0	1	1	361			1.49208e+06	Heavy	Unique	Used	1.93654e+06	1.49208e+06	0.770486	1.1086
GKPAGLNAARK	Unambiguous	40S ribosomal protein S23 [Schizosaccharomyces pombe 972h-]	1	1	19112979		HCD	1	0	1	1	3326	1		6.46213e+06	Light	Unique	Used	5.27429e+06	6095.98	0.00115579	0.00139667
GKPAGLNAARK	Unambiguous	40S ribosomal protein S23 [Schizosaccharomyces pombe 972h-]	1	1	19112979		HCD	1	0	1	1	3328			464712	Light	Unique	Used	452293	96571.3	0.213515	0.269946
GKPAGLNAARK	Unambiguous	40S ribosomal protein S23 [Schizosaccharomyces pombe 972h-]	1	1	19112979		HCD	1	0	1	1	3334			459830	Light	Unique	Used	446690	171651	0.384274	0.504601
GkPAGLnAARk	Unambiguous	40S ribosomal protein S23 [Schizosaccharomyces pombe 972h-]	1	1	19112979	K2(Label:13C(6)15N(2)); N7(Deamidated); K11(Label:13C(6)15N(2))	HCD	1	0	1	1	1759			7.62445e+06	Heavy	Unique	Used	1.43533e+07	7.62445e+06	0.531199	0.721513
GKPAGLNAARK	Unambiguous	40S ribosomal protein S23 [Schizosaccharomyces pombe 972h-]	1	1	19112979		HCD	1	0	1	1	3338			1.42138e+07	Light	Unique	Used	1.42138e+07	8128416	0.571868	0.784215
GkPAGLNAARk	Unambiguous	40S ribosomal protein S23 [Schizosaccharomyces pombe 972h-]	1	1	19112979	K2(Label:13C(6)15N(2)); K11(Label:13C(6)15N(2))	HCD	1	0	1	1	3335			7.83401e+07	Heavy	Unique	Used	125097666	7.83401e+07	0.626231	0.869936
GkPAGLNAARk	Unambiguous	40S ribosomal protein S23 [Schizosaccharomyces pombe 972h-]	1	1	19112979	K2(Label:13C(6)15N(2)); K11(Label:13C(6)15N(2))	HCD	1	0	1	1	5266			4.81819e+06	Heavy	Unique	Used	7.64911e+06	4.81819e+06	0.629902	0.875805
GkPAGLNAARk	Unambiguous	40S ribosomal protein S23 [Schizosaccharomyces pombe 972h-]	1	1	19112979	K2(Label:13C(6)15N(2)); K11(Label:13C(6)15N(2))	HCD	1	0	1	1	22			9.233e+06	Heavy	Unique	Used	1.38828e+07	9.233e+06	0.665067	0.932551
GkPAGLNAARk	Unambiguous	40S ribosomal protein S23 [Schizosaccharomyces pombe 972h-]	1	1	19112979	K2(Label:13C(6)15N(2)); K11(Label:13C(6)15N(2))	HCD	1	0	1	1	1750			134142439	Heavy	Unique	Used	195555628	134142439	0.685955	0.966719
GkPAGLNAARk	Unambiguous	40S ribosomal protein S23 [Schizosaccharomyces pombe 972h-]	1	1	19112979	K2(Label:13C(6)15N(2)); K11(Label:13C(6)15N(2))	HCD	1	0	1	1	162			1.36876e+08	Heavy	Unique	Used	197145044	1.36876e+08	0.69429	0.980448
GkPAGLnAARk	Unambiguous	40S ribosomal protein S23 [Schizosaccharomyces pombe 972h-]	1	1	19112979	K2(Label:13C(6)15N(2)); N7(Deamidated); K11(Label:13C(6)15N(2))	HCD	1	0	1	1	1513			72301617	Heavy	Unique	Used	103754780	72301617	0.696851	0.984679
GkPAGLNAARk	Unambiguous	40S ribosomal protein S23 [Schizosaccharomyces pombe 972h-]	1	1	19112979	K2(Label:13C(6)15N(2)); K11(Label:13C(6)15N(2))	HCD	1	0	1	1	3330			4.62024e+06	Heavy	Unique	Used	6.30934e+06	4.47906e+06	0.70991	1.00633
GkPAGLNAARk	Unambiguous	40S ribosomal protein S23 [Schizosaccharomyces pombe 972h-]	1	1	19112979	K2(Label:13C(6)15N(2)); K11(Label:13C(6)15N(2))	HCD	1	0	1	1	1497			452782866	Heavy	Unique	Used	630853366	452782866	0.717731	1.01936
GkPAGLNAARk	Unambiguous	40S ribosomal protein S23 [Schizosaccharomyces pombe 972h-]	1	1	19112979	K2(Label:13C(6)15N(2)); K11(Label:13C(6)15N(2))	HCD	1	0	1	1	291			2.09303e+07	Heavy	Unique	Used	28275448	2.09303e+07	0.74023	1.05714
GkPAGLNAARk	Unambiguous	40S ribosomal protein S23 [Schizosaccharomyces pombe 972h-]	1	1	19112979	K2(Label:13C(6)15N(2)); K11(Label:13C(6)15N(2))	HCD	1	0	1	1	161			1.64605e+09	Heavy	Unique	Used	2210831126	1.64605e+09	0.744541	1.06442
GkPAGLNAARk	Unambiguous	40S ribosomal protein S23 [Schizosaccharomyces pombe 972h-]	1	1	19112979	K2(Label:13C(6)15N(2)); K11(Label:13C(6)15N(2))	HCD	1	0	1	1	3297			1.19439e+08	Heavy	Unique	Used	1.53615e+08	1.19439e+08	0.777522	1.12068
GkPAGLNAARk	Unambiguous	40S ribosomal protein S23 [Schizosaccharomyces pombe 972h-]	1	1	19112979	K2(Label:13C(6)15N(2)); K11(Label:13C(6)15N(2))	HCD	1	0	1	1	1498			510495558	Heavy	Unique	Used	6.55798e+08	510495558	0.778435	1.12225
GkPAGLNAARk	Unambiguous	40S ribosomal protein S23 [Schizosaccharomyces pombe 972h-]	1	1	19112979	K2(Label:13C(6)15N(2)); K11(Label:13C(6)15N(2))	HCD	1	0	1	1	3303			1.83671e+07	Heavy	Unique	Used	2.34579e+07	1.83671e+07	0.782984	1.13008
GkPAGLnAARk	Unambiguous	40S ribosomal protein S23 [Schizosaccharomyces pombe 972h-]	1	1	19112979	K2(Label:13C(6)15N(2)); N7(Deamidated); K11(Label:13C(6)15N(2))	HCD	1	0	1	1	174		1	222000490	Heavy	Unique	Used	187774064	154879472	0.824818	1.20297
GkPAGLnAARk	Unambiguous	40S ribosomal protein S23 [Schizosaccharomyces pombe 972h-]	1	1	19112979	K2(Label:13C(6)15N(2)); N7(Deamidated); K11(Label:13C(6)15N(2))	HCD	1	0	1	1	1515		1	52827613	Heavy	Unique	Used	39324092	36698888	0.933242	1.39922
GkPAGLNAARk	Unambiguous	40S ribosomal protein S23 [Schizosaccharomyces pombe 972h-]	1	1	19112979	K2(Label:13C(6)15N(2)); K11(Label:13C(6)15N(2))	HCD	1	0	1	1	3323	1		4.6022e+06	Heavy	Unique	Used	6095.98	3.42354e+06	561.606	-5.85513
KRLLGTAYK	Unambiguous	40S ribosomal protein S23 [Schizosaccharomyces pombe 972h-]	1	1	19112979		HCD	1	0	1	1	64			1.41418e+06	Light	Unique	Used	1.41418e+06	1.20043e+06	0.84885	1.24554
RLLGTAYK	Unambiguous	40S ribosomal protein S23 [Schizosaccharomyces pombe 972h-]	1	1	19112979		HCD	1	0	1	1	3696			938183866	Light	Unique	Used	938183866	696006145	0.741865	1.0599
RLLGTAYK	Unambiguous	40S ribosomal protein S23 [Schizosaccharomyces pombe 972h-]	1	1	19112979		HCD	1	0	1	1	1700			10613447488	Light	Unique	Used	10613447488	7935852910	0.747717	1.0698
RLLGTAYK	Unambiguous	40S ribosomal protein S23 [Schizosaccharomyces pombe 972h-]	1	1	19112979		HCD	1	0	1	1	3499			8.41963e+09	Light	Unique	Used	8418213818	6.31586e+09	0.750261	1.07411
RLLGTAYK	Unambiguous	40S ribosomal protein S23 [Schizosaccharomyces pombe 972h-]	1	1	19112979		HCD	1	0	1	1	127			4.85954e+08	Light	Unique	Used	4.85954e+08	3.65282e+08	0.751681	1.07652
RLLGTAYK	Unambiguous	40S ribosomal protein S23 [Schizosaccharomyces pombe 972h-]	1	1	19112979		HCD	1	0	1	1	1860			1189119906	Light	Unique	Used	1189119906	8.98149e+08	0.755306	1.08268
RLLGTAYK	Unambiguous	40S ribosomal protein S23 [Schizosaccharomyces pombe 972h-]	1	1	19112979		HCD	1	0	1	1	493			5.54984e+07	Light	Unique	Used	5.54984e+07	4.20187e+07	0.757117	1.08577
RLLGTAYK	Unambiguous	40S ribosomal protein S23 [Schizosaccharomyces pombe 972h-]	1	1	19112979		HCD	1	0	1	1	417			7.31245e+09	Light	Unique	Used	7310887061	5564098417	0.76107	1.0925
RLLGTAYK	Unambiguous	40S ribosomal protein S23 [Schizosaccharomyces pombe 972h-]	1	1	19112979		HCD	1	0	1	1	177			649901	Light	Unique	Used	649901	550021	0.846314	1.24103
RLLGTAYkSSPFGGSSHAk	Unambiguous	40S ribosomal protein S23 [Schizosaccharomyces pombe 972h-]	1	1	19112979	K8(Label:13C(6)15N(2)); K19(Label:13C(6)15N(2))	HCD	1	0	1	1	242			2.13236e+06	Heavy	Unique	Used	3.01934e+06	2.13236e+06	0.706232	1.00022
SSPFGGSSHAk	Unambiguous	40S ribosomal protein S23 [Schizosaccharomyces pombe 972h-]	1	1	19112979	K11(Label:13C(6)15N(2))	HCD	1	0	1	1	39			6.01159e+07	Heavy	Unique	Used	8.14165e+07	5.98713e+07	0.735371	1.04894
SSPFGGSSHAk	Unambiguous	40S ribosomal protein S23 [Schizosaccharomyces pombe 972h-]	1	1	19112979	K11(Label:13C(6)15N(2))	HCD	1	0	1	1	1570			9.11541e+08	Heavy	Unique	Used	1.22487e+09	9.11541e+08	0.744195	1.06384
SSPFGGSSHAk	Unambiguous	40S ribosomal protein S23 [Schizosaccharomyces pombe 972h-]	1	1	19112979	K11(Label:13C(6)15N(2))	HCD	1	0	1	1	1788			313899916	Heavy	Unique	Used	4.20701e+08	313899916	0.746136	1.06712
SSPFGGSSHAk	Unambiguous	40S ribosomal protein S23 [Schizosaccharomyces pombe 972h-]	1	1	19112979	K11(Label:13C(6)15N(2))	HCD	1	0	1	1	3398			329967883	Heavy	Unique	Used	436688459	329967883	0.755614	1.08321
SSPFGGSSHAK	Unambiguous	40S ribosomal protein S23 [Schizosaccharomyces pombe 972h-]	1	1	19112979		HCD	1	0	1	1	219			4863967882	Light	Unique	Used	4863967882	3680941472	0.756778	1.08519
SSPFGGSSHAK	Unambiguous	40S ribosomal protein S23 [Schizosaccharomyces pombe 972h-]	1	1	19112979		HCD	1	0	1	1	3393			1373982025	Light	Unique	Used	1373982025	1045556551	0.760968	1.09233
SSPFGGSSHAK	Unambiguous	40S ribosomal protein S23 [Schizosaccharomyces pombe 972h-]	1	1	19112979		HCD	1	0	1	1	3573			2.49449e+08	Light	Unique	Used	2.4793e+08	1.88996e+08	0.762298	1.0946
SSPFGGSSHAk	Unambiguous	40S ribosomal protein S23 [Schizosaccharomyces pombe 972h-]	1	1	19112979	K11(Label:13C(6)15N(2))	HCD	1	0	1	1	51			3.92198e+07	Heavy	Unique	Used	5.11639e+07	3.92198e+07	0.766552	1.10186
SSPFGGSSHAk	Unambiguous	40S ribosomal protein S23 [Schizosaccharomyces pombe 972h-]	1	1	19112979	K11(Label:13C(6)15N(2))	HCD	1	0	1	1	314			52874779	Heavy	Unique	Used	6.88665e+07	52874779	0.767787	1.10398
SSPFGGSSHAk	Unambiguous	40S ribosomal protein S23 [Schizosaccharomyces pombe 972h-]	1	1	19112979	K11(Label:13C(6)15N(2))	HCD	1	0	1	1	224			2.00037e+09	Heavy	Unique	Used	2585170900	2.00037e+09	0.773787	1.11426
SSPFGGSSHAk	Unambiguous	40S ribosomal protein S23 [Schizosaccharomyces pombe 972h-]	1	1	19112979	K11(Label:13C(6)15N(2))	HCD	1	0	1	1	1573			1.85951e+08	Heavy	Unique	Used	233104524	1.85951e+08	0.797715	1.15558
SSPFGGSSHAK	Unambiguous	40S ribosomal protein S23 [Schizosaccharomyces pombe 972h-]	1	1	19112979		HCD	1	0	1	1	162		1	376487	Light	Unique	Used	270783	216844	0.800803	1.16094
SSPFGGSSHAkGIVVEk	Unambiguous	40S ribosomal protein S23 [Schizosaccharomyces pombe 972h-]	1	1	19112979	K11(Label:13C(6)15N(2)); K17(Label:13C(6)15N(2))	HCD	1	0	1	1	551			5.09343e+06	Heavy	Unique	Used	8081516	5.09343e+06	0.630256	0.876372
SSPFGGSSHAkGIVVEk	Unambiguous	40S ribosomal protein S23 [Schizosaccharomyces pombe 972h-]	1	1	19112979	K11(Label:13C(6)15N(2)); K17(Label:13C(6)15N(2))	HCD	1	0	1	1	216			2.21453e+06	Heavy	Unique	Used	3.15807e+06	2.21453e+06	0.701229	0.991922
VAGVGLSALFHEK	Unambiguous	40S ribosomal protein S23 [Schizosaccharomyces pombe 972h-]	1	1	19112979		HCD	1	0	1	1	839			1.71928e+06	Light	Unique	Used	1.71928e+06	1.09247e+06	0.635423	0.884651
VAGVGLSALFHEk	Unambiguous	40S ribosomal protein S23 [Schizosaccharomyces pombe 972h-]	1	1	19112979	K13(Label:13C(6)15N(2))	HCD	1	0	1	1	2903			277004	Heavy	Unique	Used	421640	277004	0.65697	0.9194
VAGVGLSALFHEK	Unambiguous	40S ribosomal protein S23 [Schizosaccharomyces pombe 972h-]	1	1	19112979		HCD	1	0	1	1	4692		1	7.54316e+06	Light	Unique	Used	7.54316e+06	5.72517e+06	0.758988	1.08895
VAGVGLSALFHEK	Unambiguous	40S ribosomal protein S23 [Schizosaccharomyces pombe 972h-]	1	1	19112979		HCD	1	0	1	1	4643			6.92263e+09	Light	Unique	Used	6.92035e+09	5.26408e+09	0.760667	1.09181
VAGVGLSALFHEK	Unambiguous	40S ribosomal protein S23 [Schizosaccharomyces pombe 972h-]	1	1	19112979		HCD	1	0	1	1	1070			7.48925e+08	Light	Unique	Used	7.48925e+08	5.7248e+08	0.764403	1.09819
VAGVGLSALFHEK	Unambiguous	40S ribosomal protein S23 [Schizosaccharomyces pombe 972h-]	1	1	19112979		HCD	1	0	1	1	1071			3.26734e+08	Light	Unique	Used	3.26734e+08	2.5081e+08	0.767626	1.1037
VAGVGLSALFHEK	Unambiguous	40S ribosomal protein S23 [Schizosaccharomyces pombe 972h-]	1	1	19112979		HCD	1	0	1	1	743			4.38588e+08	Light	Unique	Used	438251464	3.36553e+08	0.767944	1.10425
VAGVGLSALFHEK	Unambiguous	40S ribosomal protein S23 [Schizosaccharomyces pombe 972h-]	1	1	19112979		HCD	1	0	1	1	745			1.77799e+08	Light	Unique	Used	1.77439e+08	1.36581e+08	0.769734	1.10731
VAGVGLSALFHEK	Unambiguous	40S ribosomal protein S23 [Schizosaccharomyces pombe 972h-]	1	1	19112979		HCD	1	0	1	1	4785			321032476	Light	Unique	Used	321032476	247204960	0.770031	1.10782
VAGVGLSALFHEk	Unambiguous	40S ribosomal protein S23 [Schizosaccharomyces pombe 972h-]	1	1	19112979	K13(Label:13C(6)15N(2))	HCD	1	0	1	1	4642			8.88218e+09	Heavy	Unique	Used	11458037572	8.88218e+09	0.775192	1.11667
VAGVGLSALFHEK	Unambiguous	40S ribosomal protein S23 [Schizosaccharomyces pombe 972h-]	1	1	19112979		HCD	1	0	1	1	2866			1.48217e+06	Light	Unique	Used	1.43433e+06	1.13361e+06	0.790343	1.14279
VAGVGLSALFHEk	Unambiguous	40S ribosomal protein S23 [Schizosaccharomyces pombe 972h-]	1	1	19112979	K13(Label:13C(6)15N(2))	HCD	1	0	1	1	2865			1.76798e+06	Heavy	Unique	Used	1.9801e+06	1.692e+06	0.854502	1.25563
VTAFVPHDGCLNFVDENDEVLLSGFGRk	Unambiguous	40S ribosomal protein S23 [Schizosaccharomyces pombe 972h-]	1	1	19112979	K28(Label:13C(6)15N(2))	HCD	1	0	1	1	882			16021159	Heavy	Unique	Used	2.378e+07	16021159	0.673723	0.946669
VVKVAGVGLSALFHEK	Unambiguous	40S ribosomal protein S23 [Schizosaccharomyces pombe 972h-]	1	1	19112979		HCD	1	0	1	1	1063			2.42947e+06	Light	Unique	Used	2.42947e+06	1.5424e+06	0.634871	0.883766
																						1.07652	=median(rak)
Unmodified P62
Sequence	PSM Ambiguity	Protein Descriptions	# Proteins	# Protein Groups	Protein Group Accessions	Modifications	Activation Type	ΔScore	ΔCn	Rank	Search Engine Rank	QuanResultID	# Missing Channels	# Single-Peak Channels	Precursor Area	Quan Channel	Quan Info	Quan Usage	Light	Heavy	H/L (pl)	pnl=(pl) / (med(rak))	pal	log2(pal)
QPNSAIRK	Unambiguous	40S ribosomal protein S23 [Schizosaccharomyces pombe 972h-]	1	1	19112979		HCD	1	0	1	1	151		1	3.34585e+07	Light	Unique	Used	23436912	3530560	0.150641	0.139933	0.174126	-2.5218
QPNSAIRK	Unambiguous	40S ribosomal protein S23 [Schizosaccharomyces pombe 972h-]	1	1	19112979		HCD	1	0	1	1	24		1	482195526	Light	Unique	Used	319583424	110142504	0.344644	0.320145	0.414381	-1.27097
QPNSAIRK	Unambiguous	40S ribosomal protein S23 [Schizosaccharomyces pombe 972h-]	1	1	19112979		HCD	1	0	1	1	3296		1	5.80953e+07	Light	Unique	Used	39978616	19623492	0.49085	0.455958	0.608601	-0.716432
QPNSAIRK	Unambiguous	40S ribosomal protein S23 [Schizosaccharomyces pombe 972h-]	1	1	19112979		HCD	1	0	1	1	3367	1		4.11573e+06	Light	Unique	Used	3.13244e+06	6095.98	0.00194608	0.00180775	0.00218479	-8.83829
QPNSAIRK	Unambiguous	40S ribosomal protein S23 [Schizosaccharomyces pombe 972h-]	1	1	19112979		HCD	1	0	1	1	1746	1		1.60789e+08	Light	Unique	Used	107569872	6095.98	5.667e-05	5.26416e-05	6.35979e-05	-13.9407
QPNSAIRK	Unambiguous	40S ribosomal protein S23 [Schizosaccharomyces pombe 972h-]	1	1	19112979		HCD	1	0	1	1	1536	1		2.92179e+07	Light	Unique	Used	19854110	6095.98	0.000307039	0.000285213	0.000344591	-11.5028
QPNSAIRK	Unambiguous	40S ribosomal protein S23 [Schizosaccharomyces pombe 972h-]	1	1	19112979		HCD	1	0	1	1	111	1		2.86655e+07	Light	Unique	Used	21749648	6521.7	0.000299853	0.000278538	0.000336526	-11.537
QPNSAIRK	Unambiguous	40S ribosomal protein S23 [Schizosaccharomyces pombe 972h-]	1	1	19112979		HCD	1	0	1	1	1489			1.0317e+09	Light	Unique	Used	958141088	1.95359e+07	0.0203894	0.01894	0.0229722	-5.44396
Monohydroxylated P62
Sequence	PSM Ambiguity	Protein Descriptions	# Proteins	# Protein Groups	Protein Group Accessions	Modifications	Activation Type	ΔScore	ΔCn	Rank	Search Engine Rank	QuanResultID	# Missing Channels	# Single-Peak Channels	Precursor Area	Quan Channel	Quan Info	Quan Usage	Light	Heavy	H/L (pl)	pnl=(pl) / (med(rak))	pal	log2(pal)
QpNSAIRK	Unambiguous	40S ribosomal protein S23 [Schizosaccharomyces pombe 972h-]	1	1	19112979	P2(Oxidation)	HCD	1	0	1	1	1345			245053627	Light	Unique	Used	228646364	10412377	0.0455392	0.0423021	0.0515597	-4.27761
QpNSAIRK	Unambiguous	40S ribosomal protein S23 [Schizosaccharomyces pombe 972h-]	1	1	19112979	P2(Oxidation)	HCD	1	0	1	1	1395		1	4.78094e+07	Light	Unique	Used	32780352	1911383	0.0583088	0.054164	0.0661823	-3.91741
Dihydroxylated P62
Sequence	PSM Ambiguity	Protein Descriptions	# Proteins	# Protein Groups	Protein Group Accessions	Modifications	Activation Type	ΔScore	ΔCn	Rank	Search Engine Rank	QuanResultID	# Missing Channels	# Single-Peak Channels	Precursor Area	Quan Channel	Quan Info	Quan Usage	Light	Heavy	H/L (pl)	pnl=(pl) / (med(rak))	pal	log2(pal)
QpNSAIRk	Unambiguous	40S ribosomal protein S23 [Schizosaccharomyces pombe 972h-]	1	1	19112979	P2(Dioxidation); K8(Label:13C(6)15N(2))	HCD	1	0	1	1	147			2.02612e+06	Heavy	Unique	Used	734448	2.02612e+06	2.7587	2.5626	6.63384	2.72984
QpNSAIRk	Unambiguous	40S ribosomal protein S23 [Schizosaccharomyces pombe 972h-]	1	1	19112979	P2(Dioxidation); K8(Label:13C(6)15N(2))	HCD	1	0	1	1	17			2.6575e+08	Heavy	Unique	Used	9.10746e+07	2.6575e+08	2.91793	2.71051	7.51227	2.90925
QpNSAIRK	Unambiguous	40S ribosomal protein S23 [Schizosaccharomyces pombe 972h-]	1	1	19112979	P2(Dioxidation)	HCD	1	0	1	1	11			46440728	Light	Unique	Used	46440728	150655204	3.24403	3.01343	9.76391	3.28746
QpNSAIRk	Unambiguous	40S ribosomal protein S23 [Schizosaccharomyces pombe 972h-]	1	1	19112979	P2(Dioxidation); K8(Label:13C(6)15N(2))	HCD	1	0	1	1	1340			342624178	Heavy	Unique	Used	102463978	335505518	3.27438	3.04162	10.0128	3.32377
QpNSAIRK	Unambiguous	40S ribosomal protein S23 [Schizosaccharomyces pombe 972h-]	1	1	19112979	P2(Dioxidation)	HCD	1	0	1	1	106		1	6260396	Light	Unique	Used	6260396	21182084	3.38351	3.14299	10.9775	3.45648
QpNSAIRK	Unambiguous	40S ribosomal protein S23 [Schizosaccharomyces pombe 972h-]	1	1	19112979	P2(Dioxidation)	HCD	1	0	1	1	1388			2.23495e+07	Light	Unique	Used	2.23495e+07	8.2899e+07	3.70921	3.44554	14.7124	3.87897

## Sheet: ofd1Δ (H) alone
Sequence	PSM Ambiguity	Protein Descriptions	# Proteins	# Protein Groups	Protein Group Accessions	Modifications	Activation Type	ΔScore	ΔCn	Rank	Search Engine Rank	QuanResultID	# Missing Channels	# Single-Peak Channels	Precursor Area	Quan Channel	Quan Info	Quan Usage	Light	Heavy	H/L (sj)	snj	log2(snj)
VGALPPTWK	Unambiguous	40S ribosomal protein S13 [Schizosaccharomyces pombe 972h-]	1	1	19114812		HCD	1	0	1	1	1453	1	1	115105504	Light	Unique	Used	115105504	4123.69	3.58253e-05	2.56012e-05	-15.2534
VGALPPTWK	Unambiguous	40S ribosomal protein S13 [Schizosaccharomyces pombe 972h-]	1	1	19114812		HCD	1	0	1	1	1465	1	1	108669800	Light	Unique	Used	108669800	4123.69	3.79469e-05	2.71173e-05	-15.1704
VGALPPTWK	Unambiguous	40S ribosomal protein S13 [Schizosaccharomyces pombe 972h-]	1	1	19114812		HCD	1	0	1	1	3543	1		4.943e+07	Light	Unique	Used	34923864	4123.69	0.000118076	8.43769e-05	-13.5328
WQSTIEANQTIK	Unambiguous	40S ribosomal protein S1 [Schizosaccharomyces pombe 972h-]	1	1	19113740		HCD	1	0	1	1	3317	1		41202540	Light	Unique	Used	20843182	4123.69	0.000197843	0.000141375	-12.7882
VGALPPTWK	Unambiguous	40S ribosomal protein S13 [Schizosaccharomyces pombe 972h-]	1	1	19114812		HCD	1	0	1	1	5119	1		32478341	Light	Unique	Used	18311468	4123.69	0.000225197	0.00016092	-12.6014
VFLDNRDANTVDYK	Unambiguous	40S ribosomal protein S7 [Schizosaccharomyces pombe 972h-]	1	1	19114589		HCD	1	0	1	1	5068	1		9.21609e+06	Light	Unique	Used	3.56805e+06	4123.69	0.00115573	0.000825633	-10.2422
EVATAIRGAIImGK	Unambiguous	40S ribosomal protein S2 [Schizosaccharomyces pombe 972h-]	1	1	19075935	M12(Oxidation)	HCD	1	0	1	1	5914	1		3.03434e+06	Light	Unique	Used	1.47858e+06	4123.69	0.00278894	0.00199145	-8.97196
VGALPPTWK	Unambiguous	40S ribosomal protein S13 [Schizosaccharomyces pombe 972h-]	1	1	19114812		HCD	1	0	1	1	1734	1		2.46577e+06	Light	Unique	Used	1.38099e+06	4123.69	0.00298603	0.00213206	-8.87354
VGALPPTWK	Unambiguous	40S ribosomal protein S13 [Schizosaccharomyces pombe 972h-]	1	1	19114812		HCD	1	0	1	1	1577	1		684573	Light	Unique	Used	396330	4123.69	0.0104047	0.00741337	-7.07565
ImLPEPk	Unambiguous	40S ribosomal protein S3 [Schizosaccharomyces pombe 972h-]	1	1	19113555	M2(Oxidation); K7(Label:13C(6)15N(2))	HCD	1	0	1	1	1128			765086	Heavy	Unique	Used	4.28921e+07	765086	0.0178374	0.0126824	-6.30103
ANGLAPELPEDLYNLIK	Unambiguous	40S ribosomal protein S13 [Schizosaccharomyces pombe 972h-]	1	1	19114812		HCD	1	0	1	1	4732	1		262996	Light	Unique	Used	116067	4123.69	0.0355285	0.0251346	-5.31418
RIQRGPVRGISFk	Unambiguous	40S ribosomal protein S17 [Schizosaccharomyces pombe 972h-]	2	2	19075512;19112037	K13(Label:13C(6)15N(2))	HCD	1	0	1	1	4880		1	1.46876e+08	Heavy	Not Unique	Used	486262944	72638032	0.14938	0.102385	-3.28792
ATSTPNPk	Unambiguous	40S ribosomal protein S8 [Schizosaccharomyces pombe 972h-]	1	1	19115431	K8(Label:13C(6)15N(2))	HCD	1	0	1	1	125		1	842416	Heavy	Unique	Used	4.05214e+06	675942	0.166811	0.11379	-3.13556
LQEEERERK	Unambiguous	40S ribosomal protein S17 [Schizosaccharomyces pombe 972h-]	2	2	19075512;19112037		HCD	1	0	1	1	57	1		36921.2	Light	Not Unique	Used	22256.6	4123.69	0.185279	0.125755	-2.99131
APAFFEVk	Unambiguous	40S ribosomal protein S1 [Schizosaccharomyces pombe 972h-]	2	2	19114028;19113740	K8(Label:13C(6)15N(2))	HCD	1	0	1	1	1776		1	927420	Heavy	Not Unique	Used	4.57809e+06	927420	0.202578	0.136854	-2.86929
TDASAVQAFGLRTHYGGGRTTGFALIYDDVEAMk	Unambiguous	40S ribosomal protein S24 [Schizosaccharomyces pombe 972h-]	1	1	19115165	K34(Label:13C(6)15N(2))	HCD	1	0	1	1	6623		1	1.03077e+06	Heavy	Unique	Used	1.87086e+06	480081	0.25661	0.170866	-2.54906
VTAFVpHDGCLnFVDENDEVLLSGFGRk	Unambiguous	40S ribosomal protein S23 [Schizosaccharomyces pombe 972h-]	1	1	19112979	P6(Dioxidation); N12(Deamidated); K28(Label:13C(6)15N(2))	HCD	0.0508	0	1	1	6450			2.39195e+07	Heavy	Unique	Used	64110652	2.39195e+07	0.373097	0.240966	-2.0531
EVATAIRGAIImGk	Unambiguous	40S ribosomal protein S2 [Schizosaccharomyces pombe 972h-]	1	1	19075935	M12(Oxidation); K14(Label:13C(6)15N(2))	HCD	1	0	1	1	3456		1	18383410	Heavy	Unique	Used	35817740	18383410	0.513249	0.319919	-1.64422
TLVNRTAGLk	Unambiguous	40S ribosomal protein S1 [Schizosaccharomyces pombe 972h-]	2	2	19114028;19113740	K10(Label:13C(6)15N(2))	HCD	1	0	1	1	5491		1	1.58574e+06	Heavy	Not Unique	Used	2998260	1.58574e+06	0.528886	0.328388	-1.60653
YYPRLTLDFQTnk	Unambiguous	40S ribosomal protein S17 [Schizosaccharomyces pombe 972h-]	2	2	19075512;19112037	N12(Deamidated); K13(Label:13C(6)15N(2))	HCD	1	0	1	1	4104			1.74945e+07	Heavy	Not Unique	Used	2.2617e+07	1.67928e+07	0.742487	0.437825	-1.19158
VmFAmTQIk	Unambiguous	40S ribosomal protein S18 [Schizosaccharomyces pombe 972h-]	1	1	19113298	M2(Oxidation); M5(Oxidation); K9(Label:13C(6)15N(2))	HCD	1	0	1	1	1089		1	4.30172e+06	Heavy	Unique	Used	2695378	2.09218e+06	0.776211	0.454105	-1.1389
RTRQATDGRk	Unambiguous	40S ribosomal protein S7 [Schizosaccharomyces pombe 972h-]	1	1	19114589	K10(Label:13C(6)15N(2))	HCD	1	0	1	1	11			6635724	Heavy	Unique	Used	8.12074e+06	6635724	0.817132	0.473518	-1.07851
MTTPQWIDIVk	Unambiguous	40S ribosomal protein S19 [Schizosaccharomyces pombe 972h-]	2	2	19113385;19112013	K11(Label:13C(6)15N(2))	HCD	1	0	1	1	4438		1	8.42229e+06	Heavy	Not Unique	Used	7087077	6.43702e+06	0.908276	0.515462	-0.956062
AILmQRLIQVDGk	Unambiguous	40S ribosomal protein S4 [Schizosaccharomyces pombe 972h-]	1	1	19112469	M4(Oxidation); K13(Label:13C(6)15N(2))	HCD	1	0	1	1	1503		1	1.72424e+06	Heavy	Unique	Used	1.79214e+06	1.72424e+06	0.962109	0.539432	-0.890487
VGALPPTWK	Unambiguous	40S ribosomal protein S13 [Schizosaccharomyces pombe 972h-]	1	1	19114812		HCD	1	0	1	1	4023		1	4237921	Light	Unique	Used	4237921	4125622	0.973501	0.544431	-0.87718
SFQLLANNVDSk	Unambiguous	40S ribosomal protein S18 [Schizosaccharomyces pombe 972h-]	1	1	19113298	K12(Label:13C(6)15N(2))	HCD	1	0	1	1	4800			218825	Heavy	Unique	Used	207821	218825	1.05295	0.578597	-0.789369
ATSTPNPk	Unambiguous	40S ribosomal protein S8 [Schizosaccharomyces pombe 972h-]	1	1	19115431	K8(Label:13C(6)15N(2))	HCD	1	0	1	1	65			1.77488e+06	Heavy	Unique	Used	1.67218e+06	1.77488e+06	1.06142	0.582167	-0.780496
RAGELTTEELERIVTIIQNPSQFk	Unambiguous	40S ribosomal protein S18 [Schizosaccharomyces pombe 972h-]	1	1	19113298	K24(Label:13C(6)15N(2))	HCD	1	0	1	1	4777		1	73570.3	Heavy	Unique	Used	69196	73570.3	1.06322	0.582924	-0.778619
DQYVPEVSELEVDRVNVDQDTk	Unambiguous	40S ribosomal protein S17 [Schizosaccharomyces pombe 972h-]	1	1	19112037	K22(Label:13C(6)15N(2))	HCD	1	0	1	1	4712		1	114323	Heavy	Unique	Used	60924.8	68820.2	1.12959	0.610445	-0.712067
RLLGTAYkSSPFGGSSHAk	Unambiguous	40S ribosomal protein S23 [Schizosaccharomyces pombe 972h-]	1	1	19112979	K8(Label:13C(6)15N(2)); K19(Label:13C(6)15N(2))	HCD	1	0	1	1	2846			1.61614e+07	Heavy	Unique	Used	8.74117e+06	12084932	1.38253	0.708462	-0.497237
VmFAMTQIk	Unambiguous	40S ribosomal protein S18 [Schizosaccharomyces pombe 972h-]	1	1	19113298	M2(Oxidation); K9(Label:13C(6)15N(2))	HCD	1	0	1	1	3838		1	6.90109e+06	Heavy	Unique	Used	3.38941e+06	4.75255e+06	1.40218	0.715652	-0.48267
TDASAVqAFGLRTHYGGGRTTGFALIYDDVEAMk	Unambiguous	40S ribosomal protein S24 [Schizosaccharomyces pombe 972h-]	1	1	19115165	Q7(Deamidated); K34(Label:13C(6)15N(2))	HCD	1	0	1	1	7000			5.15582e+06	Heavy	Unique	Used	3.15718e+06	4.51638e+06	1.43051	0.725922	-0.462114
DELERVAk	Unambiguous	40S ribosomal protein S5 [Schizosaccharomyces pombe 972h-]	2	1	19115124	K8(Label:13C(6)15N(2))	HCD	1	0	1	1	2611			1.30363e+08	Heavy	Unique	Used	89193536	129350796	1.45023	0.732998	-0.44812
DQYVPEVSELEVDRVNVDQDTk	Unambiguous	40S ribosomal protein S17 [Schizosaccharomyces pombe 972h-]	1	1	19112037	K22(Label:13C(6)15N(2))	HCD	1	0	1	1	4559			1.09589e+07	Heavy	Unique	Used	7.37006e+06	1.09589e+07	1.48695	0.746029	-0.422696
TRIIQVAYHPSNnELVRTNTLTk	Unambiguous	40S ribosomal protein S8 [Schizosaccharomyces pombe 972h-]	2	1	19115431	N13(Deamidated); K23(Label:13C(6)15N(2))	HCD	0.0492	0	1	1	5117			2.89905e+07	Heavy	Unique	Used	1.9427e+07	2.89905e+07	1.49228	0.747905	-0.419073
EWVPVTK	Unambiguous	40S ribosomal protein S2 [Schizosaccharomyces pombe 972h-]	1	1	19075935		HCD	1	0	1	1	1175			1.42872e+07	Light	Unique	Used	13676123	20648331	1.50981	0.754044	-0.407278
TDASAVQAFGLRTHYGGGRTTGFALIYDDVEAmk	Unambiguous	40S ribosomal protein S24 [Schizosaccharomyces pombe 972h-]	1	1	19115165	M33(Oxidation); K34(Label:13C(6)15N(2))	HCD	1	0	1	1	6578			1.56741e+07	Heavy	Unique	Used	9.09111e+06	1.37593e+07	1.51348	0.755326	-0.404828
InVDQDTk	Unambiguous	40S ribosomal protein S17 [Schizosaccharomyces pombe 972h-]	1	1	19075512	N2(Deamidated); K8(Label:13C(6)15N(2))	HCD	1	0	1	1	5467			731974	Heavy	Unique	Used	441830	678940	1.53666	0.763365	-0.389555
TDASAVQAFGLRTHYGGGRTTGFALIYDDVEAmk	Unambiguous	40S ribosomal protein S24 [Schizosaccharomyces pombe 972h-]	1	1	19115165	M33(Oxidation); K34(Label:13C(6)15N(2))	HCD	1	0	1	1	4775			1.08237e+06	Heavy	Unique	Used	702707	1.08237e+06	1.54028	0.764616	-0.387192
DQYVPEVSELEVDRVNVDQDTk	Unambiguous	40S ribosomal protein S17 [Schizosaccharomyces pombe 972h-]	1	1	19112037	K22(Label:13C(6)15N(2))	HCD	1	0	1	1	4635		1	4.01397e+06	Heavy	Unique	Used	2.55667e+06	4.01397e+06	1.57	0.774804	-0.368097
THLRNmIILPEMVGSVVGIYNGK	Unambiguous	40S ribosomal protein S15 [Schizosaccharomyces pombe 972h-]	2	1	19075461	M6(Oxidation)	HCD	0.5843	0	1	1	4367			58234545	Light	Unique	Used	48601682	76624008	1.57657	0.777041	-0.363937
FmTnRLLQRk	Unambiguous	40S ribosomal protein S24 [Schizosaccharomyces pombe 972h-]	2	2	19112688;19115165	M2(Oxidation); N4(Deamidated); K10(Label:13C(6)15N(2))	HCD	1	0	1	1	2716			72399322	Heavy	Not Unique	Used	45724964	72399322	1.58337	0.779347	-0.359661
TDASAVQAFGLRTHYGGGRTTGFALIYDDVEAMk	Unambiguous	40S ribosomal protein S24 [Schizosaccharomyces pombe 972h-]	1	1	19115165	K34(Label:13C(6)15N(2))	HCD	1	0	1	1	4784			423415	Heavy	Unique	Used	249487	395426	1.58495	0.779885	-0.358666
QPNSAIRk	Unambiguous	40S ribosomal protein S23 [Schizosaccharomyces pombe 972h-]	1	1	19112979	K8(Label:13C(6)15N(2))	HCD	1	0	1	1	2426			1.31367e+07	Heavy	Unique	Used	8.17403e+06	1.31367e+07	1.60712	0.787363	-0.344898
LGSFSSVYHk	Unambiguous	40S ribosomal protein S7 [Schizosaccharomyces pombe 972h-]	1	1	19114589	K10(Label:13C(6)15N(2))	HCD	1	0	1	1	3036			6.32465e+08	Heavy	Unique	Used	3.92359e+08	6.32465e+08	1.61195	0.788985	-0.34193
TDASAVQAFGLRTHYGGGRTTGFALIYDDVEAMk	Unambiguous	40S ribosomal protein S24 [Schizosaccharomyces pombe 972h-]	1	1	19115165	K34(Label:13C(6)15N(2))	HCD	1	0	1	1	4576		1	1098262	Heavy	Unique	Used	677845	1098262	1.62023	0.791754	-0.336875
QLEDGRTLSDYNIQk	Unambiguous	ubiquitin-40S ribosomal protein S31 fusion protein [Schizosaccharomyces pombe 972h-]	4	1	19114970	K15(Label:13C(6)15N(2))	HCD	1	0	1	1	3313			57312873	Heavy	Unique	Used	3.52473e+07	57312873	1.62602	0.793689	-0.333355
TDASAVQAFGLRTHYGGGRTTGFALIYDDVEAMk	Unambiguous	40S ribosomal protein S24 [Schizosaccharomyces pombe 972h-]	1	1	19115165	K34(Label:13C(6)15N(2))	HCD	1	0	1	1	4795		1	332664	Heavy	Unique	Used	51092.3	83363.5	1.63163	0.795555	-0.329966
QLEDGRTLSDYNIQk	Unambiguous	ubiquitin-40S ribosomal protein S31 fusion protein [Schizosaccharomyces pombe 972h-]	4	1	19114970	K15(Label:13C(6)15N(2))	HCD	1	0	1	1	1284			1.85519e+07	Heavy	Unique	Used	1.13477e+07	1.85519e+07	1.63487	0.796633	-0.328013
TDASAVqAFGLRTHYGGGRTTGFALIYDDVEAmk	Unambiguous	40S ribosomal protein S24 [Schizosaccharomyces pombe 972h-]	1	1	19115165	Q7(Deamidated); M33(Oxidation); K34(Label:13C(6)15N(2))	HCD	1	0	1	1	6592		1	4927075	Heavy	Unique	Used	1714754	2.81814e+06	1.64347	0.799485	-0.322858
AILmQRLIQVDGk	Unambiguous	40S ribosomal protein S4 [Schizosaccharomyces pombe 972h-]	1	1	19112469	M4(Oxidation); K13(Label:13C(6)15N(2))	HCD	1	0	1	1	1500			1.74753e+07	Heavy	Unique	Used	8.89222e+06	14645790	1.64703	0.800666	-0.320728
GDIPGVRFk	Unambiguous	40S ribosomal protein S23 [Schizosaccharomyces pombe 972h-]	1	1	19112979	K9(Label:13C(6)15N(2))	HCD	1	0	1	1	5780			6.1468e+07	Heavy	Unique	Used	3.72014e+07	6.13765e+07	1.64985	0.801595	-0.319055
GkPAGLnAARk	Unambiguous	40S ribosomal protein S23 [Schizosaccharomyces pombe 972h-]	1	1	19112979	K2(Label:13C(6)15N(2)); N7(Deamidated); K11(Label:13C(6)15N(2))	HCD	1	0	1	1	280			1.11504e+07	Heavy	Unique	Used	6.7379e+06	1.11504e+07	1.65487	0.803254	-0.316071
VFLDNRDANTVDYk	Unambiguous	40S ribosomal protein S7 [Schizosaccharomyces pombe 972h-]	1	1	19114589	K14(Label:13C(6)15N(2))	HCD	1	0	1	1	3369			5.15686e+06	Heavy	Unique	Used	3.10192e+06	5.15686e+06	1.66248	0.805757	-0.311584
VLAVDLLNPSHESEmRk	Unambiguous	40S ribosomal protein S27 [Schizosaccharomyces pombe 972h-]	1	1	19112006	M15(Oxidation); K17(Label:13C(6)15N(2))	HCD	1	0	1	1	3695			5.0728e+07	Heavy	Unique	Used	3.04656e+07	5.0728e+07	1.66509	0.806616	-0.310046
VGALPPTWk	Unambiguous	40S ribosomal protein S13 [Schizosaccharomyces pombe 972h-]	1	1	19114812	K9(Label:13C(6)15N(2))	HCD	1	0	1	1	1782		1	951655	Heavy	Unique	Used	298023	497608	1.6697	0.808127	-0.307345
ADADSVVEQILk	Unambiguous	40S ribosomal protein S13 [Schizosaccharomyces pombe 972h-]	1	1	19114812	K12(Label:13C(6)15N(2))	HCD	1	0	1	1	4799			452339	Heavy	Unique	Used	263577	440362	1.67071	0.80846	-0.306752
TDASAVqAFGLRTHYGGGRTTGFALIYDDVEAMk	Unambiguous	40S ribosomal protein S24 [Schizosaccharomyces pombe 972h-]	1	1	19115165	Q7(Deamidated); K34(Label:13C(6)15N(2))	HCD	1	0	1	1	5327			3.10167e+07	Heavy	Unique	Used	1.85123e+07	3.10167e+07	1.67546	0.810015	-0.303979
VTAFVpHDGCLNFVDENDEVLLSGFGRk	Unambiguous	40S ribosomal protein S23 [Schizosaccharomyces pombe 972h-]	1	1	19112979	P6(Dioxidation); K28(Label:13C(6)15N(2))	HCD	1	0	1	1	4497			2.57278e+07	Heavy	Unique	Used	1.15876e+07	19420593	1.67598	0.810186	-0.303676
TDASAVQAFGLRTHYGGGRTTGFALIYDDVEAMk	Unambiguous	40S ribosomal protein S24 [Schizosaccharomyces pombe 972h-]	1	1	19115165	K34(Label:13C(6)15N(2))	HCD	1	0	1	1	4766		1	2.88351e+06	Heavy	Unique	Used	208840	350148	1.67663	0.810396	-0.303301
GRRIRELTALVQk	Unambiguous	40S ribosomal protein S3 [Schizosaccharomyces pombe 972h-]	1	1	19113555	K13(Label:13C(6)15N(2))	HCD	1	0	1	1	5672			3.24666e+06	Heavy	Unique	Used	1.87757e+06	3.15101e+06	1.67824	0.810922	-0.302365
THLRNMIILPEMVGSVVGIYnGK	Unambiguous	40S ribosomal protein S15 [Schizosaccharomyces pombe 972h-]	2	1	19075461	N21(Deamidated)	HCD	1	0	1	1	4564			7.987e+06	Light	Unique	Used	7.987e+06	1.3513e+07	1.69188	0.815367	-0.294478
TDASAVQAFGLRTHYGGGRTTGFALIYDDVEAmk	Unambiguous	40S ribosomal protein S24 [Schizosaccharomyces pombe 972h-]	1	1	19115165	M33(Oxidation); K34(Label:13C(6)15N(2))	HCD	1	0	1	1	4196			2.28134e+08	Heavy	Unique	Used	134147013	2.28134e+08	1.70063	0.818205	-0.289465
ALITYDRTLLVADPRRmEPk	Unambiguous	40S ribosomal protein S16 [Schizosaccharomyces pombe 972h-]	1	1	19112530	M17(Oxidation); K20(Label:13C(6)15N(2))	HCD	1	0	1	1	6830			4.89103e+07	Heavy	Unique	Used	17775462	30431487	1.71199	0.82188	-0.283001
FAGVDIRVRVSGGGHVSQIYAIRQAISk	Unambiguous	40S ribosomal protein S16 [Schizosaccharomyces pombe 972h-]	1	1	19112530	K28(Label:13C(6)15N(2))	HCD	1	0	1	1	4681		1	2.87298e+06	Heavy	Unique	Used	853139	1.46612e+06	1.71851	0.823977	-0.279324
RIVDEVAIIASk	Unambiguous	40S ribosomal protein S17 [Schizosaccharomyces pombe 972h-]	2	2	19075512;19112037	K12(Label:13C(6)15N(2))	HCD	1	0	1	1	1697			2.53252e+06	Heavy	Not Unique	Used	1.4725e+06	2.53252e+06	1.71988	0.824419	-0.27855
VTAFVpHDGCLNFVDENDEVLLSGFGRk	Unambiguous	40S ribosomal protein S23 [Schizosaccharomyces pombe 972h-]	1	1	19112979	P6(Dioxidation); K28(Label:13C(6)15N(2))	HCD	1	0	1	1	6451			2.44368e+07	Heavy	Unique	Used	6.7636e+06	11654038	1.72305	0.825438	-0.276768
RLIDLHSPSEIVK	Unambiguous	40S ribosomal protein S20 [Schizosaccharomyces pombe 972h-]	1	1	19075936		HCD	1	0	1	1	3531			4.98191e+07	Light	Unique	Used	41687808	71965498	1.7263	0.82648	-0.274949
TDASAVQAFGLRTHYGGGRTTGFALIYDDVEAmk	Unambiguous	40S ribosomal protein S24 [Schizosaccharomyces pombe 972h-]	1	1	19115165	M33(Oxidation); K34(Label:13C(6)15N(2))	HCD	1	0	1	1	4663		1	2.70133e+07	Heavy	Unique	Used	2.19142e+06	3817648	1.74209	0.831531	-0.266158
VLAVDLLNPSHESEmRK	Unambiguous	40S ribosomal protein S27 [Schizosaccharomyces pombe 972h-]	1	1	19112006	M15(Oxidation)	HCD	1	0	1	1	1602			1.32196e+07	Light	Unique	Used	1.32196e+07	2.33267e+07	1.76456	0.838663	-0.253837
VFLDNRDANTVDYk	Unambiguous	40S ribosomal protein S7 [Schizosaccharomyces pombe 972h-]	1	1	19114589	K14(Label:13C(6)15N(2))	HCD	1	0	1	1	3243			8.66937e+08	Heavy	Unique	Used	4.87545e+08	8.66937e+08	1.77817	0.842954	-0.246474
TRIIQVAYHPSNnELVRTNTLTk	Unambiguous	40S ribosomal protein S8 [Schizosaccharomyces pombe 972h-]	2	1	19115431	N13(Deamidated); K23(Label:13C(6)15N(2))	HCD	0.5769	0	1	1	5121		1	3.58845e+07	Heavy	Unique	Used	4.94847e+06	8892438	1.79701	0.848857	-0.236407
TDASAVQAFGLRTHYGGGRTTGFALIYDDVEAMk	Unambiguous	40S ribosomal protein S24 [Schizosaccharomyces pombe 972h-]	1	1	19115165	K34(Label:13C(6)15N(2))	HCD	1	0	1	1	7006			7.26996e+06	Heavy	Unique	Used	4.0085e+06	7.26996e+06	1.81363	0.854033	-0.227637
TDASAVQAFGLRTHYGGGRTTGFALIYDDVEAmk	Unambiguous	40S ribosomal protein S24 [Schizosaccharomyces pombe 972h-]	1	1	19115165	M33(Oxidation); K34(Label:13C(6)15N(2))	HCD	1	0	1	1	6308			5.96408e+08	Heavy	Unique	Used	3.26492e+08	592994586	1.81626	0.854847	-0.226262
AILmQRLIQVDGk	Unambiguous	40S ribosomal protein S4 [Schizosaccharomyces pombe 972h-]	1	1	19112469	M4(Oxidation); K13(Label:13C(6)15N(2))	HCD	1	0	1	1	1514			3.7694e+06	Heavy	Unique	Used	2.07103e+06	3.7694e+06	1.82006	0.856024	-0.224276
TDASAVQAFGLRTHYGGGRTTGFALIYDDVEAmk	Unambiguous	40S ribosomal protein S24 [Schizosaccharomyces pombe 972h-]	1	1	19115165	M33(Oxidation); K34(Label:13C(6)15N(2))	HCD	1	0	1	1	4189			1454768476	Heavy	Unique	Used	785975546	1444643970	1.83803	0.861567	-0.214965
FEPHYRLVRVGHAEPIQk	Unambiguous	40S ribosomal protein S24 [Schizosaccharomyces pombe 972h-]	1	1	19115165	K18(Label:13C(6)15N(2))	HCD	1	0	1	1	2932			9.4098e+07	Heavy	Unique	Used	5.11706e+07	9.4098e+07	1.83891	0.861838	-0.214512
TDASAVQAFGLRTHYGGGRTTGFALIYDDVEAmk	Unambiguous	40S ribosomal protein S24 [Schizosaccharomyces pombe 972h-]	1	1	19115165	M33(Oxidation); K34(Label:13C(6)15N(2))	HCD	1	0	1	1	6293			4.73866e+07	Heavy	Unique	Used	2.56836e+07	4.73866e+07	1.84501	0.863712	-0.211378
TRIIQVAYHPSnNELVRTNTLTk	Unambiguous	40S ribosomal protein S8 [Schizosaccharomyces pombe 972h-]	2	1	19115431	N12(Deamidated); K23(Label:13C(6)15N(2))	HCD	0.1692	0	1	1	5120			1.37426e+08	Heavy	Unique	Used	7.39847e+07	136552661	1.84569	0.86392	-0.211031
EWVPVTK	Unambiguous	40S ribosomal protein S2 [Schizosaccharomyces pombe 972h-]	1	1	19075935		HCD	1	0	1	1	1101			1.04523e+08	Light	Unique	Used	1.04411e+08	1.92896e+08	1.84746	0.864463	-0.210123
ANGLAPELPEDLYnLIk	Unambiguous	40S ribosomal protein S13 [Schizosaccharomyces pombe 972h-]	1	1	19114812	N14(Deamidated); K17(Label:13C(6)15N(2))	HCD	1	0	1	1	4595		1	8.00115e+06	Heavy	Unique	Used	4.32889e+06	8.00115e+06	1.84831	0.864724	-0.209689
TDASAVQAFGLRTHYGGGRTTGFALIYDDVEAMk	Unambiguous	40S ribosomal protein S24 [Schizosaccharomyces pombe 972h-]	1	1	19115165	K34(Label:13C(6)15N(2))	HCD	1	0	1	1	4374			1070634635	Heavy	Unique	Used	573714040	1061275886	1.84983	0.865189	-0.208912
FEPHYRLVRVGHAEPIQk	Unambiguous	40S ribosomal protein S24 [Schizosaccharomyces pombe 972h-]	1	1	19115165	K18(Label:13C(6)15N(2))	HCD	1	0	1	1	4955			6.5591e+08	Heavy	Unique	Used	3.54465e+08	6.5591e+08	1.85042	0.86537	-0.208612
GPVRLPTk	Unambiguous	40S ribosomal protein S20 [Schizosaccharomyces pombe 972h-]	1	1	19075936	K8(Label:13C(6)15N(2))	HCD	1	0	1	1	435			1.43299e+08	Heavy	Unique	Used	77198436	143003962	1.85242	0.865981	-0.207593
TDASAVQAFGLRTHYGGGRTTGFALIYDDVEAmk	Unambiguous	40S ribosomal protein S24 [Schizosaccharomyces pombe 972h-]	1	1	19115165	M33(Oxidation); K34(Label:13C(6)15N(2))	HCD	1	0	1	1	6316			1.63938e+06	Heavy	Unique	Used	883926	1.63938e+06	1.85466	0.866664	-0.206456
TDASAVQAFGLRTHYGGGRTTGFALIYDDVEAMk	Unambiguous	40S ribosomal protein S24 [Schizosaccharomyces pombe 972h-]	1	1	19115165	K34(Label:13C(6)15N(2))	HCD	1	0	1	1	6377			1.04846e+09	Heavy	Unique	Used	559077546	1039713383	1.85969	0.868202	-0.203897
TDASAVQAFGLRTHYGGGRTTGFALIYDDVEAMk	Unambiguous	40S ribosomal protein S24 [Schizosaccharomyces pombe 972h-]	1	1	19115165	K34(Label:13C(6)15N(2))	HCD	1	0	1	1	6938			1.32095e+09	Heavy	Unique	Used	705196160	1311882754	1.86031	0.86839	-0.203586
NREEAAEFAQLMAk	Unambiguous	40S ribosomal protein S6 [Schizosaccharomyces pombe 972h-]	2	1	19113745	K14(Label:13C(6)15N(2))	HCD	1	0	1	1	6117			9.93365e+06	Heavy	Unique	Used	5310786	9.93365e+06	1.87047	0.871481	-0.198459
VLAVDLLNPSHESEmRk	Unambiguous	40S ribosomal protein S27 [Schizosaccharomyces pombe 972h-]	1	1	19112006	M15(Oxidation); K17(Label:13C(6)15N(2))	HCD	1	0	1	1	3651			6.88419e+07	Heavy	Unique	Used	3.6716e+07	6.88419e+07	1.87499	0.872853	-0.19619
EVATAIRGAIImGk	Unambiguous	40S ribosomal protein S2 [Schizosaccharomyces pombe 972h-]	1	1	19075935	M12(Oxidation); K14(Label:13C(6)15N(2))	HCD	1	0	1	1	5913			2.84501e+06	Heavy	Unique	Used	1.48212e+06	2.78556e+06	1.87943	0.874201	-0.193964
TDASAVQAFGLRTHYGGGRTTGFALIYDDVEAmk	Unambiguous	40S ribosomal protein S24 [Schizosaccharomyces pombe 972h-]	1	1	19115165	M33(Oxidation); K34(Label:13C(6)15N(2))	HCD	1	0	1	1	4742			8.55561e+06	Heavy	Unique	Used	4.54179e+06	8.55561e+06	1.88375	0.875507	-0.19181
TDASAVQAFGLRTHYGGGRTTGFALIYDDVEAMk	Unambiguous	40S ribosomal protein S24 [Schizosaccharomyces pombe 972h-]	1	1	19115165	K34(Label:13C(6)15N(2))	HCD	1	0	1	1	4376			1160921940	Heavy	Unique	Used	610776516	1151613826	1.88549	0.876032	-0.190944
TDASAVQAFGLRTHYGGGRTTGFALIYDDVEAmk	Unambiguous	40S ribosomal protein S24 [Schizosaccharomyces pombe 972h-]	1	1	19115165	M33(Oxidation); K34(Label:13C(6)15N(2))	HCD	1	0	1	1	6289			5.99817e+08	Heavy	Unique	Used	315622197	595373762	1.88635	0.876292	-0.190517
SFQLLANNVDSk	Unambiguous	40S ribosomal protein S18 [Schizosaccharomyces pombe 972h-]	1	1	19113298	K12(Label:13C(6)15N(2))	HCD	1	0	1	1	4809			157422	Heavy	Unique	Used	77178.8	146251	1.89496	0.878889	-0.186247
AFVVIGDSDGHVGLGIk	Unambiguous	40S ribosomal protein S2 [Schizosaccharomyces pombe 972h-]	1	1	19075935	K17(Label:13C(6)15N(2))	HCD	1	0	1	1	6227			8.04548e+06	Heavy	Unique	Used	4230757	8.04548e+06	1.90166	0.880903	-0.182945
TDASAVQAFGLRTHYGGGRTTGFALIYDDVEAMK	Unambiguous	40S ribosomal protein S24 [Schizosaccharomyces pombe 972h-]	1	1	19115165		HCD	1	0	1	1	6383			7.66562e+07	Light	Unique	Used	7.66562e+07	1.46153e+08	1.9066	0.882384	-0.180522
FEPHYRLVRVGHAEPIQk	Unambiguous	40S ribosomal protein S24 [Schizosaccharomyces pombe 972h-]	1	1	19115165	K18(Label:13C(6)15N(2))	HCD	1	0	1	1	2234			2.02284e+08	Heavy	Unique	Used	1.06091e+08	2.02284e+08	1.90671	0.882417	-0.180468
THLRNMIILPEMVGSVVGIYNGk	Unambiguous	40S ribosomal protein S15 [Schizosaccharomyces pombe 972h-]	2	1	19075461	K23(Label:13C(6)15N(2))	HCD	1	0	1	1	6470			6.25501e+07	Heavy	Unique	Used	3.27348e+07	6.25501e+07	1.91081	0.883646	-0.17846
TDASAVQAFGLRTHYGGGRTTGFALIYDDVEAmk	Unambiguous	40S ribosomal protein S24 [Schizosaccharomyces pombe 972h-]	1	1	19115165	M33(Oxidation); K34(Label:13C(6)15N(2))	HCD	1	0	1	1	4191			1.16857e+09	Heavy	Unique	Used	608187668	1164082220	1.91402	0.884604	-0.176896
InVDQDTk	Unambiguous	40S ribosomal protein S17 [Schizosaccharomyces pombe 972h-]	1	1	19075512	N2(Deamidated); K8(Label:13C(6)15N(2))	HCD	1	0	1	1	388			5.34765e+07	Heavy	Unique	Used	2.7869e+07	5.34765e+07	1.91885	0.886048	-0.174544
TDASAVqAFGLRTHYGGGRTTGFALIYDDVEAmk	Unambiguous	40S ribosomal protein S24 [Schizosaccharomyces pombe 972h-]	1	1	19115165	Q7(Deamidated); M33(Oxidation); K34(Label:13C(6)15N(2))	HCD	1	0	1	1	6651			1.25775e+06	Heavy	Unique	Used	635085	1.21917e+06	1.91969	0.886298	-0.174137
TDASAVQAFGLRTHYGGGRTTGFALIYDDVEAMk	Unambiguous	40S ribosomal protein S24 [Schizosaccharomyces pombe 972h-]	1	1	19115165	K34(Label:13C(6)15N(2))	HCD	1	0	1	1	4395			2.78878e+08	Heavy	Unique	Used	1.44034e+08	2.7751e+08	1.9267	0.888387	-0.170739
TDASAVQAFGLRTHYGGGRTTGFALIYDDVEAMk	Unambiguous	40S ribosomal protein S24 [Schizosaccharomyces pombe 972h-]	1	1	19115165	K34(Label:13C(6)15N(2))	HCD	1	0	1	1	6989			1.05019e+07	Heavy	Unique	Used	5.29218e+06	1.02596e+07	1.93864	0.891931	-0.164995
FMTNRLLQRk	Unambiguous	40S ribosomal protein S24 [Schizosaccharomyces pombe 972h-]	2	2	19112688;19115165	K10(Label:13C(6)15N(2))	HCD	1	0	1	1	916		1	4.10657e+06	Heavy	Not Unique	Used	1.13813e+06	2214267	1.94553	0.893968	-0.161705
LIPEVIGRAIEk	Unambiguous	40S ribosomal protein S1 [Schizosaccharomyces pombe 972h-]	1	1	19113740	K12(Label:13C(6)15N(2))	HCD	1	0	1	1	1700			1.41126e+07	Heavy	Unique	Used	7.24063e+06	1.41126e+07	1.94908	0.895017	-0.160013
kDDGAAPGGFAPSFRGGFGRPVAA	Unambiguous	40S ribosomal protein S10 [Schizosaccharomyces pombe 972h-]	1	1	19112397	K1(Label:13C(6)15N(2))	HCD	1	0	1	1	3882			3.39631e+07	Heavy	Unique	Used	1.69854e+07	3.33825e+07	1.96536	0.899806	-0.152314
RAGELTTEELERIVTIIQNPSQFk	Unambiguous	40S ribosomal protein S18 [Schizosaccharomyces pombe 972h-]	1	1	19113298	K24(Label:13C(6)15N(2))	HCD	1	0	1	1	6561			1.16751e+06	Heavy	Unique	Used	592399	1.16751e+06	1.97082	0.901406	-0.149752
GDIPGVRFK	Unambiguous	40S ribosomal protein S23 [Schizosaccharomyces pombe 972h-]	1	1	19112979		HCD	1	0	1	1	3117			1734854172	Light	Unique	Used	1734854172	3423529912	1.97338	0.902156	-0.148551
QmVVDILHPGk	Unambiguous	40S ribosomal protein S24 [Schizosaccharomyces pombe 972h-]	2	2	19112688;19115165	M2(Oxidation); K11(Label:13C(6)15N(2))	HCD	1	0	1	1	3337			1669327719	Heavy	Not Unique	Used	8.45163e+08	1.66865e+09	1.97435	0.90244	-0.148096
EVATAIRGAIImGk	Unambiguous	40S ribosomal protein S2 [Schizosaccharomyces pombe 972h-]	1	1	19075935	M12(Oxidation); K14(Label:13C(6)15N(2))	HCD	1	0	1	1	1407			1.70249e+08	Heavy	Unique	Used	8.61172e+07	1.70029e+08	1.97439	0.902449	-0.148082
DQYVPEVSELEVDRVNVDQDTk	Unambiguous	40S ribosomal protein S17 [Schizosaccharomyces pombe 972h-]	1	1	19112037	K22(Label:13C(6)15N(2))	HCD	1	0	1	1	4736			6.31345e+06	Heavy	Unique	Used	3.18405e+06	6.31345e+06	1.98284	0.904916	-0.144143
GRRIRELTALVQk	Unambiguous	40S ribosomal protein S3 [Schizosaccharomyces pombe 972h-]	1	1	19113555	K13(Label:13C(6)15N(2))	HCD	1	0	1	1	931			2.79314e+07	Heavy	Unique	Used	1.40819e+07	2.79314e+07	1.9835	0.905108	-0.143838
HSARLGDSK	Unambiguous	40S ribosomal protein S8 [Schizosaccharomyces pombe 972h-]	2	1	19115431		HCD	1	0	1	1	53			6104561	Light	Unique	Used	6104561	1.21137e+07	1.98437	0.905364	-0.143429
LAGEYGLRNk	Unambiguous	40S ribosomal protein S9 [Schizosaccharomyces pombe 972h-]	2	2	19112632;19113857	K10(Label:13C(6)15N(2))	HCD	1	0	1	1	2647			2.6825e+08	Heavy	Not Unique	Used	1.3476e+08	2.67786e+08	1.98713	0.906168	-0.14215
QmVVDILHPGK	Unambiguous	40S ribosomal protein S24 [Schizosaccharomyces pombe 972h-]	2	2	19112688;19115165	M2(Oxidation)	HCD	1	0	1	1	3403			3.06843e+07	Light	Not Unique	Used	3.06843e+07	6.10052e+07	1.98815	0.906464	-0.141678
kDDGAAPGGFAPSFRGGFGRPVAA	Unambiguous	40S ribosomal protein S10 [Schizosaccharomyces pombe 972h-]	1	1	19112397	K1(Label:13C(6)15N(2))	HCD	1	0	1	1	3749			7.39955e+07	Heavy	Unique	Used	35629102	71042342	1.99394	0.908146	-0.139003
WQSTIEANQTIk	Unambiguous	40S ribosomal protein S1 [Schizosaccharomyces pombe 972h-]	1	1	19113740	K12(Label:13C(6)15N(2))	HCD	1	0	1	1	1274			8.40391e+07	Heavy	Unique	Used	4.20808e+07	8.40391e+07	1.99709	0.90906	-0.137553
LIPEVIGRAIEk	Unambiguous	40S ribosomal protein S1 [Schizosaccharomyces pombe 972h-]	1	1	19113740	K12(Label:13C(6)15N(2))	HCD	1	0	1	1	3890			9.32561e+07	Heavy	Unique	Used	4.66827e+07	9.32561e+07	1.99766	0.909225	-0.13729
AILmQRLIk	Unambiguous	40S ribosomal protein S4 [Schizosaccharomyces pombe 972h-]	2	1	19113142	M4(Oxidation); K9(Label:13C(6)15N(2))	HCD	1	0	1	1	1102			2.04991e+07	Heavy	Unique	Used	1.00991e+07	2.02565e+07	2.00578	0.911576	-0.133565
FRALRLDSGNFSWGSEGVSk	Unambiguous	40S ribosomal protein S8 [Schizosaccharomyces pombe 972h-]	2	1	19115431	K20(Label:13C(6)15N(2))	HCD	1	0	1	1	3973			127200791	Heavy	Unique	Used	6.33618e+07	127200791	2.00753	0.912081	-0.132766
LRVEDIQGk	Unambiguous	40S ribosomal protein S1 [Schizosaccharomyces pombe 972h-]	2	2	19114028;19113740	K9(Label:13C(6)15N(2))	HCD	1	0	1	1	2728			6.29434e+07	Heavy	Not Unique	Used	3.13194e+07	6.29434e+07	2.00973	0.912715	-0.131763
HEIWRVALTLSK	Unambiguous	40S ribosomal protein S9 [Schizosaccharomyces pombe 972h-]	2	2	19112632;19113857		HCD	1	0	1	1	3854			4.18465e+08	Light	Not Unique	Used	4.18465e+08	845961565	2.02158	0.916129	-0.126377
TDASAVQAFGLRTHYGGGRTTGFALIYDDVEAmk	Unambiguous	40S ribosomal protein S24 [Schizosaccharomyces pombe 972h-]	1	1	19115165	M33(Oxidation); K34(Label:13C(6)15N(2))	HCD	1	0	1	1	6656			2.24397e+06	Heavy	Unique	Used	1.08912e+06	2.20854e+06	2.02781	0.917918	-0.123562
RIQRGPVRGISFK	Unambiguous	40S ribosomal protein S17 [Schizosaccharomyces pombe 972h-]	2	2	19075512;19112037		HCD	1	0	1	1	491			4.56188e+07	Light	Not Unique	Used	4.56188e+07	9.25978e+07	2.02982	0.918493	-0.12266
QmVVDILHPGk	Unambiguous	40S ribosomal protein S24 [Schizosaccharomyces pombe 972h-]	2	2	19112688;19115165	M2(Oxidation); K11(Label:13C(6)15N(2))	HCD	1	0	1	1	3329			8.4715e+08	Heavy	Not Unique	Used	4.16857e+08	846507452	2.03069	0.918743	-0.122267
ATNNIYPLQNVFVRk	Unambiguous	40S ribosomal protein S1 [Schizosaccharomyces pombe 972h-]	1	1	19113740	K15(Label:13C(6)15N(2))	HCD	1	0	1	1	4061			46139655	Heavy	Unique	Used	21493287	43647266	2.03074	0.918757	-0.122245
THLRNMIILPEMVGSVVGIYNGk	Unambiguous	40S ribosomal protein S15 [Schizosaccharomyces pombe 972h-]	2	1	19075461	K23(Label:13C(6)15N(2))	HCD	1	0	1	1	4530			119436307	Heavy	Unique	Used	58625149	119436307	2.03729	0.92063	-0.119306
RIQRGPVRGISFk	Unambiguous	40S ribosomal protein S17 [Schizosaccharomyces pombe 972h-]	2	2	19075512;19112037	K13(Label:13C(6)15N(2))	HCD	1	0	1	1	489			64376910	Heavy	Not Unique	Used	31565726	64376910	2.03946	0.92125	-0.118336
SWISLPk	Unambiguous	40S ribosomal protein S4 [Schizosaccharomyces pombe 972h-]	3	2	19112469;19113142	K7(Label:13C(6)15N(2))	HCD	1	0	1	1	3978			1.15975e+08	Heavy	Not Unique	Used	56837887	1.15975e+08	2.04045	0.921534	-0.117891
TDASAVQAFGLRTHYGGGRTTGFALIYDDVEAmk	Unambiguous	40S ribosomal protein S24 [Schizosaccharomyces pombe 972h-]	1	1	19115165	M33(Oxidation); K34(Label:13C(6)15N(2))	HCD	1	0	1	1	6634			6591169	Heavy	Unique	Used	3.22952e+06	6591169	2.04091	0.921665	-0.117685
TTYAQSSQIRAIHQk	Unambiguous	40S ribosomal protein S1 [Schizosaccharomyces pombe 972h-]	1	1	19113740	K15(Label:13C(6)15N(2))	HCD	1	0	1	1	399			1.91963e+07	Heavy	Unique	Used	8.9659e+06	1.82995e+07	2.04101	0.921694	-0.11764
FAENTVELYAEk	Unambiguous	40S ribosomal protein S3 [Schizosaccharomyces pombe 972h-]	1	1	19113555	K12(Label:13C(6)15N(2))	HCD	1	0	1	1	6049			2.53439e+07	Heavy	Unique	Used	1.24137e+07	2.53439e+07	2.04161	0.921864	-0.117375
LAGEYGLRNk	Unambiguous	40S ribosomal protein S9 [Schizosaccharomyces pombe 972h-]	2	2	19112632;19113857	K10(Label:13C(6)15N(2))	HCD	1	0	1	1	5510			1.25061e+07	Heavy	Not Unique	Used	6.01371e+06	1.22959e+07	2.04464	0.92273	-0.11602
ImLPEPK	Unambiguous	40S ribosomal protein S3 [Schizosaccharomyces pombe 972h-]	1	1	19113555	M2(Oxidation)	HCD	0.2927	0	1	1	1187		1	1.67518e+06	Light	Unique	Used	1.67518e+06	3.4262e+06	2.04527	0.922909	-0.115739
VTAFVPHDGCLnFVDENDEVLLSGFGRk	Unambiguous	40S ribosomal protein S23 [Schizosaccharomyces pombe 972h-]	1	1	19112979	N12(Deamidated); K28(Label:13C(6)15N(2))	HCD	0.4516	0	1	1	6476		1	5.11552e+06	Heavy	Unique	Used	1.71762e+06	3.51321e+06	2.04539	0.922943	-0.115687
DVGLGFk	Unambiguous	40S ribosomal protein S11 [Schizosaccharomyces pombe 972h-]	1	1	19115584	K7(Label:13C(6)15N(2))	HCD	1	0	1	1	5910			1.59467e+07	Heavy	Unique	Used	7.78e+06	1.59318e+07	2.04779	0.923626	-0.11462
VGALPPTWK	Unambiguous	40S ribosomal protein S13 [Schizosaccharomyces pombe 972h-]	1	1	19114812		HCD	1	0	1	1	1413			4.2075e+08	Light	Unique	Used	4.2075e+08	8.64009e+08	2.0535	0.925248	-0.112088
WVNQLLPSRQVGVIVLTTSRGIMSHNEARAk	Unambiguous	40S ribosomal protein S22 [Schizosaccharomyces pombe 972h-]	1	1	19114146	K31(Label:13C(6)15N(2))	HCD	1	0	1	1	4296			4.14464e+07	Heavy	Unique	Used	1.99249e+07	4.09333e+07	2.05438	0.925499	-0.111697
DISLVDYITIGNGQPLPHTAGRFQTk	Unambiguous	40S ribosomal protein S5 [Schizosaccharomyces pombe 972h-]	2	1	19115124	K26(Label:13C(6)15N(2))	HCD	1	0	1	1	6321			2.61969e+06	Heavy	Unique	Used	1.27149e+06	2.61969e+06	2.06032	0.927185	-0.10907
LLELHGESQDVGSk	Unambiguous	40S ribosomal protein S1 [Schizosaccharomyces pombe 972h-]	1	1	19113740	K14(Label:13C(6)15N(2))	HCD	1	0	1	1	940			2.27553e+08	Heavy	Unique	Used	1.10358e+08	2.27553e+08	2.06195	0.927647	-0.108352
LQEEERERK	Unambiguous	40S ribosomal protein S17 [Schizosaccharomyces pombe 972h-]	2	2	19075512;19112037		HCD	1	0	1	1	81			1.97068e+08	Light	Not Unique	Used	1.97068e+08	4.06884e+08	2.06469	0.928422	-0.107147
THLRNmIILPEMVGSVVGIYnGk	Unambiguous	40S ribosomal protein S15 [Schizosaccharomyces pombe 972h-]	2	1	19075461	M6(Oxidation); N21(Deamidated); K23(Label:13C(6)15N(2))	HCD	1	0	1	1	4415			3.78097e+07	Heavy	Unique	Used	1.8309e+07	3.78097e+07	2.06508	0.928533	-0.106974
VELAVLK	Unambiguous	ubiquitin-40S ribosomal protein S31 fusion protein [Schizosaccharomyces pombe 972h-]	2	1	19114970		HCD	1	0	1	1	1424			3.39307e+06	Light	Unique	Used	3.32202e+06	6.86222e+06	2.06568	0.928701	-0.106713
LLAGLAVRRAAYGVLRYVMEAGAk	Unambiguous	40S ribosomal protein S3 [Schizosaccharomyces pombe 972h-]	1	1	19113555	K24(Label:13C(6)15N(2))	HCD	1	0	1	1	6552			4.21021e+07	Heavy	Unique	Used	2.03585e+07	4.21021e+07	2.06804	0.929369	-0.105676
SIEEIYLYSLPIK	Unambiguous	40S ribosomal protein S2 [Schizosaccharomyces pombe 972h-]	1	1	19075935		HCD	1	0	1	1	4533			2.15826e+08	Light	Unique	Used	2.15826e+08	447796130	2.0748	0.931277	-0.102718
FEPHYRLVRVGQAEPIQK	Unambiguous	40S ribosomal protein S24 [Schizosaccharomyces pombe 972h-]	1	1	19112688		HCD	1	0	1	1	2288			1.97022e+08	Light	Unique	Used	1.97022e+08	4.09015e+08	2.07598	0.931611	-0.1022
GRRIRELTALVQk	Unambiguous	40S ribosomal protein S3 [Schizosaccharomyces pombe 972h-]	1	1	19113555	K13(Label:13C(6)15N(2))	HCD	1	0	1	1	2231			1.4218e+08	Heavy	Unique	Used	6.83844e+07	1.4218e+08	2.07913	0.932496	-0.10083
QmVVDILHPGK	Unambiguous	40S ribosomal protein S24 [Schizosaccharomyces pombe 972h-]	2	2	19112688;19115165	M2(Oxidation)	HCD	1	0	1	1	1349			1236623296	Light	Not Unique	Used	1236623296	2572112192	2.07995	0.932727	-0.100472
LLELHGESQDVGSk	Unambiguous	40S ribosomal protein S1 [Schizosaccharomyces pombe 972h-]	1	1	19113740	K14(Label:13C(6)15N(2))	HCD	1	0	1	1	5682			4.17994e+06	Heavy	Unique	Used	2.00686e+06	4.17994e+06	2.08282	0.933536	-0.0992222
FMTnRLLQRk	Unambiguous	40S ribosomal protein S24 [Schizosaccharomyces pombe 972h-]	2	2	19112688;19115165	N4(Deamidated); K10(Label:13C(6)15N(2))	HCD	1	0	1	1	2951			1.24044e+08	Heavy	Not Unique	Used	5.95545e+07	1.24044e+08	2.08286	0.933547	-0.0992052
WQSTIEANQTIk	Unambiguous	40S ribosomal protein S1 [Schizosaccharomyces pombe 972h-]	1	1	19113740	K12(Label:13C(6)15N(2))	HCD	1	0	1	1	5845		1	5.10094e+06	Heavy	Unique	Used	1.41992e+06	2.95755e+06	2.0829	0.933557	-0.0991899
APAFFEVk	Unambiguous	40S ribosomal protein S1 [Schizosaccharomyces pombe 972h-]	2	2	19114028;19113740	K8(Label:13C(6)15N(2))	HCD	1	0	1	1	6112			9.55922e+06	Heavy	Not Unique	Used	4.38564e+06	9.13584e+06	2.08313	0.933622	-0.0990902
ATNNIYPLQNVFVRk	Unambiguous	40S ribosomal protein S1 [Schizosaccharomyces pombe 972h-]	1	1	19113740	K15(Label:13C(6)15N(2))	HCD	1	0	1	1	1840			7.36953e+06	Heavy	Unique	Used	3.48027e+06	7.25605e+06	2.08491	0.934122	-0.0983172
EVGITALHIk	Unambiguous	40S ribosomal protein S14 [Schizosaccharomyces pombe 972h-]	1	1	19115099	K10(Label:13C(6)15N(2))	HCD	1	0	1	1	3535			6.65821e+07	Heavy	Unique	Used	3.19318e+07	6.65821e+07	2.08514	0.934186	-0.0982183
LLELHGESQDVGSK	Unambiguous	40S ribosomal protein S1 [Schizosaccharomyces pombe 972h-]	1	1	19113740		HCD	1	0	1	1	941			6.75172e+07	Light	Unique	Used	6.70392e+07	139948208	2.08756	0.934866	-0.0971681
RLFEGNAIIRRLVRLGILDESRmk	Unambiguous	40S ribosomal protein S9 [Schizosaccharomyces pombe 972h-]	1	1	19112632	M23(Oxidation); K24(Label:13C(6)15N(2))	HCD	1	0	1	1	6916			5.33386e+06	Heavy	Unique	Used	2.45093e+06	5.13244e+06	2.09408	0.936695	-0.0943493
LIPEVIGRAIEk	Unambiguous	40S ribosomal protein S1 [Schizosaccharomyces pombe 972h-]	1	1	19113740	K12(Label:13C(6)15N(2))	HCD	1	0	1	1	1706			8.70661e+06	Heavy	Unique	Used	4.15562e+06	8.70661e+06	2.09514	0.936991	-0.0938928
HGRPGIGATHSSRFIPLk	Unambiguous	40S ribosomal protein S15 [Schizosaccharomyces pombe 972h-]	2	1	19075461	K18(Label:13C(6)15N(2))	HCD	1	0	1	1	679			1.79857e+09	Heavy	Unique	Used	8.58035e+08	1.79857e+09	2.09615	0.937272	-0.0934598
AIHqALFSQGVLVAk	Unambiguous	40S ribosomal protein S10 [Schizosaccharomyces pombe 972h-]	1	1	19114930	Q4(Deamidated); K15(Label:13C(6)15N(2))	HCD	0.2045	0	1	1	1710			1.93802e+06	Heavy	Unique	Used	924263	1.93802e+06	2.09682	0.937462	-0.0931682
FAENTVELYAEk	Unambiguous	40S ribosomal protein S3 [Schizosaccharomyces pombe 972h-]	1	1	19113555	K12(Label:13C(6)15N(2))	HCD	1	0	1	1	3759			436799564	Heavy	Unique	Used	2.07858e+08	436799564	2.10144	0.938751	-0.0911848
SFqLLANNVDSk	Unambiguous	40S ribosomal protein S18 [Schizosaccharomyces pombe 972h-]	1	1	19113298	Q3(Deamidated); K12(Label:13C(6)15N(2))	HCD	1	0	1	1	1709			1.10996e+08	Heavy	Unique	Used	5.10301e+07	107254107	2.10178	0.938847	-0.091038
VGALPPTWk	Unambiguous	40S ribosomal protein S13 [Schizosaccharomyces pombe 972h-]	1	1	19114812	K9(Label:13C(6)15N(2))	HCD	1	0	1	1	6122		1	1.38749e+07	Heavy	Unique	Used	3766175	7.92644e+06	2.10464	0.939645	-0.0898125
FmTNRLLQRk	Unambiguous	40S ribosomal protein S24 [Schizosaccharomyces pombe 972h-]	2	2	19112688;19115165	M2(Oxidation); K10(Label:13C(6)15N(2))	HCD	1	0	1	1	485			4.09617e+09	Heavy	Not Unique	Used	1944890098	4.09617e+09	2.10612	0.940057	-0.0891796
LGSFSSVYHk	Unambiguous	40S ribosomal protein S7 [Schizosaccharomyces pombe 972h-]	1	1	19114589	K10(Label:13C(6)15N(2))	HCD	1	0	1	1	3039			3.57891e+08	Heavy	Unique	Used	1.69305e+08	3.57164e+08	2.10958	0.941023	-0.087698
VYGGSVNRGMRPSHHRDGSGSVQRk	Unambiguous	40S ribosomal protein S19 [Schizosaccharomyces pombe 972h-]	2	2	19113385;19112013	K25(Label:13C(6)15N(2))	HCD	1	0	1	1	6679			3491854	Heavy	Not Unique	Used	1.65512e+06	3491854	2.10973	0.941065	-0.0876343
RAGELTTEELERIVTIIQNPSQFk	Unambiguous	40S ribosomal protein S18 [Schizosaccharomyces pombe 972h-]	1	1	19113298	K24(Label:13C(6)15N(2))	HCD	1	0	1	1	4645			3.7409e+06	Heavy	Unique	Used	1.77205e+06	3.7409e+06	2.11106	0.941433	-0.08707
TDASAVQAFGLRTHYGGGRTTGFALIYDDVEAMk	Unambiguous	40S ribosomal protein S24 [Schizosaccharomyces pombe 972h-]	1	1	19115165	K34(Label:13C(6)15N(2))	HCD	1	0	1	1	6652			909748	Heavy	Unique	Used	378211	798647	2.11164	0.941596	-0.0868192
kDEGAAPSGFAPSFRGGFGRPQ	Unambiguous	40S ribosomal protein S10 [Schizosaccharomyces pombe 972h-]	1	1	19114930	K1(Label:13C(6)15N(2))	HCD	1	0	1	1	6027			7.66812e+06	Heavy	Unique	Used	3.54724e+06	7.49701e+06	2.11348	0.942106	-0.0860384
FmTNRLLQRk	Unambiguous	40S ribosomal protein S24 [Schizosaccharomyces pombe 972h-]	2	2	19112688;19115165	M2(Oxidation); K10(Label:13C(6)15N(2))	HCD	1	0	1	1	5559			1.23718e+08	Heavy	Not Unique	Used	5.85184e+07	1.23718e+08	2.11417	0.942298	-0.0857445
FmTNRLLQRK	Unambiguous	40S ribosomal protein S24 [Schizosaccharomyces pombe 972h-]	2	2	19112688;19115165	M2(Oxidation)	HCD	1	0	1	1	2678			2045180107	Light	Not Unique	Used	2045180107	4.32769e+09	2.11604	0.942819	-0.0849467
RLFEGNAIIRRLVRLGILDETRMk	Unambiguous	40S ribosomal protein S9 [Schizosaccharomyces pombe 972h-]	1	1	19113857	K24(Label:13C(6)15N(2))	HCD	1	0	1	1	4338			2.46499e+07	Heavy	Unique	Used	1.16467e+07	2.46499e+07	2.11647	0.942939	-0.0847638
HIDFALSSpYGGGRpGRCk	Unambiguous	40S ribosomal protein S9 [Schizosaccharomyces pombe 972h-]	2	2	19112632;19113857	P9(Dioxidation); P15(Oxidation); K19(Label:13C(6)15N(2))	HCD	0.1875	0	1	1	3482			57285586	Heavy	Not Unique	Used	2.70165e+07	57285586	2.12039	0.944026	-0.0831013
LQEEERERK	Unambiguous	40S ribosomal protein S17 [Schizosaccharomyces pombe 972h-]	2	2	19075512;19112037		HCD	1	0	1	1	66			1.20428e+08	Light	Not Unique	Used	1.20428e+08	2.55502e+08	2.12162	0.944366	-0.0825819
LLAGLAVRRAAYGVLRYVMEAGAk	Unambiguous	40S ribosomal protein S3 [Schizosaccharomyces pombe 972h-]	1	1	19113555	K24(Label:13C(6)15N(2))	HCD	1	0	1	1	4638			3.28228e+07	Heavy	Unique	Used	1.54632e+07	3.28228e+07	2.12263	0.944648	-0.0821505
TDASAVQAFGLRTHYGGGRTTGFALIYDDVEAmk	Unambiguous	40S ribosomal protein S24 [Schizosaccharomyces pombe 972h-]	1	1	19115165	M33(Oxidation); K34(Label:13C(6)15N(2))	HCD	1	0	1	1	4668			5.69935e+07	Heavy	Unique	Used	2.68017e+07	5.69935e+07	2.12649	0.945716	-0.0805208
DVGLGFk	Unambiguous	40S ribosomal protein S11 [Schizosaccharomyces pombe 972h-]	1	1	19115584	K7(Label:13C(6)15N(2))	HCD	1	0	1	1	3457			911957056	Heavy	Unique	Used	428713688	911957056	2.12719	0.945911	-0.0802236
FMTNRLLQRK	Unambiguous	40S ribosomal protein S24 [Schizosaccharomyces pombe 972h-]	2	2	19112688;19115165		HCD	1	0	1	1	2866			3.4971e+09	Light	Not Unique	Used	3.49587e+09	7.43649e+09	2.12722	0.945919	-0.0802113
FmTNRLLQRk	Unambiguous	40S ribosomal protein S24 [Schizosaccharomyces pombe 972h-]	2	2	19112688;19115165	M2(Oxidation); K10(Label:13C(6)15N(2))	HCD	1	0	1	1	2668			8.31283e+08	Heavy	Not Unique	Used	3.90698e+08	8.31283e+08	2.12769	0.946047	-0.0800159
GRILEVSLADLQk	Unambiguous	40S ribosomal protein S1 [Schizosaccharomyces pombe 972h-]	2	2	19114028;19113740	K13(Label:13C(6)15N(2))	HCD	1	0	1	1	3959			204229750	Heavy	Not Unique	Used	9.59701e+07	204229750	2.12806	0.946149	-0.07986
TLGNFVk	Unambiguous	40S ribosomal protein S2 [Schizosaccharomyces pombe 972h-]	1	1	19075935	K7(Label:13C(6)15N(2))	HCD	1	0	1	1	3086			2.1453e+08	Heavy	Unique	Used	100761693	2.1453e+08	2.12908	0.946434	-0.079426
VGALPPTWK	Unambiguous	40S ribosomal protein S13 [Schizosaccharomyces pombe 972h-]	1	1	19114812		HCD	1	0	1	1	5919			8.25646e+07	Light	Unique	Used	8.25646e+07	1.76222e+08	2.13435	0.94789	-0.0772084
FMTNRLLQRk	Unambiguous	40S ribosomal protein S24 [Schizosaccharomyces pombe 972h-]	2	2	19112688;19115165	K10(Label:13C(6)15N(2))	HCD	1	0	1	1	2216			4.61023e+09	Heavy	Not Unique	Used	2.15975e+09	4.61023e+09	2.13462	0.947962	-0.0770988
THLRNMIILPEmVGSVVGIYNGk	Unambiguous	40S ribosomal protein S15 [Schizosaccharomyces pombe 972h-]	2	1	19075461	M12(Oxidation); K23(Label:13C(6)15N(2))	HCD	0.1754	0	1	1	6309			1.66083e+07	Heavy	Unique	Used	7.77504e+06	1.66083e+07	2.1361	0.948371	-0.0764764
SLPDIVVVLDPk	Unambiguous	40S ribosomal protein S3 [Schizosaccharomyces pombe 972h-]	1	1	19113555	K12(Label:13C(6)15N(2))	HCD	1	0	1	1	4454			1.95316e+08	Heavy	Unique	Used	9.14343e+07	1.95316e+08	2.13614	0.948382	-0.0764597
GMSPSqIGVTLRDSHGIPQVRFITGQk	Unambiguous	40S ribosomal protein S13 [Schizosaccharomyces pombe 972h-]	1	1	19114812	Q6(Deamidated); K27(Label:13C(6)15N(2))	HCD	1	0	1	1	5248			1.37031e+07	Heavy	Unique	Used	6.39789e+06	1.37031e+07	2.14182	0.949947	-0.0740806
RLFEGNAIIRRLVRLGILDESRMk	Unambiguous	40S ribosomal protein S9 [Schizosaccharomyces pombe 972h-]	1	1	19112632	K24(Label:13C(6)15N(2))	HCD	1	0	1	1	5285			1.49963e+07	Heavy	Unique	Used	6.99731e+06	1.49963e+07	2.14315	0.950314	-0.0735243
QMVVDILHPGk	Unambiguous	40S ribosomal protein S24 [Schizosaccharomyces pombe 972h-]	2	2	19112688;19115165	K11(Label:13C(6)15N(2))	HCD	1	0	1	1	3729			5081952969	Heavy	Not Unique	Used	2370078487	5081952969	2.14421	0.950606	-0.0730805
DQYVPEVSELEVDRVNVDQDTK	Unambiguous	40S ribosomal protein S17 [Schizosaccharomyces pombe 972h-]	1	1	19112037		HCD	1	0	1	1	6210			436579022	Light	Unique	Used	436579022	9.36579e+08	2.14527	0.950896	-0.0726405
RLFEGNAIIRRLVRLGILDESRmk	Unambiguous	40S ribosomal protein S9 [Schizosaccharomyces pombe 972h-]	1	1	19112632	M23(Oxidation); K24(Label:13C(6)15N(2))	HCD	1	0	1	1	4250			71207290	Heavy	Unique	Used	3.31695e+07	71207290	2.14677	0.951308	-0.0720153
kDEGAAPSGFAPSFRGGFGRPQ	Unambiguous	40S ribosomal protein S10 [Schizosaccharomyces pombe 972h-]	1	1	19114930	K1(Label:13C(6)15N(2))	HCD	1	0	1	1	3655			8.04378e+09	Heavy	Unique	Used	3744813547	8041105295	2.14726	0.951445	-0.0718079
LAGEYGLRNk	Unambiguous	40S ribosomal protein S9 [Schizosaccharomyces pombe 972h-]	2	2	19112632;19113857	K10(Label:13C(6)15N(2))	HCD	1	0	1	1	5512			3.3808e+06	Heavy	Not Unique	Used	1.55721e+06	3.3444e+06	2.14769	0.951562	-0.0716307
ATNNIYPLQNVFVRk	Unambiguous	40S ribosomal protein S1 [Schizosaccharomyces pombe 972h-]	1	1	19113740	K15(Label:13C(6)15N(2))	HCD	1	0	1	1	6226			4.89279e+06	Heavy	Unique	Used	2.18109e+06	4.6844e+06	2.14773	0.951573	-0.0716138
HGYIDEFTEIDDHRSGk	Unambiguous	40S ribosomal protein S22 [Schizosaccharomyces pombe 972h-]	1	1	19114146	K17(Label:13C(6)15N(2))	HCD	1	0	1	1	5984			2.12566e+06	Heavy	Unique	Used	962875	2.06832e+06	2.14807	0.951665	-0.071474
DVGLGFk	Unambiguous	40S ribosomal protein S11 [Schizosaccharomyces pombe 972h-]	1	1	19115584	K7(Label:13C(6)15N(2))	HCD	1	0	1	1	5982			1.43878e+06	Heavy	Unique	Used	662667	1.42353e+06	2.14819	0.951698	-0.0714242
VPRRPFESARLDAELk	Unambiguous	40S ribosomal protein S9 [Schizosaccharomyces pombe 972h-]	2	2	19112632;19113857	K16(Label:13C(6)15N(2))	HCD	1	0	1	1	5019			2.27628e+08	Heavy	Not Unique	Used	1.05871e+08	2.27628e+08	2.15004	0.952208	-0.070652
AFVVIGDSDGHVGLGIk	Unambiguous	40S ribosomal protein S2 [Schizosaccharomyces pombe 972h-]	1	1	19075935	K17(Label:13C(6)15N(2))	HCD	1	0	1	1	4086			1.40714e+08	Heavy	Unique	Used	6.54416e+07	1.40714e+08	2.15022	0.952256	-0.070578
QIVNVPSFVVRLDAQK	Unambiguous	40S ribosomal protein S9 [Schizosaccharomyces pombe 972h-]	1	1	19112632		HCD	1	0	1	1	4195			1.9452e+08	Light	Unique	Used	1.9452e+08	4.18492e+08	2.15141	0.952584	-0.0700822
LLAGLAVRRAAYGVLRYVmEAGAk	Unambiguous	40S ribosomal protein S3 [Schizosaccharomyces pombe 972h-]	1	1	19113555	M19(Oxidation); K24(Label:13C(6)15N(2))	HCD	1	0	1	1	6955			58563649	Heavy	Unique	Used	2.6736e+07	5.75274e+07	2.15168	0.952658	-0.0699698
FADGFmIHSGQPAVDFIDSATRHVLLRQGVLGVk	Unambiguous	40S ribosomal protein S3 [Schizosaccharomyces pombe 972h-]	1	1	19113555	M6(Oxidation); K34(Label:13C(6)15N(2))	HCD	1	0	1	1	6952			1.10853e+08	Heavy	Unique	Used	5.15133e+07	1.10853e+08	2.15193	0.952724	-0.0698691
AIHQALFSqGVLVAk	Unambiguous	40S ribosomal protein S10 [Schizosaccharomyces pombe 972h-]	1	1	19114930	Q9(Deamidated); K15(Label:13C(6)15N(2))	HCD	0.4035	0	1	1	3891			3.14467e+07	Heavy	Unique	Used	1.46092e+07	3.14467e+07	2.15252	0.952888	-0.069622
VYGGSVNRGmRPSHHRDGSGSVQRk	Unambiguous	40S ribosomal protein S19 [Schizosaccharomyces pombe 972h-]	2	2	19113385;19112013	M10(Oxidation); K25(Label:13C(6)15N(2))	HCD	1	0	1	1	4832			2.11016e+08	Heavy	Not Unique	Used	94950996	204390662	2.15259	0.952907	-0.0695928
DQYVPEVSELEVDRVNVDQDTk	Unambiguous	40S ribosomal protein S17 [Schizosaccharomyces pombe 972h-]	1	1	19112037	K22(Label:13C(6)15N(2))	HCD	1	0	1	1	4053			5.06066e+09	Heavy	Unique	Used	2331317160	5021641936	2.15399	0.953291	-0.0690108
HEIWRVALTLSK	Unambiguous	40S ribosomal protein S9 [Schizosaccharomyces pombe 972h-]	2	2	19112632;19113857		HCD	1	0	1	1	6107			2.96017e+07	Light	Not Unique	Used	2.96017e+07	6.38218e+07	2.15601	0.953845	-0.0681729
LREDLERLk	Unambiguous	40S ribosomal protein S18 [Schizosaccharomyces pombe 972h-]	1	1	19113298	K9(Label:13C(6)15N(2))	HCD	1	0	1	1	638			1.03127e+10	Heavy	Unique	Used	4776356643	1.03127e+10	2.15911	0.954693	-0.0668907
RALVHDGLARGIREASK	Unambiguous	40S ribosomal protein S12 [Schizosaccharomyces pombe 972h-]	2	1	19075369		HCD	1	0	1	1	2654			8.89525e+08	Light	Unique	Used	8.87626e+08	1.91813e+09	2.16096	0.955199	-0.0661263
VmFAMTQIk	Unambiguous	40S ribosomal protein S18 [Schizosaccharomyces pombe 972h-]	1	1	19113298	M2(Oxidation); K9(Label:13C(6)15N(2))	HCD	1	0	1	1	6042			1.69282e+08	Heavy	Unique	Used	7.81839e+07	1.69073e+08	2.1625	0.95562	-0.0654907
ANGLAPELPEDLYNLIk	Unambiguous	40S ribosomal protein S13 [Schizosaccharomyces pombe 972h-]	1	1	19114812	K17(Label:13C(6)15N(2))	HCD	1	0	1	1	6621		1	417221	Heavy	Unique	Used	192908	417221	2.1628	0.955701	-0.0653694
ATNNIYPLQNVFVRk	Unambiguous	40S ribosomal protein S1 [Schizosaccharomyces pombe 972h-]	1	1	19113740	K15(Label:13C(6)15N(2))	HCD	1	0	1	1	4063			1.8136e+08	Heavy	Unique	Used	8.38084e+07	1.8136e+08	2.16399	0.956026	-0.0648776
QMVVDILHPGk	Unambiguous	40S ribosomal protein S24 [Schizosaccharomyces pombe 972h-]	2	2	19112688;19115165	K11(Label:13C(6)15N(2))	HCD	1	0	1	1	1638			1.76369e+09	Heavy	Not Unique	Used	8.14999e+08	1.76369e+09	2.16404	0.95604	-0.0648571
AIHQALFQQGVLVAk	Unambiguous	40S ribosomal protein S10 [Schizosaccharomyces pombe 972h-]	1	1	19112397	K15(Label:13C(6)15N(2))	HCD	1	0	1	1	3757			2053153187	Heavy	Unique	Used	9.47885e+08	2053153187	2.16604	0.956585	-0.0640351
QMVVDILHPGk	Unambiguous	40S ribosomal protein S24 [Schizosaccharomyces pombe 972h-]	2	2	19112688;19115165	K11(Label:13C(6)15N(2))	HCD	1	0	1	1	3736			2694711624	Heavy	Not Unique	Used	1.24355e+09	2694711624	2.16695	0.956836	-0.0636566
LREDLERLk	Unambiguous	40S ribosomal protein S18 [Schizosaccharomyces pombe 972h-]	1	1	19113298	K9(Label:13C(6)15N(2))	HCD	1	0	1	1	2700			9.2705e+09	Heavy	Unique	Used	4276611274	9.2705e+09	2.16772	0.957045	-0.0633414
kDEGAAPSGFAPSFRGGFGRPQ	Unambiguous	40S ribosomal protein S10 [Schizosaccharomyces pombe 972h-]	1	1	19114930	K1(Label:13C(6)15N(2))	HCD	1	0	1	1	3657			6661190527	Heavy	Unique	Used	3072277951	6661190527	2.16816	0.957165	-0.063161
VLAVDLLNPSHESEmRk	Unambiguous	40S ribosomal protein S27 [Schizosaccharomyces pombe 972h-]	1	1	19112006	M15(Oxidation); K17(Label:13C(6)15N(2))	HCD	1	0	1	1	1600			2.59516e+07	Heavy	Unique	Used	1.18968e+07	2.57993e+07	2.1686	0.957285	-0.06298
AIHQALFSQGVLVAK	Unambiguous	40S ribosomal protein S10 [Schizosaccharomyces pombe 972h-]	1	1	19114930		HCD	1	0	1	1	3767			2147297443	Light	Unique	Used	2147297443	4.65791e+09	2.1692	0.957447	-0.0627356
kDEGAAPSGFAPSFRGGFGRPQ	Unambiguous	40S ribosomal protein S10 [Schizosaccharomyces pombe 972h-]	1	1	19114930	K1(Label:13C(6)15N(2))	HCD	1	0	1	1	3656			1948728390	Heavy	Unique	Used	898293338	1948728390	2.16937	0.957494	-0.0626649
RAGELTTEELERIVTIIQNPSQFK	Unambiguous	40S ribosomal protein S18 [Schizosaccharomyces pombe 972h-]	1	1	19113298		HCD	1	0	1	1	6510			7336254932	Light	Unique	Used	7336254932	15917027604	2.16964	0.957568	-0.0625532
AIHQALFqQGVLVAk	Unambiguous	40S ribosomal protein S10 [Schizosaccharomyces pombe 972h-]	1	1	19112397	Q8(Deamidated); K15(Label:13C(6)15N(2))	HCD	0.0196	0	1	1	3864			5.55784e+07	Heavy	Unique	Used	2.5613e+07	5.55784e+07	2.16993	0.957646	-0.0624356
LRnHRREERWADAHYk	Unambiguous	40S ribosomal protein S23 [Schizosaccharomyces pombe 972h-]	1	1	19112979	N3(Deamidated); K16(Label:13C(6)15N(2))	HCD	1	0	1	1	2486			8.03388e+07	Heavy	Unique	Used	36153229	78449919	2.16993	0.957647	-0.0624346
AIHQALFQQGVLVAk	Unambiguous	40S ribosomal protein S10 [Schizosaccharomyces pombe 972h-]	1	1	19112397	K15(Label:13C(6)15N(2))	HCD	1	0	1	1	3758			1257037432	Heavy	Unique	Used	5.79178e+08	1257037432	2.17038	0.95777	-0.0622491
FMTNRLLQRK	Unambiguous	40S ribosomal protein S24 [Schizosaccharomyces pombe 972h-]	2	2	19112688;19115165		HCD	1	0	1	1	2851			5.65858e+08	Light	Not Unique	Used	5.65858e+08	1228254924	2.1706	0.957831	-0.0621571
QMVVDILHPGK	Unambiguous	40S ribosomal protein S24 [Schizosaccharomyces pombe 972h-]	2	2	19112688;19115165		HCD	1	0	1	1	1632			1522267889	Light	Not Unique	Used	1522267889	3305839644	2.17165	0.958117	-0.0617263
FRLILIESRIHRLARYYRk	Unambiguous	40S ribosomal protein S13 [Schizosaccharomyces pombe 972h-]	1	1	19114812	K19(Label:13C(6)15N(2))	HCD	1	0	1	1	6840			9.04921e+06	Heavy	Unique	Used	4.04416e+06	8.7868e+06	2.17272	0.958406	-0.0612911
INVDQDTK	Unambiguous	40S ribosomal protein S17 [Schizosaccharomyces pombe 972h-]	1	1	19075512		HCD	1	0	1	1	5541			650264	Light	Unique	Used	650264	1.41292e+06	2.17284	0.95844	-0.0612398
HGRPGIGATHSSRFIPLk	Unambiguous	40S ribosomal protein S15 [Schizosaccharomyces pombe 972h-]	2	1	19075461	K18(Label:13C(6)15N(2))	HCD	1	0	1	1	682			1.22752e+09	Heavy	Unique	Used	5.64929e+08	1.22752e+09	2.17288	0.95845	-0.0612248
RVVDPFSRk	Unambiguous	40S ribosomal protein S1 [Schizosaccharomyces pombe 972h-]	2	2	19114028;19113740	K9(Label:13C(6)15N(2))	HCD	1	0	1	1	623		1	54709988	Heavy	Not Unique	Used	25157424	54709988	2.17471	0.958948	-0.0604761
AIHQALFQQGVLVAk	Unambiguous	40S ribosomal protein S10 [Schizosaccharomyces pombe 972h-]	1	1	19112397	K15(Label:13C(6)15N(2))	HCD	1	0	1	1	3837			2.97549e+07	Heavy	Unique	Used	1.30545e+07	2.84177e+07	2.17686	0.959534	-0.0595941
ATSTPNPk	Unambiguous	40S ribosomal protein S8 [Schizosaccharomyces pombe 972h-]	1	1	19115431	K8(Label:13C(6)15N(2))	HCD	1	0	1	1	2428		1	2.12841e+07	Heavy	Unique	Used	7.15698e+06	15582457	2.17724	0.959637	-0.0594393
DELERVAk	Unambiguous	40S ribosomal protein S5 [Schizosaccharomyces pombe 972h-]	2	1	19115124	K8(Label:13C(6)15N(2))	HCD	1	0	1	1	5476			5.20073e+06	Heavy	Unique	Used	2.38847e+06	5.20073e+06	2.17743	0.95969	-0.0593601
DQYVPEVSELEVDRVNVDQDTk	Unambiguous	40S ribosomal protein S17 [Schizosaccharomyces pombe 972h-]	1	1	19112037	K22(Label:13C(6)15N(2))	HCD	1	0	1	1	4054			2.39974e+09	Heavy	Unique	Used	1096819354	2388977786	2.1781	0.95987	-0.0590897
RLIDLHSPSEIVk	Unambiguous	40S ribosomal protein S20 [Schizosaccharomyces pombe 972h-]	1	1	19075936	K13(Label:13C(6)15N(2))	HCD	1	0	1	1	3553		1	8795473	Heavy	Unique	Used	4.03645e+06	8795473	2.17901	0.960119	-0.0587146
LAGEYGLRNk	Unambiguous	40S ribosomal protein S9 [Schizosaccharomyces pombe 972h-]	2	2	19112632;19113857	K10(Label:13C(6)15N(2))	HCD	1	0	1	1	2646			2.25885e+08	Heavy	Not Unique	Used	102424396	223204929	2.17922	0.960174	-0.0586322
QmVVDILHPGK	Unambiguous	40S ribosomal protein S24 [Schizosaccharomyces pombe 972h-]	2	2	19112688;19115165	M2(Oxidation)	HCD	1	0	1	1	1399			1.90826e+07	Light	Not Unique	Used	1.90826e+07	4.15926e+07	2.17961	0.96028	-0.0584729
MTTPQWIDIVK	Unambiguous	40S ribosomal protein S19 [Schizosaccharomyces pombe 972h-]	2	2	19113385;19112013		HCD	1	0	1	1	4441			1.00551e+07	Light	Not Unique	Used	1.00551e+07	21919478	2.17994	0.96037	-0.0583384
ADIDMSk	Unambiguous	40S ribosomal protein S18 [Schizosaccharomyces pombe 972h-]	1	1	19113298	K7(Label:13C(6)15N(2))	HCD	1	0	1	1	409			794008205	Heavy	Unique	Used	3.64153e+08	794008205	2.18043	0.960503	-0.0581383
AIHQALFSQGVLVAK	Unambiguous	40S ribosomal protein S10 [Schizosaccharomyces pombe 972h-]	1	1	19114930		HCD	1	0	1	1	3843			6.04579e+07	Light	Unique	Used	6.04579e+07	1.3185e+08	2.18085	0.960617	-0.0579664
SFQLLANNVDSk	Unambiguous	40S ribosomal protein S18 [Schizosaccharomyces pombe 972h-]	1	1	19113298	K12(Label:13C(6)15N(2))	HCD	1	0	1	1	6169			1.33071e+07	Heavy	Unique	Used	6.10156e+06	1.33071e+07	2.18093	0.960639	-0.0579332
ADADSVVEQILk	Unambiguous	40S ribosomal protein S13 [Schizosaccharomyces pombe 972h-]	1	1	19114812	K12(Label:13C(6)15N(2))	HCD	1	0	1	1	1841			2.62422e+06	Heavy	Unique	Used	1.16152e+06	2.5333e+06	2.18102	0.960664	-0.0578966
TTYAQSSQIRAIHQK	Unambiguous	40S ribosomal protein S1 [Schizosaccharomyces pombe 972h-]	1	1	19113740		HCD	1	0	1	1	2614			1.62865e+07	Light	Unique	Used	1.62865e+07	3.55249e+07	2.18124	0.960725	-0.0578051
VmFAMTQIk	Unambiguous	40S ribosomal protein S18 [Schizosaccharomyces pombe 972h-]	1	1	19113298	M2(Oxidation); K9(Label:13C(6)15N(2))	HCD	0.5714	0	1	1	3750			7.75921e+07	Heavy	Unique	Used	3.55202e+07	7.75921e+07	2.18445	0.961594	-0.0565002
QMVVDILHPGk	Unambiguous	40S ribosomal protein S24 [Schizosaccharomyces pombe 972h-]	2	2	19112688;19115165	K11(Label:13C(6)15N(2))	HCD	1	0	1	1	3828			298898753	Heavy	Not Unique	Used	136808299	298898753	2.1848	0.961689	-0.0563572
AIHQALFSQGVLVAk	Unambiguous	40S ribosomal protein S10 [Schizosaccharomyces pombe 972h-]	1	1	19114930	K15(Label:13C(6)15N(2))	HCD	1	0	1	1	1663			6.52865e+08	Heavy	Unique	Used	2.98617e+08	6.52865e+08	2.1863	0.962095	-0.0557493
RLFEGNAIIRRLVRLGILDETRMk	Unambiguous	40S ribosomal protein S9 [Schizosaccharomyces pombe 972h-]	1	1	19113857	K24(Label:13C(6)15N(2))	HCD	1	0	1	1	6353			1.52465e+07	Heavy	Unique	Used	6.94014e+06	1.51735e+07	2.18634	0.962108	-0.0557299
RAGELTTEELERIVTIIQNPSQFK	Unambiguous	40S ribosomal protein S18 [Schizosaccharomyces pombe 972h-]	1	1	19113298		HCD	1	0	1	1	4572			9248530524	Light	Unique	Used	9248530524	20235437952	2.18796	0.962546	-0.0550721
TRIIQVAYHPSNNELVRTNTLTk	Unambiguous	40S ribosomal protein S8 [Schizosaccharomyces pombe 972h-]	2	1	19115431	K23(Label:13C(6)15N(2))	HCD	1	0	1	1	3469			2.16992e+09	Heavy	Unique	Used	9.90731e+08	2.1685e+09	2.18879	0.962771	-0.054736
RLLGTAYK	Unambiguous	40S ribosomal protein S23 [Schizosaccharomyces pombe 972h-]	1	1	19112979		HCD	1	0	1	1	2655			3858910764	Light	Unique	Used	3858910764	8450016416	2.18974	0.963028	-0.0543505
FMTNRLLQRK	Unambiguous	40S ribosomal protein S24 [Schizosaccharomyces pombe 972h-]	2	2	19112688;19115165		HCD	1	0	1	1	6744			4.27699e+07	Light	Not Unique	Used	4.27699e+07	9.37069e+07	2.19095	0.963356	-0.0538593
LQEEERERk	Unambiguous	40S ribosomal protein S17 [Schizosaccharomyces pombe 972h-]	2	2	19075512;19112037	K9(Label:13C(6)15N(2))	HCD	1	0	1	1	127			2.03321e+09	Heavy	Not Unique	Used	9.2732e+08	2.03261e+09	2.19191	0.963616	-0.0534699
FMTNRLLQRK	Unambiguous	40S ribosomal protein S24 [Schizosaccharomyces pombe 972h-]	2	2	19112688;19115165		HCD	1	0	1	1	854			9.62103e+08	Light	Not Unique	Used	9.62103e+08	2109119277	2.1922	0.963692	-0.0533558
DISLVDYITIGnGQPLPHTAGRFQTk	Unambiguous	40S ribosomal protein S5 [Schizosaccharomyces pombe 972h-]	2	1	19115124	N12(Deamidated); K26(Label:13C(6)15N(2))	HCD	0.1795	0	1	1	4325			247286808	Heavy	Unique	Used	1.12797e+08	247286808	2.19231	0.963723	-0.0533093
LLELHGESQDVGSk	Unambiguous	40S ribosomal protein S1 [Schizosaccharomyces pombe 972h-]	1	1	19113740	K14(Label:13C(6)15N(2))	HCD	1	0	1	1	2953			6.18682e+07	Heavy	Unique	Used	27626395	6.05987e+07	2.19351	0.964047	-0.0528252
VPRRPFESARLDAELk	Unambiguous	40S ribosomal protein S9 [Schizosaccharomyces pombe 972h-]	2	2	19112632;19113857	K16(Label:13C(6)15N(2))	HCD	1	0	1	1	6778			6.16811e+07	Heavy	Not Unique	Used	2.81095e+07	6.16811e+07	2.19432	0.964265	-0.0524977
HPEVGVPNLqVIk	Unambiguous	40S ribosomal protein S10 [Schizosaccharomyces pombe 972h-]	2	2	19114930;19112397	Q10(Deamidated); K13(Label:13C(6)15N(2))	HCD	0.1186	0	1	1	3802			5.34382e+07	Heavy	Not Unique	Used	2.43357e+07	5.34382e+07	2.19588	0.964687	-0.0518665
AIHQALFSQGVLVAk	Unambiguous	40S ribosomal protein S10 [Schizosaccharomyces pombe 972h-]	1	1	19114930	K15(Label:13C(6)15N(2))	HCD	1	0	1	1	1664			3.21185e+08	Heavy	Unique	Used	1.46251e+08	3.21185e+08	2.19612	0.964753	-0.0517692
TLGNFVK	Unambiguous	40S ribosomal protein S2 [Schizosaccharomyces pombe 972h-]	1	1	19075935		HCD	1	0	1	1	1173			3.31955e+07	Light	Unique	Used	3.31955e+07	7.29088e+07	2.19635	0.964814	-0.0516779
LRSLVRk	Unambiguous	40S ribosomal protein S1 [Schizosaccharomyces pombe 972h-]	2	2	19114028;19113740	K7(Label:13C(6)15N(2))	HCD	1	0	1	1	2082			5.50947e+07	Heavy	Not Unique	Used	2.50804e+07	5.50947e+07	2.19672	0.964916	-0.0515253
INVDQDTK	Unambiguous	40S ribosomal protein S17 [Schizosaccharomyces pombe 972h-]	1	1	19075512		HCD	1	0	1	1	2526			2.59509e+08	Light	Unique	Used	2.59044e+08	569125354	2.19702	0.964996	-0.0514045
AIHQALFSQGVLVAK	Unambiguous	40S ribosomal protein S10 [Schizosaccharomyces pombe 972h-]	1	1	19114930		HCD	1	0	1	1	1768			718463	Light	Unique	Used	718463	1.5787e+06	2.19733	0.96508	-0.051279
ADADSVVEqILK	Unambiguous	40S ribosomal protein S13 [Schizosaccharomyces pombe 972h-]	1	1	19114812	Q9(Deamidated)	HCD	1	0	1	1	4423			3.5269e+07	Light	Unique	Used	3.5269e+07	7.7519e+07	2.19793	0.965242	-0.051038
VMFAmTQIk	Unambiguous	40S ribosomal protein S18 [Schizosaccharomyces pombe 972h-]	1	1	19113298	M5(Oxidation); K9(Label:13C(6)15N(2))	HCD	1	0	1	1	5895			1.01892e+08	Heavy	Unique	Used	4.63318e+07	1.01837e+08	2.19799	0.965257	-0.0510153
RALVHDGLARGIREASk	Unambiguous	40S ribosomal protein S12 [Schizosaccharomyces pombe 972h-]	2	1	19075369	K17(Label:13C(6)15N(2))	HCD	1	0	1	1	660			1.29894e+07	Heavy	Unique	Used	5.58045e+06	1.22688e+07	2.19854	0.965405	-0.0507944
AIHQALFSQGVLVAK	Unambiguous	40S ribosomal protein S10 [Schizosaccharomyces pombe 972h-]	1	1	19114930		HCD	1	0	1	1	3768			1370099467	Light	Unique	Used	1370099467	3012869325	2.19902	0.965534	-0.0506013
TDASAVQAFGLRTHYGGGRTTGFALIYDDVEAmk	Unambiguous	40S ribosomal protein S24 [Schizosaccharomyces pombe 972h-]	1	1	19115165	M33(Oxidation); K34(Label:13C(6)15N(2))	HCD	1	0	1	1	6647			8.61186e+06	Heavy	Unique	Used	3.77319e+06	8.29951e+06	2.1996	0.965692	-0.0503642
SFQLLANNVDSK	Unambiguous	40S ribosomal protein S18 [Schizosaccharomyces pombe 972h-]	1	1	19113298		HCD	1	0	1	1	4009			977921099	Light	Unique	Used	977921099	2151409421	2.19998	0.965795	-0.0502114
DISLVDYITIGnGQPLPHTAGRFQTk	Unambiguous	40S ribosomal protein S5 [Schizosaccharomyces pombe 972h-]	2	1	19115124	N12(Deamidated); K26(Label:13C(6)15N(2))	HCD	0.1408	0	1	1	4323			3.24035e+08	Heavy	Unique	Used	1.46449e+08	322279334	2.20062	0.965968	-0.0499532
TRIIQVAYHPSnNELVRTNTLTk	Unambiguous	40S ribosomal protein S8 [Schizosaccharomyces pombe 972h-]	2	1	19115431	N12(Deamidated); K23(Label:13C(6)15N(2))	HCD	0.1692	0	1	1	5962			1.9812e+06	Heavy	Unique	Used	829393	1.82567e+06	2.20121	0.966125	-0.0497179
FMTnRLLQRk	Unambiguous	40S ribosomal protein S24 [Schizosaccharomyces pombe 972h-]	2	2	19112688;19115165	N4(Deamidated); K10(Label:13C(6)15N(2))	HCD	1	0	1	1	1140			6.84715e+07	Heavy	Not Unique	Used	3.11057e+07	6.84715e+07	2.20125	0.966136	-0.0497011
QPNSAIRk	Unambiguous	40S ribosomal protein S23 [Schizosaccharomyces pombe 972h-]	1	1	19112979	K8(Label:13C(6)15N(2))	HCD	1	0	1	1	256			8.44192e+07	Heavy	Unique	Used	3.83457e+07	8.44192e+07	2.20153	0.966211	-0.0495892
IPSWFLNRQk	Unambiguous	40S ribosomal protein S18 [Schizosaccharomyces pombe 972h-]	1	1	19113298	K10(Label:13C(6)15N(2))	HCD	1	0	1	1	3771			1.11198e+10	Heavy	Unique	Used	5.04918e+09	1.11198e+10	2.2023	0.966419	-0.0492786
ELRPLQITSAREVEVGGGk	Unambiguous	40S ribosomal protein S7 [Schizosaccharomyces pombe 972h-]	1	1	19114589	K19(Label:13C(6)15N(2))	HCD	1	0	1	1	1487			4.31209e+08	Heavy	Unique	Used	1.95772e+08	4.31209e+08	2.2026	0.966502	-0.049156
IPSWFLNRQk	Unambiguous	40S ribosomal protein S18 [Schizosaccharomyces pombe 972h-]	1	1	19113298	K10(Label:13C(6)15N(2))	HCD	1	0	1	1	6063			2.93414e+06	Heavy	Unique	Used	1.30998e+06	2.88561e+06	2.20278	0.96655	-0.0490838
EYQIVDYFLPRLNDEVMk	Unambiguous	40S ribosomal protein S2 [Schizosaccharomyces pombe 972h-]	1	1	19075935	K18(Label:13C(6)15N(2))	HCD	1	0	1	1	4608			9.74959e+07	Heavy	Unique	Used	4.41708e+07	9.73311e+07	2.20352	0.966748	-0.0487881
YYPRLTLDFQTNK	Unambiguous	40S ribosomal protein S17 [Schizosaccharomyces pombe 972h-]	2	2	19075512;19112037		HCD	1	0	1	1	3971			3110865594	Light	Not Unique	Used	3110865594	6.85679e+09	2.20414	0.966916	-0.0485373
[truncated: 911 more rows]

## Sheet: ofd1Δ (H)-nro1Δ (L
Sequence	PSM Ambiguity	Protein Descriptions	# Proteins	# Protein Groups	Protein Group Accessions	Modifications	Activation Type	ΔScore	ΔCn	Rank	Search Engine Rank	QuanResultID	# Missing Channels	# Single-Peak Channels	Precursor Area	Quan Channel	Quan Info	Quan Usage	Light	Heavy	H/L (rk)	rak
[truncated: 70 more rows]
