# Supplementary material for: Prolyl dihydroxylation of unassembled uS12/Rps23 regulates fungal hypoxic adaptation
Source: eLife. 2017 Oct 30;6:e28563. doi: 10.7554/eLife.28563 (PMC5690285; doi:10.7554/eLife.28563)
Supplement: Figure 4—source data 1. — TMT data used to quantify Rps23 P62 hydroxylation in vitro shown in Figure 4C. [file elife-28563-fig4-data1.xlsx]

## Sheet: Non-P62 Peptides
Rps23 peptides (excluding P62-containing peptides)
									Signal
confidence	Sequence	Protein Group Accessions	Modifications	ΔScore	ΔCn	Rank	Search Engine Rank	QuanResultID	-Nro1	+Nro1
Low	rLLGTAYk	19112979	N-Term(TMT6plex); K8(TMT6plex)	1	0	1	1	155796	283324	181869
Low	rLLGTAYk	19112979	N-Term(TMT6plex); K8(TMT6plex)	1	0	1	1	155869	237852	174922
Low	rLLGTAYk	19112979	N-Term(TMT6plex); K8(TMT6plex)	1	0	1	1	155930	211396	149338
Low	gDIPGVRFk	19112979	N-Term(TMT6plex); K9(TMT6plex)	1	0	1	1	158478	1.28325e+06	1.30944e+06
Low	gDIPGVRFk	19112979	N-Term(TMT6plex); K9(TMT6plex)	1	0	1	1	158489	571035	487669
Low	gDIPGVRFk	19112979	N-Term(TMT6plex); K9(TMT6plex)	1	0	1	1	158543	4.40219e+06	4.38903e+06
Medium	gDIPGVRFk	19112979	N-Term(TMT6plex); K9(TMT6plex)	1	0	1	1	158561	783686	736243
Low	gDIPGVRFk	19112979	N-Term(TMT6plex); K9(TMT6plex)	1	0	1	1	158601	2.86586e+06	2285712
Medium	gDIPGVRFk	19112979	N-Term(TMT6plex); K9(TMT6plex)	1	0	1	1	158633	162710	151455
High	vAGVGLSALFHEk	19112979	N-Term(TMT6plex); K13(TMT6plex)	1	0	1	1	163999	78892.7	84567.2
High	vAGVGLSALFHEk	19112979	N-Term(TMT6plex); K13(TMT6plex)	1	0	1	1	164049	432028	517511
High	vAGVGLSALFHEk	19112979	N-Term(TMT6plex); K13(TMT6plex)	1	0	1	1	164053	198388	156904
High	vAGVGLSALFHEk	19112979	N-Term(TMT6plex); K13(TMT6plex)	1	0	1	1	164107	447961	485907
High	vAGVGLSALFHEk	19112979	N-Term(TMT6plex); K13(TMT6plex)	1	0	1	1	164109	269962	229199
High	vAGVGLSALFHEk	19112979	N-Term(TMT6plex); K13(TMT6plex)	1	0	1	1	164161	692696	679407
High	vAGVGLSALFHEk	19112979	N-Term(TMT6plex); K13(TMT6plex)	1	0	1	1	164223	186826	295947
High	vAGVGLSALFHEk	19112979	N-Term(TMT6plex); K13(TMT6plex)	1	0	1	1	164283	118808	201019
High	vAGVGLSALFHEk	19112979	N-Term(TMT6plex); K13(TMT6plex)	1	0	1	1	164351	54242.9	90569.9
High	kVTAFVPHDGCLnFVDENDEVLLSGFGRk	19112979	N-Term(TMT6plex); N13(Deamidated); K29(TMT6plex)	0.6364	0	1	1	166984	36950.2	33551.3
High	kVTAFVPHDGCLnFVDENDEVLLSGFGRk	19112979	N-Term(TMT6plex); N13(Deamidated); K29(TMT6plex)	0.5294	0	1	1	167027	57177.5	47305.1
Low	vTAFVpHDGCLNFVDENDEVLLSGFGRk	19112979	N-Term(TMT6plex); P6(Dioxidation); K28(TMT6plex)	1	0	1	1	167355	33258.5	28894.2
High	vTAFVpHDGCLNFVDENDEVLLSGFGRk	19112979	N-Term(TMT6plex); P6(Dioxidation); K28(TMT6plex)	1	0	1	1	167390	16148	11708
Low	vTAFVpHDGCLNFVDENDEVLLSGFGRk	19112979	N-Term(TMT6plex); P6(Dioxidation); K28(TMT6plex)	1	0	1	1	167412	186790	121566
High	vTAFVpHDGCLnFVDENDEVLLSGFGRk	19112979	N-Term(TMT6plex); P6(Dioxidation); N12(Deamidated); K28(TMT6plex)	0.1864	0	1	1	167470	17452.8	13455
Low	vTAFVpHDGCLNFVDEnDEVLLSGFGRk	19112979	N-Term(TMT6plex); P6(Dioxidation); N17(Deamidated); K28(TMT6plex)		0.4118	2	2	167615	16886.4	14057.7
High	sSPFGGSSHAk	19112979	N-Term(TMT6plex); K11(TMT6plex)	1	0	1	1	175096	10677.7	10406.3
High	sSPFGGSSHAk	19112979	N-Term(TMT6plex); K11(TMT6plex)	1	0	1	1	175147	35962	32595.9
High	sSPFGGSSHAk	19112979	N-Term(TMT6plex); K11(TMT6plex)	1	0	1	1	175208	17060.8	15832.4
Low	rLLGTAYk	19112979	N-Term(TMT6plex); K8(TMT6plex)	1	0	1	1	177831	50969.4	47038.3
Low	rLLGTAYk	19112979	N-Term(TMT6plex); K8(TMT6plex)	1	0	1	1	177887	55658.4	47450.9
Low	rLLGTAYk	19112979	N-Term(TMT6plex); K8(TMT6plex)	1	0	1	1	177936	19845.2	22280.7
Low	gDIPGVRFk	19112979	N-Term(TMT6plex); K9(TMT6plex)	1	0	1	1	179673	35384.7	32958.2
Medium	gDIPGVRFk	19112979	N-Term(TMT6plex); K9(TMT6plex)	1	0	1	1	179719	82335.7	72956.9
Medium	gDIPGVRFk	19112979	N-Term(TMT6plex); K9(TMT6plex)	1	0	1	1	179769	118087	114480
Low	gDIPGVRFk	19112979	N-Term(TMT6plex); K9(TMT6plex)	1	0	1	1	179814	63143.6	48276.2
Low	gDIPGVRFk	19112979	N-Term(TMT6plex); K9(TMT6plex)	1	0	1	1	179862	8809.14	7229.47
High	vAGVGLSALFHEk	19112979	N-Term(TMT6plex); K13(TMT6plex)	1	0	1	1	183168	1401.11	1769.12
High	vAGVGLSALFHEk	19112979	N-Term(TMT6plex); K13(TMT6plex)	1	0	1	1	183204	2289.12	2657.84
High	vAGVGLSALFHEk	19112979	N-Term(TMT6plex); K13(TMT6plex)	1	0	1	1	183236	514.558	2113.09
High	sSPFGGSSHAk	19112979	N-Term(TMT6plex); K11(TMT6plex)	1	0	1	1	189849	308414	255192
High	sSPFGGSSHAk	19112979	N-Term(TMT6plex); K11(TMT6plex)	1	0	1	1	189865	91086.6	71206.8
High	sSPFGGSSHAk	19112979	N-Term(TMT6plex); K11(TMT6plex)	1	0	1	1	189918	2.02319e+06	1.82579e+06
High	sSPFGGSSHAk	19112979	N-Term(TMT6plex); K11(TMT6plex)	1	0	1	1	189933	354553	289899
High	sSPFGGSSHAk	19112979	N-Term(TMT6plex); K11(TMT6plex)	1	0	1	1	189979	2641994	2.02339e+06
High	sSPFGGSSHAk	19112979	N-Term(TMT6plex); K11(TMT6plex)	1	0	1	1	189993	385168	235372
High	sSPFGGSSHAk	19112979	N-Term(TMT6plex); K11(TMT6plex)	1	0	1	1	190051	467225	318752
High	sSPFGGSSHAk	19112979	N-Term(TMT6plex); K11(TMT6plex)	1	0	1	1	190114	42897.5	71415.7
Low	rLLGTAYk	19112979	N-Term(TMT6plex); K8(TMT6plex)	1	0	1	1	193980	6668052	5789333
Medium	rLLGTAYk	19112979	N-Term(TMT6plex); K8(TMT6plex)	1	0	1	1	193981	1445079	1.33295e+06
Low	rLLGTAYk	19112979	N-Term(TMT6plex); K8(TMT6plex)	1	0	1	1	194053	15234588	13139256
High	rLLGTAYk	19112979	N-Term(TMT6plex); K8(TMT6plex)	1	0	1	1	194054	3.77335e+06	4261982
Low	rLLGTAYk	19112979	N-Term(TMT6plex); K8(TMT6plex)	1	0	1	1	194113	5883291	5904353
Low	rLLGTAYk	19112979	N-Term(TMT6plex); K8(TMT6plex)	1	0	1	1	194115	1.58045e+06	1613841
Low	rLLGTAYk	19112979	N-Term(TMT6plex); K8(TMT6plex)	1	0	1	1	194173	3.16458e+06	2.3478e+06
High	rLLGTAYk	19112979	N-Term(TMT6plex); K8(TMT6plex)	1	0	1	1	194186	527452	415442
Low	rLLGTAYk	19112979	N-Term(TMT6plex); K8(TMT6plex)	1	0	1	1	194234	1.00406e+06	918541
Medium	rLLGTAYk	19112979	N-Term(TMT6plex); K8(TMT6plex)	1	0	1	1	194247	101707	101079
Low	rLLGTAYk	19112979	N-Term(TMT6plex); K8(TMT6plex)	1	0	1	1	194617	32521.2	29180.3
Low	gDIPGVRFk	19112979	N-Term(TMT6plex); K9(TMT6plex)	1	0	1	1	196306	96476.3	95314.4
Medium	gDIPGVRFk	19112979	N-Term(TMT6plex); K9(TMT6plex)	1	0	1	1	196335	67516.4	70800.3
Low	gDIPGVRFk	19112979	N-Term(TMT6plex); K9(TMT6plex)	1	0	1	1	196355	2.4073e+06	1957742
Low	gDIPGVRFk	19112979	N-Term(TMT6plex); K9(TMT6plex)	1	0	1	1	196400	689284	780971
Low	gDIPGVRFk	19112979	N-Term(TMT6plex); K9(TMT6plex)	1	0	1	1	196413	8749056	8307023
Low	gDIPGVRFk	19112979	N-Term(TMT6plex); K9(TMT6plex)	1	0	1	1	196459	753183	756377
Low	gDIPGVRFk	19112979	N-Term(TMT6plex); K9(TMT6plex)	1	0	1	1	196472	6.85943e+06	6330992
Low	gDIPGVRFk	19112979	N-Term(TMT6plex); K9(TMT6plex)	1	0	1	1	196521	310710	269203
Medium	gDIPGVRFk	19112979	N-Term(TMT6plex); K9(TMT6plex)	1	0	1	1	196536	3.68132e+06	2783005
Low	gDIPGVRFk	19112979	N-Term(TMT6plex); K9(TMT6plex)	1	0	1	1	196580	146481	145340
Low	gDIPGVRFk	19112979	N-Term(TMT6plex); K9(TMT6plex)	1	0	1	1	196594	2.20469e+06	2.05276e+06
Low	gDIPGVRFk	19112979	N-Term(TMT6plex); K9(TMT6plex)	1	0	1	1	196641	71854.6	71750.2
Medium	gDIPGVRFk	19112979	N-Term(TMT6plex); K9(TMT6plex)	1	0	1	1	196654	1.27586e+06	1.15619e+06
Low	gDIPGVRFk	19112979	N-Term(TMT6plex); K9(TMT6plex)	1	0	1	1	196704	37699.6	33158
Low	gDIPGVRFk	19112979	N-Term(TMT6plex); K9(TMT6plex)	1	0	1	1	196714	586307	584214
Low	gDIPGVRFk	19112979	N-Term(TMT6plex); K9(TMT6plex)	1	0	1	1	196777	169319	157700
Low	gDIPGVRFk	19112979	N-Term(TMT6plex); K9(TMT6plex)	1	0	1	1	196876	30684.4	18101.1
Low	vAGVGLSALFHEk	19112979	N-Term(TMT6plex); K13(TMT6plex)	1	0	1	1	198370	4918.95	4201.05
Low	vAGVGLSALFHEk	19112979	N-Term(TMT6plex); K13(TMT6plex)	1	0	1	1	198430	3750.29	3863.19
High	vAGVGLSALFHEk	19112979	N-Term(TMT6plex); K13(TMT6plex)	1	0	1	1	200910	6260.57	14126.9
High	vAGVGLSALFHEk	19112979	N-Term(TMT6plex); K13(TMT6plex)	1	0	1	1	200963	114546	123529
High	vAGVGLSALFHEk	19112979	N-Term(TMT6plex); K13(TMT6plex)	1	0	1	1	200970	3657.78	3419.76
High	vAGVGLSALFHEk	19112979	N-Term(TMT6plex); K13(TMT6plex)	1	0	1	1	200999	3218.37	2436.47
High	vAGVGLSALFHEk	19112979	N-Term(TMT6plex); K13(TMT6plex)	1	0	1	1	201008	117509	116815
High	vAGVGLSALFHEk	19112979	N-Term(TMT6plex); K13(TMT6plex)	1	0	1	1	201053	20721.5	22079.9
High	sSpFGGSSHAk	19112979	N-Term(TMT6plex); P3(Oxidation); K11(TMT6plex)	1	0	1	1	207239	1417.63	677.059
Low	sSPFGGSSHAk	19112979	N-Term(TMT6plex); K11(TMT6plex)	1	0	1	1	207291	2332.78	2802.56
High	sSPFGGSSHAk	19112979	N-Term(TMT6plex); K11(TMT6plex)	1	0	1	1	207333	3172.08	2305.27
High	sSPFGGSSHAk	19112979	N-Term(TMT6plex); K11(TMT6plex)	1	0	1	1	207367	3747.54	3981.19
High	sSPFGGSSHAk	19112979	N-Term(TMT6plex); K11(TMT6plex)	1	0	1	1	207382	3311.52	2824.15
High	sSPFGGSSHAk	19112979	N-Term(TMT6plex); K11(TMT6plex)	1	0	1	1	207410	1940.55	2300.45
Low	sSPFGGSSHAk	19112979	N-Term(TMT6plex); K11(TMT6plex)	1	0	1	1	207421	1858.31	2946.32
Low	sSpFGGSSHAk	19112979	N-Term(TMT6plex); P3(Oxidation); K11(TMT6plex)	1	0	1	1	207741	2875.07	2692.87
Low	lRNHRREERWADAHYk	19112979	N-Term(TMT6plex); K16(TMT6plex)	1	0	1	1	208821	4173.38	4110.94
High	sSPFGGSSHAk	19112979	N-Term(TMT6plex); K11(TMT6plex)	1	0	1	1	209026	67888.9	56159.5
High	sSPFGGSSHAk	19112979	N-Term(TMT6plex); K11(TMT6plex)	1	0	1	1	209073	7371.95	5387.06
High	sSPFGGSSHAk	19112979	N-Term(TMT6plex); K11(TMT6plex)	1	0	1	1	209081	356119	350223
High	sSPFGGSSHAk	19112979	N-Term(TMT6plex); K11(TMT6plex)	1	0	1	1	209132	8753.76	7912.58
Low	rLLGTAYk	19112979	N-Term(TMT6plex); K8(TMT6plex)	1	0	1	1	211089	374992	314067
Low	rLLGTAYk	19112979	N-Term(TMT6plex); K8(TMT6plex)	1	0	1	1	211155	8.07415e+06	7.5762e+06
Low	rLLGTAYk	19112979	N-Term(TMT6plex); K8(TMT6plex)	1	0	1	1	211158	4879513	4.86668e+06
Low	rLLGTAYk	19112979	N-Term(TMT6plex); K8(TMT6plex)	1	0	1	1	211215	2.10039e+06	2.08632e+06
Low	rLLGTAYk	19112979	N-Term(TMT6plex); K8(TMT6plex)	1	0	1	1	211273	182533	193611
Low	rLLGTAYk	19112979	N-Term(TMT6plex); K8(TMT6plex)	1	0	1	1	211338	79184.1	67333.1
Low	rLLGTAYk	19112979	N-Term(TMT6plex); K8(TMT6plex)	1	0	1	1	211724	36064.7	31477.2
Low	gDIPGVRFk	19112979	N-Term(TMT6plex); K9(TMT6plex)	1	0	1	1	212462	549355	543554
Low	gDIPGVRFk	19112979	N-Term(TMT6plex); K9(TMT6plex)	1	0	1	1	212511	1.07029e+06	916443
Low	gDIPGVRFk	19112979	N-Term(TMT6plex); K9(TMT6plex)	1	0	1	1	212519	1.89057e+06	1.96647e+06
Low	gDIPGVRFk	19112979	N-Term(TMT6plex); K9(TMT6plex)	1	0	1	1	212580	1.33784e+06	1.57652e+06
Low	gDIPGVRFk	19112979	N-Term(TMT6plex); K9(TMT6plex)	1	0	1	1	212647	230342	184077
Low	vAGVGLSALFHEk	19112979	N-Term(TMT6plex); K13(TMT6plex)	1	0	1	1	213403	85196.6	61221.4
Low	vAGVGLSALFHEk	19112979	N-Term(TMT6plex); K13(TMT6plex)	1	0	1	1	213416	46270	65630.3
High	vAGVGLSALFHEk	19112979	N-Term(TMT6plex); K13(TMT6plex)	1	0	1	1	216393	285489	295512
High	vAGVGLSALFHEk	19112979	N-Term(TMT6plex); K13(TMT6plex)	1	0	1	1	216409	527225	372941
High	vAGVGLSALFHEk	19112979	N-Term(TMT6plex); K13(TMT6plex)	1	0	1	1	216465	12347417	16224182
High	vAGVGLSALFHEk	19112979	N-Term(TMT6plex); K13(TMT6plex)	1	0	1	1	216481	3929035	4.13167e+06
High	vAGVGLSALFHEk	19112979	N-Term(TMT6plex); K13(TMT6plex)	1	0	1	1	216541	8632890	8795924
High	vAGVGLSALFHEk	19112979	N-Term(TMT6plex); K13(TMT6plex)	1	0	1	1	216556	2.03358e+06	1.56308e+06
High	vAGVGLSALFHEk	19112979	N-Term(TMT6plex); K13(TMT6plex)	1	0	1	1	216617	663980	673514
High	vAGVGLSALFHEk	19112979	N-Term(TMT6plex); K13(TMT6plex)	1	0	1	1	216637	296689	285579
High	vAGVGLSALFHEk	19112979	N-Term(TMT6plex); K13(TMT6plex)	1	0	1	1	216692	194699	241686
High	vAGVGLSALFHEk	19112979	N-Term(TMT6plex); K13(TMT6plex)	1	0	1	1	216766	128578	149834
High	vAGVGLSALFHEk	19112979	N-Term(TMT6plex); K13(TMT6plex)	1	0	1	1	216833	63073.5	57096.5
High	vAGVGLSALFHEk	19112979	N-Term(TMT6plex); K13(TMT6plex)	1	0	1	1	216903	84874.9	89500
High	vAGVGLSALFHEk	19112979	N-Term(TMT6plex); K13(TMT6plex)	1	0	1	1	216973	103731	113384
High	vAGVGLSALFHEk	19112979	N-Term(TMT6plex); K13(TMT6plex)	1	0	1	1	216996	146889	92646.5
High	vAGVGLSALFHEk	19112979	N-Term(TMT6plex); K13(TMT6plex)	1	0	1	1	217046	100082	87384.5
High	vAGVGLSALFHEk	19112979	N-Term(TMT6plex); K13(TMT6plex)	1	0	1	1	217066	134452	114361
High	vAGVGLSALFHEk	19112979	N-Term(TMT6plex); K13(TMT6plex)	1	0	1	1	217107	276059	236790
High	vAGVGLSALFHEk	19112979	N-Term(TMT6plex); K13(TMT6plex)	1	0	1	1	217138	172234	133291
High	vAGVGLSALFHEk	19112979	N-Term(TMT6plex); K13(TMT6plex)	1	0	1	1	217182	210889	250849
Medium	vAGVGLSALFHEk	19112979	N-Term(TMT6plex); K13(TMT6plex)	1	0	1	1	217213	188960	174204
High	vAGVGLSALFHEk	19112979	N-Term(TMT6plex); K13(TMT6plex)	1	0	1	1	217257	190491	171605
High	vAGVGLSALFHEk	19112979	N-Term(TMT6plex); K13(TMT6plex)	1	0	1	1	217332	308625	362726
High	vAGVGLSALFHEk	19112979	N-Term(TMT6plex); K13(TMT6plex)	1	0	1	1	217405	173986	166710
High	vAGVGLSALFHEk	19112979	N-Term(TMT6plex); K13(TMT6plex)	1	0	1	1	217478	144810	139181
High	vAGVGLSALFHEk	19112979	N-Term(TMT6plex); K13(TMT6plex)	1	0	1	1	217547	209367	251251
High	vAGVGLSALFHEk	19112979	N-Term(TMT6plex); K13(TMT6plex)	1	0	1	1	217607	202692	174029
High	vAGVGLSALFHEk	19112979	N-Term(TMT6plex); K13(TMT6plex)	1	0	1	1	217668	306541	228055
High	vAGVGLSALFHEk	19112979	N-Term(TMT6plex); K13(TMT6plex)	1	0	1	1	217745	219384	211379
High	vAGVGLSALFHEk	19112979	N-Term(TMT6plex); K13(TMT6plex)	1	0	1	1	217820	215035	206799
High	vAGVGLSALFHEk	19112979	N-Term(TMT6plex); K13(TMT6plex)	1	0	1	1	217896	159421	171750
High	vAGVGLSALFHEk	19112979	N-Term(TMT6plex); K13(TMT6plex)	1	0	1	1	217973	118548	155797
High	vAGVGLSALFHEk	19112979	N-Term(TMT6plex); K13(TMT6plex)	1	0	1	1	218055	107034	81725.5
High	vAGVGLSALFHEk	19112979	N-Term(TMT6plex); K13(TMT6plex)	1	0	1	1	218158	94183.6	107901
High	vAGVGLSALFHEk	19112979	N-Term(TMT6plex); K13(TMT6plex)	1	0	1	1	218238	67216.4	56582.2
High	vAGVGLSALFHEk	19112979	N-Term(TMT6plex); K13(TMT6plex)	1	0	1	1	218315	53428	45554.6
High	vAGVGLSALFHEk	19112979	N-Term(TMT6plex); K13(TMT6plex)	1	0	1	1	218399	56001	74097.2
High	vAGVGLSALFHEk	19112979	N-Term(TMT6plex); K13(TMT6plex)	1	0	1	1	218479	63822.9	66880.9
High	vAGVGLSALFHEk	19112979	N-Term(TMT6plex); K13(TMT6plex)	1	0	1	1	218546	65438.8	63771.9
High	vAGVGLSALFHEk	19112979	N-Term(TMT6plex); K13(TMT6plex)	1	0	1	1	218793	73378.6	60792.7
High	vAGVGLSALFHEk	19112979	N-Term(TMT6plex); K13(TMT6plex)	1	0	1	1	218883	45964.9	39299.7
High	vAGVGLSALFHEk	19112979	N-Term(TMT6plex); K13(TMT6plex)	1	0	1	1	218955	73560.8	63819.2
High	vAGVGLSALFHEk	19112979	N-Term(TMT6plex); K13(TMT6plex)	1	0	1	1	219137	35143.6	41779.4
High	vAGVGLSALFHEk	19112979	N-Term(TMT6plex); K13(TMT6plex)	1	0	1	1	219391	36019.4	34239.2
High	vAGVGLSALFHEk	19112979	N-Term(TMT6plex); K13(TMT6plex)	1	0	1	1	219466	44913.8	51531.2
High	vAGVGLSALFHEk	19112979	N-Term(TMT6plex); K13(TMT6plex)	1	0	1	1	219538	58953.4	68348.4
High	vAGVGLSALFHEk	19112979	N-Term(TMT6plex); K13(TMT6plex)	1	0	1	1	219705	41234.3	36266.6
High	vAGVGLSALFHEk	19112979	N-Term(TMT6plex); K13(TMT6plex)	1	0	1	1	219887	49046	46969
High	vAGVGLSALFHEk	19112979	N-Term(TMT6plex); K13(TMT6plex)	1	0	1	1	219957	38528.2	30100.3
High	vAGVGLSALFHEk	19112979	N-Term(TMT6plex); K13(TMT6plex)	1	0	1	1	220033	57427.9	67302.4
High	vAGVGLSALFHEk	19112979	N-Term(TMT6plex); K13(TMT6plex)	1	0	1	1	220158	61540.1	59351.4
High	vAGVGLSALFHEk	19112979	N-Term(TMT6plex); K13(TMT6plex)	1	0	1	1	220226	56723.6	61354
High	vAGVGLSALFHEk	19112979	N-Term(TMT6plex); K13(TMT6plex)	1	0	1	1	220349	58211.8	57252.7
High	vAGVGLSALFHEk	19112979	N-Term(TMT6plex); K13(TMT6plex)	1	0	1	1	220471	52772.6	47588.4
High	vAGVGLSALFHEk	19112979	N-Term(TMT6plex); K13(TMT6plex)	1	0	1	1	220560	67774.2	62247.9
High	kVTAFVPHDGCLnFVDENDEVLLSGFGRk	19112979	N-Term(TMT6plex); N13(Deamidated); K29(TMT6plex)	0.7407	0	1	1	220661	143915	121623
High	vAGVGLSALFHEk	19112979	N-Term(TMT6plex); K13(TMT6plex)	1	0	1	1	220891	35715.7	37633.2
High	vTAFVpHDGCLnFVDENDEVLLSGFGRk	19112979	N-Term(TMT6plex); P6(Dioxidation); N12(Deamidated); K28(TMT6plex)	0.413	0	1	1	221013	53526.3	48428.6
Low	vTAFVpHDGCLNFVDENDEVLLSGFGRk	19112979	N-Term(TMT6plex); P6(Oxidation); K28(TMT6plex)	1	0	1	1	221055	50726.9	54393.9
High	vTAFVpHDGCLNFVDENDEVLLSGFGRk	19112979	N-Term(TMT6plex); P6(Dioxidation); K28(TMT6plex)	1	0	1	1	221075	210523	214321
High	vTAFVpHDGCLnFVDENDEVLLSGFGRk	19112979	N-Term(TMT6plex); P6(Dioxidation); N12(Deamidated); K28(TMT6plex)	0.3784	0	1	1	221077	97595	76901.7
High	vTAFVpHDGCLNFVDENDEVLLSGFGRk	19112979	N-Term(TMT6plex); P6(Dioxidation); K28(TMT6plex)	1	0	1	1	221149	172483	188270
High	vTAFVpHDGCLNFVDENDEVLLSGFGRk	19112979	N-Term(TMT6plex); P6(Dioxidation); K28(TMT6plex)	1	0	1	1	221160	51693.9	38764.5
High	vAGVGLSALFHEk	19112979	N-Term(TMT6plex); K13(TMT6plex)	1	0	1	1	221806	23823.8	23645.4
High	vAGVGLSALFHEk	19112979	N-Term(TMT6plex); K13(TMT6plex)	1	0	1	1	222073	22532.6	22473.1
High	vAGVGLSALFHEk	19112979	N-Term(TMT6plex); K13(TMT6plex)	1	0	1	1	227185	1549.63	2252.67
High	vAGVGLSALFHEk	19112979	N-Term(TMT6plex); K13(TMT6plex)	1	0	1	1	227246	1700.53	1559.41
High	vAGVGLSALFHEk	19112979	N-Term(TMT6plex); K13(TMT6plex)	1	0	1	1	227307	2027.76	1669.32
High	vAGVGLSALFHEk	19112979	N-Term(TMT6plex); K13(TMT6plex)	1	0	1	1	227353	1503.58	860.494
Low	vAGVGLSALFHEk	19112979	N-Term(TMT6plex); K13(TMT6plex)	1	0	1	1	227400	378.748	413.777
High	vAGVGLSALFHEk	19112979	N-Term(TMT6plex); K13(TMT6plex)	1	0	1	1	227449	734.301	640.608
High	vAGVGLSALFHEk	19112979	N-Term(TMT6plex); K13(TMT6plex)	1	0	1	1	227496	264.927	786.957
Medium	vAGVGLSALFHEk	19112979	N-Term(TMT6plex); K13(TMT6plex)	1	0	1	1	227539	596.247	750.998
High	vAGVGLSALFHEk	19112979	N-Term(TMT6plex); K13(TMT6plex)	1	0	1	1	227583	532.755	1275.3
Low	vAGVGLSALFHEk	19112979	N-Term(TMT6plex); K13(TMT6plex)	1	0	1	1	227620	264.927	690.255
Low	vAGVGLSALFHEk	19112979	N-Term(TMT6plex); K13(TMT6plex)	1	0	1	1	227697	264.927	264.927
High	vAGVGLSALFHEk	19112979	N-Term(TMT6plex); K13(TMT6plex)	1	0	1	1	227728	437.536	264.927
										0.964259	= f

## Sheet: P62 Peptides
Dihydroxylated P62-containing peptides
										Signal
Sequence	Protein Group Accessions	Modifications	Activation Type	ΔScore	ΔCn	Rank	Search Engine Rank	QuanResultID	-Nro1	+Nro1	+Nro1/-Nro1	(+Nro1/-Nro1/f)	log2 transformed
qpNSAIRk	19112979	N-Term(TMT6plex); P2(Dioxidation); K8(TMT6plex)	HCD	1	0	1	1	3385	56790	76310	1.34372	1.39353	0.478742
qpNSAIRk	19112979	N-Term(TMT6plex); P2(Dioxidation); K8(TMT6plex)	HCD	1	0	1	1	3396	25460	36240	1.42341	1.47617	0.561857
qpNSAIRk	19112979	N-Term(TMT6plex); P2(Dioxidation); K8(TMT6plex)	HCD	1	0	1	1	3419	6762	10600	1.56758	1.62569	0.701049
qpNSAIRk	19112979	N-Term(TMT6plex); P2(Dioxidation); K8(TMT6plex)	HCD	1	0	1	1	3382	4324	7322	1.69334	1.7561	0.812378
qpNSAIRk	19112979	N-Term(TMT6plex); P2(Dioxidation); K8(TMT6plex)	HCD	1	0	1	1	3397	31110	48250	1.55095	1.60843	0.685657
qpNSAIRk	19112979	N-Term(TMT6plex); P2(Dioxidation); K8(TMT6plex)	HCD	1	0	1	1	3399	10360	18050	1.74228	1.80686	0.853482
qpNSAIRk	19112979	N-Term(TMT6plex); P2(Dioxidation); K8(TMT6plex)	HCD	1	0	1	1	206932	62039	86034.3	1.38678	1.43818	0.524243
											average	1.58642
Monohydroxylated P62-containing peptides
										Signal
Sequence	Protein Group Accessions	Modifications	Activation Type	ΔScore	ΔCn	Rank	Search Engine Rank	QuanResultID	-Nro1	+Nro1	+Nro1/-Nro1	(+Nro1/-Nro1/f)	log2 transformed
qpNSAIRk	19112979	N-Term(TMT6plex); P2(Oxidation); K8(TMT6plex)	HCD	1	0	1	1	3463	15280	8347	0.54627	0.566517	-0.819808
qpNSAIRk	19112979	N-Term(TMT6plex); P2(Oxidation); K8(TMT6plex)	HCD	1	0	1	1	3465	20460	11680	0.57087	0.592029	-0.756259
qpNSAIRk	19112979	N-Term(TMT6plex); P2(Oxidation); K8(TMT6plex)	HCD	1	0	1	1	3467	12310	6697	0.544029	0.564194	-0.825737
qpNSAIRk	19112979	N-Term(TMT6plex); P2(Oxidation); K8(TMT6plex)	HCD	1	0	1	1	3470	52840	27000	0.510977	0.529916	-0.916164
qpNSAIRk	19112979	N-Term(TMT6plex); P2(Oxidation); K8(TMT6plex)	HCD	1	0	1	1	3471	58770	31760	0.540412	0.560442	-0.835362
qpNSAIRk	19112979	N-Term(TMT6plex); P2(Oxidation); K8(TMT6plex)	HCD	1	0	1	1	3474	5485	3223	0.587603	0.609382	-0.714581
qpNSAIRk	19112979	N-Term(TMT6plex); P2(Oxidation); K8(TMT6plex)	HCD	1	0	1	1	3476	101800	55310	0.54332	0.563459	-0.827619
qpNSAIRk	19112979	N-Term(TMT6plex); P2(Oxidation); K8(TMT6plex)	HCD	1	0	1	1	3478	126100	66480	0.527201	0.546741	-0.871069
qpNSAIRk	19112979	N-Term(TMT6plex); P2(Oxidation); K8(TMT6plex)	HCD	1	0	1	1	3481	4165	2527	0.606723	0.629211	-0.668384
qpNSAIRk	19112979	N-Term(TMT6plex); P2(Oxidation); K8(TMT6plex)	HCD	1	0	1	1	3483	178200	91770	0.514983	0.534071	-0.904896
qpNSAIRk	19112979	N-Term(TMT6plex); P2(Oxidation); K8(TMT6plex)	HCD	1	0	1	1	3487	90940	50180	0.551792	0.572245	-0.805296
qpNSAIRk	19112979	N-Term(TMT6plex); P2(Oxidation); K8(TMT6plex)	HCD	1	0	1	1	3489	25770	12040	0.46721	0.484527	-1.04535
qpNSAIRk	19112979	N-Term(TMT6plex); P2(Oxidation); K8(TMT6plex)	HCD	1	0	1	1	3490	17760	9592	0.54009	0.560109	-0.836221
qpNSAIRk	19112979	N-Term(TMT6plex); P2(Oxidation); K8(TMT6plex)	HCD	1	0	1	1	3491	178800	94510	0.528579	0.548171	-0.867301
qpNSAIRk	19112979	N-Term(TMT6plex); P2(Oxidation); K8(TMT6plex)	HCD	1	0	1	1	3492	250100	125700	0.502599	0.521228	-0.940014
qpNSAIRk	19112979	N-Term(TMT6plex); P2(Oxidation); K8(TMT6plex)	HCD	1	0	1	1	3496	263900	139100	0.527094	0.54663	-0.871362
qpNSAIRk	19112979	N-Term(TMT6plex); P2(Oxidation); K8(TMT6plex)	HCD	1	0	1	1	3498	301500	160700	0.533002	0.552758	-0.855281
qpNSAIRk	19112979	N-Term(TMT6plex); P2(Oxidation); K8(TMT6plex)	HCD	1	0	1	1	3506	263100	137400	0.522235	0.541592	-0.884723
qpNSAIRk	19112979	N-Term(TMT6plex); P2(Oxidation); K8(TMT6plex)	HCD	1	0	1	1	3508	24050	10900	0.453222	0.470021	-1.0892
qpNSAIRk	19112979	N-Term(TMT6plex); P2(Oxidation); K8(TMT6plex)	HCD	1	0	1	1	3510	187800	95750	0.509851	0.528749	-0.919346
qpNSAIRk	19112979	N-Term(TMT6plex); P2(Oxidation); K8(TMT6plex)	HCD	1	0	1	1	3514	160800	83120	0.516915	0.536075	-0.899493
qpNSAIRk	19112979	N-Term(TMT6plex); P2(Oxidation); K8(TMT6plex)	HCD	1	0	1	1	3516	50140	27690	0.552254	0.572723	-0.80409
qpNSAIRk	19112979	N-Term(TMT6plex); P2(Oxidation); K8(TMT6plex)	HCD	1	0	1	1	3520	104600	53580	0.512237	0.531223	-0.91261
qpNSAIRk	19112979	N-Term(TMT6plex); P2(Oxidation); K8(TMT6plex)	HCD	1	0	1	1	3522	10070	5750	0.571003	0.592167	-0.755923
qpNSAIRk	19112979	N-Term(TMT6plex); P2(Oxidation); K8(TMT6plex)	HCD	1	0	1	1	3526	6932	4031	0.581506	0.60306	-0.729627
qpNSAIRk	19112979	N-Term(TMT6plex); P2(Oxidation); K8(TMT6plex)	HCD	1	0	1	1	3528	63060	34710	0.550428	0.57083	-0.808867
qpNSAIRk	19112979	N-Term(TMT6plex); P2(Oxidation); K8(TMT6plex)	HCD	1	0	1	1	3532	47510	24080	0.506841	0.525627	-0.927889
qpNSAIRk	19112979	N-Term(TMT6plex); P2(Oxidation); K8(TMT6plex)	HCD	1	0	1	1	3534	3405	1497	0.439648	0.455943	-1.13307
qpNSAIRk	19112979	N-Term(TMT6plex); P2(Oxidation); K8(TMT6plex)	HCD	1	0	1	1	3536	32970	16450	0.498938	0.517432	-0.95056
qpNSAIRk	19112979	N-Term(TMT6plex); P2(Oxidation); K8(TMT6plex)	HCD	1	0	1	1	3540	22490	12560	0.55847	0.57917	-0.787941
qpNSAIRk	19112979	N-Term(TMT6plex); P2(Oxidation); K8(TMT6plex)	HCD	1	0	1	1	3545	12720	7129	0.560456	0.581229	-0.78282
qpnSAIRk	19112979	N-Term(TMT6plex); P2(Oxidation); N3(Deamidated); K8(TMT6plex)	HCD	1	0	1	1	3634	12550	6518	0.519363	0.538613	-0.892679
qpnSAIRk	19112979	N-Term(TMT6plex); P2(Oxidation); N3(Deamidated); K8(TMT6plex)	HCD	1	0	1	1	3636	12310	6575	0.534119	0.553916	-0.852261
qpnSAIRk	19112979	N-Term(TMT6plex); P2(Oxidation); N3(Deamidated); K8(TMT6plex)	HCD	1	0	1	1	3640	20350	10340	0.508108	0.526941	-0.924286
qpNSAIRk	19112979	N-Term(TMT6plex); P2(Oxidation); K8(TMT6plex)	HCD	1	0	1	1	3680	1758	1891	1.07565	1.11552	0.157721
qpNSAIRk	19112979	N-Term(TMT6plex); P2(Oxidation); K8(TMT6plex)	HCD	1	0	1	1	3690	5871	5315	0.905297	0.938852	-0.0910299
qpNSAIRk	19112979	N-Term(TMT6plex); P2(Oxidation); K8(TMT6plex)	HCD	1	0	1	1	3702	6930	5596	0.807504	0.837434	-0.255953
qpNSAIRk	19112979	N-Term(TMT6plex); P2(Oxidation); K8(TMT6plex)	HCD	1	0	1	1	3720	4404	4278	0.97139	1.00739	0.0106287
qpNSAIRk	19112979	N-Term(TMT6plex); P2(Oxidation); K8(TMT6plex)	HCD	1	0	1	1	173421	78219.2	43095.9	0.550964	0.571386	-0.807463
qpNSAIRk	19112979	N-Term(TMT6plex); P2(Oxidation); K8(TMT6plex)	HCD	1	0	1	1	173466	58803.4	30956.2	0.526434	0.545947	-0.873168
qpNSAIRk	19112979	N-Term(TMT6plex); P2(Oxidation); K8(TMT6plex)	HCD	1	0	1	1	173511	19292.1	8428.72	0.4369	0.453094	-1.14212
qpnSAIRk	19112979	N-Term(TMT6plex); P2(Oxidation); N3(Deamidated); K8(TMT6plex)	HCD	1	0	1	1	173783	16612.6	8875.99	0.534292	0.554096	-0.851792
qpNSAIRk	19112979	N-Term(TMT6plex); P2(Oxidation); K8(TMT6plex)	HCD	1	0	1	1	188932	14352.7	8092.79	0.563853	0.584752	-0.774103
qpNSAIRk	19112979	N-Term(TMT6plex); P2(Oxidation); K8(TMT6plex)	HCD	1	0	1	1	188975	68740.7	37265.8	0.542122	0.562215	-0.830805
qpNSAIRk	19112979	N-Term(TMT6plex); P2(Oxidation); K8(TMT6plex)	HCD	1	0	1	1	189065	45037.4	30096.9	0.668265	0.693035	-0.529001
qpNSAIRk	19112979	N-Term(TMT6plex); P2(Oxidation); K8(TMT6plex)	HCD	1	0	1	1	207277	150995	78336.2	0.5188	0.53803	-0.894242
qpNSAIRk	19112979	N-Term(TMT6plex); P2(Oxidation); K8(TMT6plex)	HCD	1	0	1	1	207321	371240	186310	0.50186	0.520462	-0.942136
qpNSAIRk	19112979	N-Term(TMT6plex); P2(Oxidation); K8(TMT6plex)	HCD	1	0	1	1	207406	50075.8	27837.5	0.555908	0.576513	-0.794574
qpNSAIRk	19112979	N-Term(TMT6plex); P2(Oxidation); K8(TMT6plex)	HCD	1	0	1	1	207810	9207.24	8882.81	0.964763	1.00052	0.000753502
											average	0.596045
Unmodified P62-containing peptides
										Signal
Sequence	Protein Group Accessions	Modifications	Activation Type	ΔScore	ΔCn	Rank	Search Engine Rank	QuanResultID	-Nro1	+Nro1	+Nro1/-Nro1	(+Nro1/-Nro1/f)	log2 transformed
qPNSAIRk	19112979	N-Term(TMT6plex); K8(TMT6plex)	HCD	1	0	1	1	3621	4944	5000	1.01133	1.04881	0.068756
qPNSAIRk	19112979	N-Term(TMT6plex); K8(TMT6plex)	HCD	1	0	1	1	3625	9840	7822	0.794919	0.824383	-0.278614
qPNSAIRk	19112979	N-Term(TMT6plex); K8(TMT6plex)	HCD	1	0	1	1	3630	12130	11600	0.956307	0.991752	-0.0119481
qPNSAIRk	19112979	N-Term(TMT6plex); K8(TMT6plex)	HCD	1	0	1	1	3635	21260	15270	0.71825	0.744872	-0.424935
qPNSAIRk	19112979	N-Term(TMT6plex); K8(TMT6plex)	HCD	1	0	1	1	3637	2645	2217	0.838185	0.869253	-0.202152
qPNSAIRk	19112979	N-Term(TMT6plex); K8(TMT6plex)	HCD	1	0	1	1	3639	13560	10740	0.792035	0.821392	-0.283857
qPNSAIRk	19112979	N-Term(TMT6plex); K8(TMT6plex)	HCD	1	0	1	1	3641	6373	5442	0.853915	0.885566	-0.175329
qPNSAIRk	19112979	N-Term(TMT6plex); K8(TMT6plex)	HCD	1	0	1	1	3643	2722	2356	0.86554	0.897622	-0.155821
qPNSAIRk	19112979	N-Term(TMT6plex); K8(TMT6plex)	HCD	1	0	1	1	3647	5712	4342	0.760154	0.788329	-0.34313
qPNSAIRk	19112979	N-Term(TMT6plex); K8(TMT6plex)	HCD	1	0	1	1	3649	1918	1680	0.875912	0.908378	-0.138635
qPNSAIRk	19112979	N-Term(TMT6plex); K8(TMT6plex)	HCD	1	0	1	1	3651	33890	32070	0.946297	0.981372	-0.0271286
qPNSAIRk	19112979	N-Term(TMT6plex); K8(TMT6plex)	HCD	1	0	1	1	3655	1844	1541	0.835683	0.866658	-0.206465
qPNSAIRk	19112979	N-Term(TMT6plex); K8(TMT6plex)	HCD	1	0	1	1	3657	39300	31960	0.813232	0.843374	-0.245755
qPNSAIRk	19112979	N-Term(TMT6plex); K8(TMT6plex)	HCD	1	0	1	1	3660	5166	2704	0.523422	0.542823	-0.881446
qPNSAIRk	19112979	N-Term(TMT6plex); K8(TMT6plex)	HCD	1	0	1	1	3662	16880	13920	0.824645	0.85521	-0.225649
qPNSAIRk	19112979	N-Term(TMT6plex); K8(TMT6plex)	HCD	1	0	1	1	3664	6093	3674	0.602987	0.625337	-0.677294
qPNSAIRk	19112979	N-Term(TMT6plex); K8(TMT6plex)	HCD	1	0	1	1	3666	5138	4010	0.780459	0.809387	-0.305098
qPNSAIRk	19112979	N-Term(TMT6plex); K8(TMT6plex)	HCD	1	0	1	1	3670	8044	6916	0.859771	0.891639	-0.165469
qPNSAIRk	19112979	N-Term(TMT6plex); K8(TMT6plex)	HCD	1	0	1	1	3672	104600	88830	0.849235	0.880712	-0.183257
qPNSAIRk	19112979	N-Term(TMT6plex); K8(TMT6plex)	HCD	1	0	1	1	3673	114400	109000	0.952797	0.988113	-0.0172522
qPNSAIRk	19112979	N-Term(TMT6plex); K8(TMT6plex)	HCD	1	0	1	1	3677	8923	7824	0.876835	0.909335	-0.137116
qPNSAIRk	19112979	N-Term(TMT6plex); K8(TMT6plex)	HCD	1	0	1	1	3679	229100	225300	0.983413	1.01986	0.0283765
qPNSAIRk	19112979	N-Term(TMT6plex); K8(TMT6plex)	HCD	1	0	1	1	3685	81090	86610	1.06807	1.10766	0.147516
qPNSAIRk	19112979	N-Term(TMT6plex); K8(TMT6plex)	HCD	1	0	1	1	3687	60510	64320	1.06296	1.10236	0.140601
qPNSAIRk	19112979	N-Term(TMT6plex); K8(TMT6plex)	HCD	1	0	1	1	3691	125200	114300	0.912939	0.946778	-0.0789025
qPNSAIRk	19112979	N-Term(TMT6plex); K8(TMT6plex)	HCD	1	0	1	1	3693	37030	38070	1.02809	1.06619	0.0924667
qPNSAIRk	19112979	N-Term(TMT6plex); K8(TMT6plex)	HCD	1	0	1	1	3695	1782000	1716000	0.962963	0.998655	-0.0019411
qPNSAIRk	19112979	N-Term(TMT6plex); K8(TMT6plex)	HCD	1	0	1	1	3697	204900	252200	1.23084	1.27647	0.352155
qPNSAIRk	19112979	N-Term(TMT6plex); K8(TMT6plex)	HCD	1	0	1	1	3699	130800	142200	1.08716	1.12745	0.173066
qPNSAIRk	19112979	N-Term(TMT6plex); K8(TMT6plex)	HCD	1	0	1	1	3701	2528000	2845000	1.1254	1.16711	0.222939
qPNSAIRk	19112979	N-Term(TMT6plex); K8(TMT6plex)	HCD	1	0	1	1	3709	198000	174300	0.880303	0.912932	-0.131421
qPNSAIRk	19112979	N-Term(TMT6plex); K8(TMT6plex)	HCD	1	0	1	1	3711	224300	227700	1.01516	1.05279	0.0742114
qPNSAIRk	19112979	N-Term(TMT6plex); K8(TMT6plex)	HCD	1	0	1	1	3715	290700	272700	0.93808	0.972851	-0.0397097
qPNSAIRk	19112979	N-Term(TMT6plex); K8(TMT6plex)	HCD	1	0	1	1	3717	185500	167700	0.904043	0.937552	-0.0930298
qPNSAIRk	19112979	N-Term(TMT6plex); K8(TMT6plex)	HCD	1	0	1	1	3719	3210000	3099000	0.965421	1.0012	0.00173614
qPNSAIRk	19112979	N-Term(TMT6plex); K8(TMT6plex)	HCD	1	0	1	1	3721	206800	138100	0.667795	0.692547	-0.530016
qPNSAIRk	19112979	N-Term(TMT6plex); K8(TMT6plex)	HCD	1	0	1	1	3723	191300	172200	0.900157	0.933521	-0.099245
qPNSAIRk	19112979	N-Term(TMT6plex); K8(TMT6plex)	HCD	1	0	1	1	3725	3301000	2977000	0.901848	0.935275	-0.0965372
qPNSAIRk	19112979	N-Term(TMT6plex); K8(TMT6plex)	HCD	1	0	1	1	3726	2535000	2501000	0.986588	1.02316	0.033026
qPNSAIRk	19112979	N-Term(TMT6plex); K8(TMT6plex)	HCD	1	0	1	1	3728	243600	262600	1.078	1.11795	0.160859
qPNSAIRk	19112979	N-Term(TMT6plex); K8(TMT6plex)	HCD	1	0	1	1	3731	2482000	2262000	0.911362	0.945142	-0.0813975
qPNSAIRk	19112979	N-Term(TMT6plex); K8(TMT6plex)	HCD	1	0	1	1	3732	1993000	1972000	0.989463	1.02614	0.0372245
qPNSAIRk	19112979	N-Term(TMT6plex); K8(TMT6plex)	HCD	1	0	1	1	3733	184000	163300	0.8875	0.920395	-0.119674
qPNSAIRk	19112979	N-Term(TMT6plex); K8(TMT6plex)	HCD	1	0	1	1	3734	191000	211200	1.10576	1.14674	0.197544
qPNSAIRk	19112979	N-Term(TMT6plex); K8(TMT6plex)	HCD	1	0	1	1	3735	153000	137400	0.898039	0.931325	-0.102643
qPNSAIRk	19112979	N-Term(TMT6plex); K8(TMT6plex)	HCD	1	0	1	1	3737	572000	489100	0.85507	0.886763	-0.173379
qPNSAIRk	19112979	N-Term(TMT6plex); K8(TMT6plex)	HCD	1	0	1	1	3744	945700	732500	0.774559	0.803268	-0.316047
qPNSAIRk	19112979	N-Term(TMT6plex); K8(TMT6plex)	HCD	1	0	1	1	3746	86610	98120	1.13289	1.17489	0.23252
qPNSAIRk	19112979	N-Term(TMT6plex); K8(TMT6plex)	HCD	1	0	1	1	3747	70850	72730	1.02653	1.06458	0.0902894
qPNSAIRk	19112979	N-Term(TMT6plex); K8(TMT6plex)	HCD	1	0	1	1	3751	65150	57270	0.879048	0.911631	-0.133479
qPNSAIRk	19112979	N-Term(TMT6plex); K8(TMT6plex)	HCD	1	0	1	1	3752	47580	44960	0.944935	0.979959	-0.0292066
qPNSAIRk	19112979	N-Term(TMT6plex); K8(TMT6plex)	HCD	1	0	1	1	3755	39630	40030	1.01009	1.04753	0.0669953
qPNSAIRk	19112979	N-Term(TMT6plex); K8(TMT6plex)	HCD	1	0	1	1	3756	35930	36860	1.02588	1.06391	0.0893738
qPNSAIRk	19112979	N-Term(TMT6plex); K8(TMT6plex)	HCD	1	0	1	1	3757	2706	2993	1.10606	1.14706	0.197937
qPNSAIRk	19112979	N-Term(TMT6plex); K8(TMT6plex)	HCD	1	0	1	1	3759	29160	26240	0.899863	0.933216	-0.0997163
qPNSAIRk	19112979	N-Term(TMT6plex); K8(TMT6plex)	HCD	1	0	1	1	3761	19360	15400	0.795455	0.824938	-0.277642
qPNSAIRk	19112979	N-Term(TMT6plex); K8(TMT6plex)	HCD	1	0	1	1	3763	214400	188800	0.880597	0.913237	-0.130939
qPNSAIRk	19112979	N-Term(TMT6plex); K8(TMT6plex)	HCD	1	0	1	1	3764	147100	124800	0.848402	0.879849	-0.184673
qPNSAIRk	19112979	N-Term(TMT6plex); K8(TMT6plex)	HCD	1	0	1	1	3766	14690	14350	0.976855	1.01306	0.018723
qPNSAIRk	19112979	N-Term(TMT6plex); K8(TMT6plex)	HCD	1	0	1	1	3767	10440	10340	0.990421	1.02713	0.0386212
qPNSAIRk	19112979	N-Term(TMT6plex); K8(TMT6plex)	HCD	1	0	1	1	3768	86900	80590	0.927388	0.961762	-0.0562487
qPNSAIRk	19112979	N-Term(TMT6plex); K8(TMT6plex)	HCD	1	0	1	1	3770	13130	13180	1.00381	1.04101	0.0579901
qPNSAIRk	19112979	N-Term(TMT6plex); K8(TMT6plex)	HCD	1	0	1	1	3771	8529	9417	1.10412	1.14504	0.195398
qPNSAIRk	19112979	N-Term(TMT6plex); K8(TMT6plex)	HCD	1	0	1	1	3772	3974	4438	1.11676	1.15815	0.211824
qPNSAIRk	19112979	N-Term(TMT6plex); K8(TMT6plex)	HCD	1	0	1	1	3774	55620	49170	0.884035	0.916801	-0.125319
qPNSAIRk	19112979	N-Term(TMT6plex); K8(TMT6plex)	HCD	1	0	1	1	3775	5382	6999	1.30045	1.34865	0.431513
qPNSAIRk	19112979	N-Term(TMT6plex); K8(TMT6plex)	HCD	1	0	1	1	3777	16340	13850	0.847613	0.87903	-0.186015
qPNSAIRk	19112979	N-Term(TMT6plex); K8(TMT6plex)	HCD	1	0	1	1	3778	45190	47940	1.06085	1.10018	0.137733
qPNSAIRk	19112979	N-Term(TMT6plex); K8(TMT6plex)	HCD	1	0	1	1	3780	4007	4145	1.03444	1.07278	0.101356
qPNSAIRk	19112979	N-Term(TMT6plex); K8(TMT6plex)	HCD	1	0	1	1	3782	7640	7666	1.0034	1.04059	0.057408
qPNSAIRk	19112979	N-Term(TMT6plex); K8(TMT6plex)	HCD	1	0	1	1	3785	3258	3314	1.01719	1.05489	0.0770937
qPNSAIRk	19112979	N-Term(TMT6plex); K8(TMT6plex)	HCD	1	0	1	1	3788	3125	2485	0.7952	0.824674	-0.278104
qPNSAIRk	19112979	N-Term(TMT6plex); K8(TMT6plex)	HCD	1	0	1	1	3791	20250	16880	0.83358	0.864477	-0.2101
qPNSAIRk	19112979	N-Term(TMT6plex); K8(TMT6plex)	HCD	1	0	1	1	3792	5127	4282	0.835186	0.866143	-0.207323
qPNSAIRk	19112979	N-Term(TMT6plex); K8(TMT6plex)	HCD	1	0	1	1	3793	1677	1737	1.03578	1.07417	0.103222
qPNSAIRk	19112979	N-Term(TMT6plex); K8(TMT6plex)	HCD	1	0	1	1	3795	16830	16600	0.986334	1.02289	0.0326547
qPNSAIRk	19112979	N-Term(TMT6plex); K8(TMT6plex)	HCD	1	0	1	1	3800	14100	14310	1.01489	1.05251	0.0738352
qPNSAIRk	19112979	N-Term(TMT6plex); K8(TMT6plex)	HCD	1	0	1	1	3801	3685	3331	0.903935	0.937439	-0.0932026
qPNSAIRk	19112979	N-Term(TMT6plex); K8(TMT6plex)	HCD	1	0	1	1	3802	1750	1307	0.746857	0.77454	-0.368589
qPNSAIRk	19112979	N-Term(TMT6plex); K8(TMT6plex)	HCD	1	0	1	1	3803	878	298.3	0.339749	0.352342	-1.50495
qPNSAIRk	19112979	N-Term(TMT6plex); K8(TMT6plex)	HCD	1	0	1	1	3804	13650	13240	0.969963	1.00592	0.00850885
qPNSAIRk	19112979	N-Term(TMT6plex); K8(TMT6plex)	HCD	1	0	1	1	3807	583.4	636.2	1.0905	1.13092	0.177502
qPNSAIRk	19112979	N-Term(TMT6plex); K8(TMT6plex)	HCD	1	0	1	1	3809	11430	9548	0.835346	0.866308	-0.207048
qPNSAIRk	19112979	N-Term(TMT6plex); K8(TMT6plex)	HCD	1	0	1	1	3810	1586	1249	0.787516	0.816705	-0.292113
qPNSAIRk	19112979	N-Term(TMT6plex); K8(TMT6plex)	HCD	1	0	1	1	3812	8606	7955	0.924355	0.958617	-0.0609742
qPNSAIRk	19112979	N-Term(TMT6plex); K8(TMT6plex)	HCD	1	0	1	1	3818	1457	1476	1.01304	1.05059	0.0711985
qPNSAIRk	19112979	N-Term(TMT6plex); K8(TMT6plex)	HCD	1	0	1	1	3823	512	308	0.601562	0.62386	-0.680707
qPNSAIRk	19112979	N-Term(TMT6plex); K8(TMT6plex)	HCD	1	0	1	1	3824	17670	13520	0.765139	0.793499	-0.3337
qPNSAIRk	19112979	N-Term(TMT6plex); K8(TMT6plex)	HCD	1	0	1	1	3826	19680	17040	0.865854	0.897947	-0.155298
qPNSAIRk	19112979	N-Term(TMT6plex); K8(TMT6plex)	HCD	1	0	1	1	3827	2202	1677	0.76158	0.789809	-0.340425
qPnSAIRk	19112979	N-Term(TMT6plex); N3(Deamidated); K8(TMT6plex)	HCD	1	0	1	1	3830	5452	3388	0.621423	0.644457	-0.633845
qPnSAIRk	19112979	N-Term(TMT6plex); N3(Deamidated); K8(TMT6plex)	HCD	1	0	1	1	3831	2935	1854	0.631687	0.6551	-0.610213
qPnSAIRk	19112979	N-Term(TMT6plex); N3(Deamidated); K8(TMT6plex)	HCD	1	0	1	1	3833	32170	24680	0.767174	0.79561	-0.329867
qPnSAIRk	19112979	N-Term(TMT6plex); N3(Deamidated); K8(TMT6plex)	HCD	1	0	1	1	3834	4887	3750	0.767342	0.795784	-0.329552
qPnSAIRk	19112979	N-Term(TMT6plex); N3(Deamidated); K8(TMT6plex)	HCD	1	0	1	1	3835	4352	3294	0.756893	0.784948	-0.349331
qPnSAIRk	19112979	N-Term(TMT6plex); N3(Deamidated); K8(TMT6plex)	HCD	1	0	1	1	3836	43840	32470	0.740648	0.7681	-0.380634
qPnSAIRk	19112979	N-Term(TMT6plex); N3(Deamidated); K8(TMT6plex)	HCD	1	0	1	1	3837	53720	42280	0.787044	0.816216	-0.292977
qPnSAIRk	19112979	N-Term(TMT6plex); N3(Deamidated); K8(TMT6plex)	HCD	1	0	1	1	3838	29320	29180	0.995225	1.03211	0.0456015
qPnSAIRk	19112979	N-Term(TMT6plex); N3(Deamidated); K8(TMT6plex)	HCD	1	0	1	1	3839	5617	5304	0.944276	0.979276	-0.0302123
qPnSAIRk	19112979	N-Term(TMT6plex); N3(Deamidated); K8(TMT6plex)	HCD	1	0	1	1	3840	5563	4214	0.757505	0.785582	-0.348166
qPnSAIRk	19112979	N-Term(TMT6plex); N3(Deamidated); K8(TMT6plex)	HCD	1	0	1	1	3841	13210	10320	0.781226	0.810183	-0.303681
qPnSAIRk	19112979	N-Term(TMT6plex); N3(Deamidated); K8(TMT6plex)	HCD	1	0	1	1	3842	72350	53570	0.740428	0.767873	-0.381061
qPnSAIRk	19112979	N-Term(TMT6plex); N3(Deamidated); K8(TMT6plex)	HCD	1	0	1	1	3843	24470	17240	0.704536	0.73065	-0.452748
qPnSAIRk	19112979	N-Term(TMT6plex); N3(Deamidated); K8(TMT6plex)	HCD	1	0	1	1	3844	9038	7819	0.865125	0.897191	-0.156513
qPnSAIRk	19112979	N-Term(TMT6plex); N3(Deamidated); K8(TMT6plex)	HCD	1	0	1	1	3846	42070	34750	0.826004	0.85662	-0.223272
qPnSAIRk	19112979	N-Term(TMT6plex); N3(Deamidated); K8(TMT6plex)	HCD	1	0	1	1	3848	9503	9000	0.947069	0.982173	-0.0259513
qPnSAIRk	19112979	N-Term(TMT6plex); N3(Deamidated); K8(TMT6plex)	HCD	1	0	1	1	3849	14070	11280	0.801706	0.831421	-0.266349
qPnSAIRk	19112979	N-Term(TMT6plex); N3(Deamidated); K8(TMT6plex)	HCD	1	0	1	1	3851	2795	2215	0.792487	0.82186	-0.283035
qPnSAIRk	19112979	N-Term(TMT6plex); N3(Deamidated); K8(TMT6plex)	HCD	0.3529	0	1	1	3853	90390	73920	0.81779	0.848101	-0.237692
qPnSAIRk	19112979	N-Term(TMT6plex); N3(Deamidated); K8(TMT6plex)	HCD	1	0	1	1	3854	13880	10180	0.733429	0.760614	-0.394763
qPnSAIRk	19112979	N-Term(TMT6plex); N3(Deamidated); K8(TMT6plex)	HCD	1	0	1	1	3856	9352	8238	0.880881	0.913531	-0.130474
qPnSAIRk	19112979	N-Term(TMT6plex); N3(Deamidated); K8(TMT6plex)	HCD	1	0	1	1	3858	124300	89080	0.716653	0.743216	-0.428146
qPnSAIRk	19112979	N-Term(TMT6plex); N3(Deamidated); K8(TMT6plex)	HCD	1	0	1	1	3860	10710	9146	0.853968	0.885621	-0.175239
qPnSAIRk	19112979	N-Term(TMT6plex); N3(Deamidated); K8(TMT6plex)	HCD	1	0	1	1	3862	127500	94680	0.742588	0.770112	-0.376859
qPnSAIRk	19112979	N-Term(TMT6plex); N3(Deamidated); K8(TMT6plex)	HCD	1	0	1	1	3863	102200	82870	0.810861	0.840916	-0.249967
qPnSAIRk	19112979	N-Term(TMT6plex); N3(Deamidated); K8(TMT6plex)	HCD	1	0	1	1	3865	10600	11330	1.06887	1.10849	0.14859
qPnSAIRk	19112979	N-Term(TMT6plex); N3(Deamidated); K8(TMT6plex)	HCD	1	0	1	1	3867	3402	2765	0.812757	0.842882	-0.246597
qPnSAIRk	19112979	N-Term(TMT6plex); N3(Deamidated); K8(TMT6plex)	HCD	1	0	1	1	3869	92330	88490	0.95841	0.993934	-0.00877838
qPnSAIRk	19112979	N-Term(TMT6plex); N3(Deamidated); K8(TMT6plex)	HCD	1	0	1	1	3871	15260	12170	0.79751	0.82707	-0.273919
qPnSAIRk	19112979	N-Term(TMT6plex); N3(Deamidated); K8(TMT6plex)	HCD	1	0	1	1	3873	11650	8844	0.759142	0.787279	-0.345052
qPnSAIRk	19112979	N-Term(TMT6plex); N3(Deamidated); K8(TMT6plex)	HCD	1	0	1	1	3875	8620	7653	0.887819	0.920726	-0.119156
qPnSAIRk	19112979	N-Term(TMT6plex); N3(Deamidated); K8(TMT6plex)	HCD	1	0	1	1	3877	77800	60090	0.772365	0.800993	-0.320139
qPnSAIRk	19112979	N-Term(TMT6plex); N3(Deamidated); K8(TMT6plex)	HCD	1	0	1	1	3879	8966	6814	0.759982	0.788151	-0.343456
qPnSAIRk	19112979	N-Term(TMT6plex); N3(Deamidated); K8(TMT6plex)	HCD	1	0	1	1	3881	20350	18120	0.890418	0.923421	-0.114939
qPnSAIRk	19112979	N-Term(TMT6plex); N3(Deamidated); K8(TMT6plex)	HCD	1	0	1	1	3883	19170	12910	0.673448	0.69841	-0.517855
qPnSAIRk	19112979	N-Term(TMT6plex); N3(Deamidated); K8(TMT6plex)	HCD	1	0	1	1	3885	6311	5584	0.884804	0.9176	-0.124063
qPnSAIRk	19112979	N-Term(TMT6plex); N3(Deamidated); K8(TMT6plex)	HCD	1	0	1	1	3889	39830	34860	0.87522	0.90766	-0.139776
qPnSAIRk	19112979	N-Term(TMT6plex); N3(Deamidated); K8(TMT6plex)	HCD	1	0	1	1	3891	4675	3621	0.774545	0.803254	-0.316072
qPnSAIRk	19112979	N-Term(TMT6plex); N3(Deamidated); K8(TMT6plex)	HCD	1	0	1	1	3893	37160	28670	0.771529	0.800125	-0.321702
qPnSAIRk	19112979	N-Term(TMT6plex); N3(Deamidated); K8(TMT6plex)	HCD	1	0	1	1	3895	3419	2051	0.599883	0.622118	-0.68474
qPnSAIRk	19112979	N-Term(TMT6plex); N3(Deamidated); K8(TMT6plex)	HCD	1	0	1	1	3896	281.1	115.2	0.409819	0.425009	-1.23444
qPnSAIRk	19112979	N-Term(TMT6plex); N3(Deamidated); K8(TMT6plex)	HCD	1	0	1	1	3897	24640	16350	0.663555	0.68815	-0.539205
qPnSAIRk	19112979	N-Term(TMT6plex); N3(Deamidated); K8(TMT6plex)	HCD	1	0	1	1	3898	3265	2266	0.694028	0.719752	-0.474428
qPnSAIRk	19112979	N-Term(TMT6plex); N3(Deamidated); K8(TMT6plex)	HCD	1	0	1	1	3899	1899	1475	0.776725	0.805514	-0.312018
qPnSAIRk	19112979	N-Term(TMT6plex); N3(Deamidated); K8(TMT6plex)	HCD	1	0	1	1	3900	18520	12450	0.672246	0.697163	-0.520432
qPnSAIRk	19112979	N-Term(TMT6plex); N3(Deamidated); K8(TMT6plex)	HCD	1	0	1	1	3901	9026	6039	0.669067	0.693866	-0.52727
qPnSAIRk	19112979	N-Term(TMT6plex); N3(Deamidated); K8(TMT6plex)	HCD	1	0	1	1	3902	1918	953.4	0.49708	0.515505	-0.955943
qPnSAIRk	19112979	N-Term(TMT6plex); N3(Deamidated); K8(TMT6plex)	HCD	1	0	1	1	3903	735.8	794.1	1.07923	1.11924	0.162514
qPnSAIRk	19112979	N-Term(TMT6plex); N3(Deamidated); K8(TMT6plex)	HCD	1	0	1	1	3904	23210	14740	0.635071	0.65861	-0.602503
qPnSAIRk	19112979	N-Term(TMT6plex); N3(Deamidated); K8(TMT6plex)	HCD	1	0	1	1	3905	2838	1097	0.38654	0.400867	-1.3188
qPnSAIRk	19112979	N-Term(TMT6plex); N3(Deamidated); K8(TMT6plex)	HCD	1	0	1	1	3913	10530	6141	0.583191	0.604807	-0.725453
qPnSAIRk	19112979	N-Term(TMT6plex); N3(Deamidated); K8(TMT6plex)	HCD	1	0	1	1	3917	19020	11780	0.619348	0.642304	-0.638671
qPnSAIRk	19112979	N-Term(TMT6plex); N3(Deamidated); K8(TMT6plex)	HCD	1	0	1	1	3918	9463	5095	0.538413	0.558369	-0.840709
qPnSAIRk	19112979	N-Term(TMT6plex); N3(Deamidated); K8(TMT6plex)	HCD	1	0	1	1	3921	16440	10240	0.622871	0.645958	-0.630488
qPnSAIRk	19112979	N-Term(TMT6plex); N3(Deamidated); K8(TMT6plex)	HCD	1	0	1	1	3922	22630	14300	0.631905	0.655326	-0.609715
qPnSAIRk	19112979	N-Term(TMT6plex); N3(Deamidated); K8(TMT6plex)	HCD	1	0	1	1	3924	3236	2211	0.683251	0.708576	-0.497006
qPnSAIRk	19112979	N-Term(TMT6plex); N3(Deamidated); K8(TMT6plex)	HCD	1	0	1	1	3925	1132	947.7	0.837191	0.868222	-0.203865
qPnSAIRk	19112979	N-Term(TMT6plex); N3(Deamidated); K8(TMT6plex)	HCD	1	0	1	1	3927	30450	21230	0.697209	0.723051	-0.467831
qPnSAIRk	19112979	N-Term(TMT6plex); N3(Deamidated); K8(TMT6plex)	HCD	0.1667	0	1	1	3928	8357	5611	0.671413	0.696299	-0.522221
qPnSAIRk	19112979	N-Term(TMT6plex); N3(Deamidated); K8(TMT6plex)	HCD	1	0	1	1	3929	3510	2989	0.851567	0.883131	-0.179301
qPnSAIRk	19112979	N-Term(TMT6plex); N3(Deamidated); K8(TMT6plex)	HCD	1	0	1	1	3930	2106	1697	0.805793	0.83566	-0.259012
qPnSAIRk	19112979	N-Term(TMT6plex); N3(Deamidated); K8(TMT6plex)	HCD	1	0	1	1	3932	27850	23820	0.855296	0.886998	-0.172997
qPnSAIRk	19112979	N-Term(TMT6plex); N3(Deamidated); K8(TMT6plex)	HCD	1	0	1	1	3933	3325	2113	0.635489	0.659043	-0.601555
qPnSAIRk	19112979	N-Term(TMT6plex); N3(Deamidated); K8(TMT6plex)	HCD	1	0	1	1	3935	2948	2597	0.880936	0.913588	-0.130384
qPnSAIRk	19112979	N-Term(TMT6plex); N3(Deamidated); K8(TMT6plex)	HCD	1	0	1	1	3936	7791	5976	0.767039	0.795469	-0.330122
qPnSAIRk	19112979	N-Term(TMT6plex); N3(Deamidated); K8(TMT6plex)	HCD	1	0	1	1	3937	37930	28260	0.745057	0.772672	-0.372071
qPnSAIRk	19112979	N-Term(TMT6plex); N3(Deamidated); K8(TMT6plex)	HCD	1	0	1	1	3938	31880	24150	0.757528	0.785606	-0.348122
qPnSAIRk	19112979	N-Term(TMT6plex); N3(Deamidated); K8(TMT6plex)	HCD	1	0	1	1	3939	32520	25880	0.795818	0.825315	-0.276983
qPnSAIRk	19112979	N-Term(TMT6plex); N3(Deamidated); K8(TMT6plex)	HCD	1	0	1	1	3940	34340	27090	0.788876	0.818116	-0.289623
qPnSAIRk	19112979	N-Term(TMT6plex); N3(Deamidated); K8(TMT6plex)	HCD	1	0	1	1	3941	32200	25800	0.801242	0.83094	-0.267183
qPnSAIRk	19112979	N-Term(TMT6plex); N3(Deamidated); K8(TMT6plex)	HCD	1	0	1	1	3943	35760	28150	0.787192	0.81637	-0.292705
qPnSAIRk	19112979	N-Term(TMT6plex); N3(Deamidated); K8(TMT6plex)	HCD	1	0	1	1	3944	39940	29020	0.72659	0.753521	-0.40828
qPnSAIRk	19112979	N-Term(TMT6plex); N3(Deamidated); K8(TMT6plex)	HCD	1	0	1	1	3946	4704	3957	0.841199	0.872378	-0.196974
qPnSAIRk	19112979	N-Term(TMT6plex); N3(Deamidated); K8(TMT6plex)	HCD	1	0	1	1	3949	37070	31770	0.857027	0.888793	-0.17008
qPnSAIRk	19112979	N-Term(TMT6plex); N3(Deamidated); K8(TMT6plex)	HCD	1	0	1	1	3950	12670	11710	0.92423	0.958487	-0.0611688
qPnSAIRk	19112979	N-Term(TMT6plex); N3(Deamidated); K8(TMT6plex)	HCD	1	0	1	1	3952	5108	3598	0.704385	0.730494	-0.453057
qPnSAIRk	19112979	N-Term(TMT6plex); N3(Deamidated); K8(TMT6plex)	HCD	1	0	1	1	3954	24640	20740	0.841721	0.872919	-0.19608
qPnSAIRk	19112979	N-Term(TMT6plex); N3(Deamidated); K8(TMT6plex)	HCD	1	0	1	1	3956	4464	3607	0.80802	0.837969	-0.255031
qPnSAIRk	19112979	N-Term(TMT6plex); N3(Deamidated); K8(TMT6plex)	HCD	1	0	1	1	3957	3262	2928	0.897609	0.930879	-0.103335
qPnSAIRk	19112979	N-Term(TMT6plex); N3(Deamidated); K8(TMT6plex)	HCD	1	0	1	1	3958	122.8	196.6	1.60098	1.66032	0.731459
qPnSAIRk	19112979	N-Term(TMT6plex); N3(Deamidated); K8(TMT6plex)	HCD	1	0	1	1	3959	29560	27680	0.936401	0.971108	-0.0422956
qPnSAIRk	19112979	N-Term(TMT6plex); N3(Deamidated); K8(TMT6plex)	HCD	1	0	1	1	3961	4758	3581	0.752627	0.780523	-0.357486
qPnSAIRk	19112979	N-Term(TMT6plex); N3(Deamidated); K8(TMT6plex)	HCD	1	0	1	1	3962	3878	3161	0.815111	0.845323	-0.242425
qPnSAIRk	19112979	N-Term(TMT6plex); N3(Deamidated); K8(TMT6plex)	HCD	1	0	1	1	3964	29270	26430	0.902972	0.936441	-0.0947396
qPnSAIRk	19112979	N-Term(TMT6plex); N3(Deamidated); K8(TMT6plex)	HCD	1	0	1	1	3966	2908	2502	0.860385	0.892276	-0.164439
qPnSAIRk	19112979	N-Term(TMT6plex); N3(Deamidated); K8(TMT6plex)	HCD	1	0	1	1	3967	12830	11980	0.933749	0.968359	-0.0463866
qPnSAIRk	19112979	N-Term(TMT6plex); N3(Deamidated); K8(TMT6plex)	HCD	1	0	1	1	3968	28610	24470	0.855295	0.886997	-0.172999
qPnSAIRk	19112979	N-Term(TMT6plex); N3(Deamidated); K8(TMT6plex)	HCD	1	0	1	1	3970	2917	2581	0.884813	0.917609	-0.124049
qPnSAIRk	19112979	N-Term(TMT6plex); N3(Deamidated); K8(TMT6plex)	HCD	1	0	1	1	3972	4446	3795	0.853576	0.885214	-0.175901
qPnSAIRk	19112979	N-Term(TMT6plex); N3(Deamidated); K8(TMT6plex)	HCD	1	0	1	1	3973	10320	7980	0.773256	0.801917	-0.318476
qPnSAIRk	19112979	N-Term(TMT6plex); N3(Deamidated); K8(TMT6plex)	HCD	1	0	1	1	3978	4996	4305	0.861689	0.893628	-0.162254
qPnSAIRk	19112979	N-Term(TMT6plex); N3(Deamidated); K8(TMT6plex)	HCD	1	0	1	1	3981	6825	5710	0.83663	0.86764	-0.204832
qPNSAIRk	19112979	N-Term(TMT6plex); K8(TMT6plex)	HCD	1	0	1	1	153181	92753.5	87065.8	0.938679	0.973472	-0.0387892
qPNSAIRk	19112979	N-Term(TMT6plex); K8(TMT6plex)	HCD	1	0	1	1	153226	76620	72999.2	0.952743	0.988056	-0.017335
qPNSAIRk	19112979	N-Term(TMT6plex); K8(TMT6plex)	HCD	1	0	1	1	153271	18990.4	17352.9	0.913774	0.947643	-0.0775847
qPnSAIRk	19112979	N-Term(TMT6plex); N3(Deamidated); K8(TMT6plex)	HCD	1	0	1	1	153438	14501.5	13569.5	0.935734	0.970417	-0.0433231
qPnSAIRk	19112979	N-Term(TMT6plex); N3(Deamidated); K8(TMT6plex)	HCD	1	0	1	1	153496	32507.3	28953.8	0.890688	0.923702	-0.114501
qPNSAIRk	19112979	N-Term(TMT6plex); K8(TMT6plex)	HCD	1	0	1	1	173873	10018	8049.01	0.803458	0.833238	-0.2632
qPNSAIRk	19112979	N-Term(TMT6plex); K8(TMT6plex)	HCD	1	0	1	1	173916	84632.9	93382.4	1.10338	1.14428	0.194439
qPNSAIRk	19112979	N-Term(TMT6plex); K8(TMT6plex)	HCD	1	0	1	1	173961	445023	502946	1.13016	1.17205	0.229029
qPNSAIRk	19112979	N-Term(TMT6plex); K8(TMT6plex)	HCD	1	0	1	1	174006	307158	393393	1.28075	1.32822	0.409498
qPNSAIRk	19112979	N-Term(TMT6plex); K8(TMT6plex)	HCD	1	0	1	1	174051	95906.6	77050.3	0.803389	0.833167	-0.263322
qPNSAIRk	19112979	N-Term(TMT6plex); K8(TMT6plex)	HCD	1	0	1	1	174096	15359.2	16536.7	1.07666	1.11657	0.159075
qPnSAIRk	19112979	N-Term(TMT6plex); N3(Deamidated); K8(TMT6plex)	HCD	1	0	1	1	174233	9930.07	11055.8	1.11337	1.15464	0.207439
qPnSAIRk	19112979	N-Term(TMT6plex); N3(Deamidated); K8(TMT6plex)	HCD	1	0	1	1	174276	69400.5	54011.6	0.778259	0.807105	-0.309171
qPnSAIRk	19112979	N-Term(TMT6plex); N3(Deamidated); K8(TMT6plex)	HCD	1	0	1	1	174321	78653.5	72599.6	0.923031	0.957243	-0.0630423
qPnSAIRk	19112979	N-Term(TMT6plex); N3(Deamidated); K8(TMT6plex)	HCD	1	0	1	1	174366	34627.3	26348.9	0.760927	0.789131	-0.341664
qPnSAIRk	19112979	N-Term(TMT6plex); N3(Deamidated); K8(TMT6plex)	HCD	1	0	1	1	174531	16879.4	17477.2	1.03542	1.07379	0.102717
qPnSAIRk	19112979	N-Term(TMT6plex); N3(Deamidated); K8(TMT6plex)	HCD	1	0	1	1	174583	14651.6	12973.5	0.885464	0.918284	-0.122988
qPNSAIRk	19112979	N-Term(TMT6plex); K8(TMT6plex)	HCD	1	0	1	1	189277	38201.7	32764.4	0.857669	0.889459	-0.169001
qPNSAIRk	19112979	N-Term(TMT6plex); K8(TMT6plex)	HCD	1	0	1	1	189323	23703.6	15977.6	0.674058	0.699043	-0.516548
qPNSAIRk	19112979	N-Term(TMT6plex); K8(TMT6plex)	HCD	1	0	1	1	189335	1.57647e+06	1.69206e+06	1.07332	1.1131	0.154586
qPNSAIRk	19112979	N-Term(TMT6plex); K8(TMT6plex)	HCD	1	0	1	1	189380	103923	108038	1.0396	1.07814	0.108538
qPNSAIRk	19112979	N-Term(TMT6plex); K8(TMT6plex)	HCD	1	0	1	1	189395	2.33557e+06	1.63629e+06	0.700595	0.726563	-0.46084
qPnSAIRk	19112979	N-Term(TMT6plex); N3(Deamidated); K8(TMT6plex)	HCD	1	0	1	1	189427	835228	796970	0.954194	0.989561	-0.0151394
qPnSAIRk	19112979	N-Term(TMT6plex); N3(Deamidated); K8(TMT6plex)	HCD	1	0	1	1	189446	113514	113478	0.999684	1.03674	0.0520502
qPnSAIRk	19112979	N-Term(TMT6plex); N3(Deamidated); K8(TMT6plex)	HCD	1	0	1	1	189485	11030219	7.74067e+06	0.70177	0.727781	-0.458424
qPnSAIRk	19112979	N-Term(TMT6plex); N3(Deamidated); K8(TMT6plex)	HCD	1	0	1	1	189516	580698	491267	0.845994	0.877351	-0.188774
qPnSAIRk	19112979	N-Term(TMT6plex); N3(Deamidated); K8(TMT6plex)	HCD	1	0	1	1	189542	8.1461e+06	6973309	0.856031	0.88776	-0.171759
qPnSAIRk	19112979	N-Term(TMT6plex); N3(Deamidated); K8(TMT6plex)	HCD	1	0	1	1	189590	356140	289067	0.811667	0.841751	-0.248534
qPnSAIRk	19112979	N-Term(TMT6plex); N3(Deamidated); K8(TMT6plex)	HCD	1	0	1	1	189600	1.71525e+06	1590184	0.927086	0.961449	-0.0567175
qPnSAIRk	19112979	N-Term(TMT6plex); N3(Deamidated); K8(TMT6plex)	HCD	1	0	1	1	189654	267958	254917	0.95133	0.986591	-0.0194753
qPnSAIRk	19112979	N-Term(TMT6plex); N3(Deamidated); K8(TMT6plex)	HCD	1	0	1	1	189664	753094	628320	0.834318	0.865242	-0.208824
qPnSAIRk	19112979	N-Term(TMT6plex); N3(Deamidated); K8(TMT6plex)	HCD	1	0	1	1	189711	159688	154215	0.965726	1.00152	0.00219256
qPnSAIRk	19112979	N-Term(TMT6plex); N3(Deamidated); K8(TMT6plex)	HCD	1	0	1	1	189722	524160	323723	0.617603	0.640495	-0.642741
qPnSAIRk	19112979	N-Term(TMT6plex); N3(Deamidated); K8(TMT6plex)	HCD	1	0	1	1	189782	210399	140523	0.667885	0.692641	-0.529821
qPnSAIRk	19112979	N-Term(TMT6plex); N3(Deamidated); K8(TMT6plex)	HCD	1	0	1	1	189872	86829.6	106705	1.2289	1.27445	0.349879
qPNSAIRk	19112979	N-Term(TMT6plex); K8(TMT6plex)	HCD	1	0	1	1	207669	9461.56	8942.93	0.945186	0.980219	-0.0288235
qPNSAIRk	19112979	N-Term(TMT6plex); K8(TMT6plex)	HCD	1	0	1	1	207717	34484.1	30663.7	0.889214	0.922173	-0.116891
qPNSAIRk	19112979	N-Term(TMT6plex); K8(TMT6plex)	HCD	1	0	1	1	207802	720791	609009	0.844918	0.876235	-0.190611
qPNSAIRk	19112979	N-Term(TMT6plex); K8(TMT6plex)	HCD	1	0	1	1	207833	21849.9	24503.1	1.12143	1.16299	0.217842
qPNSAIRk	19112979	N-Term(TMT6plex); K8(TMT6plex)	HCD	1	0	1	1	207846	3.26096e+06	2939860	0.901533	0.934949	-0.0970412
qPNSAIRk	19112979	N-Term(TMT6plex); K8(TMT6plex)	HCD	1	0	1	1	207882	32766.2	45621.1	1.39232	1.44393	0.529998
qPNSAIRk	19112979	N-Term(TMT6plex); K8(TMT6plex)	HCD	1	0	1	1	207897	2.74838e+06	2.54739e+06	0.926871	0.961226	-0.0570527
qPNSAIRk	19112979	N-Term(TMT6plex); K8(TMT6plex)	HCD	1	0	1	1	207929	12114.8	13853.2	1.1435	1.18588	0.245957
qPNSAIRk	19112979	N-Term(TMT6plex); K8(TMT6plex)	HCD	1	0	1	1	208078	16120.2	15708.2	0.97444	1.01056	0.0151516
qPnSAIRk	19112979	N-Term(TMT6plex); N3(Deamidated); K8(TMT6plex)	HCD	1	0	1	1	208167	43046.4	32862.6	0.763423	0.791719	-0.33694
qPnSAIRk	19112979	N-Term(TMT6plex); N3(Deamidated); K8(TMT6plex)	HCD	1	0	1	1	208212	123056	95090.2	0.772736	0.801378	-0.319445
qPnSAIRk	19112979	N-Term(TMT6plex); N3(Deamidated); K8(TMT6plex)	HCD	1	0	1	1	208213	123077	95874.4	0.778977	0.80785	-0.307841
qPnSAIRk	19112979	N-Term(TMT6plex); N3(Deamidated); K8(TMT6plex)	HCD	1	0	1	1	208220	1880.95	1566.66	0.832906	0.863778	-0.211267
qPnSAIRk	19112979	N-Term(TMT6plex); N3(Deamidated); K8(TMT6plex)	HCD	1	0	1	1	208255	109057	93032.6	0.853066	0.884685	-0.176764
qPnSAIRk	19112979	N-Term(TMT6plex); N3(Deamidated); K8(TMT6plex)	HCD	1	0	1	1	208356	22492.8	13330.8	0.59267	0.614638	-0.702192
qPnSAIRk	19112979	N-Term(TMT6plex); N3(Deamidated); K8(TMT6plex)	HCD	1	0	1	1	208402	28445.6	26857.6	0.944173	0.979169	-0.0303702
qPnSAIRk	19112979	N-Term(TMT6plex); N3(Deamidated); K8(TMT6plex)	HCD	1	0	1	1	208462	31816.5	27273.4	0.857207	0.88898	-0.169777
											average	0.896677
