# Supplementary material for: Prolyl dihydroxylation of unassembled uS12/Rps23 regulates fungal hypoxic adaptation
Source: eLife journal article supplement (doi:10.7554/elife.28563), 2017-10-30

Figure 1 - Figure Supplement 1

A. Yeast two-hybrid

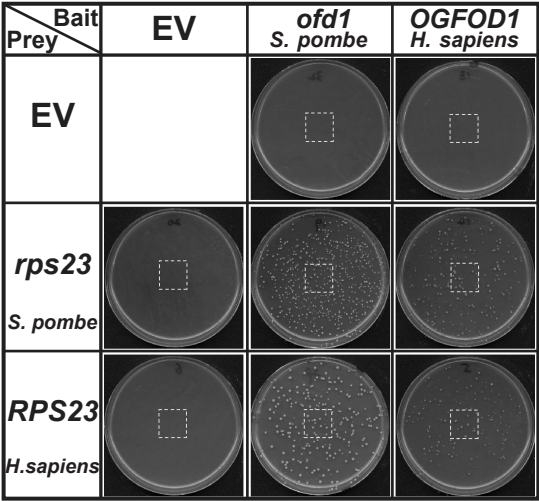

B. Immunoblot

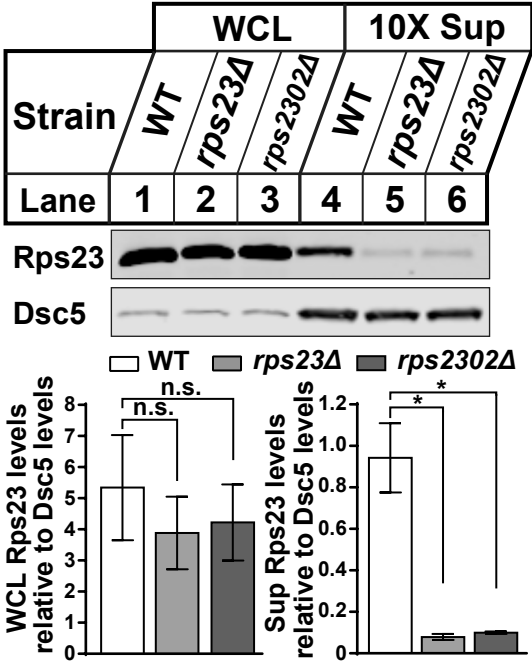

C. MS/MS spectra from *in vitro* hydroxylation

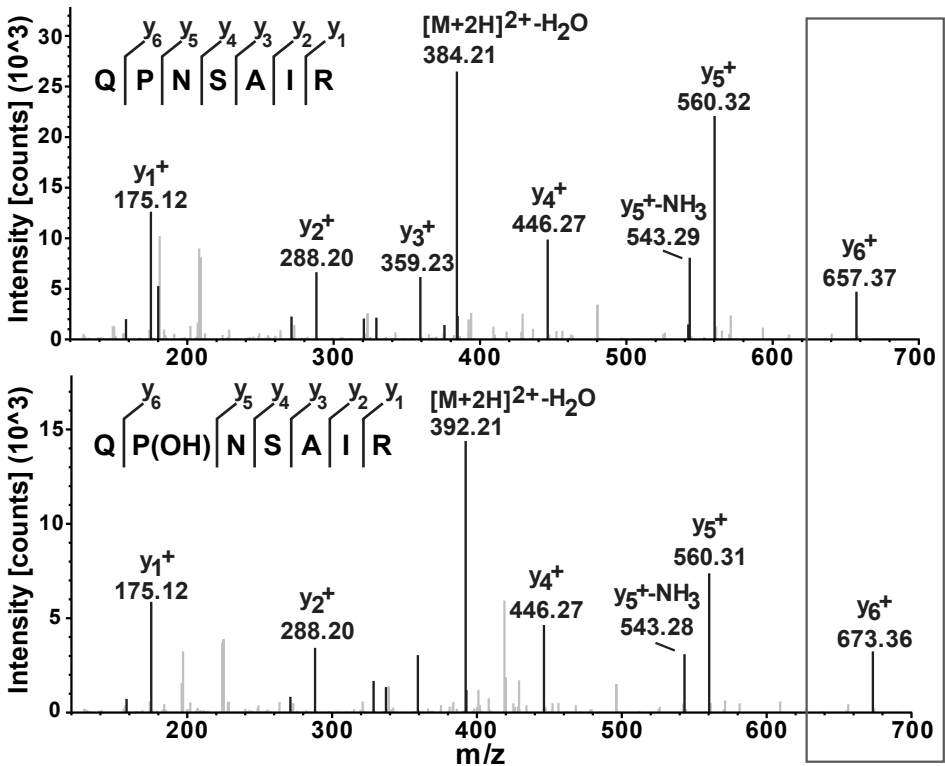

Supplement: supp [file elife-28563-supp-v1.zip]
