# Supplementary material for: Prolyl dihydroxylation of unassembled uS12/Rps23 regulates fungal hypoxic adaptation
Source: eLife journal article supplement (doi:10.7554/elife.28563), 2017-10-30

# Figure 1 - Figure Supplement 2

## Ofd1 IP

| Strain | Input     |   |              |   |                                             |   | 20X Bound |   |              |    |                                             |    |           |
|--------|-----------|---|--------------|---|---------------------------------------------|---|-----------|---|--------------|----|---------------------------------------------|----|-----------|
|        | <i>WT</i> |   | <i>ofd1Δ</i> |   | <i>ofd1</i><br><i>H142A</i><br><i>D144A</i> |   | <i>WT</i> |   | <i>ofd1Δ</i> |    | <i>ofd1</i><br><i>H142A</i><br><i>D144A</i> |    | no lysate |
| DSP    | -         | + | -            | + | -                                           | + | -         | + | -            | +  | -                                           | +  |           |
| Lane   | 1         | 2 | 3            | 4 | 5                                           | 6 | 7         | 8 | 9            | 10 | 11                                          | 12 | 13        |

Ofd1

Rps23

Rps5

actin

\*

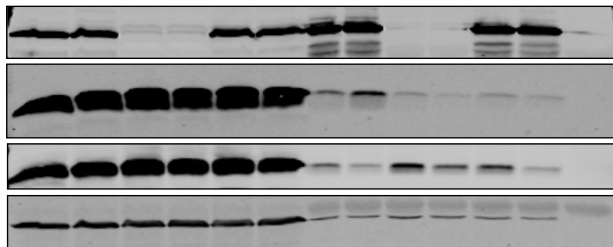

Supplement: supp [file elife-28563-supp-v1.zip]
