# Supplementary material for: Prolyl dihydroxylation of unassembled uS12/Rps23 regulates fungal hypoxic adaptation
Source: eLife journal article supplement (doi:10.7554/elife.28563), 2017-10-30
Supplement: supp [file elife-28563-supp-v1.zip]

## Figure 6 - Figure Supplement 1

### A. RT-qPCR

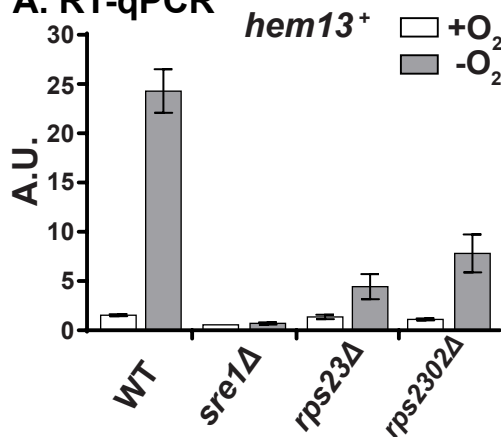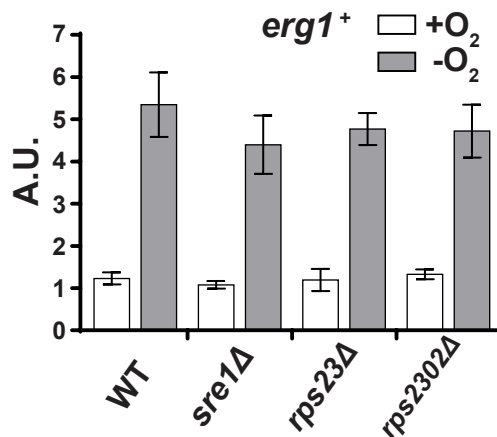

### B. Growth assay (Bioneer Strains)

| Strain \ CoCl <sub>2</sub> | - | + |
|----------------------------|---|---|
|                            |   |   |
| WT                         |   |   |
| <i>sre1Δ</i>               |   |   |
| <i>rps23Δ</i>              |   |   |
| <i>rpl23Δ</i>              |   |   |
| <i>rps25Δ</i>              |   |   |
