# Supplementary material for: Prolyl dihydroxylation of unassembled uS12/Rps23 regulates fungal hypoxic adaptation
Source: eLife journal article supplement (doi:10.7554/elife.28563), 2017-10-30

Figure 7 - Figure Supplement 1

A. Random spore analysis

| Strains | <i>rps23Δ::nat<sup>r</sup></i><br>X        |                                                |
|---------|--------------------------------------------|------------------------------------------------|
|         | <i>rps2302<sup>+</sup>-kan<sup>r</sup></i> | <i>GST-rps2302<sup>+</sup>-kan<sup>r</sup></i> |
| Spot    | 1                                          | 2                                              |

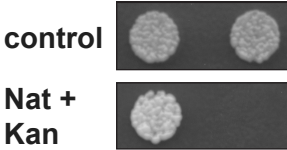

B. Immunoblot: *nro1Δ sre1N* cells

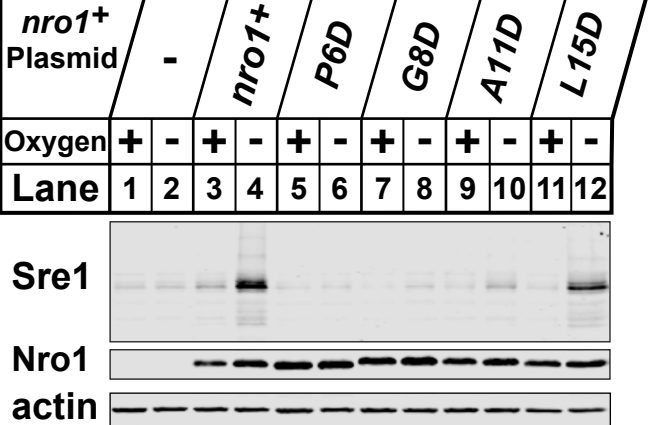

C. Immunoblot: *rps2302Δ sre1N* cells

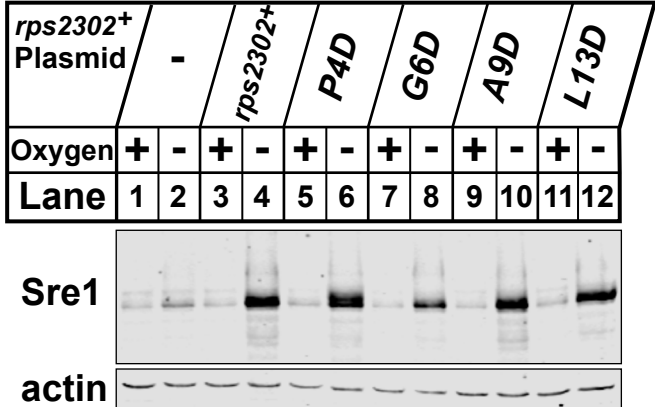

D. Immunoblot: *rps2302Δ sre1N* cells

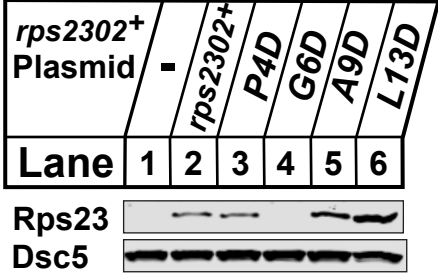

Supplement: supp [file elife-28563-supp-v1.zip]
