# Supplementary material for: Prolyl dihydroxylation of unassembled uS12/Rps23 regulates fungal hypoxic adaptation
Source: eLife journal article supplement (doi:10.7554/elife.28563), 2017-10-30
Supplement: supp [file elife_poa_e28563_Key_Resources_Table.xlsx]

## Sheet: Template
Reagent type. Duplicate rows as needed. Order is flexible, but row titles must be preserved. Species (mandatory if applicable). Append in parentheses. First mention, use full genus. Sex (if applicable). Add within parentheses after species.	Designation. Symbol/name used in publication. Separate multiple entries with semi-colon, space. (If semi-colon within designation, delimit wtith double quotes.)	Source (public). Stock center, company, data repository. Reference. Include PMID or DOI; use “this paper” if new. If neither applies enter “other” and explain in Additional Information.	Identifiers. Format as ID_source:identifier. Separate multiple entries with semi-colon, space. Include catalog numbers, stock numbers, database IDs or accession numbers, RRIDs.	Additional information. Mandatory if column C entry is “this paper” or “other”. Description of new reagent; laboratory from which reagent obtained; other pertinent information. For antibodies, indicate dilution and conditions used.
Key Resources Table
Reagent type (species) or resource	Designation	Source or reference	Identifiers	Additional information
strain, strain background (S. pombe)	WT	ATCC		KGY425: h- his3-D1 leu1-32 ura4-D18 ade6-M210
strain, strain background (S. pombe)	ofd1Δ	this study		PEY1801: h- his3-D1 leu1-32 ura4-D18 ade6-M210 ofd1Δ::natMX6
strain, strain background (S. pombe)	ofd1 H142A D144A	PMID: 18418381		PEY1152: h- his3-D1 leu1-32 ura4-D18 ade6-M210 ofd1 H142A D144A
strain, strain background (S. pombe)	nro1Δ	this study		PEY1802: h- his3-D1 leu1-32 ura4-D18 ade6-M210 nro1Δ::natMX6
strain, strain background (S. pombe)	rps2302Δ	this study		PEY1803: h+ his3-D1 leu1-32 ura4-D18 ade6-M210 rps2302Δ::natMX6
strain, strain background (S. pombe)	rps23Δ; rps23Δ-natr	this study		PEY1804: h- his3-D1 leu1-32 ura4-D18 ade6-M210 rps23Δ::natMX6
strain, strain background (S. pombe)	rps2302-GFP	this study		PEY1805: h- his3-D1 leu1-32 ura4-D18 ade6-M210 rps2302+-GFP(S65T)-kanMX6
strain, strain background (S. pombe)	rps2302-GFP nro1Δ	this study		PEY1806: h- his3-D1 leu1-32 ura4-D18 ade6-M210 rps2302+-GFP(S65T)-kanMX6 nro1Δ::natMX6
strain, strain background (S. pombe)	rps2302-GFP ofd1Δ	this study		PEY1847: h- his3-D1 leu1-32 ura4-D18 ade6-M210 rps2302+-GFP(S65T)-kanMX6 ofd1Δ::natMX6
strain, strain background (S. pombe)	rps2302-GFP ofd1 H142A D144A	this study		PEY1848: h- his3-D1 leu1-32 ura4-D18 ade6-M210 rps2302+-GFP(S65T)-kanMX6 ofd1 H142A D144A
strain, strain background (S. pombe)	rps2302 P62A-GFP	this study		PEY1849: h+ his3-D1 leu1-32 ura4-D18 ade6-M210 rps2302 P62A-GFP(S65T)- TADH1-PURA4-kanr-TTEF
strain, strain background (S. pombe)	mCherry-ofd1	this study		PEY1807: h- his3-D1 leu1-32 ura4-D18 ade6-M210 mCherry-ofd1-TADH1-PURA4-kanr-TTEF
strain, strain background (S. pombe)	mCherry-ofd1 rps23Δ	this study		PEY1808: h- his3-D1 leu1-32 ura4-D18 ade6-M210 rps23Δ::natMX6 mCherry-ofd1-TADH1-PURA4-kanr-TTEF
strain, strain background (S. pombe)	mCherry-ofd1 nro1Δ	this study		PEY1809: h- his3-D1 leu1-32 ura4-D18 ade6-M210 nro1Δ::kanMX6 mCherry-ofd1-TADH1-PURA4-kanr-TTEF
strain, strain background (S. pombe)	rps2302Δ sre1N	this study		PEY1811: h- his3-D1 leu1-32 ura4-D18 ade6-M210 rps2302Δ::natMX6 sre1(aa1-440)
strain, strain background (S. pombe)	rps23Δ sre1N	this study		PEY1812: h- his3-D1 leu1-32 ura4-D18 ade6-M210 rps23Δ::natMX6 sre1(aa1-440)
strain, strain background (S. pombe)	rps23Δ ofd1Δ sre1N	this study		PEY1813: h+ his3-D1 leu1-32 ura4-D18 ade6-M210 ofd1Δ::kanMX6 rps23Δ::natMX6 sre1(aa1-440)
strain, strain background (S. pombe)	rps2302Δ ofd1Δ sre1N	this study		PEY1814: h+ his3-D1 leu1-32 ura4-D18 ade6-M210 ofd1Δ::kanMX6 rps2302Δ::natMX6 sre1(aa1-440)
strain, strain background (S. pombe)	sre1Δ	PMID: 15797383		PEY522: h- his3-D1 leu1-32 ura4-D18 ade6-M210 sre1Δ::kanMX6
strain, strain background (S. pombe)	WT	Bioneer		ED666: h+ leu1-32 ura4-D18 ade6-M210
strain, strain background (S. pombe)	rps23Δ	Bioneer		h+ ade6A14:E25-M210 or ade6-M216 ura4-D18 leu1-32 rps23Δ::kanMX4
strain, strain background (S. pombe)	rpl23Δ	Bioneer		h+ ade6-M210 or ade6-M216 ura4-D18 leu1-32 rpl23Δ::kanMX4
strain, strain background (S. pombe)	sre1Δ	Bioneer		h+ ade6-M210 or ade6-M216 ura4-D18 leu1-32 sre1Δ::kanMX4
strain, strain background (S. pombe)	rps25Δ	Bioneer		h+ ade6-M210 or ade6-M216 ura4-D18 leu1-32 rps25Δ::kanMX4
strain, strain background (S. pombe)	GST-rps2302-kanr	this study		PEY1816: h+ his3-D1 leu1-32 ura4-D18 ade6-M210 GST-rps2302-TADH1-PURA4-kanr-TTEF
strain, strain background (S. pombe)	rps2302+-kanr	this study		PEY1817: h+ his3-D1 leu1-32 ura4-D18 ade6-M210 rps2302+-TADH1-PURA4-kanr-TTEF
strain, strain background (S. pombe)	ofd1Δ sre1N	PMID: 18418381		PEY873: h- his3-D1 leu1-32 ura4-D18 ade6-M210 ofd1Δ::kanMX6 sre1(aa1-440)
strain, strain background (S. pombe)	sre1N	PMID: 18418381		PEY875: h- his3-D1 leu1-32 ura4-D18 ade6-M210 sre1(aa1-440)
strain, strain background (S. pombe)	2XSRE-ura4+ sre1N	PMID: 15797383		PEY1290: h+ his-D1, leu1-32, ade6-M210, ura4-D18::2xSRE-ura4+-kanMX, sre1(aa1-440)
strain, strain background (S. pombe)	2XSRE-ura4+ sre1Δ	this study		PEY1489: h+ his-D1, leu1-32, ade6-M210, ura4-D18::2xSRE-ura4+-kanMX, sre1Δ::kanMX6
strain, strain background (S. pombe)	nro1Δ sre1N	PMID: 15797383		PEY1410: h- his3-D1 leu1-32 ura4-D18 ade6-M210 nro1Δ::kanMX4 sre1(aa1-440)
strain, strain background (S. cerevisiae)	Yeast two-hybrid	PMID: 8978031		AH109: MATα trp1-901 leu2-3,112 ura3-52 his3-200 gal4Δ gal80Δ LYS2∷GAL1UAS-GAL1TATA-HIS3 GAL2UAS-GAL2TATA-ADE2 URA3∷MEL1UAS-MELTATA-lacZ
recombinant DNA reagent	pSLF101 (vector)	PMID: 8332516
recombinant DNA reagent	pART1 (vector)	PMID: 3034608
recombinant DNA reagent	pGEX-4T3 (vector)	GE Healthcare Life Sciences
recombinant DNA reagent	pSLF172 (vector)	PMID: 9218719
recombinant DNA reagent	pProEX-HTb (vector)	Invitrogen
recombinant DNA reagent	ppMAL-c5X (vector)	NEB
recombinant DNA reagent	EV bait (vector)	Clontech Matchmaker Gal4 Two-hybrid		Gal4_BD
recombinant DNA reagent	EV prey (vector)	Clontech Matchmaker Gal4 Two-hybrid		Gal4_AD
recombinant DNA reagent	human RPS23 (cDNA)	Duke Screening Center
recombinant DNA reagent	human OGFOD1 (cDNA)	Invitrogen Ultimate ORF	Invitrogen: 1OH23210
recombinant DNA reagent	nro1+ (plasmid)	PMID: 21481773		Progenitors: PCR; pSLF101 vector
recombinant DNA reagent	nro1 P6D, G8D, A11D, L15D (plasmids)	this study		Progenitors: nro1+ plasmid
recombinant DNA reagent	rps2302+, P4D, G6D, A9D, L13D (plasmids)	this study		Progenitors: PCR; pART1 vector
recombinant DNA reagent	GST-Rps23/Nro1 bacterial expression plasmids	this study		Progenitors: PCR; pGEX-4T3 vector
recombinant DNA reagent	GST-rps2302 (plasmid)	this study		Progenitors: PCR; pSLF172 vector
recombinant DNA reagent	GST (plasmid)	this study		Progenitors: PCR; pSLF172 vector
recombinant DNA reagent	sre1N (plasmid)	PMID: 15797383		Progenitors: PCR; pSLF101 vector
recombinant DNA reagent	ofd1 bait (plasmid)	this study		Progenitors: PCR; Gal4_BD vector
recombinant DNA reagent	OGFOD1 bait (plasmid)	this study		Progenitors: OGFOD1 cDNA; Gal4_BD vector
recombinant DNA reagent	rps23 pombe prey (plasmid)	this study		Progenitors: PCR; Gal4_AD vector
recombinant DNA reagent	RPS23 human prey (plasmid)	this study		Progenitors:RPS23 cDNA; Gal4_AD vector
recombinant DNA reagent	MBP-Rps23 (plasmid)	this study		Progenitors: PCR; pMAL-c5X vector
recombinant DNA reagent	ofd1 bacterial expression plasmid	PMID: 21481773		Progenitors: PCR; pProEX-HTb vector
recombinant DNA reagent	nro1 bacterial expression plasmid	PMID: 21481773		Progenitors: PCR; pProEX-HTb vector
recombinant DNA reagent	6xHis-RPS23 (plasmid)	this study		Progenitors: RPS23 cDNA; pProEX-HTb vector
antibody	IRDye800CW/IRDye680RD secondaries	LI-COR		(1:20000)
antibody	anti-Nro1 (rabbit polyclonal)	PMID: 15797383		(1:10000)
antibody	anti-Dsc5 (rabbit polyclonal)	PMID: 22086920		(1:10000)
antibody	anti-Sre1 (rabbit polyclonal)	PMID: 15797383		(1:2500)
antibody	anti-Ofd1 (rabbit polyclonal)	PMID: 18418381		(1:10000)
antibody	anti-GST (mouse monoclonal)	Covance	Covance:MMS-112R	(1:1000)
antibody	anti-GFP (mouse monoclonal)	Roche Applied Science	Roche:1814460	(1:1000)
antibody	anti-Rps23 (mouse monoclonal)	Santa Cruz	Santa Cruz:sc-100837	(1:200)
antibody	anti-Rps5 (mouse monoclonal)	Santa Cruz	Santa Cruz:sc-390935	(1:100)
antibody	anti-actin (mouse monoclonal)	Santa Cruz	Santa Cruz:sc-47778	(1:200)
Chemical compound, drug	DMOG	Frontier Scientific	Frontier Scientific:D1070
Chemical compound, drug	DSP	Thermo Fisher Pierce	Thermo Fisher Pierce:22586
Chemical compound, drug	Heavy lysine	Cambridge Isotope Laboratories	Cambridge Isotope Laboratories:CNLM-291-H-1
Chemical compound, drug	LMB	Cell Signaling	Cell Signaling:9676
